# Supplementary material for: Lung tumoroids as a testing platform for precision CAR T-cell therapy
Source: Research Square preprint supplement (doi:10.21203/rs.3.rs-5418471/v1), 2025-01-16
Supplement: Supplementary file 1 [file 36f02d8d34ced1871f098f89.xlsx]

## Sheet: Autophagy
Gene	TO18	TO17	TO9
ATG12	3.29887	3.48674	3.35696
GABARAP	3.31018	2.53474	2.53474
ATG7	3.72864	3.59581	3.69155
PRKAA2	3.86877	3.86631	3.90692
GABARAPL2	3.89055	3.93678	3.89199
PRKAA1	3.57101	3.13531	2.53474
BECN1	3.8028	3.72137	3.80018
ULK3	3.35752	3.26254	3.37079
PIK3C3	2.53474	3.56308	2.53474
ATG4A	3.55999	3.53936	3.54599
ATG4C	2.53474	2.53474	2.53474
PIK3R4	3.43155	3.4423	3.44759
GABARAPL1	3.41353	3.0984	2.53474
ATG5	2.53474	2.53474	2.53474
ATG3	3.25632	2.53474	2.53474
ATG4B	3.34637	3.48284	2.53474

## Sheet: Immune Evasion
Gene	TO18	TO17	TO9
IGLV2-18	2.53474	2.53474	2.53474
IGLV3-10	2.53474	2.53474	2.53474
IGLV3-9	2.53474	2.53474	2.53474
IGKV2D-30	3.46828	2.53474	2.53474
IGHV1OR15-1	2.53474	2.53474	2.53474
SMIM26	2.53474	2.53474	3.33687
IGLV1-36	2.53474	2.53474	2.53474
IGHV3-21	2.53474	2.53474	2.53474
IGHV2-26	2.53474	2.53474	2.53474
IGKV3D-20	2.53474	2.53474	2.53474
TINCR	2.53474	2.53474	2.53474
TRBV28	2.53474	2.53474	2.53474
RBM47	2.53474	2.53474	2.53474
TMEM129	3.28743	3.35333	3.59519
UBA6	3.31531	2.53474	2.53474
ESYT2	3.26088	2.53474	2.53474
SHTN1	3.51431	3.64384	3.62259
TMEM223	3.15327	2.90634	2.53474
TMEM120B	3.50658	3.41307	3.52004
ARHGAP10	3.39612	3.51704	3.3667
SLC22A23	3.2649	3.40417	2.53474
BICDL2	2.53474	3.19634	2.53474
ARHGEF37	2.53474	3.21537	2.53474
PXDNL	2.53474	2.53474	3.26372
ILVBL	2.53474	2.53474	2.53474
PLEKHG3	2.53474	3.39879	2.53474
ELOVL7	3.48262	3.63133	3.54404
SSC5D	3.36855	3.40085	3.37071
SH3PXD2B	2.53474	2.53474	2.53474
ZBTB7C	3.42679	3.57842	3.44896
ANKRD18B	3.41684	2.53474	2.53474
PTPDC1	2.53474	2.53474	2.53474
HFM1	3.10701	2.53474	2.53474
NBAS	3.33589	2.53474	2.53474
TARS3	3.47953	2.53474	2.53474
TESPA1	3.37978	3.4344	3.39061
HYKK	3.27398	3.29197	2.53474
FAM234B	2.53474	2.53474	2.53474
TYW5	2.53474	2.53474	2.53474
DENND3	3.32756	2.53474	2.53474
FUOM	3.4941	3.41982	3.48733
TMEM131L	2.53474	2.53474	2.53474
VWA8	2.53474	2.53474	3.26099
SBNO1	2.53474	3.33299	2.53474
CRPPA	3.58621	3.60602	3.37115
GTPBP10	3.43455	3.36735	3.42604
WDR91	2.53474	2.53474	2.53474
KLRG2	3.49244	3.40179	3.48731
RAB19	3.24418	3.24909	2.53474
DENND11	3.44204	2.53474	2.53474
GRID2IP	2.53474	2.53474	2.53474
EFCAB5	2.53474	3.22399	3.25738
VPS37C	2.53474	2.53474	2.53474
PEDS1	2.53474	2.53474	2.53474
TRAPPC13	3.50595	3.60689	2.53474
CNOT1	3.48483	3.26964	3.4452
CDHR4	2.53474	2.53474	2.53474
CCDC88B	3.54341	3.52193	3.58751
C2orf72	2.53474	2.53474	2.53474
FAM83G	2.53474	2.53474	2.53474
PALM3	2.53474	2.53474	3.42344
PGP	3.27818	3.35753	3.27536
MEIS3P1	3.49788	3.36307	3.57103
RCCD1	2.53474	3.43532	2.53474
SOWAHB	3.30398	2.53474	2.53474
ZNF316	3.44276	2.53474	3.38087
TCAF2	3.39736	3.25735	3.33865
TLCD2	2.53474	2.53474	2.53474
TVP23A	3.31693	3.37647	2.53474
TUBAL3	2.53474	3.19918	3.26612
SMCHD1	2.53474	2.53474	3.18679
CASTOR2	3.71747	3.67975	3.7386
ARHGAP42	3.55022	3.55719	3.57572
UNC119B	3.30336	3.34379	3.54953
METTL15	2.53474	2.53474	2.53474
LIPT2	3.54381	3.46683	3.55752
SAC3D1	3.35685	3.38904	3.28912
OR5H1	3.43138	3.33063	3.45857
ANXA2P2	3.28668	2.53474	2.53474
COL6A6	2.88222	2.53474	2.53474
C15orf61	2.53474	2.53474	2.53474
ZSWIM8	2.53474	2.53474	2.53474
MYH7B	3.43689	3.51527	2.53474
ARHGAP32	3.28094	3.23738	2.53474
TBKBP1	2.53474	3.00056	2.53474
SOBP	3.03293	3.22179	2.53474
POM121C	2.53474	2.53474	2.53474
A2ML1	2.53474	2.53474	2.53474
YDJC	3.40089	3.41172	3.30268
CYSRT1	2.53474	2.53474	2.53474
LYRM9	2.53474	2.53474	2.53474
CENPX	2.53474	2.53474	2.53474
FOXI3	2.53474	2.53474	2.53474
FAM171A2	2.53474	2.53474	2.53474
PHF20L1	3.22191	2.53474	3.06522
ELAPOR2	2.53474	2.53474	2.53474
NUDT19	2.53474	2.53474	2.53474
CXorf49B	3.53586	3.48542	3.54315
COL6A5	3.56645	3.59201	3.53101
MIF4GD	2.53474	2.53474	3.45221
MYO1G	2.53474	2.53474	2.53474
HACD1	2.53474	2.53474	2.53474
ESPN	3.41792	3.26498	3.34932
MYO9A	2.53474	2.53474	2.53474
SMIM1	2.53474	2.53474	2.53474
PPP1R3G	2.53474	2.53474	2.53474
KIF28P	2.53474	2.53474	2.53474
UMAD1	2.53474	2.53474	2.53474
TMEM238	2.53474	2.53474	2.53474
MCRIP1	2.53474	2.53474	2.53474
KBTBD13	3.06532	3.06746	3.08114
AKR1B15	2.53474	3.46817	3.50841
NACA	3.48343	2.53474	3.46532
SMIM22	3.52894	3.54469	3.47735
DNASE2	3.33053	2.53474	2.53474
AGPS	2.53474	2.53474	3.4163
UBXN8	3.52223	2.53474	3.47092
KIF2A	3.50787	3.55043	3.4721
TK2	3.6981	3.66328	3.73631
FZD9	2.53474	3.27558	3.21294
DDX39A	3.65583	3.50699	3.63816
PDLIM1	3.40352	3.33257	3.37031
ACOT7	2.53474	2.53474	2.53474
MYO1C	3.66064	3.80112	3.61834
MYO1F	2.53474	3.52081	3.7332
SNAP23	3.73693	3.54705	3.56086
HAX1	3.45002	3.69785	3.48768
EYA2	3.35253	3.4318	3.22727
AIP	3.48027	3.48781	3.48582
GTPBP1	3.54127	3.60635	3.58812
LGALS9	2.53474	2.53474	2.53474
STXBP3	3.57688	3.49561	3.60308
AP4M1	3.49897	3.45437	3.49746
ARVCF	3.29761	3.26201	2.53474
RAB27B	3.3136	2.53474	3.33121
AP3B1	3.3964	3.29446	3.35757
SULT2B1	3.49651	3.40626	3.42341
RHOD	3.3292	3.48579	3.25759
APBB1	3.54905	3.47801	3.57125
LGALS8	3.45967	3.43645	3.44128
NDUFS8	3.2176	2.53474	3.26041
HAS3	2.53474	2.53474	2.53474
TNFRSF10A	3.47551	3.60868	3.37165
NFKBIE	3.76956	3.80268	3.74792
PSMD11	3.13826	2.53474	2.53474
PSMD12	2.53474	3.59583	2.53474
PSMD9	3.51668	2.53474	3.33978
ATOX1	3.66068	3.66261	3.66009
MEN1	3.69311	3.68435	3.68229
CBX4	3.65198	3.54883	3.65968
GET1	3.68667	3.70833	3.62041
PGRMC1	3.46823	3.49845	3.47851
SUPT5H	3.32655	3.33518	3.33428
TAF4	2.53474	2.53474	2.53474
DFFA	3.91398	4.0022	4.05483
RFXAP	3.5102	3.49442	3.54551
HIP1	3.4306	3.4211	3.45718
CLIC1	3.71696	3.37348	3.53287
TNFRSF11B	3.30728	2.53474	2.53474
EIF3F	3.37142	3.44297	3.34886
WWP2	3.89263	3.90938	4.04328
CDC7	2.53474	2.53474	2.53474
PIK3CD	3.78013	3.76131	3.697
PDHX	3.34085	3.26511	3.49826
MATN2	2.53474	2.53474	3.27015
FOXE1	3.35242	2.53474	2.53474
QSOX1	3.62414	3.74843	3.66363
DCTN6	2.53474	2.53474	2.53474
SLC33A1	3.34324	2.53474	2.53474
WASL	3.33	3.52392	3.40396
PDE2A	3.41661	3.38477	3.37196
IPO5	3.59213	3.63613	3.50292
POLRMT	3.34348	3.41955	3.44818
EEF2K	2.53474	2.53474	2.53474
SAP18	3.64365	3.53513	3.62207
EML1	3.56867	3.51686	3.50592
IGF2BP3	3.36414	3.27437	3.39358
DNM1L	3.76521	3.76746	3.79294
RTCA	2.53474	2.53474	2.53474
PIK3C2A	3.39775	3.45781	3.38118
IFRD1	3.51855	3.4941	3.30796
PIK3R2	3.52249	3.44249	3.54125
GOLIM4	3.47108	3.50719	3.40081
MANBA	3.34462	3.31285	3.4488
TRAF5	3.34377	3.19925	3.25131
AGRN	3.53291	3.46695	3.33612
PLOD2	3.51422	3.60911	3.40178
MEIS1	2.53474	2.53474	2.53474
EXOC5	3.64963	3.70318	3.72518
BTN3A3	3.58921	3.38992	3.36994
NDUFA4	2.53474	2.53474	2.53474
PSMD14	3.44208	3.43008	3.43282
ZNF593	2.53474	2.53474	2.53474
BIN1	3.64357	3.89813	2.53474
CLDN5	3.61434	3.64457	3.57459
KPNA3	3.42331	2.53474	3.35526
STK25	2.53474	3.39984	3.62325
USP9Y	2.53474	2.53474	2.53474
BCL9	3.68972	3.59385	3.7321
LAD1	2.53474	2.53474	3.43185
FAAH	3.71157	3.82816	3.6915
KRIT1	3.35631	3.2717	2.53474
CHL1	3.61831	3.54802	3.66839
VWA5A	2.53474	3.42329	3.46803
PES1	3.2259	3.29234	2.53474
EBAG9	2.53474	2.53474	2.53474
SDCBP	2.53474	2.53474	2.53474
PITPNM1	3.67482	3.71522	3.61781
MPHOSPH10	3.76965	3.63571	3.69927
NOP56	3.68426	3.77542	3.59375
DDX3X	3.36918	3.41457	3.3695
RNASET2	3.50479	3.45917	3.56045
CCL21	3.6668	3.70431	3.67571
PODXL	3.86112	3.83509	3.78998
FCN1	3.57575	3.54957	3.50439
PIR	2.53474	3.74587	2.53474
PEX7	2.53474	2.53474	2.53474
KPNA4	3.38059	3.35311	2.53474
TRIM38	3.657	3.64028	3.72353
NFIB	3.29586	2.53474	3.27262
E2F3	3.6991	3.56699	3.54496
PPP6C	3.40985	2.53474	2.53474
NME4	3.59072	2.53474	3.52234
CES2	3.06613	3.32922	3.26834
PIK3C2B	3.5553	3.56928	3.45222
MAN2B1	2.53474	2.53474	2.53474
FBP2	3.50892	3.35167	3.72879
UBE2C	3.28144	3.28139	2.53474
ACACB	3.48273	3.55703	3.52026
PDXK	2.53474	3.82347	2.53474
SCD	3.59764	3.49634	3.66872
PLPP1	2.53474	2.53474	2.53474
PLPP3	3.52323	3.61974	3.73534
ARID1A	3.71274	3.6844	3.60503
ISLR	2.53474	2.53474	2.53474
BHLHE40	2.53474	3.81902	2.53474
SDHD	3.43537	3.38393	3.2333
C2CD2L	2.53474	2.53474	2.53474
NEMP1	2.53474	3.40332	2.53474
TXNDC9	3.78936	3.8786	2.53474
DPYSL4	3.29065	3.37014	3.49956
TRAFD1	3.56746	3.66735	2.53474
COX7A2L	3.39645	3.3225	3.41439
HSPB6	3.28779	2.53474	2.53474
UBFD1	3.37998	3.44093	3.33995
CYB561D2	3.57798	3.64325	3.73349
DYNC1I1	3.42107	2.53474	2.53474
CIT	3.70847	3.56131	3.66529
COPE	2.53474	2.53474	2.53474
RFXANK	2.53474	2.53474	3.38446
CDC42EP2	3.56941	3.488	3.62215
AP3D1	3.231	2.53474	2.53474
CCS	2.53474	2.53474	2.53474
ABLIM1	2.53474	2.53474	2.53474
DVL1	3.49684	3.44647	3.48948
DVL2	3.5442	3.58029	3.67519
DNALI1	3.3695	3.16895	3.40235
CHD1	2.53474	2.53474	2.53474
CHD2	3.30717	3.45624	3.28672
GOSR2	2.53474	2.53474	2.53474
TOR1A	3.40297	3.35405	3.33815
TOR1B	3.4057	3.46772	3.42448
STX16	3.35059	3.40587	3.38048
ADAM10	3.58075	3.64015	3.46101
ABCD4	3.53118	3.54478	3.38867
EI24	3.52371	3.58248	3.48349
TP53I11	3.53953	3.61934	3.716
PTGES	2.53474	2.53474	2.53474
KMT2D	3.48201	3.58006	3.58739
ITGB1BP1	3.43786	3.51291	3.57855
RRH	3.55839	3.87404	2.53474
APAF1	3.31958	3.28381	3.40807
RIOK3	2.53474	2.53474	2.53474
IMPA2	3.27511	2.53474	2.53474
MAP2K7	3.20635	3.20047	2.53474
ACOT8	3.41722	3.27949	3.44794
CDIPT	3.58174	3.62486	3.61355
PDCD5	3.44204	3.3459	3.42746
PRMT5	3.44817	3.64019	3.57628
CHEK1	3.87298	3.81402	3.83028
TNFRSF10B	3.54518	3.39942	3.57517
MEIS2	3.73474	3.71075	3.72483
FPGT	3.34099	2.53474	3.50995
TPP1	3.32389	3.43381	3.40323
TCERG1	3.22872	2.53474	2.53474
NDC80	3.34423	3.37735	3.32991
KIF3C	3.40687	3.49974	3.3496
NRP1	3.59601	3.60018	3.5911
TNPO2	3.43883	3.46562	3.47791
APOL1	2.53474	2.53474	2.53474
HS3ST1	3.40338	3.38826	3.40108
UNC13B	3.59407	3.66364	3.48675
POLR3A	2.53474	2.53474	2.53474
TSPAN4	2.53474	2.53474	2.53474
PSMA7	3.2972	3.25441	2.53474
SCAMP3	3.50514	3.37133	3.44296
PHYH	2.53474	2.53474	2.53474
OPLAH	3.66393	3.67997	3.60085
BCKDK	3.68864	3.75521	3.60694
IFIT3	3.46957	3.49931	3.37516
MGST3	3.60696	3.36734	3.65866
GEMIN2	3.47791	3.41644	3.47816
IRF6	2.53474	2.53474	2.53474
TAX1BP3	3.61583	3.90414	3.74266
GIPC1	3.20725	2.53474	3.46052
LIN7A	3.51339	3.37617	2.53474
IKBKB	3.52005	3.47601	3.51171
RGS12	3.32475	3.50472	3.45564
TIMM23	2.53474	2.53474	2.53474
HAT1	3.39679	3.26994	2.53474
UBE2L6	3.46225	2.53474	2.53474
CASK	3.63362	3.69812	3.64848
PLD2	3.55842	3.58604	3.60115
UQCRQ	3.37144	3.38558	2.53474
UQCR11	3.59854	3.64118	3.44215
CASQ2	2.53474	3.2655	3.26196
LECT2	3.74431	3.73388	3.78256
HGS	3.90269	3.99385	3.90796
AURKA	2.53474	3.22291	2.53474
RAB29	2.53474	2.53474	2.53474
CLGN	3.56022	3.51752	3.48708
VPS26C	3.40387	3.40073	3.46151
PPP1R12A	3.53362	3.63392	3.51249
SLC27A2	3.42595	3.46376	3.27052
GAK	3.42913	3.34583	3.46287
HNRNPDL	3.47925	3.44553	3.46583
XPO1	3.51086	3.78384	3.77375
BTAF1	3.45898	3.48595	3.48302
ATP2A1	3.73277	3.78819	3.79255
PIP5K1B	3.65243	3.64342	3.62902
ARHGEF10	3.41985	3.41921	3.34539
ZNF609	3.31009	3.66215	3.27199
TRIM66	2.53474	2.53474	2.53474
PDZD2	3.29005	2.53474	3.24609
SPTBN2	3.33011	3.4278	3.37956
MAST4	2.53474	2.53474	3.19474
SEC16A	2.53474	2.53474	2.53474
PLXNB2	3.35176	3.44189	3.40085
AREL1	3.31716	2.53474	2.53474
RIMBP2	3.5227	3.57485	3.4151
KHNYN	3.53586	3.56453	3.55368
TECPR2	2.53474	2.53474	3.35817
SEMA3E	2.53474	2.53474	2.53474
U2SURP	3.31812	3.32455	3.37563
SETD1A	3.39732	3.32542	3.45316
TRANK1	2.53474	2.53474	2.53474
KDM6B	3.57054	3.52455	3.50249
PER2	3.36222	3.35955	3.38013
SYNJ2	2.53474	2.53474	2.53474
SYNM	2.53474	3.1555	2.53474
GARRE1	2.53474	2.53474	3.33863
KIF3B	3.28396	3.25137	3.36296
PFAS	3.44513	2.53474	2.53474
MCF2L	3.0689	2.53474	2.53474
NACAD	3.34604	3.23716	3.36275
DCLK1	3.4573	3.40322	3.49248
CEP290	3.19222	2.53474	3.20304
ERC2	2.53474	2.53474	2.53474
ANKRD28	3.47402	3.19816	2.53474
ARHGEF11	2.53474	2.53474	2.53474
PRORP	2.53474	2.53474	2.53474
CHUK	3.34434	3.15324	3.14172
LSM1	3.292	3.36458	3.37214
FYB1	3.43961	3.42954	3.34116
NPC1	3.31495	3.23681	3.26564
AGPAT2	3.60871	3.47838	3.51686
DEGS1	2.53474	2.53474	2.53474
ANGPT2	3.65054	3.60409	3.654
SCAMP1	3.48125	3.6362	3.71423
SCAMP2	3.3829	3.31078	3.23463
KPNA5	3.07776	2.53474	2.53474
ARPC1B	3.52753	3.54954	3.49078
ARPC2	3.62945	3.679	3.74442
ARPC3	3.30368	3.25902	2.53474
BET1	3.6067	3.61853	3.66368
POLR1C	3.68449	3.73317	3.77013
PLSCR1	3.54321	3.56456	3.61196
TRIM24	3.3089	3.47023	3.44607
PGRMC2	3.56794	3.50866	3.51809
CETN3	2.53474	2.53474	2.53474
CTDSPL	3.30305	3.38036	3.42587
VILL	3.52503	3.67589	3.62552
RGL2	3.15372	2.53474	3.07769
PFDN6	2.53474	2.53474	2.53474
WDR46	2.53474	2.53474	3.56455
GSTA4	2.53474	2.53474	2.53474
NKRF	3.81458	3.62694	3.80598
GNPAT	3.50747	3.51973	3.52205
KMO	3.50531	2.53474	2.53474
LAMA5	3.57301	3.63538	3.46247
ZNF185	3.43382	3.61118	3.63832
CASC3	2.53474	3.44495	2.53474
MRPS12	3.31661	3.49033	3.38063
NDUFA1	3.58934	3.27486	3.46489
CLIC2	3.34214	3.241	3.4433
ACOX3	2.53474	2.53474	2.53474
RER1	2.53474	2.53474	2.53474
SURF4	3.45298	3.54375	3.44739
MAPK13	3.55752	3.5899	3.57847
SPTLC1	2.53474	2.53474	2.53474
SPTLC2	3.84008	4.00531	3.91127
OGT	3.58982	3.48604	3.5285
ALOX15B	3.56225	3.64277	3.65143
PMM2	3.31489	3.47108	3.54278
POLR3G	3.47675	3.4791	3.4675
TM9SF1	3.44869	2.53474	2.53474
INPP4B	3.66523	3.51526	3.70551
CHAD	3.46048	2.53474	2.53474
ATP6V0E1	3.64448	3.72989	3.68609
MID1	2.53474	3.32088	2.53474
HMGB3	2.53474	2.53474	2.53474
TP73	2.53474	2.53474	2.53474
PPM1G	2.53474	2.53474	2.53474
INPPL1	3.85788	3.89491	3.93261
FANCA	3.37252	2.53474	2.53474
EIF3D	3.69574	3.61247	3.71641
EIF3H	3.33312	3.37899	3.44979
HDAC3	3.26526	2.53474	3.30397
NVL	3.77072	3.7062	3.78227
BCAT2	3.66215	3.53575	3.61903
YY2	3.43358	3.43239	3.42079
BIRC5	3.35548	3.30817	3.35702
TMPRSS2	3.51564	3.56328	3.49454
NCAM2	3.45327	2.53474	2.53474
IPO8	3.40135	3.39126	3.40945
GRIN2D	2.53474	2.53474	3.3421
STX7	2.53474	2.53474	2.53474
TNRC18	3.25716	3.29591	3.29123
SLC16A3	2.53474	2.53474	2.53474
SLC31A1	3.53873	3.607	3.55371
ABCC3	3.20081	3.27479	3.23531
ABCC4	3.60064	3.65978	3.54552
ABCC5	3.57104	3.73882	3.63409
POLR1G	3.44548	3.72284	3.71161
TLR3	3.43558	3.44429	2.53474
MSH4	3.41895	3.40504	3.3616
P4HA2	3.70539	3.61567	3.65481
ST8SIA5	2.53474	2.53474	2.53474
CCL16	3.55509	3.38284	3.44473
CAPN5	3.52929	3.44748	3.38768
YKT6	3.29421	2.53474	2.53474
NUP42	2.53474	2.53474	2.53474
ARPC5	3.4145	3.4403	3.83252
POLR2D	3.60427	3.57756	3.66221
CFLAR	3.45513	3.36127	3.38802
FGF10	3.59196	3.5516	3.61269
DDX3Y	3.33161	3.31509	3.30288
MAFG	2.53474	2.53474	2.53474
OGG1	2.53474	3.43676	3.26732
CYP27B1	2.53474	2.53474	2.53474
PDPK1	3.16684	3.2137	2.53474
TAPBP	2.53474	2.53474	2.53474
RNF113A	2.53474	2.53474	2.53474
KDM6A	3.4034	3.27941	3.42248
CLDN3	3.47074	3.42095	3.56781
KCNN4	3.40912	2.53474	2.53474
DHX15	3.26528	3.19193	3.21614
RNMT	3.67797	3.72576	3.9632
ZZEF1	2.53474	2.53474	2.53474
ASAP2	3.72756	3.74406	3.69859
FLRT2	3.56968	3.61535	3.57342
TTI1	3.37568	3.42092	3.2904
PLXNB1	3.29786	3.25472	3.38241
RRP8	2.53474	2.53474	2.53474
PJA2	3.46477	3.27144	3.41896
SIPA1L1	3.25643	2.53474	2.53474
CYB5B	3.43257	3.46872	3.37636
PRPF4	3.25404	2.53474	2.53474
PHGDH	3.21005	3.27597	3.30616
NDUFS4	3.86487	3.96397	3.9358
ADAM12	3.64569	3.69363	3.57993
PHF1	3.98158	3.87688	4.01596
GPR39	3.66562	3.68497	3.6273
DYNC1LI2	3.39381	2.53474	3.11199
KLK10	2.53474	2.53474	3.47163
PSMD3	2.53474	2.53474	2.97581
RBFOX2	3.65103	3.63515	3.70852
PAPSS1	2.53474	2.53474	3.24086
SIAH2	3.71424	3.73765	3.71412
ZW10	3.13788	3.13587	2.53474
PRODH	3.42956	3.31294	3.49073
SPINT1	3.26698	2.53474	2.53474
EFS	3.50068	3.47433	3.55121
B4GALT5	2.53474	3.53573	3.48726
SART1	3.65028	3.69656	3.7385
SPINT2	3.17334	2.53474	2.53474
GPAA1	2.53474	3.40577	2.53474
DAPK3	3.55349	3.53897	3.54042
TGFB1I1	3.70068	3.85594	3.80473
SRGAP3	3.61029	3.68325	3.73881
ZBTB43	2.53474	2.53474	2.53474
AP5Z1	3.25905	2.53474	2.53474
HSPA12A	3.22505	2.53474	2.53474
CCP110	2.53474	2.53474	2.53474
ADCY6	3.46295	3.4775	3.48839
ARHGEF9	3.42901	3.52614	3.36786
CTIF	3.312	2.53474	3.2834
MTSS1	2.53474	2.53474	3.46242
PPIP5K2	2.53474	2.53474	2.53474
MAP3K7	3.17361	2.53474	2.53474
DHH	2.53474	2.53474	2.53474
EEF1E1	3.3887	3.39058	3.34277
LYRM1	3.16924	3.1674	2.53474
MSI1	3.42961	2.53474	2.53474
RIPK2	3.73766	3.76505	3.77373
WDR62	2.53474	3.19803	2.53474
HNRNPR	3.22026	3.2066	2.53474
PRPF3	3.38988	3.29446	3.30268
TXNL1	3.27208	3.28392	3.36592
TPD52L2	3.74595	3.76219	3.76538
EMC8	3.60595	3.62748	3.54466
COCH	3.54132	3.55938	3.59801
ERI3	3.76007	3.63537	3.79551
THAP12	3.52159	3.58124	3.46283
SYNJ1	2.53474	3.03227	3.13983
FIBP	2.53474	2.53474	2.53474
EIF4G3	3.32208	3.1843	3.33461
CBFA2T2	2.53474	3.32873	3.35312
PPIH	3.41533	3.41618	3.50408
MGAM	3.45925	3.41429	3.43187
MBTPS2	3.4256	2.53474	2.53474
SUV39H1	3.81748	3.8701	3.8004
HTRA2	2.53474	2.53474	2.53474
KLF4	3.32456	3.27476	2.53474
OIP5	2.53474	2.53474	2.53474
AKR7A2	3.65993	3.73868	3.65616
PROM1	3.52286	2.53474	3.3474
EPB41L2	2.53474	2.53474	3.28919
TGOLN2	3.67846	3.66049	3.72741
RAD51C	2.53474	2.53474	3.24416
LAMTOR5	3.59467	3.41915	3.55852
MED7	3.43472	3.3597	3.36321
WIPF1	3.30699	3.24051	3.30205
ATP8B1	3.35908	3.38874	3.35235
BCL2L11	3.24447	3.30474	2.53474
FOXO3	2.53474	2.53474	2.53474
XRCC3	3.30497	3.26572	3.65003
SGCE	2.53474	3.36327	2.53474
LAT	3.43392	3.34836	3.31942
RGS14	2.53474	3.43683	2.53474
RNF13	2.53474	2.53474	2.53474
CA12	2.53474	2.53474	2.53474
AKAP10	2.53474	2.53474	2.53474
SYT7	3.41759	2.53474	2.53474
DENR	3.71349	3.29842	2.53474
PSTPIP1	3.3123	3.30706	3.32249
XPOT	3.28548	3.27994	3.46057
SPRY2	3.584	3.49719	3.47516
DNPH1	2.53474	2.53474	2.53474
SPRY1	3.64752	3.63005	3.56349
SPRY3	3.28607	3.12424	2.53474
TIMM44	3.69883	3.56967	3.48068
TRAPPC3	3.35977	2.53474	3.11776
CHMP2A	2.53474	3.73609	2.53474
NCK2	3.8142	3.82814	3.7717
PSCA	3.6935	3.79881	3.71402
TSPAN6	3.49356	3.51609	3.5807
PLRG1	3.3437	3.37776	3.40583
PRC1	2.53474	2.53474	2.53474
RGS10	3.44321	2.53474	2.53474
ZNF207	3.38427	3.41611	3.33485
NDUFB5	3.37556	3.4441	3.49284
NDUFB3	2.53474	3.24515	2.53474
NDUFC1	3.72866	3.64648	3.72145
NDUFA2	3.74244	3.67812	3.60504
GET3	3.95203	3.9279	3.93689
BUB3	3.43386	3.33353	3.34336
PLPP2	3.91083	3.89879	3.82554
PI15	3.76683	3.7892	3.69917
SULT1B1	3.71258	3.69414	3.69009
ACTN4	3.40384	3.30233	2.53474
GSTZ1	2.53474	2.53474	2.53474
BUD23	2.53474	2.53474	2.53474
TRIAP1	3.73656	3.65955	3.77029
GATC	3.61756	3.80012	3.74685
HTATSF1	3.50852	3.41898	3.63785
KDELR3	3.24088	2.53474	2.53474
PRKAB2	3.38057	3.38992	2.53474
AP1G1	3.68129	3.59462	3.59702
STX6	2.53474	3.38367	2.53474
SYNGR1	3.38444	3.32674	3.37577
SYNGR2	3.65465	3.65687	3.69856
SGTA	3.65679	3.68111	3.57809
LIAS	3.61087	3.66404	3.70817
ENSA	3.93021	4.081	4.01454
SLC25A20	3.74068	3.57556	3.69695
NARS1	3.45978	3.27794	3.38939
SPOP	3.75298	3.56343	3.65684
MYO1B	3.40512	2.53474	3.72602
SSNA1	3.75573	3.67932	3.86617
SLC25A17	2.53474	2.53474	2.53474
NUDT21	3.59131	3.52138	3.64134
LANCL1	2.53474	2.53474	2.53474
STRN	3.40504	3.62302	3.49279
RRP9	3.65116	3.66068	3.61488
SCO2	3.73479	3.68227	3.70773
AKAP8	3.46869	3.40999	3.43446
GTPBP6	3.70802	3.66549	3.67931
B3GALT2	3.52787	3.44141	3.42814
SLC37A4	3.47748	3.48271	3.46796
ZBTB14	3.3557	3.41868	3.28214
IDH3B	2.53474	2.53474	2.53474
NRDC	3.62891	3.58223	3.73957
CALU	3.16801	2.53474	3.19168
EDIL3	3.64529	3.71943	3.59088
ATP9B	3.52174	3.50604	3.55947
AHCYL1	3.67198	3.83247	3.77716
SLC28A2	2.53474	2.53474	2.53474
XPNPEP2	2.53474	2.53474	2.53474
KIF1C	3.4215	3.31976	3.5834
PRICKLE3	2.53474	2.53474	3.54001
EXTL3	2.53474	2.53474	2.53474
ORC5	3.3499	3.3974	3.43162
TYROBP	2.53474	2.53474	2.53474
CHST1	3.34636	3.46637	2.53474
NDUFS5	3.62073	3.58624	3.61601
PDE6D	2.53474	2.53474	2.53474
CXCL13	3.04008	2.53474	2.53474
ORC4	3.8246	3.75544	3.73111
PEX1	3.57646	3.47026	3.53537
RAD21	2.53474	2.53474	2.53474
AKR1B10	3.58424	3.57261	3.5561
TIMM8A	3.52371	3.5035	3.38275
KALRN	3.50596	3.49336	3.52219
DHX16	4.12803	4.19051	4.19505
ZNRD2	3.84927	3.85717	3.69724
GMFG	2.53474	2.53474	3.36488
TMPRSS11D	3.50009	3.46327	3.60277
PPP1R12B	3.55402	3.55054	3.50305
BNIP3L	2.53474	2.53474	2.53474
SH3BP5	2.53474	2.53474	2.53474
HS6ST1	3.42672	3.38707	2.53474
MED14	2.53474	2.53474	2.53474
PCDH7	2.53474	2.53474	2.53474
SOX15	2.53474	2.53474	2.53474
PRPSAP2	3.45498	3.4685	3.40523
GNG7	2.53474	2.53474	2.53474
SMARCA5	3.61102	2.53474	2.53474
ADCY3	3.68695	3.57487	3.57577
GPRIN2	3.62543	3.64919	3.65781
SPAG9	3.32255	3.30203	3.32177
ZNF292	2.53474	2.53474	3.31143
URB1	2.53474	2.53474	2.53474
MGRN1	3.49784	3.4249	3.46093
SIPA1L3	3.18781	2.99117	2.53474
ZFC3H1	3.47815	3.52314	3.45971
LCMT2	3.20834	3.2061	3.26634
LZTS3	3.39156	3.44489	3.41221
KATNIP	3.43943	3.49997	3.50096
AQR	3.34734	2.53474	3.32415
MAST3	2.53474	2.53474	3.23374
CEP104	3.38504	2.53474	2.53474
OPA1	3.54309	3.55273	3.55892
MCM3AP	2.53474	3.22695	2.53474
PIP5K1C	2.53474	2.53474	2.53474
KIF1B	3.64174	3.6807	3.56694
MAPKBP1	3.41129	3.44318	3.45582
MARCHF6	2.53474	2.53474	2.53474
KDM1A	3.43221	2.53474	2.53474
TBC1D4	2.53474	2.53474	2.53474
NME2P1	3.34124	3.43126	3.41849
FADS1	3.58217	3.56471	3.58633
PPL	3.55125	3.4287	3.51135
GSDME	3.92634	3.92294	3.93794
EVI5	3.48479	3.50318	3.4792
LY75	3.57113	3.52573	3.61755
NRP2	3.50808	2.53474	3.27448
MAN1A2	2.53474	3.19629	3.32427
PLXNC1	2.53474	2.53474	3.26121
MPZL2	3.26615	2.53474	2.53474
ACSL4	3.4857	3.4423	3.49632
SNX3	2.53474	2.53474	2.53474
DOK2	3.65101	3.58326	3.51728
STX10	3.4114	3.32265	3.47764
OGA	3.59476	3.69713	3.57853
ADCY9	2.53474	2.53474	2.53474
SORBS3	3.36438	3.43416	3.2468
SYNCRIP	3.57531	3.48757	3.46498
TPST1	3.12195	2.53474	2.53474
CDC40	3.47028	2.53474	2.53474
B4GALT3	3.80027	3.78594	3.71484
B4GALT4	2.53474	2.53474	3.34557
RANBP6	3.48989	3.46611	3.48485
NEMF	2.53474	3.40756	2.53474
GMDS	3.4065	2.53474	3.38424
NMT2	3.25314	3.29012	2.53474
CCNT1	3.4293	3.45497	3.41277
BUB1B	3.61433	3.53458	3.86949
PLOD3	3.40704	3.23516	3.2115
EIF4E2	3.43254	3.32732	3.33285
CCNT2	3.29161	3.28838	3.29683
TLR5	3.60698	3.61711	3.48623
TLR2	3.49254	3.44529	3.55977
DIAPH1	3.30656	3.35847	3.34068
SELENOF	3.18441	3.14307	2.53474
TSPAN3	2.53474	3.24948	2.53474
EXOC3	3.59937	3.55834	3.55675
PLIN3	3.56982	3.66825	3.63021
SLC16A7	3.27832	2.53474	2.53474
PRMT3	3.47452	3.45895	3.45754
KPNA6	3.56046	3.67036	3.51968
SRPX2	2.53474	3.5568	3.31376
UGDH	3.51037	3.47348	3.41712
TPST2	3.58899	3.6052	3.59635
LPXN	2.53474	2.53474	2.53474
CTNND1	3.74404	3.80651	4.07869
ICMT	2.53474	3.40948	2.53474
PLA2G6	3.73053	3.683	3.70473
SNX2	3.4403	3.39986	3.36147
DPM1	3.60925	2.53474	3.61775
USO1	3.2603	2.53474	3.17621
MRPS14	3.63523	3.58694	3.62061
TOM1	3.68806	3.83569	3.69099
PFKFB2	3.57884	3.51498	3.5891
CCDC22	3.40232	3.49157	3.41088
PQBP1	3.48788	3.59941	3.58312
TIMM17B	3.56215	3.45896	3.60857
PRAF2	3.54526	3.48109	3.51115
DKC1	3.71271	3.69673	3.64701
EIF5B	3.72457	3.81288	3.68056
TRIM13	3.66028	3.76558	3.52469
GAS7	3.61818	3.62784	3.53331
EDF1	3.63509	3.59056	3.64099
KIN	3.21223	2.53474	3.18711
DIAPH2	2.53474	2.53474	2.53474
SH2D1A	3.60704	3.49252	3.62928
DNAJA2	3.40381	3.37944	3.34546
BRD4	3.31435	3.27101	3.29704
CUTA	2.53474	2.53474	2.53474
SMPD2	3.80373	3.81841	3.77962
TBL1X	3.55384	3.61247	3.52832
HUS1	3.67497	3.47412	3.56779
PFDN1	3.38559	3.38166	2.53474
PPP1R11	2.53474	2.53474	2.53474
RNASEH1	3.27139	2.53474	3.26615
NBN	3.78706	3.69835	3.4706
NOL3	3.32185	2.53474	3.45545
DTNB	3.47514	3.55828	3.45823
RNGTT	3.60551	3.56812	3.59824
FCGR3B	3.75553	3.80174	3.62681
LILRB5	3.41492	3.43065	3.24307
ABCB7	3.40479	3.4296	3.46034
PLCH2	2.53474	2.53474	2.53474
SRGAP2	3.51319	3.50392	3.35057
PLXNA2	2.53474	2.53474	2.53474
NOS1AP	2.53474	2.53474	2.53474
IGSF3	2.53474	3.30876	2.53474
FAM20B	3.45991	3.3091	2.53474
DENND4B	2.53474	2.53474	2.53474
EFCAB14	3.33723	2.53474	3.37129
FKTN	3.44847	3.57508	3.32305
ADAM23	3.25136	2.53474	3.24217
WDR1	3.29043	3.44242	3.36634
FZD7	3.09546	3.2388	2.53474
SLIT1	2.53474	3.24412	2.53474
MEGF6	3.75847	3.68699	3.74244
ATP9A	3.66315	3.59465	2.53474
N4BP1	2.53474	2.53474	2.53474
ROCK2	3.30104	3.22644	3.40694
CLASP2	2.53474	2.53474	2.53474
PTCD1	3.38836	3.33204	2.53474
COBL	3.4587	3.34267	3.53798
CPNE3	3.3016	3.30251	3.33059
DEPDC5	3.4345	3.4922	3.54994
ATG13	2.53474	2.53474	3.32123
ICOSLG	3.78154	3.70687	3.70309
PPFIA3	2.53474	3.21333	3.25759
HIP1R	3.43299	3.34512	2.53474
OBSL1	3.35927	3.32799	3.43589
RNF40	2.53474	2.53474	3.34383
PHF2	3.4393	3.35292	3.46903
ZC3H11A	2.53474	2.53474	2.53474
CLUH	3.43328	3.52869	3.5683
CAND2	3.3526	3.3319	3.39147
TSC22D2	3.53515	3.51376	3.55642
KDM4A	3.60906	3.55793	3.6311
DNAJC13	3.21698	2.53474	2.53474
PHACTR2	2.53474	2.53474	2.53474
PPP6R2	2.53474	2.53474	3.40929
ADAMTS4	3.47963	3.48152	3.45395
CNOT3	2.53474	2.53474	2.53474
ANKRD17	3.29486	3.26567	3.31659
SIN3B	2.53474	2.53474	2.53474
ATP2C2	3.47986	3.43283	3.52169
DNAJB6	3.37801	3.36328	3.3528
XYLB	3.30083	3.32379	3.29471
LRP5	3.27549	3.3047	3.3403
TMEM127	3.56733	3.58456	3.69011
COQ9	3.29086	3.38586	3.41717
GGCT	3.09353	2.53474	2.53474
NDUFS7	2.53474	3.21425	2.53474
RTN2	3.62503	3.6589	3.56182
NDUFS2	3.77776	3.72397	3.6828
ZPR1	3.92905	3.95275	3.87616
DUSP11	2.53474	2.53474	2.53474
NIPSNAP2	3.73545	3.76911	3.69868
LRRN2	3.54844	3.52555	3.57456
HMMR	3.05691	2.53474	2.9237
CILP	3.7793	3.72001	3.74117
PDCD6	2.53474	3.69739	2.53474
TBCA	3.37541	2.53474	3.39236
ATP6V1G1	2.53474	2.53474	2.53474
VPS4B	3.89563	3.85638	3.86007
MPDU1	3.588	3.44028	3.55412
ENTPD6	3.57976	3.59958	3.68025
ENTPD3	3.5246	3.47305	3.66569
ENTPD5	2.53474	3.99	3.48956
ZNF217	3.47268	3.48507	3.47567
BCAS1	3.47103	2.53474	2.53474
PTP4A3	3.22458	3.40119	3.40096
MACROH2A1	3.38178	2.53474	2.53474
SH3BGRL	2.53474	2.53474	3.2692
FLNB	2.53474	3.23649	3.22228
NCOR1	3.94195	3.9819	3.93304
VAMP4	3.3907	3.60738	3.26469
NDUFS6	3.56872	3.51662	3.6948
PEX14	3.41028	3.36117	3.36533
TRIM3	2.53474	3.2836	3.1574
TULP3	3.48563	3.52076	3.44102
SLC43A1	3.45805	3.52202	3.54506
CS	2.53474	3.34463	2.53474
SPAG7	3.29283	2.53474	2.53474
SEC22B	2.53474	3.35239	3.38596
DEAF1	3.98983	4.00953	3.96652
PRPF40A	3.60431	3.46173	3.57672
TACC1	3.57412	3.69391	3.70878
NME6	3.19764	2.53474	2.53474
CDC45	3.58603	3.65344	3.5698
GIGYF1	3.38975	3.27603	3.53954
MOSPD3	3.36267	3.39312	3.41505
LRCH4	3.34013	2.53474	3.46206
MTX2	2.53474	2.53474	2.53474
VPS26A	2.53474	2.53474	2.53474
NDUFB1	3.32114	3.39313	3.38459
PMPCB	3.5287	3.5544	3.47844
SAP30	3.60234	3.57052	3.66259
MED24	3.73615	3.75887	3.6637
KATNA1	3.66877	3.65624	3.62514
RDH16	3.41266	3.40534	2.53474
ERN1	3.38891	3.38558	3.31941
E2F6	3.50188	3.41518	3.44556
CRLF1	2.53474	3.48604	2.53474
PSIP1	3.30962	3.37209	3.35424
ERLIN1	3.3326	3.27725	3.33526
SUPT3H	2.53474	2.53474	2.53474
GPC4	3.64361	3.59858	3.66499
NDUFS3	3.71297	3.67313	3.69137
SRSF10	3.49452	3.51967	2.53474
GMNN	3.45932	3.4413	2.53474
CLN5	3.84781	3.87295	3.79284
HSBP1	3.87044	3.89547	3.86469
ECI2	3.56793	2.53474	3.46067
KHDRBS3	2.53474	3.46736	3.60092
TADA3	3.70025	3.67814	3.69515
TAF5L	3.7212	3.77281	3.53461
EED	3.35664	3.52757	3.50837
BANF1	3.27984	2.53474	2.53474
SF3B1	3.34769	3.39239	3.34497
CSDE1	3.46093	3.52955	3.55637
WBP4	3.66648	3.68109	3.70702
STX11	3.68229	3.67991	3.68692
SKAP2	3.64605	3.51027	3.67056
PRKRA	3.40618	3.4315	3.42849
MTRF1	2.53474	2.53474	2.53474
CRCP	2.53474	2.53474	2.53474
LRP6	3.67275	3.62428	3.64381
RPS6KA5	3.52783	2.53474	3.4769
MED6	3.15901	2.53474	3.1714
MYCBP2	3.28065	2.53474	3.29987
PGLYRP1	3.26704	2.53474	2.53474
GCAT	3.5548	3.51395	3.53659
SPAG6	3.33867	3.34275	3.35597
NPM3	2.53474	2.53474	2.53474
LYPLA1	3.40792	3.33598	3.36826
ERAL1	2.53474	2.53474	2.53474
DEDD	3.70055	3.61658	3.51275
REM1	3.95079	3.6938	3.86927
CREG1	3.51522	3.49843	3.49693
SERPINB7	2.53474	2.53474	3.28222
FCN3	2.53474	2.53474	2.53474
SNRNP200	3.37644	3.60115	3.43741
TRMU	2.53474	3.51142	2.53474
TIPRL	2.53474	2.53474	2.53474
OFD1	3.71881	3.72766	3.71239
TOM1L1	3.41676	3.46473	3.3783
RPS6KA4	3.51345	3.59857	3.49601
SURF6	2.53474	2.53474	2.53474
PPM1B	3.48458	3.47756	3.45683
ADAP1	3.42572	3.321	3.35992
UTP20	3.62383	3.59705	2.53474
NUP155	3.56111	3.46718	3.58941
RP2	2.53474	2.53474	3.57311
GPX5	3.37989	3.42917	3.37409
STK16	3.63652	3.67709	3.6011
WDHD1	3.48402	3.4554	3.48545
CRTAP	2.53474	2.53474	2.53474
SLC25A12	3.35113	3.29897	3.39866
B3GALNT1	3.43677	3.40321	3.5357
RAD51D	3.52477	3.60866	3.44071
PALM	3.59002	3.63925	3.50475
ATP6AP2	3.40401	2.53474	2.53474
GRAP2	2.53474	3.03384	2.53474
RNASEH2A	2.53474	2.53474	3.42424
CDC123	3.54372	3.61837	3.60798
ZMYND10	2.53474	2.53474	2.53474
CAPN15	3.60298	3.32343	3.53109
BCAR3	3.40341	3.42714	3.5212
POP7	2.53474	2.53474	2.53474
RPP40	2.53474	2.53474	3.37201
EIF3G	3.41067	3.4172	2.53474
EIF3J	2.53474	3.46686	3.51051
CBR3	3.39948	3.44784	3.39959
PSMD10	3.71924	3.57949	3.66058
AP1G2	3.68108	3.60154	3.72882
ZMPSTE24	3.64854	3.86658	3.66196
SC5D	3.50454	3.49333	3.53198
PPP1R37	3.1947	3.3997	3.3022
TRAPPC6A	3.54389	3.69662	3.62849
IDH1	2.53474	2.53474	3.5282
GATB	2.53474	2.53474	2.53474
SCO1	3.34907	3.45155	3.32199
CYP7B1	3.86532	3.89232	3.96401
ATRN	3.50931	3.44427	3.43136
RBBP9	3.44419	3.51841	2.53474
STAM2	2.53474	2.53474	2.53474
TNFSF13	3.20269	3.11321	3.33604
ALDH1L1	3.65536	3.59502	3.55528
TUSC2	3.46624	3.44095	3.44287
RASSF9	3.28834	2.53474	3.73916
DGAT1	3.241	3.38864	3.43353
CCNK	2.53474	2.53474	2.53474
DHRS3	2.53474	2.53474	2.53474
ARL6IP5	3.1616	3.1429	3.48006
DYSF	3.53367	3.54232	3.50028
PIAS1	3.61417	3.39908	3.51948
PIAS2	3.64417	3.80531	3.61902
BCAS2	2.53474	3.44423	2.53474
DCTN3	3.16854	3.10165	3.17929
DNAJC8	2.53474	2.53474	2.53474
SMNDC1	3.74151	3.69441	3.70439
RAD17	3.67841	3.68566	3.67869
ATP5PD	3.57951	3.49651	3.6913
DNAJB5	3.72472	3.66266	3.71567
TSPAN9	3.25369	2.53474	3.28956
FLOT1	3.81733	3.86556	3.77891
TRIO	2.53474	2.53474	2.53474
ATP5MG	3.35026	3.443	3.28585
MPDZ	3.56101	3.66816	3.49084
CPD	3.35114	3.29776	3.28293
SASH3	3.83394	3.9863	3.86293
GLRX3	3.29143	2.53474	2.53474
KRT36	3.43882	3.68993	3.52458
RSL1D1	2.53474	2.53474	2.53474
WFS1	3.76564	3.6641	3.65566
ANXA9	2.53474	2.53474	2.53474
CLPX	3.75111	3.75519	3.67177
NEBL	3.52661	3.60595	3.453
NEURL1	2.53474	2.53474	2.53474
SEC14L2	3.51959	3.59004	3.5346
STC2	3.30953	3.37345	2.53474
TM7SF2	2.53474	2.53474	2.53474
SNCG	3.44388	3.28456	3.36843
CIAO1	3.12102	3.30497	3.23342
PDE5A	3.61118	3.7191	2.53474
DFFB	3.54037	3.44794	2.53474
SLC22A5	3.4477	3.30776	3.44624
PDE9A	2.53474	2.53474	2.53474
SRP72	3.41726	3.3333	3.46933
CST7	2.53474	3.46373	2.53474
DXO	2.53474	3.33965	2.53474
DDAH1	3.6825	3.63803	3.64675
RECQL5	3.23661	2.53474	2.53474
URI1	3.51953	3.39907	3.85343
B3GAT3	3.28006	3.23987	3.40715
STK17B	3.37481	3.3099	3.45976
MTA2	3.4982	3.39069	3.42151
USP1	3.70925	3.6646	2.53474
ALDH1A2	2.53474	2.53474	2.53474
STK10	3.69608	3.64673	3.58989
PRKD3	2.53474	2.53474	2.53474
GFPT2	2.53474	2.53474	2.53474
TPPP	3.37008	2.53474	2.53474
SLIT2	3.35003	2.53474	2.53474
ATG12	3.29887	3.48674	3.35696
KBTBD11	3.35002	3.23104	3.62067
LTN1	2.53474	2.53474	2.53474
TOMM70	3.6038	3.60769	3.59082
PLEKHG5	2.53474	2.53474	3.45339
IPO13	3.43572	3.47591	3.40961
DDHD2	3.80095	3.86935	3.80288
MYO1D	2.53474	2.53474	2.53474
TOX4	3.24206	3.31006	3.22377
MICAL2	3.48525	3.29602	3.30921
SEC24D	3.53034	3.55807	3.55718
SUPT7L	3.5285	3.52448	3.57793
UFL1	2.53474	3.34411	2.53474
SORBS2	2.53474	3.59853	2.53474
TMCC1	3.31456	3.30509	3.29325
PHF14	3.62125	3.68798	3.6298
TMEM63A	2.53474	2.53474	2.53474
FARP2	3.24987	3.48592	3.33301
UBXN7	3.47632	3.43345	3.44614
SUN1	3.46468	3.4843	3.35971
PLPBP	3.28118	3.31353	3.43116
ERLIN2	3.51262	3.3418	3.4008
PRPF6	3.49112	3.52911	3.5615
DKK1	3.92069	3.67078	3.72053
ADGRL1	3.91979	3.79386	3.72011
ABCA8	3.61589	3.61349	3.57222
PCF11	2.53474	2.53474	2.53474
FRYL	2.53474	2.53474	2.53474
NFAT5	2.53474	2.53474	2.53474
ENDOD1	3.37988	3.41441	3.42311
GLCE	3.36595	3.40327	3.34935
GLS	3.2044	3.26739	3.29197
HAUS5	3.50787	3.55362	3.4479
FBXO21	3.41081	3.55218	3.50301
KDM4B	3.60313	3.60974	3.50903
SLCO2B1	3.41542	2.53474	3.31713
SOGA1	3.40381	3.37287	3.44008
USP19	3.37364	3.48661	3.35299
WDR47	2.53474	2.53474	2.53474
AP2A2	3.32833	3.34666	2.53474
SEC31A	3.40231	3.36902	3.44763
CLSTN1	3.28014	3.18462	2.53474
FAM13A	3.52681	3.55201	3.55984
HEXIM1	3.42867	3.49223	3.50995
TJP3	3.43611	3.21	3.42034
INMT	2.53474	2.53474	2.53474
CCNB2	3.38523	3.41342	3.35334
YIF1A	2.53474	3.28281	3.54431
UBR5	2.53474	2.53474	2.53474
REC8	2.53474	2.53474	2.53474
AGFG2	3.48085	3.66375	3.54007
PRSS23	3.50812	3.50491	3.41808
SCAF4	2.53474	2.53474	2.53474
NDUFB6	2.53474	3.38547	3.39917
MFN2	3.26945	3.29598	2.53474
DUSP14	3.57158	3.59748	3.60315
SNUPN	3.60247	3.59155	3.5397
AKR7A3	3.54482	3.52513	3.47055
UBE4B	3.23065	2.53474	2.53474
ZFPL1	3.40785	2.53474	2.53474
ELP1	2.53474	2.53474	3.05742
UBL3	3.44092	3.34571	3.3525
GABARAP	3.31018	2.53474	2.53474
NDUFA3	3.54665	3.55134	3.45768
NDUFB4	2.53474	2.53474	3.45576
NDUFB8	3.30464	2.53474	2.53474
SCEL	3.8731	3.86765	3.84067
NDUFB2	3.46525	3.38701	3.4489
CACNA1H	3.8014	3.81678	3.72514
NDUFA7	3.41193	2.53474	3.22835
VAMP5	3.0893	2.53474	2.53474
RTN3	2.53474	2.53474	2.53474
ZNF205	3.62117	3.59517	3.55834
LETM1	2.53474	3.24117	2.53474
EPN2	3.81422	3.92969	3.87083
STBD1	2.53474	2.53474	2.53474
ZRANB2	3.6354	3.66399	3.58932
SNX4	3.54243	3.55661	3.39437
ZWINT	3.3446	3.4207	2.53474
LUC7L3	3.3419	2.53474	3.36628
KIF20A	3.42968	3.44473	3.52048
APOL3	3.39427	2.53474	3.24188
KIF4A	3.67154	3.60579	3.67264
MBD4	2.53474	3.52522	2.53474
SBF1	2.53474	2.53474	2.53474
GOSR1	3.37572	3.28008	3.4445
KAT7	3.31369	3.24423	3.26957
SLC25A14	3.3597	3.3506	3.34902
ATE1	3.2961	3.30101	3.34545
RASGRP1	3.42921	3.43385	3.42114
TNKS	2.53474	2.53474	2.53474
CCNDBP1	3.31277	2.53474	3.3496
VAPB	2.53474	2.53474	2.53474
RASAL1	2.53474	2.53474	3.26489
SNAPIN	2.53474	2.53474	3.45707
MPZL1	3.68623	3.71159	3.69344
NDUFC2	2.53474	3.29362	3.5825
NDUFA10	3.48306	3.34298	3.47951
FKBP9	3.51791	3.61352	3.53164
CELF2	3.50016	2.53474	3.60097
PGLS	3.71765	3.67756	3.71326
PAPSS2	3.67939	3.56658	3.69576
SMC2	2.53474	2.53474	2.53474
ATG7	3.72864	3.59581	3.69155
TACC2	3.41729	2.53474	2.53474
TRIM16	3.5657	3.5331	3.56285
FARS2	3.38887	3.41479	3.46853
ZBTB7A	3.34072	3.10602	3.22429
LYPLA2	3.79834	3.73368	3.64385
IPO7	3.46797	3.45141	3.45371
ARIH2	3.38182	3.47394	3.40621
GJB5	3.65652	3.54551	3.66969
TNFAIP8	3.69787	3.73117	3.6828
MAP3K6	3.34484	3.3524	3.33065
SLU7	2.53474	2.53474	2.53474
PGM3	3.3035	2.53474	2.53474
GCNT3	3.31022	3.22671	3.29376
MOCS3	3.30293	3.23487	3.21287
CD2BP2	3.53211	3.51939	3.48998
MED26	2.53474	2.53474	3.48232
ZFYVE9	3.42828	3.26642	3.42818
ZIC2	3.22771	3.27816	2.53474
SVIL	2.53474	2.53474	2.53474
PIGN	3.35749	3.48592	2.53474
PAPLN	2.82481	2.53474	2.53474
BAG4	3.49822	3.50465	3.40711
AHSA1	3.24479	3.30216	3.39675
SLC34A2	2.53474	3.53887	2.53474
APOM	3.49414	3.3277	3.4442
PARN	3.75882	3.72875	3.79256
PSMG1	2.53474	2.53474	2.53474
FMNL1	2.53474	2.53474	2.53474
SGPL1	3.59257	3.49258	3.56781
CLDN7	3.77948	3.58971	3.78476
CTDNEP1	2.53474	2.53474	2.53474
ABCA1	3.62339	3.70665	3.64456
NSA2	3.29127	3.38602	2.53474
H6PD	3.48982	3.5477	3.5477
SEC24A	2.53474	2.53474	2.53474
SEC24B	3.62877	3.55491	3.41122
ADGRL2	3.51797	3.44247	3.61588
VNN1	3.44704	3.5264	3.57148
VNN2	3.45955	3.35273	3.39538
CBX6	3.28736	3.34706	3.42139
SLC2A10	2.53474	2.53474	2.53474
NADK	2.53474	2.53474	2.53474
TDP2	3.37177	3.24594	3.38505
SFT2D2	2.53474	3.59849	2.53474
MPC2	2.53474	2.53474	3.48032
ETHE1	3.48748	3.4274	3.58394
ACSL3	2.53474	2.53474	2.53474
POLR1A	3.63951	3.80093	3.63536
PCNT	3.35334	3.48638	3.60928
YEATS4	3.59941	3.68132	3.76057
DUS4L	3.45413	3.46681	3.46523
ZBTB11	3.23091	3.26441	2.53474
CNOT4	3.39949	3.35547	2.53474
STAMBP	3.35309	3.20257	2.53474
NTN1	3.32903	3.23076	3.31411
CPSF4	2.53474	2.53474	2.53474
NFATC1	3.4355	3.33058	3.33798
ASMTL	2.53474	2.53474	2.53474
CDS2	3.08908	2.94344	3.1393
KRT75	2.53474	3.50368	3.26668
CEP43	3.46481	3.50761	3.45032
PPP1R3D	3.03709	2.53474	2.53474
BRD1	2.53474	3.70222	2.53474
POP4	3.07942	3.22609	2.53474
HERC2	3.43773	3.1437	3.24611
RAB3D	3.44782	3.38102	3.52687
SNAP29	3.50081	3.47466	3.50696
OXSR1	3.38124	3.36293	3.26288
GGPS1	3.54604	3.76566	3.65769
RAB36	3.48929	3.44973	3.54361
HSPA4L	3.48286	3.44768	3.51649
PTBP3	3.4766	3.61141	3.53712
TBC1D8	2.53474	2.53474	2.53474
IL33	3.58792	3.54447	3.57812
STARD3NL	3.57418	3.56287	3.56939
AP2A1	2.53474	2.53474	2.53474
WIZ	3.47775	3.57892	3.4887
STAU1	3.69002	3.80673	3.70613
TTC4	3.466	3.50085	3.40856
CAVIN2	2.53474	2.53474	2.53474
BAG2	3.64649	3.59079	3.59055
BAG3	3.60376	3.3744	3.56544
MAP4K4	3.61169	3.45326	2.53474
MLYCD	3.87749	3.91222	3.79123
CRYZL1	3.53783	3.3208	3.22744
AIFM1	3.30887	3.45879	3.27976
CLDN1	3.42466	3.42387	3.34124
CLIC3	3.40152	3.35068	3.51459
EML2	3.7837	3.84489	3.67575
LATS1	3.51496	2.53474	3.38183
GNA14	2.53474	3.41192	2.53474
NUDT14	3.61212	3.55723	3.68953
TSPAN15	3.29813	3.39739	3.25106
BPNT1	2.53474	2.53474	3.48692
FADS2	3.43766	3.51077	3.53325
DDAH2	3.4691	3.66537	3.82039
MPIG6B	3.41306	3.39773	3.44347
ABHD16A	3.52041	3.73135	3.64789
C6orf47	3.50632	3.46694	3.85997
TXNDC12	2.53474	2.53474	2.53474
OLFM2	3.25416	3.43056	3.52548
TRUB2	3.33313	2.53474	3.47559
ECD	3.69747	3.79904	3.68451
SYF2	2.53474	2.53474	2.53474
EFEMP2	3.47536	3.44657	3.49783
IGSF6	3.43859	3.38944	2.53474
RECK	3.34955	2.53474	3.34426
MBD3	3.33326	3.39015	2.53474
TOP3B	2.53474	2.53474	2.53474
NUDT3	2.53474	2.53474	2.53474
AGR2	3.5585	3.51523	3.52746
IL18BP	3.46781	3.46805	3.47279
BCL10	2.53474	2.53474	3.36176
NDUFB10	3.89215	3.97081	4.12654
CLPTM1	2.53474	2.53474	2.53474
MOCS2	3.6025	3.57208	3.56507
TOMM40	3.86831	3.81614	3.82551
NAPSA	3.3349	3.49289	3.49656
PEX11B	2.53474	3.34708	3.27405
PAK4	3.90565	4.00295	3.93176
WNT11	2.53474	3.75829	2.53474
CHEK2	3.59127	3.73954	3.63219
APBA3	3.48417	3.48908	3.48888
ACTL6A	3.37199	3.40883	2.53474
CCNE2	3.46609	3.50253	3.66169
NSD2	3.30225	3.29394	3.20929
MT-CYB	3.81592	3.66438	3.6577
CYB5A	2.53474	2.53474	2.53474
ADH1B	3.40689	3.32371	3.38667
ADH1C	4.01948	3.98462	4.02412
LDHA	3.45913	3.79136	3.60597
ALDH1A1	2.53474	2.53474	2.53474
GLUD1	2.53474	2.53474	2.53474
DHFR	3.85131	3.81917	3.788
CYB5R3	3.87137	3.75938	4.06325
GSR	3.79339	3.65109	3.65151
MT-CO1	3.51561	3.44799	3.70645
SOD1	3.57814	3.56633	3.46638
CP	3.8684	3.90935	3.867
F13A1	3.16578	3.2377	3.28849
PNP	3.83868	3.86513	4.01076
HPRT1	3.263	3.57551	2.53474
GOT2	3.41663	3.56569	3.3021
ABL1	3.78034	3.72647	3.89875
EGFR	3.77661	3.65162	3.6667
PGK1	3.97105	4.00429	3.90433
AK1	3.51952	2.53474	2.53474
F2	3.45417	3.26564	3.40898
C1R	4.00118	3.92091	3.87934
HP	3.60636	3.64764	3.70723
HPR	2.53474	2.53474	2.53474
F9	2.53474	3.51158	2.53474
F10	2.53474	3.51522	2.53474
PLG	2.53474	2.53474	2.53474
F12	3.67131	3.80296	3.55085
PLAU	2.53474	2.53474	2.53474
PLAT	2.53474	2.53474	2.53474
CFB	2.53474	2.53474	2.53474
ADA	3.54804	3.50352	2.53474
CA1	2.53474	3.15285	2.53474
CA2	3.75625	3.32876	3.28262
ASS1	3.4737	3.86446	2.53474
OAS1	2.53474	2.53474	2.53474
SERPINC1	2.53474	2.89802	3.85393
SERPINA1	3.76179	3.82248	3.55475
SERPINA3	3.39889	2.53474	2.53474
AGT	3.69684	3.61432	3.39028
A2M	2.53474	2.53474	2.53474
C3	2.53474	3.64987	2.53474
C5	2.53474	2.53474	2.53474
TIMP1	3.54219	3.48556	2.53474
CST3	3.47071	3.55444	3.405
CSTA	2.53474	2.53474	2.53474
KNG1	2.53474	3.53355	2.53474
FOS	3.41902	3.54147	3.46652
NRAS	3.52911	2.53474	3.50891
HRAS	2.53474	2.53474	2.53474
KRAS	2.53474	2.53474	2.53474
LDLR	2.53474	2.53474	3.64243
EGF	3.59117	3.55118	3.46589
TGFA	3.57102	3.55289	3.58745
TGFB1	3.40935	3.50255	3.36393
GNRH1	2.53474	3.38302	2.53474
IL1A	2.53474	2.53474	2.53474
IL1B	2.53474	2.53474	2.53474
JCHAIN	2.53474	2.53474	2.53474
IGKV1-5	3.36946	2.53474	2.53474
IGKV3-20	2.53474	2.53474	2.53474
IGLV1-47	2.53474	2.53474	2.53474
IGLV1-40	2.53474	2.53474	2.53474
IGLV2-14	2.53474	2.53474	2.53474
IGLV3-19	2.53474	2.53474	2.53474
IGLV3-1	2.53474	2.53474	2.53474
IGLV6-57	2.53474	2.53474	2.53474
CD4	2.53474	2.53474	2.53474
CD8A	2.53474	2.53474	2.53474
IGHV1-69	2.53474	2.53474	2.53474
IGHV1-46	2.53474	2.53474	2.53474
IGHV3-7	2.53474	2.53474	2.53474
PIGR	2.53474	2.53474	2.53474
IGKC	2.53474	2.53474	2.53474
IGHG1	2.53474	2.53474	2.53474
IGHG2	2.53474	3.52748	2.53474
IGHG3	2.53474	2.53474	2.53474
IGHG4	2.53474	2.53474	2.53474
IGHM	2.53474	2.53474	2.53474
IGHA1	2.53474	2.53474	2.53474
IGHA2	2.53474	2.53474	2.53474
IGHD	2.53474	2.53474	2.53474
HLA-B	2.53474	2.53474	2.53474
HLA-DRA	2.53474	2.53474	2.53474
HLA-DQA1	2.53474	2.53474	2.53474
HLA-DRB1	3.37163	3.13532	3.42436
HLA-DQB1	2.53474	2.53474	2.53474
HBZ	2.53474	2.53474	2.53474
HBD	2.53474	2.53474	2.53474
MB	2.53474	2.53474	2.53474
COL1A1	2.53474	2.53474	2.53474
COL3A1	2.53474	2.53474	2.53474
COL4A1	2.53474	3.30176	2.53474
CRYAB	2.53474	3.45605	2.53474
KRT14	2.53474	2.53474	2.53474
KRT6A	3.49511	3.49867	3.46983
LMNA	2.53474	2.53474	2.53474
SPTA1	3.47183	3.5496	2.53474
APOA1	4.02656	3.93761	2.53474
APOE	3.88038	3.97889	3.89444
APOA2	2.53474	2.53474	2.53474
APOC1	3.93543	4.05742	3.92347
APOC2	3.60352	3.66736	3.62591
APOC3	2.53474	2.53474	2.53474
FGA	2.53474	2.53474	2.53474
FGB	2.53474	2.53474	2.53474
FGG	3.4662	3.66784	3.40432
MBP	2.53474	3.47089	2.53474
SLC4A1	3.59008	3.78758	3.62805
CRP	3.52976	3.71463	3.4404
APCS	3.45723	3.29886	3.39455
C1QA	2.53474	2.53474	2.53474
C1QB	2.53474	2.53474	2.53474
C1QC	2.53474	2.53474	2.53474
C9	2.53474	2.53474	2.53474
APOH	2.53474	2.53474	2.53474
LRG1	2.53474	2.53474	2.53474
FN1	3.34328	3.3602	2.53474
RBP4	2.53474	3.60288	2.53474
AMBP	2.53474	3.30013	2.53474
ORM1	3.42059	3.62912	3.50154
AHSG	2.53474	2.53474	2.53474
TTR	2.53474	2.53474	3.58817
ALB	2.53474	2.53474	2.53474
AFP	2.53474	2.53474	2.53474
GC	2.53474	2.53474	2.53474
PPBP	3.94186	4.06868	3.86795
TFRC	3.44101	3.59074	3.4411
TF	2.53474	2.53474	2.53474
LTF	2.53474	2.53474	2.53474
HPX	3.80796	3.87481	3.8361
FTL	3.6319	3.65101	3.7497
FTH1	2.53474	2.53474	2.53474
MT-ND1	3.43472	3.58449	3.2777
MT-ND2	3.36852	3.51277	3.52125
ANG	3.56312	3.55383	3.51244
KLKB1	3.77331	3.74964	3.74227
MMP1	3.75045	3.86698	3.69816
C4BPA	2.53474	2.53474	2.53474
VTN	2.53474	2.53474	2.53474
HMGCR	2.53474	3.17303	2.53474
CAT	2.53474	2.53474	2.53474
RAF1	3.8972	4.09057	3.89637
FUCA1	3.75514	3.75468	3.42891
PROC	3.385	3.27589	3.35216
ALDOA	3.65777	3.66845	3.54152
CSTB	3.62782	3.5428	3.62145
ANXA1	2.53474	2.53474	2.53474
APOB	4.00143	3.84787	3.9641
NR3C1	3.89394	3.88444	3.99043
PRNP	3.91862	3.76053	3.8463
SOD2	3.41603	3.49258	2.53474
LCAT	3.34719	3.35864	3.31785
OAT	3.39312	2.53474	2.53474
TK1	3.43686	3.64543	3.43581
HRG	2.53474	2.53474	2.53474
THY1	3.84975	3.73128	3.63742
A1BG	3.47826	3.42733	3.56816
CD74	2.53474	2.53474	2.53474
KRT6B	2.53474	2.53474	2.53474
KRT1	2.53474	2.53474	2.53474
S100B	2.53474	2.53474	2.53474
VWF	3.92785	3.62887	2.53474
SHBG	3.51798	3.5238	3.4677
TUBB4A	2.53474	2.53474	2.53474
GAPDH	2.53474	2.53474	2.53474
ASL	3.34943	3.39849	2.53474
IGKV1-16	3.50886	3.44067	2.53474
HLA-A	3.94095	3.96796	3.91934
HLA-DPB1	3.45979	3.48001	3.75264
ERBB2	3.60228	2.53474	2.53474
CAPNS1	3.72639	3.78352	4.00213
TP53	2.53474	2.53474	2.53474
HSPB1	2.53474	3.48147	3.15922
CYP1A1	3.6307	3.61424	3.62975
TYMS	3.69337	2.53474	2.53474
CYBB	3.92743	3.75422	3.72768
RPN1	3.53915	2.53474	2.53474
RPN2	3.31282	3.24599	3.51251
GNAI2	2.53474	2.53474	2.53474
SLC4A2	3.84906	3.91019	3.9006
ATP1A1	3.76239	3.86024	3.86376
ATP1B1	3.65309	3.69489	3.67779
ALDOB	3.27876	3.37338	3.70299
APP	3.78654	3.78811	3.8553
ARG1	3.7247	3.81187	3.91977
APOD	2.53474	2.53474	2.53474
ALDH2	3.35135	3.47386	3.37659
CYP17A1	2.53474	3.50185	2.53474
ITGB3	2.53474	2.53474	2.53474
ITGB2	3.74642	3.86356	3.86699
S100A8	2.53474	2.53474	3.27988
HMGN1	2.53474	2.53474	2.53474
SERPINB2	2.53474	3.62206	2.53474
SERPINE1	3.46515	4.02429	3.39607
SLC25A5	3.07496	2.87337	2.53474
SERPINA5	2.53474	2.53474	2.53474
SERPING1	2.53474	2.53474	2.53474
CFI	2.53474	2.53474	2.53474
ISG15	2.53474	2.53474	2.53474
MPO	3.43328	3.48411	2.53474
PCCA	2.53474	3.32115	2.53474
PCCB	3.58264	2.53474	2.53474
ALPL	2.53474	3.66796	2.53474
EIF2S1	3.49933	3.54719	3.39929
ICAM1	3.55914	3.60115	3.53568
RPLP1	2.53474	2.53474	2.53474
RPLP2	3.86992	3.80915	3.79811
RPLP0	3.53158	3.97826	3.33149
JUN	4.08416	4.08358	3.60415
FABP3	3.96212	3.95771	3.94735
POLR3D	3.9198	3.89692	3.93553
CLEC3B	3.38814	3.4828	3.27233
SSB	2.53474	2.53474	2.53474
SERPINA7	3.40845	2.53474	3.34341
SERPIND1	2.53474	2.53474	2.53474
TFAP2A	3.82861	3.77714	3.79154
ITGB1	3.42759	3.72202	3.35904
PRKCB	3.51827	3.56922	2.53474
KRT18	3.32255	3.45779	2.53474
KRT8	3.71236	3.81401	3.75309
CALB1	2.53474	2.53474	3.37183
MYL1	3.94116	3.8352	4.04467
COL5A2	3.97669	3.96366	4.09494
CD5	3.53598	2.53474	2.53474
UROD	3.35416	3.55392	2.53474
INSR	2.53474	2.53474	2.53474
LCK	2.53474	2.53474	2.53474
FYN	3.45903	3.26705	3.37941
BCHE	3.24341	2.53474	2.53474
GLA	2.99698	2.53474	2.53474
IGKV4-1	3.22497	3.09437	2.53474
IGHV4-34	3.40485	2.53474	2.53474
GSN	3.64674	3.69906	3.55361
RB1	2.53474	2.53474	2.53474
PTMA	2.53474	2.53474	2.53474
CDK1	3.70343	3.67241	3.55311
ATP5F1B	3.52011	3.36398	3.47477
C2	3.64617	2.53474	3.78712
S100A9	3.55132	3.56611	3.5948
S100A6	3.92136	4.00819	3.89961
APOA4	2.53474	2.53474	2.53474
CD2	3.5481	4.00737	2.53474
EIF4E	2.78748	2.53474	2.53474
CEACAM5	2.53474	2.53474	2.53474
CKM	2.53474	2.53474	2.53474
ENO1	3.54938	3.4946	3.53453
PYGL	3.44747	2.53474	3.85202
GPI	3.42629	3.60435	3.36209
POLB	4.01759	3.88237	3.94988
NPM1	3.73681	3.56615	3.45516
TPM3	3.85118	3.80441	3.88071
ITGAV	3.63498	3.49324	3.30738
HEXA	4.04003	3.99924	4.00323
KLK1	3.95007	3.9301	3.97166
EPHX1	3.62289	3.5683	3.52016
TH	3.79184	3.8252	3.80619
DBI	2.53474	2.53474	2.53474
FABP1	3.61456	3.93987	3.87645
LDHB	2.53474	2.98714	2.53474
NEFL	3.878	3.89876	3.88796
CENPB	2.53474	2.53474	3.51861
GPX1	3.87732	3.85343	3.82869
THBD	2.53474	2.53474	2.53474
PGK2	3.39135	3.36423	3.48272
PROS1	3.77621	3.72669	3.60472
P4HB	3.24129	3.39952	3.37961
H1-0	3.72943	3.55878	3.57436
ACYP1	2.53474	2.53474	2.53474
FES	3.88154	3.9954	3.91985
CSF1R	2.53474	2.53474	2.53474
CTSD	3.69072	3.66016	3.68746
ANXA2	2.53474	2.53474	2.53474
C8A	2.53474	2.53474	2.53474
C8B	3.76387	3.95096	3.72457
GP1BA	3.88136	3.85132	3.91405
C8G	2.53474	2.53474	2.53474
CAPN1	2.53474	3.35805	2.53474
TUBB	2.53474	2.53474	2.53474
CA3	2.53474	2.53474	2.53474
IVL	3.63301	3.57322	3.6402
CHRNG	3.94139	3.93079	4.00106
DCN	2.53474	2.53474	2.53474
PSAP	3.56226	2.53474	2.53474
HEXB	2.53474	2.53474	2.53474
CTSL	2.53474	2.53474	2.53474
PFN1	3.65658	3.70609	3.7102
BPGM	3.75869	3.69529	3.77094
APRT	3.35253	3.69023	3.41989
CD3E	4.05395	4.02712	4.04573
EPRS1	3.24406	3.24329	2.53474
CTSB	3.91589	3.89888	3.95963
HSP90AA1	3.70815	3.71199	3.72819
GALT	3.6621	3.65068	3.55698
HNRNPC	2.53474	2.53474	2.53474
LAMB1	3.95649	3.90135	3.99156
YES1	3.32247	3.23591	3.34389
LYN	3.9239	3.93097	3.94276
TPM2	3.94032	4.10076	3.82712
FH	3.55805	3.5568	3.54911
SFTPB	3.52521	3.62449	3.78174
ERCC1	2.53474	2.53474	2.53474
THBS1	3.7395	3.85998	3.72006
SP1	2.53474	3.21159	2.53474
IGF1R	3.37207	2.53474	3.37243
COL1A2	3.54368	3.56769	3.47037
ANXA6	3.16467	2.95076	3.05567
NGFR	3.30823	3.20704	3.45583
CD55	2.53474	2.53474	2.53474
SERPINA6	3.62982	3.65623	3.45887
SLC3A2	3.51132	3.29994	2.53474
GUSB	2.53474	2.53474	2.53474
PFKM	2.53474	2.53474	2.53474
HSP90AB1	4.04454	3.97308	3.93638
SRPRA	3.44357	3.42685	3.52497
ASNS	3.64697	3.5467	3.68159
ELANE	3.95735	3.86188	3.85017
SYP	3.62146	3.69865	3.65873
MMP2	3.75179	3.71351	3.94939
SOD3	2.53474	2.53474	2.53474
CTSG	2.53474	3.52039	2.53474
HMBS	2.53474	2.53474	2.53474
MME	2.53474	2.53474	2.53474
MGP	2.53474	2.53474	2.53474
ITGA2B	3.60206	3.41439	3.60896
LPA	3.32882	3.66583	2.53474
PDHA1	2.53474	2.53474	2.53474
PLEK	2.53474	2.53474	2.53474
CD14	2.53474	2.53474	2.53474
COL4A2	3.76764	3.85311	3.72721
CYC1	2.53474	2.53474	2.53474
PTPRC	2.53474	3.46872	2.53474
SNRPB2	3.55724	3.70901	3.57275
MET	3.58311	3.6384	3.58
MELTF	2.53474	2.53474	3.13003
CFH	3.54778	3.53906	3.48618
SNRNP70	3.43992	2.53474	3.45108
HCK	3.38943	3.26854	3.38312
ITGA5	2.53474	2.53474	2.53474
NFIC	3.79652	3.79201	3.71908
VIM	3.30136	2.53474	2.53474
SERPINF2	3.36533	3.40396	3.35785
RPS17	3.46334	3.60087	3.44857
F7	3.32012	3.66265	2.53474
KRT19	3.45292	3.58793	3.4327
KRT7	3.5686	3.65312	3.68293
GNAI3	2.53474	2.53474	2.53474
ANXA5	3.95527	3.97936	3.91639
KRT16	3.32099	4.05848	3.66991
STS	3.56503	3.63637	3.59415
RPSA	3.85585	3.90606	3.83817
CD63	3.66105	3.8398	2.53474
MRPL3	2.53474	2.53474	2.53474
SNRPA	3.78431	3.84529	3.78277
ENO2	3.46138	3.58742	3.70448
HBQ1	3.52736	3.54031	3.48015
ACAA1	3.65324	3.67965	3.61234
DBH	3.60584	3.44975	3.56447
GSTP1	2.53474	2.53474	2.53474
SNRPC	3.61586	3.76685	3.76766
MMP10	3.99024	3.92951	4.05524
CD48	3.88237	2.53474	2.53474
LGALS1	2.53474	2.53474	2.53474
QDPR	2.53474	2.53474	2.53474
HMGB1	2.53474	2.53474	3.86631
RBP1	3.54491	3.94693	3.83566
FBP1	3.52304	3.40231	3.61351
GNAO1	3.96449	3.86141	3.99909
SPARC	3.81493	3.56427	2.53474
GSTM1	3.28781	3.73226	3.19374
TPM1	3.40791	2.53474	2.53474
CLTA	3.87592	3.91113	3.84859
CLTB	2.53474	3.49496	2.53474
ANXA4	3.43529	3.27863	3.33045
INHBB	3.73203	3.72217	3.64003
CNP	3.62707	3.60787	3.60604
WNT2	3.66619	3.61776	3.96565
HMOX1	2.53474	3.52612	2.53474
CSF1	3.52539	3.60494	3.6276
PDGFRB	2.53474	2.53474	2.53474
DLD	3.36579	3.62118	3.60698
HNRNPA1	2.53474	2.53474	2.53474
SNRPA1	2.53474	2.53474	2.53474
CTSH	3.59534	3.69934	3.64622
COX6C	3.60208	3.55222	3.62109
CD3G	3.86827	3.85565	3.8578
TACSTD2	3.44442	3.42991	3.50859
FGR	3.51188	2.53474	2.53474
C1S	2.53474	2.53474	2.53474
PARP1	3.82971	3.74558	3.56822
POLA1	2.53474	2.53474	2.53474
IFIT2	2.53474	3.40436	2.53474
IFIT1	3.74839	3.74688	3.69111
ALOX5	3.34929	3.17294	3.37591
ALPI	2.53474	2.53474	2.53474
UCHL1	2.53474	2.53474	2.53474
FURIN	2.53474	2.53474	2.53474
LTA4H	2.53474	2.53474	2.53474
ALDOC	3.85091	3.97293	3.91821
C4A	2.53474	2.53474	2.53474
TFPT	3.86049	3.76197	3.83933
CCDC175	3.60786	3.69277	3.50643
FBXO45	2.53474	3.31953	2.53474
ATXN1L	3.27615	3.37242	3.36013
ZDHHC11B	3.32084	2.53474	2.53474
JMJD7	3.40516	3.3915	3.37415
POLR2M	2.53474	2.53474	2.53474
SAA1	2.53474	2.53474	3.45275
SAA2	3.60016	3.59833	3.55652
POLR1D	2.53474	2.53474	2.53474
FDX1	3.79508	3.71253	3.73894
RAP2A	2.53474	2.53474	2.53474
RNASE2	2.53474	2.53474	2.53474
RO60	2.53474	2.53474	2.53474
COX8A	3.53233	2.53474	3.41169
GAA	2.53474	2.53474	2.53474
AR	3.508	3.57921	3.43628
RRAS	3.54964	3.6089	3.53242
HLA-C	3.75365	3.77426	3.61036
ARAF	2.53474	3.20171	2.53474
H1-4	3.39425	3.53463	3.74806
SPP1	3.70715	2.96088	3.42366
DLAT	3.49214	3.60963	3.3598
SAG	3.82191	3.44138	3.87019
PTPRF	3.42972	3.70395	3.32932
NR2F6	3.80176	3.90323	3.85861
TXN	2.53474	2.53474	2.53474
TGFB3	3.46376	3.50824	3.43411
COX5B	3.34294	3.37071	3.32852
CTSA	3.89945	3.89037	3.90427
MGST1	2.53474	3.4248	2.53474
MAPT	3.79774	3.87478	3.71454
C7	3.51811	3.65385	3.55257
PRKAR1A	3.71571	4.09802	3.82773
KIT	2.53474	3.43	3.34055
UROS	2.53474	3.54125	2.53474
ESD	3.53908	3.65335	3.50631
HSPD1	2.53474	2.53474	2.53474
CLU	2.53474	2.53474	2.53474
IRF1	3.88538	3.67288	3.75366
MYL2	3.83806	3.84292	3.80593
HSPA5	3.54111	4.0132	3.59496
LAMC1	2.53474	3.33786	2.53474
MYH3	2.53474	2.53474	2.53474
ACP2	3.98731	4.02318	3.9759
MAP2	3.73142	3.8567	3.70259
HSPA8	3.29246	3.28577	2.53474
SLC2A1	3.45684	3.50649	3.36859
SLC2A3	3.57743	3.47808	3.32873
EPB41	4.0244	4.00181	4.03197
UMPS	4.03899	3.94502	3.85007
PDHB	2.53474	3.56566	2.53474
DBT	3.51404	3.50022	3.64762
ITGAM	3.65765	3.687	3.69475
PYGB	3.68244	3.75751	3.64192
PYGM	3.66309	3.67121	3.68052
MBL2	2.53474	3.36596	2.53474
CHRM1	3.82393	3.71167	3.65117
CHRNB1	3.34528	3.36879	2.53474
RALA	2.53474	2.53474	2.53474
RALB	2.53474	2.53474	2.53474
BCR	2.53474	2.53474	2.53474
SPTB	3.85546	3.89709	3.93449
LAMP1	3.55735	3.63725	3.60641
ERG	3.3732	3.41503	3.44623
ACADM	2.53474	2.53474	2.53474
FGFR1	3.75045	3.66919	3.73885
TOP1	2.53474	3.31863	2.53474
TOP2A	3.7247	3.75965	3.6313
G6PD	2.53474	2.53474	3.33004
UBL4A	3.80975	3.79084	3.76924
ESRRA	3.7138	3.70026	3.73454
GNAT1	4.02843	4.08216	3.94367
PC	3.53436	3.5712	3.59192
CYP2A6	3.18268	3.32762	2.93465
CYP19A1	2.53474	2.53474	2.53474
DMD	3.60086	3.65878	3.39417
MTHFD1	2.53474	2.53474	2.53474
CETP	3.53999	2.53474	2.53474
EPX	3.40122	2.53474	3.36221
SCGB1A1	3.75564	3.72771	3.81398
SFTPC	2.53474	2.53474	2.53474
IGF2R	3.56123	3.78924	3.62497
ADH5	2.98348	2.53474	2.53474
CDK4	2.53474	2.53474	2.53474
MS4A1	3.64882	3.73421	3.58715
PRPS2	3.66737	3.5224	3.64623
PABPC1	3.4177	3.40527	3.37903
PCNA	2.53474	2.53474	2.53474
KRT3	3.59957	3.51588	3.45897
COX6A1	3.86719	3.77855	3.83629
HARS1	3.84522	3.72181	3.90025
COL6A1	2.53474	2.53474	3.63051
COL6A2	3.84522	3.81067	3.78146
COL6A3	3.72613	3.65727	3.69941
SLC25A4	3.28133	3.43915	3.39891
SLC25A6	3.44824	3.59397	3.46312
F5	3.36376	3.48011	2.53474
IMPDH2	3.93625	4.08513	3.95737
TPR	3.58294	2.53474	2.53474
PTHLH	3.45426	3.71642	3.44748
PIP	3.85187	3.79041	3.86629
CKB	3.59612	3.63162	3.56431
FCGR1A	3.1222	2.53474	2.53474
ANXA3	2.53474	3.4325	2.53474
CKMT1B	3.69305	3.88149	3.81169
BMP3	2.53474	2.53474	2.53474
BCKDHA	3.45398	3.50887	3.66592
RNASE3	3.8634	3.97471	3.82716
SKI	2.53474	2.53474	2.53474
SKIL	3.50288	3.53329	3.56893
ACTN1	2.53474	2.53474	2.53474
ACE	3.32356	2.53474	3.32233
MYL4	3.35847	2.53474	2.53474
CDH1	3.61164	3.60296	3.61583
MYH7	2.53474	2.53474	3.33452
SRC	2.53474	2.53474	2.53474
PEPD	3.81901	3.77001	3.84744
XRCC6	2.53474	2.53474	2.53474
XRCC5	3.60497	3.4188	3.75001
UNG	3.513	2.53474	3.65585
NR2C1	3.79768	3.80217	3.87154
COX4I1	3.68191	3.67646	3.78137
ALAS1	3.60675	3.60082	3.58179
GP1BB	2.53474	2.53474	3.36888
IFI30	3.91567	3.89045	3.90268
LAMP2	3.37353	3.3167	3.55007
RNH1	2.53474	2.53474	2.53474
BMP1	3.52752	3.70916	3.07892
CYBA	3.69163	3.65735	3.4507
CCL2	3.9212	3.79092	3.82913
MYH8	3.5885	2.53474	2.53474
CYP4B1	3.47534	3.6541	3.61742
ICAM2	2.53474	2.53474	2.53474
VCAN	2.53474	2.53474	2.53474
ITGA4	2.53474	3.61925	2.53474
RARG	2.53474	2.53474	2.53474
ATP1A3	2.53474	2.53474	2.53474
EEF2	2.53474	2.53474	2.53474
KRT10	2.53474	2.53474	2.53474
KRT13	2.53474	2.53474	3.61415
KRT5	3.92164	3.91847	3.939
PDIA4	3.3216	3.41524	3.30077
C6	3.62166	3.47927	2.53474
P4HA1	3.85177	3.93193	2.53474
ZNF35	3.81963	3.87155	3.92381
ACP5	2.53474	2.53474	2.53474
TPT1	3.73004	3.74919	3.8466
ALAD	2.53474	2.53474	2.53474
F3	2.53474	2.53474	2.53474
PRG2	3.74787	3.6516	3.71288
HLA-E	3.37802	3.41604	3.44995
HLA-DRB4	3.60471	3.32812	3.1828
LCP1	2.53474	2.53474	2.53474
PLS3	3.4308	2.53474	3.32915
APEH	2.53474	2.53474	2.53474
ETFA	3.54643	4.01496	3.52358
TNNT1	3.59189	3.71323	3.69803
GYS1	3.55244	3.42593	3.67278
PRKAR2A	3.84915	3.95649	3.91495
ANXA8	2.53474	2.53474	2.53474
ENO3	3.56974	3.57037	3.53103
GTF2F2	3.44053	3.45836	3.38279
YJU2B	3.42968	2.53474	2.53474
MTHFD2	3.58849	3.48878	2.53474
CTSE	3.48782	3.3441	3.41488
SELL	2.53474	3.33305	2.53474
MIF	3.7157	3.72502	3.77824
FOLR2	2.53474	2.53474	2.53474
CD99	2.53474	2.53474	2.53474
PRF1	3.50332	3.52844	3.72504
PRKCSH	2.53474	2.53474	2.53474
IRF2	3.42042	3.41636	2.53474
HCLS1	2.53474	2.53474	2.53474
FDPS	3.83847	3.92136	3.82547
TRIM27	2.53474	2.53474	2.53474
CPM	3.32458	2.53474	2.53474
COX7A2	3.59713	3.79593	3.71919
NID1	3.43357	3.3081	3.43499
AKR1A1	2.53474	2.53474	2.53474
PKM	3.92914	3.9728	3.88618
ACYP2	3.67644	3.96675	3.59055
HSP90B1	3.67309	3.68536	3.68788
CCNB1	3.88996	3.85016	3.94139
MYL6B	3.49662	3.45241	2.53474
SNRPB	3.85543	3.95187	3.92108
IDE	3.27487	3.23922	3.28684
GP9	3.49175	3.37492	3.34686
MMP9	2.53474	3.52644	2.53474
POU2F1	3.53646	3.51659	3.54557
HNRNPL	2.53474	2.53474	2.53474
DARS1	2.53474	2.53474	2.53474
IDO1	3.31866	3.20208	3.27152
ETS1	3.87735	3.86553	3.82557
JUP	3.78979	3.78249	3.79923
UQCRB	2.53474	2.53474	2.53474
ETS2	2.53474	2.53474	2.53474
BRAF	3.71982	3.77066	3.73052
CPA3	3.76133	3.76949	3.76482
FABP4	2.53474	2.53474	2.53474
GLUL	2.53474	2.95476	2.53474
AKR1B1	2.53474	2.53474	2.53474
ANPEP	2.53474	2.53474	2.53474
PVR	3.50844	3.62512	3.31851
CPN1	3.73783	3.91393	3.73178
GSPT1	2.53474	3.3127	2.53474
MYOD1	3.47986	3.488	3.42722
IFNGR1	3.42128	3.65823	3.30049
ARSA	3.70412	3.5587	3.71262
B4GALT1	2.53474	2.53474	2.53474
ACP3	3.34171	3.52028	3.42783
EZR	3.56856	3.51153	3.37946
ATP6V1B1	3.19875	3.34786	3.45105
ATF2	3.43123	3.4009	2.53474
UCHL3	3.74115	3.66396	3.78693
FOSL1	2.53474	3.58975	2.53474
FOSL2	3.39809	3.34317	3.38368
HPGD	3.66506	3.54314	3.62234
VAV1	2.53474	2.53474	2.53474
ELN	3.49521	3.31706	3.19904
CSF2RA	2.53474	3.3855	2.53474
CD46	2.53474	2.53474	2.53474
NME1	2.53474	2.53474	2.53474
NQO1	2.53474	2.53474	2.53474
GNS	3.66332	3.64659	3.67846
PHKG2	3.81409	3.83211	3.79798
HIVEP1	3.95232	4.16073	4.13049
ARSB	3.76427	3.80342	3.70565
RPS2	3.57572	3.44405	3.43391
ST6GAL1	2.53474	2.53474	2.53474
TCF3	3.4466	2.53474	2.53474
DSP	3.94627	3.95633	3.96456
RPA2	2.53474	3.27564	2.53474
MUC1	3.37469	2.53474	2.53474
COX7C	3.76939	3.7336	3.83543
TIMP2	3.64839	3.46655	3.64977
ALOX15	2.53474	3.77469	3.7912
NPR1	3.90661	3.95883	3.91851
CD44	2.53474	2.53474	2.53474
NQO2	3.47572	2.53474	3.49058
SELP	2.53474	2.53474	2.53474
PFKFB1	3.63471	3.80202	3.6374
ITGB4	2.53474	3.31037	2.53474
CBR1	2.53474	2.53474	2.53474
ANK1	3.68348	3.57512	3.66909
ACADS	2.53474	2.53474	2.53474
CREB1	3.82187	3.86581	4.01404
PDGFRA	3.43857	3.3283	2.53474
SLC25A16	3.54762	3.58478	3.70206
GLB1	3.72556	3.66216	3.66129
PECAM1	2.53474	2.53474	2.53474
PPP3CB	2.53474	3.42642	3.54894
NCK1	3.64059	3.75157	3.72349
GCFC2	2.53474	2.53474	2.53474
H1-5	3.47863	3.54175	3.45451
H1-3	3.52771	3.45422	3.48034
H1-2	3.31366	3.33728	3.42167
EPCAM	2.53474	3.74453	3.92375
POR	3.64212	2.53474	3.5604
ABO	2.53474	2.53474	3.6647
DPEP1	3.83342	3.84061	3.97758
EPB42	3.57693	3.756	3.67139
MGMT	2.53474	2.53474	2.53474
FER	2.53474	2.53474	2.53474
ATP2A2	2.53474	2.53474	2.53474
CD36	3.38129	2.53474	2.53474
CPE	2.53474	2.53474	2.53474
PLCG2	3.76068	3.86737	3.82385
FAH	2.53474	3.76451	2.53474
STMN1	2.53474	3.1873	2.53474
YBX3	3.41432	3.33277	3.35551
ZNF24	3.59928	3.59365	3.56315
ZKSCAN1	3.93881	3.78777	3.94222
ZSCAN20	3.61424	3.46727	3.48643
NAGA	2.53474	3.43806	3.43447
RHOQ	3.30738	3.34658	3.46138
HMGA1	2.53474	2.53474	2.53474
ZNF8	3.67067	3.64404	3.67195
TMEM11	2.53474	2.53474	2.53474
GOT1	3.91778	3.83073	3.90502
IFNAR1	2.53474	2.53474	2.53474
BPI	3.47786	3.61879	3.39131
PRKCA	3.82488	3.667	3.64737
JUNB	2.53474	2.53474	2.53474
ITGA2	2.53474	2.53474	2.53474
GJA1	3.4653	2.53474	3.54849
NPR3	3.4782	3.43476	2.53474
SMPD1	3.45253	3.54792	3.5455
UBTF	3.32403	3.44885	2.53474
JUND	2.53474	2.53474	2.53474
ATF7	2.53474	3.6336	2.53474
NDUFB7	3.51697	3.54118	3.56547
PRKACA	3.33722	3.23918	2.53474
CAPN2	2.53474	2.53474	3.25834
DES	3.44317	3.46223	3.42763
CEBPB	3.47929	3.59559	3.35954
PTPN2	3.55327	3.58707	3.56307
AMD1	2.53474	2.53474	2.53474
CTPS1	3.59525	3.71697	3.46022
ENG	3.45689	3.53543	3.49429
DDX5	3.38925	3.39052	2.53474
PFKL	3.72187	3.65498	3.75419
GM2A	2.53474	2.53474	2.53474
CR1	3.89623	3.87733	3.91322
LGALS3	3.65248	3.71949	3.81542
IGFBP3	3.47144	2.53474	2.53474
FLT1	2.53474	2.53474	2.53474
PSMC3	3.62082	3.6467	3.74029
TCP1	2.53474	3.67945	3.69738
PTPN1	2.53474	2.53474	2.53474
IGFBP2	3.76563	3.77214	3.8053
ERCC2	3.83745	3.85286	3.76724
BMP7	3.63284	3.67683	3.60074
RPL35A	3.44035	3.48632	3.4981
ITGB5	3.4095	3.42562	3.46434
ARF4	3.55255	3.48077	2.53474
RPL7	3.87155	3.91459	3.91197
EGR1	3.37194	3.40728	3.44191
VCL	3.7849	3.81878	3.84951
GPX2	3.95001	3.94157	3.9225
LBP	3.36894	2.53474	2.53474
PTPRA	3.64147	3.63099	3.7457
NAT1	3.7057	3.70485	3.86276
IL1RN	2.53474	3.71801	2.53474
ITGB6	3.40462	3.46334	3.45092
SON	3.41104	3.46333	3.40624
NELFE	3.25533	2.53474	2.53474
RPL17	3.36047	3.36008	2.53474
PGAM1	3.54356	3.5965	3.58696
RCC1	3.43334	3.29918	3.43589
SDC1	3.87085	3.83459	3.86037
ATF6	3.80861	3.67536	3.67396
LIG1	3.70026	3.6085	3.7383
ATP5PF	3.64871	3.41797	3.41096
XRCC1	2.53474	3.32761	3.43536
KRT15	3.3933	3.37645	3.47785
KRT4	3.78932	3.84072	3.7488
PAM	3.59143	3.60136	3.63241
CDH2	3.50742	3.3507	3.05607
TSPAN8	3.61671	3.41886	3.57308
PLCG1	3.33463	2.53474	2.53474
UGT1A6	3.39011	2.53474	2.53474
CD58	2.53474	2.53474	3.80729
VCAM1	3.33412	3.23503	3.36848
NCL	3.6082	3.72608	4.11183
HK1	3.60939	3.51172	3.47118
POLR2C	2.53474	2.53474	2.53474
POLR2E	4.02215	3.98189	4.07238
NDUFV2	3.80138	3.92342	3.79347
ERCC3	3.6325	3.62093	3.59276
TRIM21	3.49636	3.46775	3.47954
TFEB	3.80386	3.80349	3.76785
EIF2AK2	3.5013	3.52062	3.46476
SRM	3.48571	2.53474	3.4207
SLC9A1	2.53474	3.13979	2.53474
ORM2	3.72354	3.64541	3.60847
CSNK2A2	3.72809	3.7505	3.83707
RXRA	3.35535	2.53474	3.32047
ITIH2	3.61244	3.53245	3.59338
ITIH1	3.53316	3.58602	3.43228
CEL	2.53474	2.53474	3.4003
NFKB1	3.82197	3.88725	3.63592
NCF2	2.53474	3.53855	2.53474
FST	3.51437	3.81583	2.53474
TYMP	3.34663	3.31834	3.41583
ATP2B1	2.53474	2.53474	2.53474
HLA-DPA1	2.53474	2.53474	2.53474
EIF2S2	3.37613	3.42288	3.39838
TCN1	3.6266	3.60595	3.52262
ANXA7	2.53474	2.53474	2.53474
SDS	3.70329	3.62989	3.65979
CD33	2.53474	2.53474	2.53474
AZU1	3.79443	3.82641	3.86437
TBP	2.53474	2.53474	2.53474
CCNA2	2.53474	2.53474	2.53474
BTF3	2.53474	2.53474	2.53474
ALOX5AP	3.5476	3.55096	2.53474
RAB3A	3.31129	3.32817	3.35752
RAB3B	3.28793	3.23164	3.27002
RAB4A	2.53474	3.60557	2.53474
RAB5A	3.39045	3.45296	3.25107
RAB6A	3.4078	3.14807	3.5398
MSH3	3.46951	3.57431	3.53648
MX1	3.60136	3.64234	3.63533
MX2	3.89101	3.85596	3.81955
[truncated: 7,805 more rows]
