# Supplementary material for: Lung tumoroids as a testing platform for precision CAR T-cell therapy
Source: Research Square preprint supplement (doi:10.21203/rs.3.rs-5418471/v1), 2025-01-16
Supplement: Supplementary file 2 [file 3c4410e7f579730e1e26cba9.xlsx]

## Sheet: Supplementary Table 4_I
NSCLC gene subset	NSCLC Protein Atlas gene subset	Chemoresistance gene subset	Epithelial GO Terms	Cancer Hallmark GO Terms
SPP1	ZNF512	TNFRSF10A	GO:0001837	GO:0008283
CCNB2	MOAP1	MEN1	GO:0005938	GO:0007049
COL3A1	HLF	PGRMC1	GO:0016337	GO:0051301
CDC20	FAM117A	CLIC1	GO:0005911	GO:0030307
CCNB1	SLC11A2	WWP2	GO:0009880	GO:0045786
CDKN3	RRAGB	CDC7	GO:0007047	GO:0008284
AURKB	TMEM168	IGF2BP3	GO:0007162	GO:0045787
MIF	MYLIP	PIK3R2	GO:0048771	GO:0009968
TYMS	ZNF77	BIN1	GO:0030855	GO:0045786
ASPM	TTC39B	RNASET2	GO:0060429	GO:0008285
MCM2	THYN1	PODXL	GO:0048729	GO:0030308
CEP55	ANKRD65	PDXK	GO:0002009	GO:0012501
BUB1B	DBP	ARID1A	GO:0001838	GO:0043067
KIAA0101	GNG7	BHLHE40	GO:0001755	GO:0043069
MMP11	INPP5J	SDHD	GO:0009887	GO:0032200
PTTG2	MARCHF9	DVL2	GO:0045184	GO:0001302
MMP1	SMIM4	ADAM10	GO:0045165	GO:2000772
MYBL2	SLC47A1	APAF1	GO:0007047	GO:0000723
TK1	CA11	CHEK1	GO:0009986	GO:0032204
AURKA	PPFIBP2	TNFRSF10B	GO:0030154	GO:0090398
FOXM1	RFXAP	IKBKB	GO:0005923	GO:0001525
FEN1	NSMCE4A	AURKA	GO:0030855	GO:0001570
IGFBP3	TMEM38A	SLC27A2	GO:0060429	GO:0045766
UHRF1	LRIG1	XPO1	GO:0007423	GO:0034330
KIF14	CLIC6	PER2		GO:0030030
TTK	ARV1	CHUK		GO:0030155
LOXL2	CERS4	MAPK13		GO:0007162
CDCA8	ADCK1	TP73		GO:0007155
KIF11	USP4	FANCA		GO:0016477
CDC2	KRBOX4	HDAC3		GO:0001837
NDC80	ZNF2	BIRC5		GO:0045005
CDC45L	CXCL17	SLC31A1		GO:0031570
CCNA2	TMEM125	ABCC3		GO:0006281
ANLN	RCBTB1	ABCC4		GO:0006282
MDK	FMO3	ABCC5		GO:0002367
MMP9	ELAPOR1	CFLAR		GO:0050727
BIK	GPD1L	MAFG		GO:0071456
NCAPH	RCOR3	PDPK1		GO:0006096
HMMR	JPH1	CLDN3		GO:0002418
CKS1B	ANKRD29	PHGDH		GO:0006955
GMNN	DTNBP1	PAPSS1		GO:0002837
PAK1	C12orf76	DAPK3		GO:0050776
COL7A1	ZNF589	MAP3K7
CCT5	ARMCX5	TXNL1
FAP	UNC13B	HTRA2
TMPRSS4	TIA1	KLF4
TIMP1	PPP3CC	PROM1
SLC6A4	EPHX1	RAD51C
SPTBN1	SEPTIN1	LAMTOR5
KL	ERO1B	BCL2L11
GDF10	PCP4L1	FOXO3
TEK	ACSS1	XRCC3
CDH5	PATZ1	RGS10
CCBE1	PLPP5	ACTN4
RGN	HES6	PRKAB2
FOXF1	DGLUCY	AKR1B10
WFDC1	GSTM2	PPL
DACH1	ZNF248	NRP2
CLIC3	FMC1	DOK2
DMN	RABGAP1L	NBN
ITGA8	BDH2	ERN1
CENTD3	GPR160	PRKRA
CD97	FAM104B	RAD51D
TPR	DENND1C	EIF3G
SPI1	HPS1	ARL6IP5
LPHN2	MPC1	RECQL4
MMP28	BEND5	URI1
MFAP4	FDCSP	USP1
ESAM	PLPPR1	ATG12
CD93	ZFP3	DKK1
DRAM	PPP1R13B	ABCA8
FAT4	RIMKLA	GLS
ZBTB16	KLHDC8B	UBR5
ROR1	OTUD5	LUC7L3
TENC1	MBIP	KIF20A
TBX2	BEX2	ATG7
ABCA3	RNPC3	ZBTB7A
LTBP2	MPND	TNFAIP8
CTNNAL1	CHADL	CLDN7
ROS1	NPRL2	H6PD
ICAM5	CAMK1D	BAG3
SELP	GGA2	AIFM1
FLRT3	PNMA2	CLDN1
MMP19	THRA	LATS1
	PHKG2	TOP3B
	LIFR	NAPSA
	GLB1L3	CHEK2
	STOX1	ALDH1A1
	WDR83OS	DHFR
	ZNF394	GSR
	PCMTD2	MT-CO3
	ROM1	SOD1
	NFIX	ABL1
	GUCY1A1	EGFR
	ACAD8	PGK1
	VCPKMT	ASS1
	ABCA4	FOS
	CIRBP	NRAS
	MCOLN2	KRAS
	ZNF557	LDLR
	RMDN2	EGF
	COA5	TGFB1
	GDAP1	IL1A
	SGSH	IL1B
	TCEAL4	CD8A
	HMGN3	COL1A1
	RGMA	COL3A1
	NUDT16L1	CRYAB
	ASAP3	FN1
	PRAF2	TFRC
	SPINK2	HMGCR
	CCDC88C	ALDOA
	NVL	SOD2
	IP6K2	KRT1
	GDPD1	S100B
	ADH1C	ERBB2
	CPED1	CAPNS1
	NDUFAF7	TP53
	SRI	HSPB1
	BEX5	ATP1A1
	PPP1R3E	ATP1B1
	SLC7A8	SERPINB2
	PNMA5	SERPINE1
	XCL2	EIF2S1
	ZSCAN16	ICAM1
	BCDIN3D	JUN
	ZNF688	ITGB1
	SHISA2	PRKCB
	TMEM50B	KRT18
	IRX6	KRT8
	GCDH	LCK
	SGF29	GSN
	CHD6	RB1
	TSPAN11	S100A9
	ANGEL1	EIF4E
	IKZF4	ENO1
	PLEKHG4B	POLB
	GPC4	NPM1
	ELF5	P4HB
	IQCB1	CSF1R
	NKIRAS1	ANXA2
	SS18L1	CAPN1
	RSBN1L	HSP90AA1
	CDH26	FH
	SELENOK	ERCC1
	TNFRSF19	THBS1
	PXMP4	IGF1R
	TRMT10B	CD55
	JAML	SLC3A2
	AMOT	HSP90AB1
	SIX1	MMP2
	ZDHHC11B	MME
	TCEAL3	MET
	SLC25A42	ITGA5
	CCDC121	VIM
	ALDH6A1	RPSA
	FAM210B	GSTP1
	TTC28	MMP7
	RGL1	MMP10
	GGT6	HMGB1
	ZNF266	SPARC
	MYCL	GSTM1
	NEK8	ANXA4
	SPRYD4	HMOX1
	ENPP5	CSF1
	IRX5	PDGFRB
	HLA-DMA	PARP1
	MFSD4A	UCHL1
	DOK1	SPP1
	WASHC2C	TXN
	ABHD14A	TGFB3
	MERTK	PRKAR1A
	ZCWPW1	KIT
	FBXO33	HSPD1
	CD99L2	CLU
	ZKSCAN4	IRF1
	TBC1D30	HSPA5
	LGR5	SLC2A1
	EXPH5	TOP1
	ATAD3C	TOP2A
	ING4	G6PD
	PTPN4	IGF2R
	TOX	CDK4
	PI4KA	PCNA
	SARAF	COL6A3
	KBTBD7	ANXA3
	PDE6B	CDH1
	DGCR6L	SRC
	BCLAF3	XRCC6
	RASL11A	XRCC5
	SELENOW	UNG
	TMEM243	CCL2
	DMAC2L	KRT10
	GCHFR	KRT5
	DAPK2	TPT1
	IQCC	FOLR2
	PXK	TRIM27
	LIPT1	COX7A2
	ZNF3	NID1
	DCAF16	PKM
	CCR2	MMP9
	MPP7	ETS1
	ABAT	EZR
	ZNF79	ATF2
	SLC12A9	FOSL1
	DNALI1	NQO1
	CDADC1	ST6GAL1
	DDX17	RPA2
	TRDC	MUC1
	LRRC56	TIMP2
	SZT2	CD44
	LPAR6	CREB1
	ZNF57	PDGFRA
	KAT8	EPCAM
	PIN4	MGMT
	RBM5	PRKCA
	ARHGEF19	JUNB
	TAF1	GJA1
	TRIM24	SMPD1
	EIF4E3	JUND
	ITPKB	CEBPB
	ZNF101	ENG
	PPM1M	LGALS3
	SAT2	ERCC2
	SLC15A2	ITGB5
	TCTA	EGR1
	SPIN3	ITGB6
	DHRS1	ATF6
	PEX11B	XRCC1
	NBPF11	CDH2
	USP54
	SULT1A1
	SLC25A33
	SS18L2
	SLC46A3
	TMEM98
	TMEM260
	RTL5
	AP4S1
	FMO4
	RNFT1
	ZNF44
	MAN1C1
	GOLGA8A
	CCNO
	INTS9
	HSD17B13
	ARID4A
	TMEM130
	INAFM2
	CROCC
	TMEM163
	ZNF14
	PET100
	LZTS3
	GMPR
	NCOA5
	TRAF3IP3
	SLC9A9
	STX10
	ESYT3
	TMA7
	RBP5
	NSUN6
	CUTA
	OMA1
	ZNF322
	ZNF254
	KLRG2
	BLVRA
	GSTA1
	ATOSA
	C3orf62
	MAT2A
	LTA4H
	PBXIP1
	ZNF785
	PRKCD
	ZNF791
	RBMX2
	CLEC10A
	ORMDL3
	ZNF554
	EAPP
	LGALS8
	SH2B1
	NOL12
	TTC32
	PRKCE
	KIDINS220
	CENPC
	GANC
	RAB40B
	CTF1
	DTX3
	FAM200B
	FAM83A
	GALNT2
	LOXL2
	FSTL3
	BCAR3
	CMIP
	IER5L
	MYO1E
	SP6
	COL22A1
	LDHA
	L1CAM
	PLCD3
	ITGB1
	LAMC2
	SERPINE1
	STK24
	GPRIN1
	RCN1
	PLIN3
	DKK1
	DUSP5
	PTX3
	LDLRAD3
	C1QTNF6
	MEAK7
	AREG
	SPECC1
	ERO1A
	EXT1
	KRT6C
	MDFI
	CDCP1
	EREG
	TLNRD1
	SNAI1
	SLC16A3
	FLNC
	FADD
	PLK1
	PLAUR
	PIEZO1
	KLF10
	ARL14
	S100A10
	AHNAK2
	VDAC1
	PKP3
	TK1
	S100A16
	RFLNA
	AP1S3
	PPP1R13L
	ASAP1
	CHRNA5
	PDGFB
	ADGRB2
	B3GNT3
	NUDCD1
	PMEPA1
	RIPOR1
	CTSL
	NOCT
	NBN
	MT2A
	MARVELD1
	GPR37
	RIPK2
	AKAP12
	PCDH7
	DEPDC1B
	ANLN
	PANX1
	CAV1
	ALDOA
	ACTN1
	SPRR1B
	LYPD3
	VEGFC
	WDR76
	ADAM10
	ALG3
	ARL2BP
	LY6K
	CHMP4C
	EMC6
	SPC25
	LAMB3
	CDCA3
	FLRT3
	IGFBP1
	TFAP2A
	SLC2A1
	HMMR
	PYGB
	ECT2
	NEIL3
	IER5
	BCAR1
	SEMA4B
	B4GALT1
	ACOT7
	SMOX
	FAF2
	PLOD2
	FKBP4
	CEP55
	KRT6A
	FAM83B
	ZNF185
	STC1
	IL1A
	SERPINB5
	PSMD2
	MAP4K4
	FURIN
	PLEK2
	GGH
	CAMK2N1
	PXN
	RAB35
	TAX1BP3
	PRR11
	ANKEF1
	AGFG1
	EIF4A3
	MRPS24
	SHC1
	FOSL1
	UPP1
	MYEOV
	TM9SF1
	SOX9
	CALM3
	SLC25A32
	PTBP3
	KNL1
	NUP62CL
	MAD2L1
	ADA
	ARHGAP10
	OIP5
	FSCN1
	RHOV
	MFSD12
	PSMD1
	MRPL12
	FUBP3
	CDC42BPB
	ANO1
	ASPM
	SDCBP2
	SLC7A5
	DSG2
	ITGA5
	HJURP
	PPP2R1A
	OSTC
	AFAP1
	PKM
	CANT1
	TBC1D31
	FOXM1
	SAMD9
	POSTN
	OSGIN2
	GFPT2
	PAFAH1B2
	RHOD
	TMC7
	DNAJC9
	KIF11
	HMGA1
	PKMYT1
	MMP7
	CCNB1
	TICAM1
	MOCOS
	MSANTD3
	BUB1B
	ITPRIP
	ASPH
	FUT4
	NEDD1
	CENPA
	SLC35F6
	DIAPH3
	PERP
	GPR153
	FBXO45
	SNX9
	FAM83H
	HOXD8
	RHCG
	DSCC1
	YWHAZ
	BUB1
	MCM5
	MPZL1
	MELK
	TPM3
	SCARB1
	SLC35F2
	PLAU
	SLC16A1
	PDLIM7
	RAET1L
	FAT1
	STK3
	CCNA2
	CDC25C
	TMA16
	COL1A1
	GREM1
	BIRC5
	SLC44A1
	CDKN3
	GJB3
	RAC1
	HOXB5
	CCNB2
	HHIPL2
	GTSE1
	SQLE
	SLCO4A1
	POGLUT2
	ID1
	ITPKC
	PPP2R2C
	UCK2
	TOP2A
	ADAMTS4
	KRT18
	P4HA1
	BZW1
	PPFIBP1
	MBOAT7
	PLK4
	NEDD4
	TNS4
	MYO1C
	TBC1D1
	RRAS
	PLEC
	YWHAG
	RAET1G
	APOL1
	COL5A2
	C19orf33
	TOR1A
	UGGT2
	EFHD2
	CKAP4
	DEFB1
	BAK1
	SERINC2
	KLK8
	TNIP2
	KPNA2
	POPDC3
	DSC2
	GPR35
	SAPCD2
	YWHAB
	LRRC42
	C11orf24
	APLN
	GJB2
	TMOD3
	CD70
	RNF4
	C12orf43
	TPX2
	CENPN
	SLC35D1
	NT5E
	CDC42EP2
	LRCH1
	RAD23B
	NCAPH
	TMPRSS11E
	LAD1
	STRIP2
	PKP2
	KIF20A
	TUBA1C
	EAF1
	VARS1
	MSX2
	BTBD3
	LRP8
	CDKN1A
	ESPL1
	ITGB4
	PRR15
	PDF
	CYFIP1
	TMEM45A
	ANXA2
	CENPU
	TEDC2
	CASP14
	CKAP2L
	ARHGDIA
	ERLIN1
	INHBA
	MTDH
	DLGAP5
	CDK1
	CDCA4
	SLMAP
	R3HDM1
	MYADM
	CDC27
	GAL
	PARVA
	MTFR2
	CCDC137
	EFNB2
	CDH3
	INCENP
	KIF14
	ARHGAP11A
	CCNE2
	ACSL3
	ADGRG6
	SQOR
	ACTN4
	KLK6
	F2RL1
	C11orf86
	KREMEN2
	EHBP1
	EIF5A
	SPOCK1
	HSPA2
	NEK2
	ARSI
	NUF2
	LRP10
	GPR4
	RPS6KA4
	PVR
	HROB
	CD151
	ANGPTL4
	UPK2
	ETHE1
	FAM83D
	NCKAP1
	ADAMTS15
	KLK5
	PTDSS1
	POP1

## Sheet: Supplementary Table 4_II
Significant genes TTvsHT epithelial subset	Significant genes TOvsHT epithelial subset	Significant genes TTvsHT cancer hallmark subset	Significant genes TOvsHT cancer hallmark subset	Overlap significant genes TT_TO epithelial subset	Overlap significant genes TT_TO cancer hallmark subset
GRHL2	CD3E	GRHL2	RPS3	MPP7	CAMSAP3
MPP7	ANXA1	MAPKAP1	ANXA1	KRT15	WWC3
SMYD3	ANXA2	RICTOR	LMNA	SMAD2	RASSF2
MARVELD2	ITGAX	NRDE2	FABP3	RAF1	DOCK2
KRT15	CR1	KAT7	ANXA2	WAS	RUNX1
PKP4	CBR1	INPP5D	ITGAX	PATJ	FYB1
RAC1	SLC11A2	CLMN	CR1	UHRF2	BCR
ITGA5	CNTF	POLB	PARK7	CDK16	NSMCE3
VASN	COMP	NF1	GAPDH	SMAD5	SMAD2
ADAM15	YTHDF2	TAF6L	TNXB	KITLG	RAF1
ELF3	HNRNPU	BCCIP	GJC1	ENG	GADD45GIP1
HOOK1	PLA2G4C	CAMSAP3	KLHL42	VCAM1	APTX
NR2F6	ANXA7	ECM1	CNTF	EPB41L3	WAS
TRAF4	NGEF	RAC1	YTHDF2	ANG	ALOX5
HAX1	ARX	PKP4	COMP	HLA-DPB1	CYBB
SRPK1	WASF2	SAV1	PTPRB	HCK	PNKP
EHF	CTBP1	CDK9	HNRNPU	RB1	UHRF2
MAGI3	LRP8	IGF1R	RPRD1B	TRPV2	ENTPD1
FMNL1	RASGRP1	TAF6	HNRNPD	ITGAM	PCDH7
PDZD11	AFDN	WWC3	HMGA1	NKX2-1	KITLG
RBPJ	RCC2	WASL	TM9SF4	MMP2	ENG
CEP131	HSPD1	CHIT1	ARL2	ITGAX	VCAM1
FNBP1L	TWF1	PARG	WASF2	COL15A1	ANG
CHMP1B	SULT1B1	RASSF2	CTBP1	ITGAL	RRP8
TIAM1	CLASP2	N6AMT1	NAMPT	FOXA1	PRELP
TJP3	VDAC1	ITGA5	CKAP5	TDRD7	HLA-DPB1
SMAD2	CLDND1	ARID2	UCHL5	EPB41L4B	STAB1
ILDR1	UNC45A	VASN	AFDN	BST2	NF2
RAF1	POLDIP2	THAP11	ATP2A2	HLA-DMA	TXLNG
PRKCI	AKT2	ADAM15	PHIP	PTPRU	HCK
GIPC1	NDEL1	WRNIP1	MAZ	MPP2	TBC1D8
MICAL3	SAPCD2	DOCK2	RCC2	ADGRF5	SLC44A4
SIRPA	WAS	PES1	UBR5	THY1	FOXO3
CLDN1	BST2	BRAP	NUP62	MPP1	RB1
VANGL2	PROM2	MGME1	DNAAF5	CEACAM5	PTGES
ASF1B	CX3CL1	INO80C	KAT6A	FGB	VMP1
TAPT1	SLC34A1	IFT74	BAX	TF	ITGAM
WAS	LPAR1	SMC6	CSNK2A1	SPTB	IRS1
RXRA	ANGPT2	ANAPC16	CCL21	MRTFB	CDH11
AFG2A	METTL3	RUNX1	KHDRBS1		MMP2
RPS6KB1	SPTB	PTEN	CDC16		HLTF
PATJ	DDX41	POLG	SASS6		MFAP4
LSR	RMDN3	GPSM3	CLASP2		ITGAX
ZNF281	ZEB1	DAB2IP	RNH1		COL15A1
CRIPT	PODXL	TDP1	ITGA11		HLA-DMB
UHRF2	MYL9	FYB1	RSL1D1		F2
CLDN3	PLAUR	PTPN2	POLR3G		YPEL5
CDK16	CD200	ERBB2	ETS1		ITGAL
SMAD5	TAF8	CDK11B	COL8A2		AIF1
SLC4A4	ACTN1	FMNL1	RBBP7		LSAMP
KITLG	CA4	KMT2D	POLDIP2		SPON1
ENG	PDILT	XPC	NDEL1		CELSR2
NRP2	FLRT2	RBPJ	SAPCD2		IL16
HLA-DPA1	H1-6	BRD7	BST2		BST2
VCAM1	SH2D2A	MTA3	CUL3		EMILIN1
EPB41L3	FOLH1	FPGS	WAS		AZGP1
SHB	L1CAM	WDR35	CNTFR		LCP1
ANG	PRKCD	TAOK1	CX3CL1		HLA-DMA
DLG5	SRA1	PAXX	MTPN		PTPRU
HLA-DPB1	CD93	CEP131	CAMSAP3		GPNMB
LCP2	ANG	RPTOR	HP1BP3		POLA1
HCK	IMPACT	BCR	TSC2		PPBP
RB1	SH3PXD2B	NHEJ1	DNA2		C8B
TRPV2	HRAS	PHF14	BST1		MMRN2
ITGAM	TMEM119	CHMP1B	SSR1		COL12A1
ANXA6	TH	GTF2H4	ASCC3		THY1
MISP	NME1	CROCC	DSCC1		FABP3
PRRC2B	CD46	NSMCE3	AIF1		MZB1
NHS	KDM6B	DYNC2H1	SIAH2		CEACAM5
SMAD1	CDK4	TIAM1	ANGPT2		C7
CNKSR1	CLDN5	SPOUT1	PRELP		SCGB3A1
NKX2-1	MOSPD1	SMAD2	TUBB
TP63	SEMA4A	GTF2H1	RP1L1
DCBLD2	PCNA	RAF1	E2F1
GAMT	JAM3	THEMIS2	DDX41
ETV6	TGFA	PRKCI	NPR1
DAB2	SUV39H1	GADD45GIP1	PSTPIP1
MMP2	SMAD2	WDR6	WWC3
SOX9	IRF6	ERCC3	PGLYRP2
H1-1	TOLLIP	TADA2B	SKA3
BGN	DNPH1	PDGFRB	ZEB1
ITGAX	ADAM17	HMOX1	ERBIN
SLITRK6	ARHGEF2	SIRPA	PODXL
CD14	TBCB	MICAL3	USP3
HRG	GAD1	CLDN1	HTRA2
KDF1	SCARB1	FOXP1	CD200
FRK	CXADR	APTX	PLAUR
PTPRC	ASIC1	UBP1	MTOR
COL15A1	FGFR1	MPG	DSN1
LTF	ABCA1	IGHA1	FLRT2
CSF1R	TENM3	COL7A1	FOXM1
PKP2	TPBG	CELSR1	RUNX1
ITGAL	RASA1	TAPT1	MPIG6B
FOXA1	PCSK9	ZMYND11	SH2D2A
TRPV4	ENG	DMAP1	MAP4K1
DCN	EPB41L5	ARHGAP5	MLH3
TRAF2	CHRDL1	WAS	MAP2K6
CLDN7	GSTK1	MLH1	PRKCD
MST1R	NHSL2	ALOX5	FKRP
TDRD7	HNRNPAB	RPS6KB1	CD93
EPB41L4B	NELL1	ERCC4	L1CAM
BST2	KRT20	FERMT1	CTC1
MRC1	ELANE	CYBB	ENTPD1
AHDC1	GP1BA	IFT140	ANG
MEIS1	INHBB	RIOK2	TSC22D2
CPM	CDC42	STAG1	NEK6
APOA4	TLL2	BBS1	PFKM
PECAM1	SFRP1	ABI2	TCIRG1
ADGRG1	FAT1	PNKP	GTPBP4
CSPG4	BTBD1	CHD1L	HRAS
AMBP	PATJ	CTDP1	LLGL2
HLA-DMA	STRBP	PIK3CA	CSNK1A1
TIMELESS	CLPTM1	PELO	GNAI2
PTPRU	PICALM	EMSY	CCNB3
LBP	MYO9B	UHRF2	NME1
PLG	CDK16	MAPRE3	HYOU1
KNG1	KITLG	IFT70B	TES
PLXND1	UHRF2	ENTPD1	MAD1L1
FGG	JAM2	CHEK2	CDK4
EYA3	CLIP3	PCDH7	HDGFL2
LPXN	SRPX	IGHV3-7	CLDN5
MPP2	IHO1	CLDN3	SECTM1
PROM1	DLG4	CKS2	CSNK2B
KDM3A	EPB41	KITLG	BCR
ADGRF5	SMAD5	ENG	SEMA4A
FGR	RALA	SGSM3	JAM3
PEG10	STIL	ARVCF	PCNA
CDH13	HSPG2	VCAN	TGFA
AJUBA	JAK3	NUBP2	PDF
FOLR2	FBLN1	HLA-DPA1	SMAD2
GNAI1	FLI1	NRP2	IRF6
RACGAP1	B2M	FARP2	STAB1
THY1	ADIPOQ	LETMD1	SUV39H1
IGHM	THBS4	IFT122	DNPH1
LAMP3	SPATA9	ZNF830	LRRN2
AOC3	ITGAM	VCAM1	ADAM17
LRP6	ITGAL	KATNA1	ARHGEF2
CD34	CD302	REXO4	TLR9
MPP1	THEMIS	SHB	MVD
CEACAM5	SRC	ANG	GADD45GIP1
FGB	FCER1G	RRP8	CXADR
TF	MYOD1	DYNC2LI1	SEPTIN5
SPTB	ITGA2	DLG5	FCAR
POF1B	PRNP	PRELP	FGFR1
TAGLN	MEIS2	HLA-DPB1	NSMCE3
CES1	MMP19	TENT4B	PRG2
FHL1	RB1	ATRX	MCM8
MRTFB	SRMS	LCP2	TENM3
KRT13	SERPINB5	STAB1	CDC34
HLA-DRA	LHX1	NF2	PKMYT1
	PCDH1	TXLNG	FES
	CD38	NSMCE1	RASA1
	BNC1	HCK	LCP1
	PSEN2	TBC1D8	DNASE1L3
	CCIN	C1QC	TPBG
	ANKS4B	SLC44A4	EPB41L5
	BCAM	FOXO3	ENG
	CCL2	RB1	EP400
	WNT5A	FERMT3	PFKP
	LY6D	TLK1	MFAP4
	GAS7	IGHA2	RFC1
	B4GALT1	PTGES	SHMT2
	FGF10	VMP1	SPRY1
	SLC39A6	EZH2	COL4A3
	GK2	TAOK2	HNRNPAB
	LRFN3	MAEA	CCNB2
	YY1AP1	ITGAM	KIF20B
	NEDD4L	IRS1	SUMO1
	USP42	SYF2	ZNF668
	NTSR1	VGLL4	GP1BA
	QKI	MISP	CDC42
	PITX2	C9	RO60
	PLXDC1	SCAP	SFRP1
	GCNT3	LDB1	FAT1
	LAT	CDH11	STAG2
	DIAPH2	USP16	ENPEP
	BMP5	SMAD1	PNKP
	MSLN	SDHD	MYL2
	ROR2	LIG4	PCDHGB5
	TF	TP63	IKZF1
	SDC2	DCBLD2	KITLG
	FOXA1	SMARCD1	UHRF2
	PCSK6	DAB2	EPHB4
	FCRL1	MMP2	DERL2
	TRPV2	HLTF	BOD1L1
	CPLX2	CCNT1	EPB41
	FUT4	SOX9	TERF1
	SPRY2	MIS12	PCDH7
	SKIL	MFAP4	MZB1
	AGTRAP	NEDD1	SRPX
	PRKCZ	XRCC1	BRD9
	IL1RAPL1	ITGAX	ADAM12
	BMP7	SUZ12	TIPIN
	ADAMTS9	PRKCB	SPON1
	HLA-DMA	PMS1	LSAMP
	THY1	PTGIS	RALA
	TGFBR1	GTF2H5	PIK3CG
	TDRD7	ZMIZ1	USP33
	EPB41L4B	TTC8	HSPG2
	GTSF1	HRG	THBS3
	TMEM176B	PANK2	ENO3
	ITGB1BP1	NSMCE4A	LIN54
	ENO1	TERF2	RAD21
	CASP14	COL15A1	FBLN1
	BIN2	DDB2	B2M
	CD47	PARVB	ZGRF1
	TGFB3	HLA-DMB	NPAT
	RASAL3	F2	RNF139
	ADGRV1	GAREM1	POLM
	SOX2	IGKV4-1	AZGP1
	USH1C	CBX8	ATP6V0A2
	CLSTN3	CSF1R	TNFSF13B
	KRT15	PHF8	THBS4
	MS4A1	PKP2	PODXL2
	MYO7B	YPEL5	ITGAM
	EGFL7	ITGAL	TOPBP1
	RBL1	C8A	ITGAL
	TREM1	AATF	FTH1
	COL15A1	AIF1	COL16A1
	F3	LSAMP	RRP8
	PLVAP	CLDN7	IFI44
	PDE3B	TLR5	BNIP3L
	MPP2	KIFAP3	MARK4
	SEMA4G	SPON1	PRCC
	FRS2	IKBKE	EDIL3
	LRRC32	MST1R	SRC
	INSR	KIF23	SLC44A4
	MXRA8	CELSR2	ITGA2
	SULF1	TLR3	IL16
	VCAM1	WDR19	PRNP
	KRT36	PARVG	CDKN1C
	PRMT7	ZDHHC17	FOXO3
	AMBRA1	IL16	MEIS2
	PLAU	BST2	MMP19
	ADGRF5	CINP	RB1
	FGB	CD8A	TBC1D8
	STX2	MEIS1	ASCC1
	ADIRF	EMILIN1	SRMS
	MMP2	B9D1	CCNK
	HMCN1	MUC4	MIS18BP1
	CGNL1	AZGP1	VMP1
	TIE1	PECAM1	COL12A1
	ANPEP	ADGRG1	CCDC134
	CLU	CSPG4	FEZ1
	CORO1C	HCLS1	PCDH1
	CD74	AMBP	GNAI3
	MPP1	LCP1	BNC1
	SIAH1	HLA-DMA	BIRC5
	PTPRM	URGCP	CD38
	WNT2	ATN1	SFR1
	ITGA2B	TIMELESS	IRS1
	HLA-DPB1	TUSC2	UBE2S
	PAQR5	RAD17	BCAM
	HCK	PTPRU	GSDMA
	CEP85	CHTF18	CCL2
	C1QTNF5	NSMCE2	WNT5A
	HEG1	PLG	TERF2IP
	CD44	KNG1	LY6D
	HLA-B	SMARCAD1	BAP1
	KRT10	GPNMB	NFIL3
	FGFR4	PLXND1	PCDHGC3
	CEACAM5	TFDP1	SIGLEC10
	EPB41L3	EYA3	B4GALT1
	NKX2-1	MUC16	FOS
	PTPRU	JCHAIN	NTM
	CD274	C6	FGF10
	KRT19	LPXN	RHOJ
	BMPR2	IGFALS	SLC39A6
	NEDD4	TMEM231	CCKBR
	ELN	IGLV3-21	LRFN3
	YY1	POLA1	YY1AP1
	RAF1	PPBP	CDH6
	MPP7	C8B	ENTR1
	YIPF3	MMRN2	HLTF
	KRT9	NCAM2	LTB4R
	ATP5F1A	CHAF1B	MMRN1
	CASP3	COL12A1	SMC1B
	KCNB1	CDH13	QKI
	KRT6A	AJUBA	FCGR2B
	ANXA4	CHAF1A	RAD51
	SLC9A8	FOLR2	PITX2
	CD9	VWF	FYB1
	AIMP1	UHRF1	E2F6
	MRTFB	GNAI1	SH2D1A
	UBN1	RACGAP1	PLXDC1
	ENPP1	ABI3BP	CASP8AP2
	RBL2	THY1	AR
	BMPR1A	CTSG	PPBP
	NR2C1	IGLV1-47	SMG1
	ID1	FABP3	FGL1
	MYH9	AHSG	LAT
	SEMA3B	AOC3	BMP5
	ASH1L	MZB1	MSLN
	STMN1	LRP6	SDC2
	HM13	CD34	SMARCAL1
	SLFN5	NLRP2	TNFSF9
	MAPK7	RARRES1	TBCK
	TST	CEACAM5	SKAP2
	NEO1	C7	CMKLR1
	ABLIM1	KLF5	S100A7
	LRFN4	SCGB3A1	SIGLEC9
	BRAF	AQP1	ITGAE
	SORL1	FHL1	C7
	FRYL	HLA-DRA	RAD54B
	PDCD6IP		RASSF2
	MELK		ACTN2
	CORO1A		INCENP
	ZC3H12A		SPRY2
	SPP1		AKT3
			HAUS8
			CASP8
			PRKCZ
			MTCL1
			MYO1A
			SEPTIN3
			IRF1
			BMP7
			CELSR2
			HLA-DMA
			SHC1
			SLAMF7
			NFATC2
			THY1
			TGFBR1
			PCDHB2
			THBS2
			NF2
			ACTR8
			GP9
			ITGB1BP1
			C8B
			ENO1
			ADAMTS12
			DCTN3
			EMILIN1
			RELN
			CD47
			TGFB3
			WEE1
			HUS1
			HAPLN3
			BECN1
			CCL16
			STC1
			RTKN2
			CLSTN3
			CCNE2
			PRG4
			SCARF1
			RALB
			AKAP6
			DOCK2
			STK17B
			EGFL7
			RBL1
			SNRK
			TONSL
			CBL
			UVRAG
			CYBB
			COL15A1
			F3
			CGAS
			PDE3B
			TSPYL2
			CDC27
			TRAF5
			IFI44L
			TNFAIP6
			INSR
			CMA1
			CCDC13
			MXRA8
			CAMP
			VCAM1
			UIMC1
			NACC2
			PRF1
			FBXW7
			NEGR1
			RAD51D
			POT1
			AMBRA1
			PLAU
			GPNMB
			TGM1
			COL8A1
			DYRK1B
			SIGLEC8
			FKTN
			MMP2
			DLGAP5
			CDCA2
			HMCN1
			ENTPD7
			TIE1
			ANPEP
			EMB
			KIR2DL3
			YPEL5
			MAD2L2
			LRP2
			NR3C1
			CD74
			F2
			CDH11
			SIAH1
			PTPRM
			CDCA7L
			WNT2
			ITGA2B
			HLA-DPB1
			PDCD10
			ALPK1
			CENPJ
			TTC28
			CDKN2C
			CTSL
			HCK
			CEP85
			PCDHGC5
			HEG1
			GNAT1
			NCCRP1
			CD44
			ALOX5
			VSIR
			HLA-B
			BUB1B
			GEM
			HELQ
			FGFR4
			CEACAM5
			MMRN2
			HLA-DMB
			TNFSF13
			PTPRU
			PTHLH
			CD274
			FABP1
			NUCKS1
			MAPRE1
			EIF2AK1
			SPAG5
			BMPR2
			TMEM18
			VHL
			RHOD
			ALDOB
			HLA-DRB4
			YY1
			RUNX3
			TXLNG
			RAF1
			HLA-DRB5
			POLA1
			FCGR3B
			DNAJB13
			USP37
			PCDHGA2
			RUVBL1
			SERPINE1
			CAPZB
			PCLAF
			GLUL
			VTN
			CASP3
			P3H2
			KRT6A
			CEP63
			CD9
			BARD1
			AIMP1
			EPHA8
			EFS
			CCDC124
			XRCC6
			ENPP1
			RBL2
			BMPR1A
			CHFR
			POLD1
			CHEK1
			EGF
			ALCAM
			ID1
			MIEF1
			HMGN5
			MYH9
			TMEM109
			DDIT4
			HAUS2
			GSK3A
			MPLKIP
			TBRG4
			CEP43
			MAPK7
			SHPRH
			PLCG2
			CDK3
			OGDHL
			RPA1
			NEO1
			APTX
			PTGES
			TADA3
			ABI1
			RAD50
			MAPK12
			HK2
			TOP1
			ANXA3
			SORL1
			FCGRT
			CFLAR
			SIGLEC7
			SEPTIN9
			SMCHD1
			SCGB3A1
			CNTROB
			PDCD6IP
			AHCTF1
			PRR5L
			RPA2
			TFPT
			LAMC1

## Sheet: Supplementary Table 4_III
Pathways WES	Pathways Targeted Sequencing	Pathways CAR T cell response
O-linked glycosylation	Cell Cycle Checkpoints	Degradation of the extracellular matrix
Ion channel transport	PTEN Regulation	Collagen degradation
COPI-mediated anterograde transport	PKR-mediated signaling	Assembly of collagen fibrils and other multimeric structures
L1CAM interactions	Transcriptional regulation by RUNX3	Interferon gamma signaling
Phase I - Functionalization of compounds	Pre-NOTCH Expression and Processing	Integrin cell surface interactions
Arachidonic acid metabolism	Interleukin-4 and Interleukin-13 signaling	Immunoregulatory interactions between a Lymphoid and a non-Lymphoid cell
Keratinization	SUMOylation of transcription factors	FasL/CD95L signaling
trans-Golgi Network Vesicle Budding	Deubiquitination	Caspase activation via Death Receptors in the presence of ligand
Amyloid fiber formation	Processing of Capped Intron-Containing Pre-mRNA	TNF signaling
G alpha (i) signalling events	SUMOylation of transcription cofactors	Ion channel transport
Class A/1 (Rhodopsin-like receptors)	ESR-mediated signaling	Integration of energy metabolism
G alpha (q) signalling events	Protein folding	Apoptotic execution phase
DNA Double Strand Break Response	Class B/2 (Secretin family receptors)	Cell junction organization
Deubiquitination	Beta-catenin independent WNT signaling	Signaling by ERBB2
TP53 Regulates Transcription of DNA Repair Genes	WNT ligand biogenesis and trafficking	FOXO-mediated transcription of cell death gene
Meiotic synapsis	tRNA Aminoacylation	Activation of gene expression by SREBF (SREBP)
Meiotic recombination	Sialic acid metabolism	Signal regulatory protein family interactions
KEAP1-NFE2L2 pathway	Sphingolipid metabolism	Mitochondrial translation
Defective DNA double strand break response due to BARD1 loss of function	TCF dependent signaling in response to WNT	Extracellular matrix organization
SUMOylation of DNA damage response and repair proteins	Transcriptional regulation by RUNX1	L1CAM interactions
Defective homologous recombination repair (HRR) due to BRCA1 loss of function	G alpha (s) signalling events	MAPK targets/Nuclear events mediated by MAP kinases
ECM proteoglycans	Regulation of endogenous retroelements
Integrin cell surface interactions	MITF-M-dependent gene expression
Cell Cycle Checkpoints	Gene Silencing by RNA
G2/M Checkpoints	Interleukin-20 family signaling
Mitotic G1 phase and G1/S transition	Chromatin organization
Mitotic G2-G2/M phases	Interleukin-7 signaling
	Transcriptional Regulation by MECP2
	RAF/MAP kinase cascade
	Signaling downstream of RAS mutants
	Signaling by moderate kinase activity BRAF mutants
	Paradoxical activation of RAF signaling by kinase inactive BRAF
	Signaling by RAF1 mutants
	Signaling by BRAF and RAF1 fusions
	Interleukin-6 family signaling
	Interleukin-12 family signaling
	Signaling by CSF3 (G-CSF)
	Signaling by phosphorylated juxtamembrane, extracellular and kinase domain mutants
	Signaling by SCF-KIT
	Interleukin-4 and Interleukin-13 signaling
	Interleukin-3, Interleukin-5 and GM-CSF signaling
	Interleukin-2 family signaling
	Generic Transcription Pathway
	NFE2L2 regulating TCA cycle genes
	KEAP1-NFE2L2 pathway
	Neddylation
	Regulation of NFE2L2 gene expression
	Transcriptional regulation of pluripotent stem cells
	Apoptotic execution phase
	Keratinization
	RHO GTPase cycle
	Phase I - Functionalization of compounds
	Glycosaminoglycan metabolism
	Regulation of RUNX2 expression and activity
	Signaling by BMP
	Transcriptional regulation by RUNX2
	Elastic fibre formation
	POU5F1 (OCT4), SOX2, NANOG repress genes related to differentiation
	Signaling by TGFBR3
	Signaling by NOTCH3
	NFE2L2 regulating anti-oxidant/detoxification enzymes
	NFE2L2 regulating MDR associated enzymes
	NFE2L2 regulating ER-stress associated genes
	NFE2L2 regulates pentose phosphate pathway genes
	NFE2L2 regulating tumorigenic genes
	NFE2L2 regulating inflammation associated genes
	Heme signaling
	PI5P Regulates TP53 Acetylation
	Regulation of TP53 Activity through Acetylation
	Regulation of TP53 Expression
	Loss of function of TP53 in cancer due to loss of tetramerization ability
	Loss of Function of TP53 in Cancer
	Regulation of TP53 Activity through Association with Co-factors
	TP53 regulates transcription of several additional cell death genes whose specific roles in p53-dependent apoptosis remain uncertain
	TP53 Regulates Transcription of Death Receptors and Ligands
	Regulation of TP53 Activity through Methylation
	TP53 Regulates Transcription of Genes Involved in G1 Cell Cycle Arrest
	TP53 Regulates Transcription of Genes Involved in Cytochrome C Release
	TP53 Regulates Transcription of Genes Involved in G2 Cell Cycle Arrest
	TP53 Regulates Transcription of Caspase Activators and Caspases
	Repression of WNT target genes
	TP53 Regulates Transcription of Cell Death Genes
	Regulation of TP53 Degradation
	Regulation of TP53 Expression and Degradation
	Regulation of TP53 Activity
	TP53 regulates transcription of additional cell cycle genes whose exact role in the p53 pathway remain uncertain
	TP53 Regulates Metabolic Genes
	Transcriptional Regulation by TP53
	Regulation of TP53 Activity through Phosphorylation
