# Supplementary material for: Lung tumoroids as a testing platform for precision CAR T-cell therapy
Source: Research Square preprint supplement (doi:10.21203/rs.3.rs-5418471/v1), 2025-01-16
Supplement: Supplementary file 2 [file 6f407dca4ff87bb761fbd388.pdf]

## Analysis Sequence "Ehlen\_Farrera\_Tumoroids\_ImagingMask"

| Input Image                        | Input                                                                                                                                                              |                                                                                                                                                                      |                                                |
|------------------------------------|--------------------------------------------------------------------------------------------------------------------------------------------------------------------|----------------------------------------------------------------------------------------------------------------------------------------------------------------------|------------------------------------------------|
|                                    | <b>Channel group :</b> 1<br><b>Sequences :</b> ALL<br><b>Flatfield Correction :</b> None<br>Brightfield Correction<br><b>Stack Processing :</b> Maximum Projection |                                                                                                                                                                      |                                                |
| Find Cells                         | Input                                                                                                                                                              | Method                                                                                                                                                               | Output                                         |
|                                    | <b>Channel :</b> NucRed live<br><b>ROI :</b> None                                                                                                                  | <b>Method :</b> C<br>Common Threshold : 0.4<br>Area : > 100 $\mu\text{m}^2$<br>Splitting Coefficient : <u>33.8</u><br>Individual Threshold : 0.4<br>Contrast : > 0.1 | Output Population : Organoids_raw              |
| Calculate Morphology Properties    | Input                                                                                                                                                              | Method                                                                                                                                                               | Output                                         |
|                                    | <b>Population :</b> Organoids_raw<br><b>Region :</b> Cell                                                                                                          | <b>Method :</b> Standard<br>Area<br>Roundness<br>Perimeter<br>Width<br>Length<br>Ratio Width to Length                                                               | Property Prefix : Organoids_raw                |
| Calculate Intensity Properties     | Input                                                                                                                                                              | Method                                                                                                                                                               | Output                                         |
|                                    | <b>Channel :</b> ef450<br><b>Population :</b> Organoids_raw<br><b>Region :</b> Cell                                                                                | <b>Method :</b> Standard<br>Mean                                                                                                                                     | Property Prefix : Intensity Orgraw ef450       |
| Calculate Intensity Properties (2) | Input                                                                                                                                                              | Method                                                                                                                                                               | Output                                         |
|                                    | <b>Channel :</b> NucRed dead<br><b>Population :</b> Organoids_raw<br><b>Region :</b> Cell                                                                          | <b>Method :</b> Standard<br>Mean                                                                                                                                     | Property Prefix : Intensity Orgraw NucRed dead |
| Calculate Intensity Properties (3) | Input                                                                                                                                                              | Method                                                                                                                                                               | Output                                         |
|                                    | <b>Channel :</b> NucRed live<br><b>Population :</b> Organoids_raw                                                                                                  | <b>Method :</b> Standard<br>Mean                                                                                                                                     | Property Prefix : Intensity Orgraw NucRed live |

|                                            |                                                                                                                                                                                                                                                                                                                                                                                                                                                                                                                                                                                                                    |                                                                                                                                                                                                                                                                                                                                                     |                                                                                      |
|--------------------------------------------|--------------------------------------------------------------------------------------------------------------------------------------------------------------------------------------------------------------------------------------------------------------------------------------------------------------------------------------------------------------------------------------------------------------------------------------------------------------------------------------------------------------------------------------------------------------------------------------------------------------------|-----------------------------------------------------------------------------------------------------------------------------------------------------------------------------------------------------------------------------------------------------------------------------------------------------------------------------------------------------|--------------------------------------------------------------------------------------|
|                                            | <b>Region :</b> Cell                                                                                                                                                                                                                                                                                                                                                                                                                                                                                                                                                                                               |                                                                                                                                                                                                                                                                                                                                                     |                                                                                      |
| <b>Select Population</b>                   | <b>Input</b>                                                                                                                                                                                                                                                                                                                                                                                                                                                                                                                                                                                                       | <b>Method</b>                                                                                                                                                                                                                                                                                                                                       | <b>Output</b>                                                                        |
|                                            | <b>Population :</b><br>Organoids_raw                                                                                                                                                                                                                                                                                                                                                                                                                                                                                                                                                                               | <b>Method :</b> Linear Classifier<br>Number of Classes : 2<br>Cell Area [ $\mu\text{m}^2$ ]<br>Cell Roundness<br>Cell Perimeter [ $\mu\text{m}$ ]<br>Cell Width [ $\mu\text{m}$ ]<br>Cell Length [ $\mu\text{m}$ ]<br>Cell Ratio Width to Length<br>Intensity Cell ef450 Mean<br>Intensity Cell NucRed dead Mean<br>Intensity Cell NucRed live Mean | Output Population A :<br>IntactOrg_final<br>Output Population B :<br>Discarded_cells |
| <b>Calculate Morphology Properties (2)</b> | <b>Input</b>                                                                                                                                                                                                                                                                                                                                                                                                                                                                                                                                                                                                       | <b>Method</b>                                                                                                                                                                                                                                                                                                                                       | <b>Output</b>                                                                        |
|                                            | <b>Population :</b><br>IntactOrg_final<br><b>Region :</b> Cell                                                                                                                                                                                                                                                                                                                                                                                                                                                                                                                                                     | <b>Method :</b> Standard<br>Area<br>Roundness                                                                                                                                                                                                                                                                                                       | Property Prefix :<br>IntactOrg_final                                                 |
| <b>Find Nuclei</b>                         | <b>Input</b>                                                                                                                                                                                                                                                                                                                                                                                                                                                                                                                                                                                                       | <b>Method</b>                                                                                                                                                                                                                                                                                                                                       | <b>Output</b>                                                                        |
|                                            | <b>Channel :</b> NucRed dead<br><b>ROI :</b> IntactOrg_final<br><b>ROI Region :</b> Cell                                                                                                                                                                                                                                                                                                                                                                                                                                                                                                                           | <b>Method :</b> M<br>Diameter : 13 $\mu\text{m}$<br>Splitting Sensitivity : 0.4<br>Common Threshold : 0.4                                                                                                                                                                                                                                           | Output Population :<br>DeadCells_in_IntactOrg                                        |
| <b>Calculate Morphology Properties (3)</b> | <b>Input</b>                                                                                                                                                                                                                                                                                                                                                                                                                                                                                                                                                                                                       | <b>Method</b>                                                                                                                                                                                                                                                                                                                                       | <b>Output</b>                                                                        |
|                                            | <b>Population :</b><br>DeadCells_in_IntactOrg<br><b>Region :</b> Nucleus                                                                                                                                                                                                                                                                                                                                                                                                                                                                                                                                           | <b>Method :</b> Standard<br>Area                                                                                                                                                                                                                                                                                                                    | Property Prefix :<br>DeadCells                                                       |
| <b>Define Results</b>                      | <b>Results</b>                                                                                                                                                                                                                                                                                                                                                                                                                                                                                                                                                                                                     |                                                                                                                                                                                                                                                                                                                                                     |                                                                                      |
|                                            | <b>Method :</b> List of Outputs<br><b>Population : Organoids_raw</b><br>Number of Objects<br><br><b>Population : IntactOrg_final</b><br>Number of Objects<br>IntactOrg_final Area [ $\mu\text{m}^2$ ] : Sum<br><br><b>Population : DeadCells_in_IntactOrg</b><br>Number of Objects<br>DeadCells Area [ $\mu\text{m}^2$ ] : Sum<br><br><b>Method :</b> Formula Output<br>Formula : a-b<br>Population Type : Objects<br>Variable a : IntactOrg_final - IntactOrg_final Area [ $\mu\text{m}^2$ ] Sum<br>Variable b : DeadCells_in_IntactOrg - DeadCells Area [ $\mu\text{m}^2$ ] Sum<br>Output Name : Viable_Org_Area |                                                                                                                                                                                                                                                                                                                                                     |                                                                                      |

**Object Results**

Population : Organoids\_raw : None

Population : Discarded\_cells : None

Population : IntactOrg\_final : None

Population : DeadCells\_in\_IntactOrg : None

Acapella version: 5.6.0.132444. Timestamp: 2024-10-30 15:20:16 +0000.
