# Supplementary material for: Lung tumoroids as a testing platform for precision CAR T-cell therapy
Source: Research Square preprint supplement (doi:10.21203/rs.3.rs-5418471/v1), 2025-01-16
Supplement: Supplementary file 3 [file 7559a17f13280be2fdc36b86.xlsx]

## Sheet: Supplementary Table 1
Tissue frozen < 6 month
patient	freezing days	pat_age_surgery	pat_gender	histological_subtype	Tumor content	UICC initial	UICC pathology	neoadjuvant_therapy	adjuvant_therapy_first_line	adjuvant_therapy_second_line	adjuvant_therapy_third_line	RECIST_all	RECIST_end	remarks_clinical	ECOG (surgery)
LO9	0	63	f	adenocarcinoma	0.8	IA	IA	No_neoadjuvant_therapy	Carboplatin_Paclitaxel_Nivolumab_Ipilimumab_followedbymaintenance_Nivolumab_Ipilimumab	Docetaxel_Ramucirumab	Pemetrexed*	PD_I_PD_II_PR_PD_III_SD	SD	*Rituximab for lymphoma, CT scan 05/2024	ECOG 0
LO11	124	78	m	adenocarcinoma	0.8	IIA	IB	No_neoadjuvant_therapy	Carboplatin_NabPaclitaxel			I_CR	CR		ECOG 1
LO12	21	77	m	adenosquamous_carcinoma	0.9	IIIA	IIIA	No_neoadjuvant_therapy	Cisplatin_Vinorelbine*			PD	PD?	*adjuvant palliative therapy planned after short-term recurennce, not initiated (06/2022) due to pleural effusion
LO17	30	60	f	squamous_cell_carcinoma	0.7	IVA	IVB	WBRT_Carboplatin_NabPaclitaxel_Pembrolizumab_followedbymaintenance_Pembrolizumab	Pembrolizumab	WBRT	WBRT	Neo_PR(lung)_PD_I_PD(brain)_II_PD(brain)_III	PD		ECOG 0-1
LO18	111	69	m	squamous_cell_carcinoma	0.7	IIB	IIB	Carboplatin_Paclitaxel	Carboplatin_NabPaclitaxel			Neo_PD_I_?	?		ECOG 1
LO22	51	63	f	adenocarcinoma	0.4	IIIA	IIIA	No_neoadjuvant_therapy	Cisplatin_Vinorelbine_Atezolizumab*			I_NED_PD	PD	* stop Atezolizumab treatment due to toxicity after 5 cycles	ECOG 0-1
LO24	11	75	m	adenocarcinoma	0.7	IB		No_neoadjuvant_therapy	RT_Carboplatin_Paclitaxel_Ipilimumab_Nivolumab*			NED	NED	*adjuvant therapy for concomitant esophageal carcinoma	ECOG 1
LO25	128	75	m	squamous_cell_carcinoma	0.9	IB	IB	No_neoadjuvant_therapy	Carboplatin_NabPaclitaxel			I_CR/NED	CR/NED		ECOG 0-1
Tissue frozen > 6 month
LO1	625	69	m	adenocarcinoma	0.5	IB	IB	No_neoadjuvant_therapy	RT			PD_I_PD	PD
LO2	673	68	m	squamous_cell_carcinoma	0.8	IB	IB	No_neoadjuvant_therapy	No_adjuvant_therapy			NED	NED
LO6	598	84	m	adenocarcinoma	0.7	IIIA	IIIA	No_neoadjuvant_therapy	Pemetrexed_Cisplatin_Pembrolizumab_followedbymaintenancePembrolizumab*	Docetaxel		PD_I_PD_II_SD	SD	no subsequent adjuvant treatment due to age, simultaneous adenocarcinoma and neuroendocrine tumor	ECOG 1
LO7	382	78	m	adenocarcinoma	0.7	IIB	IIB	No_neoadjuvant_therapy	Surgery*	Surgery*	Afatinib	PD_I_PD_II_PD_III_SD	SD	refusal of adjuvant treatment	ECOG 0-1
LO8	435	66	m	squamous_cell_carcinoma	0.7	IA	IA	No_neoadjuvant_therapy	Carboplatin_Gemcitabine_Avelumab_Pembrolizumab*	RT*		NED	NED	*adjuvant therapy for concomitant recurrent urothelcarcinoma	ECOG 1
LO10	240	66	f	mucinous_adenocarcinoma	0.4	IB	IB	No_neoadjuvant_therapy	No_adjuvant_therapy			NED	NED		ECOG 1
LO13	392	57	f	adenocarcinoma	0.7	IIB	IIB	No_neoadjuvant_therapy	Cisplatin_Vinorelbine			I_CR	CR		ECOG 1
LO21	217	67	m	adenocarcinoma	0.3	0	0	FLO_RT_Carboplatin_Paclitaxel*	No_adjuvant_therapy			NED	NED	*neoadjuvant therapy for concomitant esophageal carcinoma	ECOG 0
