# Supplementary material for: Lung tumoroids as a testing platform for precision CAR T-cell therapy
Source: Research Square preprint supplement (doi:10.21203/rs.3.rs-5418471/v1), 2025-01-16
Supplement: Supplementary file 5 [file cc27e0f068d162c034b7a6b1.xlsx]

## Sheet: Supplementary Table 3
TO12II	TO18II	TO18I	TO17	TO12I	TO9	HO18	HO12	HO9	HO17	TT12	TT9	TT17	TT8	HT9	HT17	HT18	HT12
SMIM26	IGKV2D-30	IGHV3OR16-9	PIGBOS1	SMIM26	SMIM26	NUDT4B	NUDT4B	NUDT4B	NUDT4B	IGLV3-10	IGLV7-46	IGLV3-9	IGLV3-10	IGLV2-18	IGLV2-18	IGLV3-9	IGLV3-9
PIGBOS1	KLF18	RBM47	RBM47	TINCR	TEX13C	SMIM26	PIGBOS1	SMIM26	SMIM26	IGLV3-9	IGLV2-18	IGHV1OR15-1	IGLV3-9	IGLV3-10	IGHV3OR16-9	IGHV3-49	IGHV1OR15-1
TRBV28	RBM47	IFT56	UBA6	RBM47	MISFA	PIGBOS1	DUXB	PIGBOS1	PIGBOS1	IGHV1OR15-1	IGLV3-10	IGHV3-49	IGHV1OR15-1	IGHV1OR15-1	IGHV5-51	IGHV3-15	IGHV4-30-2
RBM47	IFT56	TMEM129	ESYT2	IFT56	LOC101059915	RBM47	RBM47	DUXB	REELD1	IGHV3-49	IGHV1OR15-1	IGLV1-36	IGHV3-49	IGKV3D-15	RBM47	IGLV9-49	IGHV3-49
UBA6	UBA6	UBA6	BLTP3B	TMEM129	RBM47	IFT56	IFT56	RBM47	RBM47	IGHV3-15	IGHV3-49	IGHV3OR16-9	IGLV1-36	IGHV3-49	UBA6	IGHV3OR16-9	IGHV3OR16-9
ESYT2	ESYT2	ESYT2	SHTN1	UBA6	UBA6	UBA6	UBA6	IFT56	IFT56	IGHV2-26	IGHV3OR16-9	IGHV1-18	IGHV3-15	IGHV3-15	ESYT2	IGHV1-18	IGKV3D-20
SHTN1	SHTN1	BLTP3B	TMEM223	ESYT2	ESYT2	ESYT2	ESYT2	UBA6	TMEM129	IGHV3OR16-9	IGKV3D-20	IGHV1-24	IGHV3-21	TRAV25	SHTN1	IGHV5-51	IGHV1-3
TMEM223	TMEM223	SHTN1	TMEM120B	SHTN1	SHTN1	SHTN1	BLTP3B	ESYT2	UBA6	IGHV1-3	IGHV3-38	IGHV5-51	IGHV2-26	IGHV3OR16-9	BICDL2	RBM47	IGHV1-24
ARHGAP10	TMEM120B	TMEM223	ARHGAP10	TMEM223	TMEM223	ILVBL	SHTN1	SHTN1	ESYT2	IGHV1-18	IGHV5-51	RBM47	IGLV9-49	IGKV3D-20	SH3PXD2B	UBA6	IGHV5-51
ARHGEF37	ILVBL	ILVBL	SLC22A23	ARHGAP10	BICDL2	PLEKHG3	TMEM223	ARHGAP10	SHTN1	IGHV1-24	UBA6	UBA6	IGHV3OR16-9	IGHV1-3	DENND3	ESYT2	UBA6
ILVBL	PLEKHG3	PLEKHG3	PXDNL	PXDNL	ILVBL	ELOVL7	TMEM120B	BICDL2	TMEM223	IGHV5-51	ESYT2	ESYT2	IGKV3D-20	IGHV5-51	CRPPA	SHTN1	ESYT2
PLEKHG3	SH3PXD2B	SH3PXD2B	ILVBL	ILVBL	PLEKHG3	SH3PXD2B	ARHGAP10	ARHGEF37	ARHGAP10	IGHV1-69-2	SHTN1	SHTN1	IGHV1-3	RBM47	WDR91	ARHGAP10	SHTN1
SH3PXD2B	CIBAR1	ANKRD18B	PLEKHG3	PLEKHG3	SH3PXD2B	NBAS	SLC22A23	ILVBL	SLC22A23	IGHV3-64D	SSC5D	ILVBL	IGHV1-18	UBA6	EFCAB5	ILVBL	SSC5D
NBAS	HFM1	PTPDC1	SH3PXD2B	SH3PXD2B	NBAS	TYW5	BICDL2	PLEKHG3	BICDL2	RBM47	DENND3	PLEKHG3	IGHV3-38	ESYT2	VPS37C	VWA8	DENND3
TARS3	NBAS	NBAS	NBAS	NBAS	TYW5	VWA8	ARHGEF37	SH3PXD2B	ARHGEF37	UBA6	VPS37C	SH3PXD2B	IGHV5-51	SHTN1	CNOT1	WDR91	VWA8
TESPA1	TARS3	TARS3	TARS3	TARS3	FUOM	SBNO1	ILVBL	HFM1	ILVBL	ESYT2	CNOT1	NBAS	RBM47	ILVBL	PALM3	VPS37C	WDR91
HYKK	FAM234B	TYW5	TYW5	HYKK	VWA8	GTPBP10	PLEKHG3	NBAS	PLEKHG3	SHTN1	PALM3	FUOM	UBA6	SSC5D	PGP	CNOT1	VPS37C
FAM234B	TYW5	VWA8	TMEM131L	FAM234B	SBNO1	WDR91	ELOVL7	TYW5	SH3PXD2B	ILVBL	COL6A6	VWA8	ESYT2	VWA8	TUBAL3	CCDC88B	CNOT1
TYW5	VWA8	SBNO1	VWA8	VWA8	GTPBP10	KLRG2	SH3PXD2B	VWA8	ZBTB7C	PLEKHG3	ELAPOR2	WDR91	SHTN1	RAB19	COL6A6	PGP	PGP
TMEM131L	SBNO1	GTPBP10	SBNO1	SBNO1	DENND11	VPS37C	NBAS	SBNO1	NBAS	SH3PXD2B	COL6A5	CNOT1	ILVBL	XIRP2	LYRM9	RIMOC1	ANKUB1
VWA8	GTPBP10	WDR91	GTPBP10	GTPBP10	PEDS1	CNOT1	TARS3	GTPBP10	TARS3	NBAS	MYO1G	CCDC88B	SH3PXD2B	CNOT1	NUDT19	TUBAL3	COL6A6
SBNO1	WDR91	KLRG2	WDR91	WDR91	CNOT1	PGP	DENND3	WDR91	TYW5	TYW5	SMIM1	PGP	NBAS	C2orf72	COL6A5	COL6A6	COL6A5
GTPBP10	KLRG2	VPS37C	DENND11	DENND11	C2orf72	RIMOC1	VWA8	KLRG2	VWA8	VWA8	NACA	RIMOC1	VWA8	PALM3	MYO1G	NUDT19	MYO1G
WDR91	PEDS1	PEDS1	VPS37C	PEDS1	FAM83G	RCCD1	SBNO1	VPS37C	SBNO1	WDR91	AGPS	TCAF2	WDR91	PGP	KIF28P	COL6A5	SMIM1
PEDS1	CNOT1	CNOT1	PEDS1	CNOT1	PALM3	ZNF316	CRPPA	CNOT1	CRPPA	PEDS1	PDLIM1	TUBAL3	GRID2IP	SOWAHB	NACA	MIF4GD	NACA
CNOT1	FAM83G	FAM83G	CNOT1	FAM83G	PGP	TCAF2	GTPBP10	PGP	GTPBP10	CNOT1	MYO1C	SMCHD1	CNOT1	TUBAL3	SMIM22	MYO1G	C11orf98
FAM83G	PGP	PGP	FAM83G	PGP	RCCD1	TUBAL3	WDR91	RIMOC1	WDR91	PGP	MYO1F	CASTOR2	CCDC88B	SMCHD1	ASDURF	NACA	AGPS
PGP	RCCD1	RIMOC1	PGP	RCCD1	ZNF316	SMCHD1	VPS37C	RCCD1	VPS37C	TCAF2	SNAP23	UNC119B	PGP	HIDE1	AGPS	AGPS	PDLIM1
RCCD1	ZNF316	RCCD1	MEIS3P1	ZNF316	TLCD2	UNC119B	TRAPPC13	ZNF316	PEDS1	TUBAL3	AIP	COL6A6	RIMOC1	NUDT19	KIF2A	KIF2A	MYO1C
ZNF316	TUBAL3	ZNF316	ZNF316	TCAF2	TVP23A	METTL15	CNOT1	TCAF2	CNOT1	SMCHD1	LGALS9	A2ML1	TLCD2	MYO1G	PDLIM1	DDX39A	MYO1F
TCAF2	SMCHD1	TCAF2	TCAF2	TUBAL3	TUBAL3	ANXA2P2	PGP	TUBAL3	CDHR4	CASTOR2	STXBP3	ELAPOR2	TUBAL3	NACA	MYO1C	PDLIM1	SNAP23
TUBAL3	CASTOR2	TUBAL3	TLCD2	SMCHD1	SMCHD1	ZSWIM8	RIMOC1	SMCHD1	FAM83G	UNC119B	SMAP	NUDT19	COL6A6	SMIM22	MYO1F	ACOT7	AIP
SMCHD1	UNC119B	SMCHD1	TUBAL3	CASTOR2	CASTOR2	PHF20L1	RCCD1	UNC119B	PGP	ABTB3	SULT2B1	MIF4GD	ELAPOR2	ASDURF	SNAP23	MYO1C	GTPBP1
CASTOR2	METTL15	CASTOR2	SMCHD1	METTL15	UNC119B	NUDT19	ZNF316	METTL15	GOLGA6B	A2ML1	LGALS8	MYO1G	NUDT19	AGPS	AIP	MYO1F	LGALS9
METTL15	LIPT2	UNC119B	CASTOR2	ANXA2P2	METTL15	MIF4GD	TUBAL3	ANXA2P2	RCCD1	HIDE1	NDUFS8	MCRIP1	MIF4GD	KIF2A	GTPBP1	SNAP23	STXBP3
ANXA2P2	OR5H1	METTL15	UNC119B	C15orf61	LIPT2	UMAD1	SMCHD1	ZSWIM8	ZNF316	MYO1G	PSMD11	NACA	MYO1G	DDX39A	LGALS9	AIP	AP3B1
ABTB3	COL6A6	LIPT2	METTL15	ABTB3	POM121C	MCRIP1	CASTOR2	ARHGAP32	TCAF2	UMAD1	PSMD12	C11orf98	NACA	PDLIM1	STXBP3	LGALS9	SULT2B1
ZSWIM8	ABTB3	SAC3D1	LIPT2	ZSWIM8	CENPX	KBTBD13	ARHGAP42	TBKBP1	TUBAL3	MCRIP1	PSMD9	AGPS	AGPS	ACOT7	RAB27B	STXBP3	LGALS8
ARHGAP32	ZSWIM8	ABTB3	ABTB3	POM121C	PHF20L1	NACA	UNC119B	CENPX	SMCHD1	NACA	ATOX1	KIF2A	KIF2A	MYO1C	AP3B1	SMAP	NDUFS8
POM121C	CENPX	ZSWIM8	ZSWIM8	FAM171A2	NUDT19	C11orf98	METTL15	NUDT19	CASTOR2	C11orf98	HIP1	TK2	TK2	MYO1F	SULT2B1	RAB27B	PSMD11
CENPX	NUDT19	ARHGAP32	MYH7B	PHF20L1	CXorf49B	SMIM22	LIPT2	COL6A5	UNC119B	AGPS	CLIC1	DDX39A	FZD9	SNAP23	APBB1	AP3B1	PSMD12
FAM171A2	MIF4GD	POM121C	ARHGAP32	NUDT19	MIF4GD	ASDURF	ANXA2P2	MIF4GD	METTL15	KIF2A	EIF3F	PDLIM1	DDX39A	AIP	LGALS8	SULT2B1	PSMD9
PHF20L1	MYO9A	CENPX	POM121C	MIF4GD	UMAD1	DNASE2	ZSWIM8	ESPN	LIPT2	TK2	WWP2	ACOT7	PDLIM1	GTPBP1	NDUFS8	APBB1	ATOX1
NUDT19	MCRIP1	PHF20L1	CENPX	MYO9A	TMEM238	AGPS	ARHGAP32	UMAD1	ANXA2P2	DDX39A	PDHX	MYO1C	ACOT7	LGALS9	PSMD11	LGALS8	SUPT5H
MIF4GD	AKR1B15	NUDT19	PHF20L1	ANKRD66	MCRIP1	KIF2A	POM121C	MCRIP1	ABTB3	PDLIM1	QSOX1	MYO1F	MYO1C	STXBP3	PSMD12	NDUFS8	DFFA
MYO1G	NACA	MIF4GD	NUDT19	MCRIP1	AKR1B15	TK2	LYRM9	NACA	ZSWIM8	ACOT7	SLC33A1	SNAP23	MYO1F	RAB27B	PSMD9	PSMD11	HIP1
HACD1	C11orf98	MYO9A	MIF4GD	AKR1B15	NACA	DDX39A	PHF20L1	C11orf98	ARHGAP32	MYO1C	PDE2A	AIP	SNAP23	AP3B1	ATOX1	PSMD12	CLIC1
MYO9A	CROCC2	UMAD1	MYO9A	NACA	C11orf98	PDLIM1	NUDT19	CROCC2	SOBP	MYO1F	IPO5	GTPBP1	AIP	SULT2B1	SUPT5H	PSMD9	EIF3F
UMAD1	ASDURF	MCRIP1	UMAD1	C11orf98	SMIM22	ACOT7	MIF4GD	SMIM22	POM121C	SNAP23	SAP18	LGALS9	GTPBP1	LGALS8	DFFA	ATOX1	WWP2
MCRIP1	AGPS	NACA	TMEM238	ASDURF	ASDURF	MYO1C	ESPN	ASDURF	YDJC	AIP	EML1	STXBP3	LGALS9	NDUFS8	HIP1	MEN1	PDHX
AKR1B15	KIF2A	C11orf98	AKR1B15	AGPS	DNASE2	SNAP23	UMAD1	AGPS	CYSRT1	GTPBP1	DNM1L	SMAP	STXBP3	PSMD11	CLIC1	SUPT5H	MATN2
NACA	TK2	ASDURF	NACA	UBXN8	AGPS	HAX1	MCRIP1	KIF2A	CENPX	LGALS9	RTCA	RAB27B	RAB27B	PSMD12	EIF3F	DFFA	QSOX1
C11orf98	DDX39A	DNASE2	C11orf98	KIF2A	UBXN8	EYA2	NACA	TK2	FOXI3	STXBP3	MANBA	AP3B1	AP3B1	PSMD9	PDHX	HIP1	IPO5
LY6L	ACOT7	AGPS	DNASE2	TK2	KIF2A	AIP	C11orf98	DDX39A	NUDT19	SMAP	AGRN	LGALS8	LGALS8	ATOX1	QSOX1	CLIC1	EML1
AGPS	MYO1C	KIF2A	AGPS	DDX39A	TK2	GTPBP1	SMIM22	PDLIM1	CIMAP1B	AP3B1	EXOC5	NDUFS8	NDUFS8	PGRMC1	WASL	EIF3F	DNM1L
UBXN8	MYO1F	TK2	UBXN8	PDLIM1	DDX39A	LGALS9	ASDURF	ACOT7	MIF4GD	SULT2B1	BTN3A3	PSMD11	PSMD11	SUPT5H	IPO5	PDHX	RTCA
KIF2A	SNAP23	DDX39A	KIF2A	ACOT7	PDLIM1	STXBP3	DNASE2	MYO1C	ESPN	LGALS8	PSMD14	PSMD12	PSMD12	DFFA	EML1	MATN2	GOLIM4
TK2	HAX1	ACOT7	TK2	MYO1C	ACOT7	ARVCF	AGPS	SNAP23	MYO9A	NDUFS8	BIN1	PSMD9	PSMD9	HIP1	DNM1L	QSOX1	AGRN
DDX39A	AIP	MYO1C	DDX39A	MYO1F	MYO1C	RAB27B	KIF2A	HAX1	SMIM1	PSMD11	CLDN5	ATOX1	ATOX1	CLIC1	RTCA	PDE2A	BTN3A3
PDLIM1	GTPBP1	SNAP23	PDLIM1	SNAP23	MYO1F	AP3B1	TK2	AIP	ERVK3-1	PSMD12	KPNA3	MEN1	SUPT5H	EIF3F	PIK3C2A	IPO5	PSMD14
ACOT7	LGALS9	HAX1	ACOT7	HAX1	SNAP23	SULT2B1	DDX39A	GTPBP1	PPP1R3G	PSMD9	VWA5A	SUPT5H	DFFA	PDHX	MANBA	SAP18	BIN1
MYO1C	STXBP3	AIP	MYO1C	AIP	HAX1	LGALS8	PDLIM1	LGALS9	UMAD1	ATOX1	SDCBP	TAF4	HIP1	MATN2	AGRN	EML1	CLDN5
MYO1F	ARVCF	GTPBP1	MYO1F	GTPBP1	AIP	NDUFS8	ACOT7	STXBP3	MCRIP1	MEN1	PITPNM1	DFFA	CLIC1	QSOX1	BTN3A3	DNM1L	KPNA3
SNAP23	SMAP	LGALS9	SNAP23	STXBP3	GTPBP1	NFKBIE	MYO1C	ARVCF	NACA	SUPT5H	DDX3X	HIP1	EIF3F	SLC33A1	PSMD14	RTCA	LAD1
HAX1	RAB27B	STXBP3	HAX1	AP4M1	STXBP3	PSMD11	MYO1F	SMAP	C11orf98	TAF4	RNASET2	CLIC1	PDHX	IPO5	BIN1	GOLIM4	VWA5A
AIP	AP3B1	AP4M1	AIP	ARVCF	AP4M1	PSMD12	SNAP23	RAB27B	SMIM22	DFFA	PODXL	EIF3F	QSOX1	SAP18	CLDN5	MANBA	SDCBP
GTPBP1	LGALS8	ARVCF	GTPBP1	SMAP	ARVCF	PSMD9	HAX1	AP3B1	ASDURF	HIP1	FCN1	WWP2	SLC33A1	IGF2BP3	KPNA3	AGRN	NOP56
STXBP3	NDUFS8	SMAP	LGALS9	RAB27B	SMAP	ATOX1	EYA2	SULT2B1	AGPS	CLIC1	PIR	PIK3CD	IPO5	DNM1L	VWA5A	PLOD2	DDX3X
AP4M1	HAS3	AP3B1	STXBP3	AP3B1	RAB27B	MEN1	AIP	LGALS8	KIF2A	EIF3F	KPNA4	PDHX	SAP18	RTCA	SDCBP	BTN3A3	RNASET2
ARVCF	NFKBIE	SULT2B1	ARVCF	LGALS8	AP3B1	PGRMC1	GTPBP1	NDUFS8	TK2	WWP2	NFIB	FOXE1	EML1	PIK3C2A	DDX3X	PSMD14	FCN1
SMAP	PSMD11	RHOD	SMAP	NDUFS8	SULT2B1	SUPT5H	LGALS9	PSMD11	DDX39A	PDHX	PPP6C	QSOX1	DNM1L	GOLIM4	RNASET2	BIN1	PIR
RAB27B	PSMD12	LGALS8	RAB27B	HAS3	RHOD	TAF4	STXBP3	PSMD12	PDLIM1	QSOX1	FBP2	DCTN6	RTCA	MANBA	PODXL	CLDN5	KPNA4
AP3B1	PSMD9	NDUFS8	AP3B1	TNFRSF10A	LGALS8	DFFA	AP4M1	PSMD9	ACOT7	DCTN6	PDXK	IPO5	GOLIM4	AGRN	PIR	KPNA3	NFIB
SULT2B1	ATOX1	HAS3	SULT2B1	NFKBIE	NDUFS8	CLIC1	ARVCF	ATOX1	MYO1C	SLC33A1	PLPP3	SAP18	MANBA	PLOD2	KPNA4	VWA5A	PPP6C
RHOD	MEN1	PSMD11	LGALS8	PSMD11	NFKBIE	EIF3F	SMAP	MEN1	MYO1F	IPO5	HSPB6	DNM1L	AGRN	PSMD14	NFIB	SDCBP	FBP2
LGALS8	CBX4	PSMD12	NDUFS8	PSMD12	PSMD11	WWP2	RAB27B	CBX4	SNAP23	POLRMT	COPE	RTCA	PLOD2	BIN1	PPP6C	NOP56	PDXK
NDUFS8	PGRMC1	PSMD9	TNFRSF10A	PSMD9	PSMD12	PIK3CD	AP3B1	PGRMC1	HAX1	SAP18	CCS	GOLIM4	EXOC5	KPNA3	MAN2B1	DDX3X	SCD
HAS3	SUPT5H	ATOX1	PSMD11	ATOX1	PSMD9	PDHX	SULT2B1	SUPT5H	AIP	EML1	ABLIM1	MANBA	PSMD14	LAD1	FBP2	RNASET2	PLPP3
TNFRSF10A	TAF4	MEN1	PSMD12	MEN1	ATOX1	QSOX1	LGALS8	TAF4	GTPBP1	DNM1L	GOSR2	TRAF5	BIN1	VWA5A	PDXK	PODXL	ISLR
NFKBIE	DFFA	CBX4	PSMD9	CBX4	MEN1	DCTN6	NDUFS8	DFFA	LGALS9	RTCA	TOR1A	AGRN	KPNA3	SDCBP	PLPP3	FCN1	HSPB6
PSMD11	RFXAP	PGRMC1	ATOX1	PGRMC1	CBX4	SLC33A1	NFKBIE	HIP1	STXBP3	PIK3C2A	ADAM10	PLOD2	USP9Y	NOP56	HSPB6	PIR	UBFD1
PSMD12	HIP1	SUPT5H	MEN1	SUPT5H	PGRMC1	WASL	PSMD11	CLIC1	AP4M1	GOLIM4	IMPA2	EXOC5	VWA5A	DDX3X	COPE	KPNA4	COPE
PSMD9	CLIC1	TAF4	CBX4	TAF4	SUPT5H	IPO5	PSMD12	EIF3F	ARVCF	AGRN	CDIPT	BTN3A3	SDCBP	RNASET2	AP3D1	NFIB	AP3D1
ATOX1	EIF3F	DFFA	PGRMC1	DFFA	TAF4	POLRMT	PSMD9	WWP2	SMAP	PLOD2	PDCD5	PSMD14	NOP56	PODXL	CCS	PPP6C	CCS
MEN1	WWP2	RFXAP	SUPT5H	RFXAP	DFFA	EEF2K	ATOX1	PIK3CD	RAB27B	EXOC5	PRMT5	BIN1	DDX3X	FCN1	ABLIM1	FBP2	ABLIM1
CBX4	PIK3CD	HIP1	TAF4	HIP1	HIP1	SAP18	MEN1	PDHX	AP3B1	BTN3A3	NHERF1	KPNA3	RNASET2	PIR	GOSR2	PDXK	GOSR2
GET1	PDHX	CLIC1	DFFA	CLIC1	CLIC1	IGF2BP3	GET1	QSOX1	SULT2B1	PSMD14	TPP1	STK25	PODXL	KPNA4	ADAM10	PLPP3	TOR1A
PGRMC1	QSOX1	EIF3F	HIP1	TNFRSF11B	EIF3F	DNM1L	PGRMC1	DCTN6	LGALS8	BIN1	TCERG1	LAD1	FCN1	PPP6C	TP53I11	ISLR	ADAM10
SUPT5H	DCTN6	WWP2	CLIC1	EIF3F	WWP2	RTCA	SUPT5H	SLC33A1	NDUFS8	KPNA3	NRP1	VWA5A	PIR	CES2	CDIPT	HSPB6	TP53I11
TAF4	SLC33A1	PIK3CD	EIF3F	PIK3CD	CDC7	PIK3C2A	TAF4	WASL	HAS3	LAD1	TNPO2	SDCBP	KPNA4	MAN2B1	PDCD5	UBFD1	CDIPT
DFFA	WASL	PDHX	WWP2	PDHX	PDHX	PIK3R2	DFFA	IPO5	TNFRSF10A	VWA5A	APOL1	NOP56	NFIB	FBP2	PRMT5	COPE	PDCD5
RFXAP	IPO5	FOXE1	PDHX	MATN2	QSOX1	GOLIM4	RFXAP	POLRMT	NFKBIE	EBAG9	POLR3A	DDX3X	PPP6C	PDXK	NHERF1	AP3D1	PRMT5
HIP1	POLRMT	QSOX1	QSOX1	QSOX1	DCTN6	MANBA	CLIC1	EEF2K	PSMD11	SDCBP	PSMA7	RNASET2	MAN2B1	PLPP3	TPP1	CCS	NHERF1
CLIC1	EEF2K	DCTN6	DCTN6	DCTN6	SLC33A1	AGRN	EIF3F	SAP18	PSMD12	PITPNM1	SCAMP3	CCL21	FBP2	ISLR	TCERG1	ABLIM1	FPGT
TNFRSF11B	SAP18	SLC33A1	SLC33A1	SLC33A1	WASL	PLOD2	WWP2	IGF2BP3	PSMD9	DDX3X	OPLAH	FCN1	PDXK	TXNDC9	NRP1	GOSR2	TPP1
EIF3F	IGF2BP3	WASL	WASL	WASL	IPO5	MEIS1	PDHX	DNM1L	ATOX1	RNASET2	IFIT3	PIR	PLPP1	COX7A2L	TNPO2	TOR1A	TCERG1
PIK3CD	DNM1L	IPO5	IPO5	IPO5	POLRMT	EXOC5	QSOX1	RTCA	MEN1	CCL21	MGST3	KPNA4	PLPP3	UBFD1	APOL1	TOR1B	NRP1
PDHX	RTCA	POLRMT	POLRMT	POLRMT	EEF2K	NDUFA4	DCTN6	PIK3C2A	CBX4	FCN1	TAX1BP3	TRIM38	ARID1A	COPE	POLR3A	ADAM10	TNPO2
QSOX1	PIK3C2A	EEF2K	EEF2K	SAP18	SAP18	PSMD14	SLC33A1	PIK3R2	PGRMC1	PIR	LIN7A	NFIB	ISLR	AP3D1	PSMA7	TP53I11	APOL1
DCTN6	IFRD1	SAP18	SAP18	IGF2BP3	IGF2BP3	KPNA3	WASL	GOLIM4	SUPT5H	KPNA4	IKBKB	PPP6C	HSPB6	CCS	SCAMP3	CDIPT	PSMA7
SLC33A1	PIK3R2	IGF2BP3	IGF2BP3	DNM1L	DNM1L	STK25	IPO5	MANBA	TAF4	PPP6C	UBE2L6	CES2	UBFD1	GOSR2	OPLAH	PDCD5	SCAMP3
WASL	GOLIM4	DNM1L	DNM1L	RTCA	RTCA	USP9Y	POLRMT	AGRN	DFFA	CES2	CASK	MAN2B1	COPE	TOR1A	IFIT3	PRMT5	OPLAH
IPO5	MANBA	RTCA	RTCA	PIK3C2A	PIK3C2A	LAD1	EEF2K	PLOD2	RFXAP	MAN2B1	UQCR11	FBP2	AP3D1	TOR1B	MGST3	NHERF1	IFIT3
POLRMT	AGRN	PIK3C2A	PIK3C2A	IFRD1	IFRD1	FAAH	SAP18	MEIS1	HIP1	FBP2	HGS	UBE2C	CCS	ADAM10	TAX1BP3	FPGT	MGST3
SAP18	PLOD2	IFRD1	IFRD1	PIK3R2	PIK3R2	VWA5A	IGF2BP3	EXOC5	CLIC1	PDXK	VPS26C	PDXK	GOSR2	TP53I11	GIPC1	TPP1	TAX1BP3
EML1	EXOC5	PIK3R2	PIK3R2	GOLIM4	GOLIM4	PES1	DNM1L	PSMD14	EIF3F	SCD	PPP1R12A	PLPP1	TOR1A	CDIPT	IKBKB	TCERG1	LIN7A
IGF2BP3	NDUFA4	GOLIM4	GOLIM4	MANBA	MANBA	EBAG9	RTCA	ZNF593	WWP2	PLPP3	GAK	PLPP3	ADAM10	PDCD5	HAT1	NRP1	HAT1
DNM1L	PSMD14	MANBA	MANBA	TRAF5	AGRN	SDCBP	PIK3C2A	BIN1	PIK3CD	ARID1A	HNRNPDL	ARID1A	ITGB1BP1	PRMT5	UBE2L6	TNPO2	UBE2L6
RTCA	ZNF593	AGRN	AGRN	AGRN	PLOD2	PITPNM1	GOLIM4	KPNA3	PDHX	ISLR	XPO1	ISLR	CDIPT	NHERF1	CASK	APOL1	CASK
PIK3C2A	KPNA3	PLOD2	PLOD2	PLOD2	EXOC5	MPHOSPH10	MANBA	STK25	FOXE1	TXNDC9	PLXNB2	COX7A2L	PDCD5	FPGT	UQCR11	PSMA7	UQCR11
IFRD1	BCL9	EXOC5	EXOC5	EXOC5	PSMD14	NOP56	AGRN	LAD1	QSOX1	UBFD1	SYNM	HSPB6	PRMT5	TPP1	VPS26C	SCAMP3	HGS
PIK3R2	LAD1	NDUFA4	NDUFA4	BTN3A3	ZNF593	DDX3X	PLOD2	FAAH	DCTN6	COPE	PFAS	UBFD1	NHERF1	TCERG1	PPP1R12A	OPLAH	VPS26C
GOLIM4	KRIT1	PSMD14	PSMD14	NDUFA4	BIN1	RNASET2	MEIS1	CHL1	SLC33A1	CDC42EP2	DCLK1	CYB561D2	TNFRSF10B	NRP1	GAK	IFIT3	PPP1R12A
MANBA	PES1	ZNF593	BIN1	PSMD14	KPNA3	PIR	EXOC5	VWA5A	WASL	AP3D1	ERC2	COPE	FPGT	TNPO2	HNRNPDL	MGST3	GAK
TRAF5	EBAG9	KPNA3	KPNA3	BIN1	STK25	KPNA4	NDUFA4	PES1	IPO5	CCS	LSM1	CDC42EP2	TPP1	APOL1	XPO1	TAX1BP3	HNRNPDL
AGRN	SDCBP	USP9Y	USP9Y	KPNA3	USP9Y	TRIM38	PSMD14	EBAG9	POLRMT	ABLIM1	FYB1	AP3D1	TCERG1	POLR3A	SEC16A	GIPC1	XPO1
PLOD2	PITPNM1	BCL9	BCL9	USP9Y	LAD1	NFIB	BIN1	SDCBP	EEF2K	GOSR2	AGPAT2	CCS	NRP1	PSMA7	PLXNB2	IKBKB	ARHGEF10
EXOC5	MPHOSPH10	LAD1	LAD1	BCL9	FAAH	PPP6C	KPNA3	PITPNM1	SAP18	TOR1A	SCAMP2	GOSR2	TNPO2	SCAMP3	SYNM	HAT1	SEC16A
NDUFA4	NOP56	PES1	FAAH	LAD1	PES1	CES2	STK25	MPHOSPH10	IGF2BP3	TOR1B	ARPC1B	TOR1A	APOL1	OPLAH	PFAS	UBE2L6	PLXNB2
PSMD14	DDX3X	EBAG9	KRIT1	FAAH	EBAG9	PIK3C2B	USP9Y	NOP56	DNM1L	STX16	ARPC2	TOR1B	PSMA7	IFIT3	LSM1	CASK	SYNM
ZNF593	RNASET2	SDCBP	PES1	KRIT1	SDCBP	MAN2B1	BCL9	DDX3X	RTCA	ADAM10	ARPC3	STX16	SCAMP3	MGST3	AGPAT2	UQCR11	PFAS
BIN1	PEX12	MPHOSPH10	EBAG9	PES1	PITPNM1	FBP2	LAD1	RNASET2	PIK3C2A	EI24	POLR1C	ADAM10	OPLAH	TAX1BP3	SCAMP2	RAB29	DCLK1
KPNA3	PIR	NOP56	SDCBP	EBAG9	MPHOSPH10	UBE2C	FAAH	PIR	IFRD1	TP53I11	PGRMC2	TP53I11	IFIT3	HAT1	ARPC1B	VPS26C	ANKRD28
STK25	PEX7	DDX3X	PITPNM1	SDCBP	NOP56	PDXK	CHL1	KPNA4	PIK3R2	APAF1	RGL2	MAP2K7	MGST3	UBE2L6	ARPC2	PPP1R12A	AGPAT2
USP9Y	KPNA4	RNASET2	MPHOSPH10	PITPNM1	DDX3X	SCD	VWA5A	TRIM38	GOLIM4	RIOK3	PFDN6	CDIPT	TAX1BP3	CASK	ARPC3	GAK	SCAMP2
BCL9	NFIB	PIR	NOP56	MPHOSPH10	RNASET2	ARID1A	PES1	NFIB	MANBA	MAP2K7	GNPAT	PDCD5	IKBKB	UQCR11	POLR1C	HNRNPDL	ARPC1B
LAD1	E2F3	PEX7	DDX3X	NOP56	PIR	BHLHE40	EBAG9	E2F3	AGRN	CDIPT	LAMA5	PRMT5	HAT1	LECT2	PGRMC2	XPO1	ARPC2
KRIT1	PPP6C	KPNA4	RNASET2	DDX3X	PEX7	SDHD	SDCBP	PPP6C	PLOD2	PDCD5	ZNF185	NHERF1	UBE2L6	HGS	RGL2	SEC16A	ARPC3
VWA5A	CES2	TRIM38	PODXL	RNASET2	KPNA4	TXNDC9	PITPNM1	CES2	MEIS1	PRMT5	CLIC2	FPGT	CASK	RAB29	PFDN6	PLXNB2	POLR1C
PES1	MAN2B1	NFIB	PEX12	PODXL	NFIB	TRAFD1	MPHOSPH10	PIK3C2B	EXOC5	NHERF1	ACOX3	TPP1	VPS26C	VPS26C	GNPAT	SYNM	PGRMC2
EBAG9	UBE2C	E2F3	PIR	PIR	E2F3	COX7A2L	NOP56	MAN2B1	NDUFA4	TNFRSF10B	RER1	TCERG1	PPP1R12A	PPP1R12A	LAMA5	PFAS	RGL2
SDCBP	PDXK	PPP6C	KPNA4	KPNA4	PPP6C	HSPB6	DDX3X	FBP2	PSMD14	FPGT	SURF4	KIF3C	GAK	GAK	ZNF185	DCLK1	PFDN6
PITPNM1	SCD	CES2	E2F3	NFIB	CES2	UBFD1	RNASET2	UBE2C	ZNF593	TPP1	SPTLC1	NRP1	HNRNPDL	HNRNPDL	CLIC2	CEP290	GNPAT
MPHOSPH10	ARID1A	PIK3C2B	PPP6C	E2F3	MAN2B1	COPE	PIR	PDXK	BIN1	TCERG1	SPTLC2	TNPO2	XPO1	XPO1	ACOX3	ANKRD28	LAMA5
NOP56	SDHD	MAN2B1	CES2	PPP6C	UBE2C	AP3D1	KPNA4	SCD	KPNA3	NRP1	ALOX15B	APOL1	SEC16A	SPTBN2	RER1	LSM1	ZNF185
DDX3X	NEMP1	UBE2C	PIK3C2B	NME4	PDXK	CCS	TRIM38	ARID1A	STK25	TNPO2	TM9SF1	TSPAN4	PLXNB2	SEC16A	SURF4	FYB1	CLIC2
RNASET2	TXNDC9	PDXK	MAN2B1	CES2	SCD	ABLIM1	NFIB	SDHD	LAD1	APOL1	INPP4B	PSMA7	RIMBP2	PLXNB2	MAPK13	DEGS1	ACOX3
PODXL	DPYSL4	SCD	FBP2	MAN2B1	ARID1A	DVL2	E2F3	NEMP1	FAAH	PSMA7	PPM1G	SCAMP3	SETD1A	U2SURP	SPTLC1	SCAMP1	RER1
PEX12	TRAFD1	ARID1A	UBE2C	UBE2C	C2CD2L	CHD1	PPP6C	DPYSL4	KRIT1	SCAMP3	EIF3D	OPLAH	SYNM	PFAS	SPTLC2	SCAMP2	SURF4
PIR	COX7A2L	SDHD	PDXK	PDXK	TXNDC9	CHD2	CES2	TRAFD1	CHL1	OPLAH	EIF3H	BCKDK	PFAS	LSM1	OGT	ARPC1B	SPTLC1
KPNA4	UBFD1	C2CD2L	SCD	SCD	TRAFD1	GOSR2	MAN2B1	COX7A2L	VWA5A	BCKDK	BCAT2	IFIT3	DCLK1	NPC1	ALOX15B	ARPC2	SPTLC2
TRIM38	CIT	NEMP1	PLPP3	ARID1A	COX7A2L	TOR1A	FBP2	HSPB6	PES1	IFIT3	NCAM2	MGST3	ANKRD28	AGPAT2	PMM2	ARPC3	ALOX15B
NFIB	COPE	TXNDC9	ARID1A	ISLR	UBFD1	TOR1B	UBE2C	UBFD1	EBAG9	MGST3	STX7	TAX1BP3	ARHGEF11	DEGS1	TM9SF1	BET1	PMM2
E2F3	RFXANK	DPYSL4	BHLHE40	BHLHE40	DYNC1I1	STX16	PDXK	CIT	SDCBP	IRF6	MSH4	IKBKB	LSM1	ANGPT2	INPP4B	POLR1C	TM9SF1
PPP6C	AP3D1	TRAFD1	SDHD	SDHD	CIT	ADAM10	SCD	COPE	PITPNM1	TAX1BP3	CAPN5	HAT1	FYB1	SCAMP1	PPM1G	PGRMC2	INPP4B
CES2	CCS	COX7A2L	C2CD2L	NEMP1	COPE	EI24	PLPP3	RFXANK	MPHOSPH10	IKBKB	YKT6	UBE2L6	AGPAT2	SCAMP2	EIF3D	PFDN6	HMGB3
MAN2B1	ABLIM1	HSPB6	NEMP1	TXNDC9	AP3D1	TP53I11	ARID1A	AP3D1	NOP56	HAT1	POLR2D	CASK	DEGS1	ARPC1B	EIF3H	GNPAT	PPM1G
UBE2C	DVL2	UBFD1	TXNDC9	COX7A2L	CCS	PTGES	SDHD	CCS	DDX3X	UBE2L6	TAPBP	UQCR11	SCAMP1	ARPC2	BCAT2	LAMA5	EIF3D
PDXK	CHD1	CIT	TRAFD1	UBFD1	ABLIM1	KMT2D	C2CD2L	ABLIM1	RNASET2	CASK	DHX15	HGS	SCAMP2	ARPC3	NCAM2	ZNF185	EIF3H
SCD	CHD2	COPE	COX7A2L	CYB561D2	DVL2	APAF1	TXNDC9	DVL2	PIR	UQCRQ	RNMT	RAB29	ARPC1B	POLR1C	STX7	CLIC2	BCAT2
ARID1A	GOSR2	RFXANK	UBFD1	CIT	CHD1	RIOK3	TRAFD1	DNALI1	PEX7	UQCR11	ZZEF1	VPS26C	ARPC2	PGRMC2	MSH4	ACOX3	NCAM2
SDHD	TOR1A	AP3D1	CIT	COPE	CHD2	IMPA2	COX7A2L	CHD1	KPNA4	HGS	PLXNB1	PPP1R12A	ARPC3	VILL	P4HA2	RER1	IPO8
NEMP1	TOR1B	CCS	COPE	RFXANK	GOSR2	MAP2K7	UBFD1	CHD2	TRIM38	RAB29	CYB5B	GAK	PLSCR1	PFDN6	CAPN5	SURF4	STX7
TXNDC9	STX16	ABLIM1	AP3D1	CDC42EP2	TOR1A	CDIPT	COPE	GOSR2	NFIB	VPS26C	PHGDH	HNRNPDL	PGRMC2	GNPAT	YKT6	MAPK13	SLC16A3
COX7A2L	ADAM10	DVL2	CCS	AP3D1	TOR1B	PDCD5	RFXANK	TOR1A	PPP6C	PPP1R12A	DYNC1LI2	XPO1	PFDN6	LAMA5	POLR2D	SPTLC1	TLR3
UBFD1	EI24	CHD1	ABLIM1	CCS	STX16	PRMT5	PRYP4	TOR1B	CES2	SLC27A2	PSMD3	PDZD2	GNPAT	ZNF185	TAPBP	SPTLC2	MSH4
CIT	TP53I11	CHD2	DVL2	ABLIM1	ADAM10	NHERF1	AP3D1	STX16	PIK3C2B	GAK	PAPSS1	SPTBN2	LAMA5	CLIC2	DHX15	ALOX15B	YKT6
COPE	PTGES	GOSR2	CHD1	DVL1	EI24	TNFRSF10B	CCS	ADAM10	MAN2B1	HNRNPDL	PRODH	SEC16A	CLIC2	ACOX3	PLXNB1	PMM2	ARPC5
RFXANK	KMT2D	TOR1A	CHD2	DVL2	TP53I11	FPGT	ABLIM1	EI24	FBP2	XPO1	SPINT1	PLXNB2	ACOX3	RER1	CYB5B	TM9SF1	TAPBP
CDC42EP2	RRH	TOR1B	GOSR2	CHD1	KMT2D	TPP1	DVL2	TP53I11	UBE2C	SEC16A	SART1	U2SURP	RER1	NPHP1	PHGDH	INPP4B	DHX15
AP3D1	RIOK3	STX16	TOR1A	CHD2	RIOK3	TCERG1	DNALI1	PTGES	ACACB	PLXNB2	HSPA12A	SETD1A	SURF4	SURF4	DYNC1LI2	HMGB3	CYB5B
CCS	IMPA2	ADAM10	TOR1B	GOSR2	IMPA2	NDC80	CHD1	KMT2D	PDXK	U2SURP	HNRNPR	TRANK1	SPTLC1	MAPK13	PSMD3	PPM1G	PHGDH
ABLIM1	MAP2K7	EI24	STX16	TOR1A	MAP2K7	NRP1	CHD2	APAF1	SCD	SETD1A	TXNL1	SYNM	SPTLC2	SPTLC1	PAPSS1	EIF3D	NDUFS4
CHD1	ACOT8	TP53I11	ADAM10	TOR1B	ACOT8	TNPO2	GOSR2	RIOK3	PLPP1	SYNJ2	TPD52L2	PFAS	ALOX15B	SPTLC2	PRODH	EIF3H	DYNC1LI2
CHD2	CDIPT	PTGES	EI24	STX16	CDIPT	UNC13B	TOR1A	IMPA2	ARID1A	SYNM	EIF4G3	DCLK1	PMM2	OGT	SPINT1	BCAT2	PSMD3
GOSR2	PDCD5	KMT2D	TP53I11	ADAM10	PDCD5	POLR3A	TOR1B	MAP2K7	BHLHE40	PFAS	PPIH	ANKRD28	TM9SF1	ALOX15B	TGFB1I1	NCAM2	PAPSS1
TOR1A	PRMT5	APAF1	PTGES	ABCD4	PRMT5	PSMA7	STX16	ACOT8	SDHD	DCLK1	MGAM	ARHGEF11	HMGB3	PMM2	HSPA12A	IPO8	ZW10
TOR1B	NHERF1	RIOK3	KMT2D	EI24	NHERF1	SCAMP3	ADAM10	CDIPT	TXNDC9	ANKRD28	HTRA2	CHUK	PPM1G	TM9SF1	MTSS1	STX7	PRODH
STX16	TNFRSF10B	IMPA2	APAF1	TP53I11	CHEK1	PHYH	EI24	PDCD5	TRAFD1	ARHGEF11	AKR7A2	LSM1	EIF3D	INPP4B	EEF1E1	TNRC18	SPINT1
ADAM10	MEIS2	MAP2K7	RIOK3	PTGES	TNFRSF10B	OPLAH	TP53I11	PRMT5	COX7A2L	CHUK	EPB41L2	FYB1	EIF3H	HMGB3	HNRNPR	SLC16A3	TGFB1I1
ABCD4	FPGT	CDIPT	IMPA2	KMT2D	FPGT	BCKDK	PTGES	NHERF1	HSPB6	LSM1	TGOLN2	NPC1	BCAT2	PPM1G	PRPF3	ABCC4	HSPA12A
EI24	TPP1	PDCD5	MAP2K7	APAF1	TPP1	IFIT3	KMT2D	TNFRSF10B	UBFD1	FYB1	LAMTOR5	AGPAT2	NCAM2	EIF3D	TXNL1	P4HA2	EEF1E1
TP53I11	TCERG1	PRMT5	ACOT8	RIOK3	TCERG1	MGST3	APAF1	FPGT	CIT	NPC1	B4GAT1	SCAMP1	IPO8	EIF3H	TPD52L2	CAPN5	HNRNPR
PTGES	NDC80	NHERF1	CDIPT	IMPA2	NDC80	IRF6	RIOK3	TPP1	COPE	AGPAT2	WIPF1	SCAMP2	STX7	BCAT2	EIF4G3	YKT6	TXNL1
KMT2D	NRP1	CHEK1	PDCD5	MAP2K7	NRP1	TAX1BP3	IMPA2	TCERG1	RFXANK	DEGS1	XPOT	ARPC1B	SLC16A3	STX7	PPIH	ARPC5	TPD52L2
APAF1	TNPO2	TNFRSF10B	PRMT5	ACOT8	TNPO2	GIPC1	MAP2K7	NDC80	AP3D1	SCAMP1	DNPH1	ARPC2	MSH4	SLC16A3	HTRA2	POLR2D	EIF4G3
RIOK3	UNC13B	MEIS2	NHERF1	CDIPT	POLR3A	IKBKB	ACOT8	TNPO2	CCS	SCAMP2	TIMM44	ARPC3	P4HA2	ABCC3	AKR7A2	OGG1	PPIH
IMPA2	POLR3A	FPGT	TNFRSF10B	PDCD5	PSMA7	RGS12	CDIPT	UNC13B	ABLIM1	ARPC1B	TRAPPC3	BET1	CAPN5	P4HA2	EPB41L2	TAPBP	HTRA2
MAP2K7	PSMA7	TPP1	FPGT	PRMT5	SCAMP3	TIMM23	PDCD5	POLR3A	DVL1	ARPC2	CHMP2A	POLR1C	YKT6	CAPN5	TGOLN2	DHX15	AKR7A2
ACOT8	SCAMP3	TCERG1	TPP1	NHERF1	PHYH	HAT1	PRMT5	PSMA7	DVL2	ARPC3	NCK2	PLSCR1	ARPC5	YKT6	B4GAT1	RNMT	EPB41L2
CDIPT	PHYH	NDC80	TCERG1	CHEK1	OPLAH	UBE2L6	NHERF1	SCAMP3	DNALI1	BET1	NDUFB3	PGRMC2	POLR2D	ARPC5	WIPF1	FLRT2	TGOLN2
PDCD5	OPLAH	TNPO2	NDC80	TNFRSF10B	BCKDK	CASK	TNFRSF10B	PHYH	CHD1	POLR1C	GET3	PFDN6	PDPK1	TAPBP	SGCE	PLXNB1	LAMTOR5
PRMT5	BCKDK	UNC13B	NRP1	TPP1	MGST3	UQCRQ	FPGT	OPLAH	CHD2	PLSCR1	BUB3	GSTA4	TAPBP	CLDN3	DENR	CYB5B	B4GAT1
NHERF1	MGST3	POLR3A	TNPO2	TCERG1	GEMIN2	UQCR11	TPP1	BCKDK	GOSR2	PGRMC2	ACTN4	GNPAT	DHX15	DHX15	XPOT	PRPF4	WIPF1
CHEK1	GEMIN2	PSMA7	UNC13B	NDC80	TAX1BP3	HGS	TCERG1	IFIT3	TOR1A	PFDN6	GSTZ1	LAMA5	RNMT	RNMT	DNPH1	PHGDH	SGCE
TNFRSF10B	IRF6	SCAMP3	POLR3A	NRP1	GIPC1	VPS26C	NRP1	MGST3	TOR1B	NKRF	PRKAB2	ZNF185	ZZEF1	ZZEF1	TIMM44	NDUFS4	XPOT
TPP1	TAX1BP3	PHYH	PSMA7	TNPO2	TIMM23	PPP1R12A	TNPO2	IRF6	STX16	GNPAT	AP1G1	CLIC2	CYB5B	TTI1	TRAPPC3	DYNC1LI2	DNPH1
TCERG1	GIPC1	OPLAH	SCAMP3	HS3ST1	HAT1	SLC27A2	APOL1	TAX1BP3	ADAM10	LAMA5	STX6	ACOX3	PRPF4	CYB5B	CHMP2A	PSMD3	TIMM44
NDC80	IKBKB	BCKDK	PHYH	UNC13B	CASK	GAK	UNC13B	GIPC1	EI24	ZNF185	SYNGR2	RER1	PHGDH	PRPF4	NCK2	PAPSS1	TRAPPC3
NRP1	TIMM23	MGST3	OPLAH	POLR3A	PLD2	HNRNPDL	POLR3A	IKBKB	TP53I11	CLIC2	ENSA	SURF4	NDUFS4	PHGDH	ZNF207	ZW10	CHMP2A
TNPO2	HAT1	GEMIN2	BCKDK	PSMA7	UQCRQ	XPO1	PSMA7	RGS12	PTGES	ACOX3	NARS1	MAPK13	DYNC1LI2	NDUFS4	NDUFB5	SPINT1	NCK2
HS3ST1	UBE2L6	IRF6	MGST3	SCAMP3	UQCR11	BTAF1	SCAMP3	TIMM23	KMT2D	RER1	MYO1B	SPTLC1	PSMD3	ADAM12	NDUFB3	SART1	NDUFB5
UNC13B	CASK	TAX1BP3	IRF6	PHYH	HGS	ATP2A1	PHYH	HAT1	APAF1	SURF4	NUDT21	SPTLC2	PAPSS1	DYNC1LI2	GET3	DAPK3	NDUFB3
POLR3A	UQCRQ	GIPC1	TAX1BP3	OPLAH	AURKA	SPTBN2	OPLAH	UBE2L6	RIOK3	MAPK13	LANCL1	OGT	ZW10	KLK10	BUB3	TGFB1I1	NDUFA2
PSMA7	UQCR11	IKBKB	GIPC1	BCKDK	RAB29	MAST4	BCKDK	CASK	IMPA2	SPTLC1	STRN	ALOX15B	SART1	PSMD3	ACTN4	HSPA12A	GET3
SCAMP3	HGS	RGS12	IKBKB	MGST3	CLGN	SEC16A	IFIT3	PLD2	MAP2K7	SPTLC2	IDH3B	PMM2	TGFB1I1	PAPSS1	GSTZ1	PPIP5K2	BUB3
PHYH	AURKA	TIMM23	TIMM23	IRF6	VPS26C	PLXNB2	MGST3	UQCRQ	ACOT8	OGT	NRDC	TM9SF1	HSPA12A	ZW10	AP1G1	EEF1E1	SULT1B1
OPLAH	RAB29	HAT1	HAT1	TAX1BP3	PPP1R12A	KHNYN	IRF6	UQCR11	CDIPT	ALOX15B	CALU	INPP4B	PPIP5K2	PRODH	STX6	HNRNPR	ACTN4
BCKDK	VPS26C	UBE2L6	UBE2L6	GIPC1	SLC27A2	TECPR2	TAX1BP3	HGS	PDCD5	PMM2	AHCYL1	HMGB3	EEF1E1	SPINT1	SYNGR2	TXNL1	GSTZ1
MGST3	PPP1R12A	CASK	CASK	IKBKB	GAK	U2SURP	GIPC1	RAB29	PRMT5	TM9SF1	NDUFS5	PPM1G	HNRNPR	B4GALT5	SGTA	TPD52L2	PRKAB2
IRF6	SLC27A2	UQCRQ	PLD2	RGS12	HNRNPDL	SETD1A	IKBKB	VPS26C	NHERF1	HMGB3	PDE6D	EIF3D	TXNL1	SPINT2	ENSA	EMC8	AP1G1
TAX1BP3	GAK	UQCR11	UQCRQ	TIMM23	XPO1	SYNJ2	TIMM23	PPP1R12A	CHEK1	PPM1G	ORC4	EIF3H	TPD52L2	TGFB1I1	NARS1	ERI3	STX6
GIPC1	HNRNPDL	HGS	UQCR11	HAT1	BTAF1	KIF3B	HAT1	SLC27A2	TNFRSF10B	INPPL1	PEX1	BCAT2	EMC8	HSPA12A	MYO1B	EIF4G3	SYNGR2
IKBKB	XPO1	AURKA	CASQ2	UBE2L6	ATP2A1	PFAS	UBE2L6	GAK	FPGT	EIF3D	GMFG	NCAM2	EIF4G3	EEF1E1	NUDT21	PPIH	ENSA
RGS12	BTAF1	RAB29	HGS	CASK	ARHGEF10	DCLK1	CASK	HNRNPDL	TPP1	EIF3H	PPP1R12B	STX7	PPIH	RIPK2	LANCL1	HTRA2	NARS1
TIMM23	ATP2A1	CLGN	AURKA	PLD2	ZNF609	ANKRD28	UQCRQ	XPO1	TCERG1	HDAC3	PRPSAP2	SLC16A3	HTRA2	HNRNPR	B3GALT2	AKR7A2	MYO1B
HAT1	SPTBN2	VPS26C	RAB29	UQCRQ	TRIM66	ARHGEF11	UQCR11	BTAF1	NDC80	BCAT2	SMARCA5	ABCC3	AKR7A2	PRPF3	IDH3B	EPB41L2	NUDT21
UBE2L6	SEC16A	PPP1R12A	CLGN	UQCR11	SPTBN2	PRORP	HGS	ATP2A1	TNPO2	NCAM2	SPAG9	ABCC4	EPB41L2	TXNL1	CALU	TGOLN2	LANCL1
CASK	PLXNB2	SLC27A2	VPS26C	CASQ2	SEC16A	CHUK	RAB29	ARHGEF10	UNC13B	IPO8	KDM1A	MSH4	TGOLN2	TPD52L2	NDUFS5	LAMTOR5	STRN
PLD2	KHNYN	GAK	PPP1R12A	HGS	PLXNB2	LSM1	VPS26C	ZNF609	POLR3A	GRIN2D	NME2P1	P4HA2	LAMTOR5	EMC8	PDE6D	WIPF1	IDH3B
UQCRQ	TECPR2	HNRNPDL	SLC27A2	AURKA	AREL1	NPC1	PPP1R12A	SPTBN2	PSMA7	STX7	PPL	CCL16	SGCE	ERI3	ORC4	SGCE	CALU
UQCR11	U2SURP	XPO1	GAK	RAB29	KHNYN	AGPAT2	SLC27A2	MAST4	SCAMP3	SLC16A3	NRP2	CAPN5	DENR	EIF4G3	PEX1	AKAP10	NDUFS5
CASQ2	SETD1A	BTAF1	HNRNPDL	CLGN	TECPR2	DEGS1	GAK	SEC16A	PHYH	ABCC3	ACSL4	YKT6	XPOT	PPIH	RAD21	DENR	PDE6D
HGS	SYNJ2	ATP2A1	XPO1	VPS26C	U2SURP	SCAMP1	HNRNPDL	PLXNB2	OPLAH	ABCC4	SNX3	ARPC5	DNPH1	HTRA2	GMFG	XPOT	ORC4
AURKA	SYNM	ARHGEF10	BTAF1	PPP1R12A	SETD1A	SCAMP2	XPO1	KHNYN	BCKDK	MSH4	DOK2	POLR2D	TIMM44	AKR7A2	PPP1R12B	DNPH1	PEX1
RAB29	GARRE1	ZNF609	ATP2A1	SLC27A2	PER2	ARPC1B	BTAF1	TECPR2	MGST3	P4HA2	SORBS3	PDPK1	TRAPPC3	PROM1	PRPSAP2	TIMM44	KALRN
CLGN	KIF3B	SPTBN2	ZNF609	GAK	SYNJ2	ARPC2	ATP2A1	U2SURP	IRF6	YKT6	SYNCRIP	TAPBP	CHMP2A	EPB41L2	GNG7	TRAPPC3	GMFG
VPS26C	PFAS	MAST4	SPTBN2	HNRNPDL	KIF3B	ARPC3	ZNF609	SETD1A	TAX1BP3	NUP42	PLOD3	DHX15	NCK2	TGOLN2	SMARCA5	CHMP2A	PPP1R12B
PPP1R12A	DCLK1	SEC16A	SEC16A	XPO1	PFAS	BET1	SPTBN2	SYNJ2	GIPC1	ARPC5	EIF4E2	RNMT	RGS10	WIPF1	SPAG9	NCK2	PRPSAP2
SLC27A2	ANKRD28	PLXNB2	PLXNB2	BTAF1	MCF2L	POLR1C	MAST4	KIF3B	IKBKB	POLR2D	TLR2	ZZEF1	NDUFB5	ATP8B1	OPA1	ZNF207	GNG7
GAK	ARHGEF11	KHNYN	KHNYN	ATP2A1	ANKRD28	TRIM24	SEC16A	PFAS	RGS12	PDPK1	DIAPH1	TTI1	NDUFB3	XPOT	MCM3AP	NDUFB5	SPAG9
HNRNPDL	PRORP	U2SURP	TECPR2	ARHGEF10	ARHGEF11	PGRMC2	PLXNB2	DCLK1	TIMM23	TAPBP	SELENOF	CYB5B	NDUFA2	DNPH1	PPL	NDUFB3	OPA1
XPO1	CHUK	SETD1A	U2SURP	ZNF609	PRORP	CTDSPL	RIMBP2	ANKRD28	HAT1	DHX15	PLIN3	PRPF4	GET3	TIMM44	LY75	GET3	PPL
BTAF1	LSM1	KIF3B	SETD1A	PDZD2	CHUK	VILL	KHNYN	ARHGEF11	UBE2L6	RNMT	UGDH	PHGDH	BUB3	TRAPPC3	SNX3	BUB3	NRP2
ATP2A1	NPC1	PFAS	KDM6B	SPTBN2	LSM1	PFDN6	TECPR2	PRORP	CASK	ZZEF1	LPXN	NDUFS4	SULT1B1	CHMP2A	OGA	SULT1B1	ACSL4
ARHGEF10	AGPAT2	MCF2L	SYNJ2	MAST4	NPC1	WDR46	SEMA3E	CHUK	PLD2	TTI1	CTNND1	DYNC1LI2	ACTN4	NCK2	SORBS3	ACTN4	SNX3
ZNF609	DEGS1	DCLK1	KIF3B	SEC16A	AGPAT2	GSTA4	U2SURP	LSM1	UQCRQ	PLXNB1	SNX2	KLK10	GSTZ1	ZNF207	SYNCRIP	GSTZ1	OGA
TRIM66	ANGPT2	ANKRD28	PFAS	PLXNB2	DEGS1	NKRF	SETD1A	NPC1	UQCR11	PJA2	DPM1	PSMD3	PRKAB2	NDUFB5	GMDS	HTATSF1	SORBS3
PDZD2	SCAMP1	ARHGEF11	DCLK1	AREL1	SCAMP1	GNPAT	SYNJ2	AGPAT2	HGS	SIPA1L1	USO1	PAPSS1	AP1G1	NDUFB3	PLOD3	AP1G1	SYNCRIP
SPTBN2	SCAMP2	PRORP	ANKRD28	KHNYN	SCAMP2	LAMA5	KIF3B	DEGS1	RAB29	CYB5B	TOM1	ZW10	STX6	NDUFA2	DIAPH1	STX6	NEMF
MAST4	KPNA5	CHUK	ARHGEF11	TECPR2	ARPC1B	ZNF185	PFAS	SCAMP1	VPS26C	PRPF4	PFKFB2	SPINT1	SYNGR2	GET3	SELENOF	SYNGR2	PLOD3
SEC16A	ARPC1B	LSM1	PRORP	U2SURP	ARPC2	CASC3	MCF2L	SCAMP2	PPP1R12A	PHGDH	CCDC22	SART1	SGTA	BUB3	EXOC3	SGTA	TLR2
PLXNB2	ARPC2	NPC1	CHUK	SETD1A	ARPC3	ACOX3	DCLK1	ARPC1B	SLC27A2	NDUFS4	PRAF2	TGFB1I1	ENSA	SULT1B1	PLIN3	ENSA	DIAPH1
AREL1	ARPC3	AGPAT2	LSM1	SYNJ2	BET1	RER1	ANKRD28	ARPC2	GAK	DYNC1LI2	DKC1	HSPA12A	NARS1	ACTN4	KPNA6	SLC25A20	SELENOF
KHNYN	BET1	DEGS1	NPC1	GARRE1	POLR1C	SURF4	ARHGEF11	ARPC3	HNRNPDL	KLK10	EIF5B	ARHGEF9	MYO1B	GSTZ1	UGDH	NARS1	EXOC3
TECPR2	POLR1C	SCAMP1	AGPAT2	KIF3B	TRIM24	MAPK13	PRORP	BET1	XPO1	PSMD3	EDF1	PPIP5K2	NUDT21	HTATSF1	CTNND1	MYO1B	PLIN3
U2SURP	TRIM24	SCAMP2	DEGS1	PFAS	PGRMC2	SPTLC1	CHUK	POLR1C	BTAF1	PAPSS1	DNAJA2	EEF1E1	LANCL1	KDELR3	SNX2	NUDT21	KPNA6
SETD1A	PGRMC2	ARPC1B	SCAMP1	DCLK1	CETN3	SPTLC2	LSM1	TRIM24	ATP2A1	ZW10	CUTA	RIPK2	STRN	PRKAB2	DPM1	LANCL1	UGDH
SYNJ2	CETN3	ARPC2	SCAMP2	ANKRD28	VILL	OGT	NPC1	PGRMC2	PIP5K1B	SPINT1	PFDN1	HNRNPR	SLC37A4	AP1G1	USO1	STRN	LPXN
SYNM	PFDN6	ARPC3	KPNA5	ARHGEF11	PFDN6	ALOX15B	AGPAT2	CETN3	ARHGEF10	SART1	PPP1R11	PRPF3	IDH3B	STX6	TOM1	RRP9	CTNND1
KIF3B	WDR46	BET1	ARPC1B	PRORP	WDR46	PMM2	DEGS1	CTDSPL	ZNF609	SPINT2	NOL3	TXNL1	NRDC	SYNGR2	CCDC22	IDH3B	SNX2
PFAS	GSTA4	POLR1C	ARPC2	CHUK	NKRF	TM9SF1	SCAMP1	VILL	SPTBN2	TGFB1I1	FAM20B	TPD52L2	CALU	SGTA	PRAF2	NRDC	DPM1
MCF2L	NKRF	TRIM24	ARPC3	LSM1	GNPAT	INPP4B	SCAMP2	PFDN6	MAST4	AP5Z1	WDR1	EMC8	AHCYL1	ENSA	EIF5B	CALU	USO1
NACAD	GNPAT	PGRMC2	BET1	NPC1	LAMA5	MID1	ARPC1B	WDR46	SEC16A	HSPA12A	ATP9A	ERI3	XPNPEP2	NARS1	EDF1	AHCYL1	TOM1
ANKRD28	LAMA5	CETN3	POLR1C	AGPAT2	ZNF185	HMGB3	ARPC2	GSTA4	PLXNB2	CTIF	N4BP1	THAP12	TYROBP	MYO1B	SH2D1A	TYROBP	PFKFB2
ARHGEF11	CASC3	PFDN6	TRIM24	DEGS1	CASC3	PPM1G	ARPC3	NKRF	KHNYN	MTSS1	ROCK2	EIF4G3	NDUFS5	NUDT21	DNAJA2	NDUFS5	CCDC22
PRORP	ACOX3	WDR46	PGRMC2	SCAMP1	ACOX3	INPPL1	BET1	GNPAT	TECPR2	PPIP5K2	CPNE3	PPIH	PDE6D	LANCL1	CUTA	PDE6D	PRAF2
CHUK	RER1	GSTA4	PFDN6	SCAMP2	RER1	EIF3D	POLR1C	LAMA5	U2SURP	MAP3K7	HIP1R	HTRA2	ORC4	STRN	PFDN1	PEX1	DKC1
LSM1	SURF4	NKRF	WDR46	ARPC1B	SURF4	EIF3H	TRIM24	ZNF185	SETD1A	EEF1E1	DNAJC13	AKR7A2	PEX1	SLC37A4	PPP1R11	RAD21	EIF5B
NPC1	MAPK13	GNPAT	NKRF	ARPC2	MAPK13	HDAC3	PGRMC2	CASC3	TRANK1	RIPK2	PPP6R2	EPB41L2	RAD21	IDH3B	NOL3	ZNRD2	EDF1
AGPAT2	SPTLC1	LAMA5	GNPAT	ARPC3	SPTLC1	NVL	CTDSPL	ACOX3	SYNJ2	HNRNPR	GGCT	TGOLN2	AKR1B10	NRDC	SRGAP2	GMFG	DNAJA2
DEGS1	SPTLC2	ZNF185	KMO	BET1	SPTLC2	BCAT2	VILL	RER1	KIF3B	PRPF3	NDUFS7	LAMTOR5	TIMM8A	CALU	PLXNA2	PPP1R12B	CUTA
SCAMP1	OGT	CASC3	LAMA5	POLR1C	OGT	IPO8	RGL2	SURF4	PFAS	TXNL1	PDCD6	WIPF1	GMFG	AHCYL1	WDR1	PLIN1	PFDN1
SCAMP2	PMM2	ACOX3	ZNF185	TRIM24	PMM2	STX7	PFDN6	MAPK13	MCF2L	TPD52L2	TBCA	SGCE	PRPSAP2	TYROBP	MEGF6	PRPSAP2	PPP1R11
KPNA5	POLR3G	RER1	CASC3	PGRMC2	TM9SF1	SLC16A3	WDR46	SPTLC1	DCLK1	EMC8	ATP6V1G1	AKAP10	SMARCA5	NDUFS5	ATP9A	GNG7	NOL3
ARPC1B	TM9SF1	SURF4	ACOX3	CTDSPL	HMGB3	ABCC4	GSTA4	SPTLC2	ANKRD28	ERI3	VPS4B	DENR	SPAG9	PDE6D	LDB3	SMARCA5	FAM20B
ARPC2	HMGB3	MAPK13	RER1	RGL2	PPM1G	POLR1G	NKRF	OGT	ARHGEF11	EIF4G3	MACROH2A1	XPOT	AQR	CXCL13	N4BP1	KIAA0513	WDR1
ARPC3	TP73	SPTLC1	SURF4	PFDN6	INPPL1	TLR3	GNPAT	ALOX15B	PRORP	PPIH	SH3BGRL	DNPH1	OPA1	ORC4	ROCK2	SPAG9	ATP9A
BET1	PPM1G	SPTLC2	MAPK13	WDR46	FANCA	P4HA2	LAMA5	PMM2	CHUK	HTRA2	FLNB	TIMM44	NME2P1	RAD21	CPNE3	AQR	N4BP1
POLR1C	INPPL1	OGT	SPTLC1	NKRF	EIF3D	CAPN5	ZNF185	TM9SF1	LSM1	AKR7A2	TRIM3	TRAPPC3	PPL	AKR1B10	DNAJC13	OPA1	ROCK2
TRIM24	EIF3D	ALOX15B	SPTLC2	GNPAT	EIF3H	YKT6	CASC3	INPP4B	NPC1	EPB41L2	CS	CHMP2A	GSDME	TIMM8A	PHACTR2	KDM1A	CPNE3
PGRMC2	EIF3H	PMM2	OGT	LAMA5	HDAC3	ARPC5	ACOX3	ATP6V0E1	AGPAT2	TGOLN2	SPAG7	NCK2	NRP2	ZNRD2	PPP6R2	NME2P1	RNF40
RGL2	HDAC3	POLR3G	PMM2	ZNF185	NVL	POLR2D	RER1	MID1	DEGS1	LAMTOR5	SEC22B	TSPAN6	MAN1A2	GMFG	DNAJB6	PPL	DNAJC13
PFDN6	NVL	TM9SF1	TM9SF1	CASC3	BCAT2	PDPK1	SURF4	HMGB3	SCAMP1	B4GAT1	TACC1	PLRG1	PLXNC1	HS6ST1	GGCT	GSDME	PPP6R2
WDR46	BCAT2	HMGB3	INPP4B	MRPS12	BIRC5	TAPBP	MAPK13	PPM1G	SCAMP2	WIPF1	VPS26A	RGS10	ACSL4	PCDH7	NDUFS7	NRP2	DNAJB6
NKRF	IPO8	PPM1G	HMGB3	NDUFA1	TMPRSS2	CLDN3	SPTLC1	INPPL1	KPNA5	SGCE	PMPCB	ZNF207	SNX3	PRPSAP2	TBCA	MPZL2	COQ9
GNPAT	STX7	INPPL1	PPM1G	ACOX3	IPO8	DHX15	SPTLC2	EIF3D	ARPC1B	LAT	PSIP1	NDUFB5	DOK2	SMARCA5	ATP6V1G1	ACSL4	GGCT
LAMA5	TNRC18	FANCA	INPPL1	RER1	STX7	RNMT	OGT	EIF3H	ARPC2	RGS14	ERLIN1	NDUFB3	OGA	SPAG9	VPS4B	SNX3	NDUFS7
ZNF185	SLC16A3	EIF3D	EIF3D	SURF4	TNRC18	ZZEF1	ALOX15B	HDAC3	ARPC3	CA12	NDUFS3	NDUFA2	SORBS3	OPA1	MPDU1	DOK2	NDUFS2
CASC3	SLC31A1	EIF3H	EIF3H	SPTLC1	SLC16A3	ASAP2	PMM2	NVL	BET1	DENR	SRSF10	GET3	SYNCRIP	NME2P1	MACROH2A1	OGA	NIPSNAP2
ACOX3	ABCC3	HDAC3	HDAC3	SPTLC2	SLC31A1	TTI1	TM9SF1	BCAT2	POLR1C	PSTPIP1	HSBP1	BUB3	TPST1	PPL	SH3BGRL	SORBS3	CILP
RER1	ABCC4	NVL	NVL	OGT	ABCC3	PLXNB1	INPP4B	IPO8	TRIM24	XPOT	ECI2	ACTN4	CDC40	GSDME	FLNB	SYNCRIP	TBCA
SURF4	ABCC5	BCAT2	BCAT2	ALOX15B	ABCC5	RRP8	MID1	STX7	PGRMC2	DNPH1	BANF1	GSTZ1	NEMF	LY75	CS	NEMF	ATP6V1G1
MAPK13	POLR1G	YY2	BIRC5	PMM2	POLR1G	SIPA1L1	HMGB3	SLC16A3	CETN3	TIMM44	SF3B1	GATC	GMDS	NRP2	SPAG7	GMDS	VPS4B
SPTLC1	MSH4	BIRC5	IPO8	POLR3G	MSH4	CYB5B	PPM1G	ABCC3	CTDSPL	TRAPPC3	CSDE1	HTATSF1	PLOD3	PLXNC1	SEC22B	PLOD3	MPDU1
SPTLC2	P4HA2	IPO8	STX7	TM9SF1	P4HA2	PRPF4	INPPL1	ABCC4	VILL	CHMP2A	STX11	PRKAB2	EIF4E2	MPZL2	TACC1	TLR2	MACROH2A1
OGT	CAPN5	STX7	TNRC18	CHAD	CAPN5	PHGDH	EIF3D	ABCC5	RGL2	NCK2	MYCBP2	AP1G1	TLR2	SNX3	VPS26A	DIAPH1	SH3BGRL
ALOX15B	YKT6	TNRC18	SLC16A3	HMGB3	YKT6	NDUFS4	EIF3H	POLR1G	PFDN6	PLRG1	LYPLA1	STX6	DIAPH1	DOK2	PMPCB	SELENOF	FLNB
PMM2	NUP42	SLC16A3	SLC31A1	PPM1G	NUP42	GPR39	HDAC3	TLR3	WDR46	RGS10	FCN3	SYNGR2	SELENOF	OGA	PSIP1	EXOC3	CS
TM9SF1	ARPC5	SLC31A1	ABCC3	INPPL1	ARPC5	DYNC1LI2	NVL	MSH4	GSTA4	ZNF207	SNRNP200	SGTA	EXOC3	SORBS3	ERLIN1	PLIN3	SEC22B
HMGB3	POLR2D	ABCC3	ABCC4	EIF3D	POLR2D	KLK10	BCAT2	P4HA2	NKRF	NDUFB5	TIPRL	ENSA	PLIN3	SYNCRIP	GPC4	KPNA6	TACC1
PPM1G	MAFG	ABCC4	ABCC5	EIF3H	FGF10	PSMD3	TMPRSS2	CAPN5	GNPAT	NDUFB3	PPM1B	SLC25A20	KPNA6	GMDS	NDUFS3	UGDH	VPS26A
INPPL1	PDPK1	ABCC5	POLR1G	HDAC3	PDPK1	PAPSS1	IPO8	YKT6	LAMA5	NDUFA2	CRTAP	NARS1	UGDH	PLOD3	CLN5	LPXN	PMPCB
EIF3D	TAPBP	POLR1G	MSH4	NVL	TAPBP	ZW10	STX7	ARPC5	ZNF185	GET3	PALM	MYO1B	LPXN	TLR2	HSBP1	CTNND1	PSIP1
EIF3H	RNF113A	MSH4	P4HA2	BCAT2	KDM6A	PRODH	SLC16A3	POLR2D	CASC3	BUB3	GRAP2	NUDT21	CTNND1	DIAPH1	ECI2	SNX2	ERLIN1
HDAC3	KDM6A	P4HA2	CAPN5	IPO8	CLDN3	SPINT1	SLC31A1	PDPK1	ACOX3	PI15	EIF3G	LANCL1	SNX2	SELENOF	BANF1	DPM1	GPC4
NVL	CLDN3	ST8SIA5	YKT6	STX7	DHX15	SART1	ABCC3	TAPBP	RER1	ACTN4	CBR3	STRN	DPM1	EXOC3	SF3B1	USO1	NDUFS3
BCAT2	DHX15	CAPN5	NUP42	TNRC18	RNMT	SPINT2	ABCC4	KDM6A	SURF4	GSTZ1	PSMD10	AKAP8	USO1	PLIN3	CSDE1	TOM1	SRSF10
IPO8	RNMT	YKT6	ARPC5	SLC16A3	ZZEF1	GPAA1	ABCC5	CLDN3	MAPK13	TRIAP1	ZMPSTE24	IDH3B	TOM1	KPNA6	STX11	PFKFB2	HSBP1
STX7	ZZEF1	NUP42	POLR2D	SLC31A1	ASAP2	TGFB1I1	POLR1G	KCNN4	SPTLC1	HTATSF1	IDH1	NRDC	PFKFB2	UGDH	LYPLA1	CCDC22	ECI2
TNRC18	ASAP2	POLR2D	FGF10	ABCC4	TTI1	SRGAP3	TLR3	DHX15	SPTLC2	PRKAB2	RBBP9	CALU	CCDC22	LPXN	FCN3	PQBP1	BANF1
SLC16A3	TTI1	MAFG	MAFG	ABCC5	RRP8	ZBTB43	P4HA2	RNMT	OGT	AP1G1	STAM2	ATP9B	PQBP1	CTNND1	SNRNP200	PRAF2	SF3B1
SLC31A1	PLXNB1	PDPK1	PDPK1	POLR1G	SIPA1L1	AP5Z1	CAPN5	ZZEF1	ALOX15B	STX6	ARL6IP5	AHCYL1	PRAF2	SNX2	TIPRL	DKC1	CSDE1
ABCC4	RRP8	TAPBP	TAPBP	MSH4	CYB5B	CCP110	YKT6	TTI1	PMM2	SYNGR1	DYSF	TYROBP	DKC1	DPM1	PPM1B	EIF5B	STX11
ABCC5	SIPA1L1	RNF113A	KDM6A	P4HA2	PRPF4	ADCY6	NUP42	PLXNB1	TM9SF1	SYNGR2	BCAS2	NDUFS5	EIF5B	USO1	NUP155	EDF1	PRKRA
POLR1G	CYB5B	CLDN3	CLDN3	CAPN5	PHGDH	PPIP5K2	ARPC5	RRP8	INPP4B	SGTA	DCTN3	PDE6D	EDF1	TOM1	CRTAP	DIAPH2	LYPLA1
MSH4	PRPF4	DHX15	DHX15	YKT6	NDUFS4	MAP3K7	POLR2D	SIPA1L1	MID1	ENSA	DNAJC8	CXCL13	SH2D1A	CCDC22	PALM	DNAJA2	REM1
P4HA2	PHGDH	RNMT	RNMT	NUP42	PHF1	EEF1E1	CFLAR	CYB5B	HMGB3	NARS1	ATP5PD	ORC4	DNAJA2	PQBP1	GRAP2	CUTA	FCN3
CAPN5	NDUFS4	ZZEF1	ZZEF1	ARPC5	GPR39	RIPK2	DDX3Y	PRPF4	TP73	MYO1B	TSPAN9	PEX1	CUTA	PRAF2	ZMYND10	PFDN1	SNRNP200
YKT6	PHF1	TTI1	ASAP2	POLR2D	SEPTIN4	HNRNPR	PDPK1	PHGDH	PPM1G	SSNA1	FLOT1	RAD21	PFDN1	DKC1	EIF3G	PPP1R11	TIPRL
NUP42	DYNC1LI2	PLXNB1	TTI1	FGF10	DYNC1LI2	PRPF3	TAPBP	NDUFS4	INPPL1	NUDT21	ATP5MG	AKR1B10	PPP1R11	EIF5B	CBR3	NBN	PPM1B
ARPC5	PSMD3	RRP8	RRP8	DDX3Y	KLK10	TXNL1	CLDN3	GPR39	EIF3D	LANCL1	MPDZ	ZNRD2	NBN	EDF1	PSMD10	NOL3	NUP155
POLR2D	RBFOX2	PJA2	SIPA1L1	CYP27B1	PSMD3	TPD52L2	KCNN4	DYNC1LI2	EIF3H	STRN	GLRX3	GMFG	NOL3	DIAPH2	ZMPSTE24	FCGR3B	CRTAP
DDX3Y	PAPSS1	SIPA1L1	CYB5B	PDPK1	PAPSS1	EMC8	DHX15	KLK10	HDAC3	AKAP8	WFS1	PRPSAP2	FCGR3B	DNAJA2	IDH1	LILRB5	PALM
MAFG	ZW10	CYB5B	PRPF4	TAPBP	ZW10	SYNJ1	RNMT	PSMD3	NVL	SLC37A4	NEBL	GNG7	LILRB5	CUTA	RBBP9	PLXNA2	GRAP2
CYP27B1	SPINT1	PRPF4	PHGDH	KDM6A	PRODH	FIBP	ZZEF1	PAPSS1	BCAT2	IDH3B	SNCG	SMARCA5	ABCB7	PFDN1	STAM2	FAM20B	EIF3G
PDPK1	SART1	PHGDH	NDUFS4	DHX15	SPINT1	EIF4G3	ASAP2	ZW10	IPO8	NRDC	CIAO1	SPAG9	FAM20B	PPP1R11	ALDH1L1	WDR1	CBR3
TAPBP	SPINT2	NDUFS4	DYNC1LI2	RNMT	SART1	PPIH	TTI1	PRODH	STX7	CALU	PDE5A	AQR	WDR1	NOL3	MMP23B	MEGF6	PSMD10
RNF113A	GPAA1	DYNC1LI2	PSMD3	ZZEF1	SPINT2	HTRA2	PLXNB1	SPINT1	TNRC18	AHCYL1	SRP72	MAST3	ROCK2	FCGR3B	ARL6IP5	ATP9A	ZMPSTE24
KDM6A	TGFB1I1	PSMD3	RBFOX2	ASAP2	GPAA1	KLF4	RRP8	B4GALT5	SLC16A3	TYROBP	DDAH1	OPA1	CPNE3	FAM20B	DYSF	LDB3	IDH1
DHX15	SRGAP3	PAPSS1	PAPSS1	TTI1	AP5Z1	AKR7A2	SIPA1L1	SART1	ABCC3	NDUFS5	MTA2	MCM3AP	RNF40	WDR1	BCAS2	N4BP1	ATRN
RNMT	AP5Z1	SIAH2	ZW10	PLXNB1	HSPA12A	PROM1	CYB5B	SPINT2	ABCC4	PDE6D	USP1	TBC1D4	DNAJC13	ATP9A	DCTN3	ROCK2	RBBP9
ZZEF1	HSPA12A	ZW10	PRODH	RRP8	CCP110	EPB41L2	PRPF4	GPAA1	ABCC5	ORC4	ALDH1A2	NME2P1	PPP6R2	ROCK2	DNAJC8	CPNE3	STAM2
ASAP2	CCP110	SPINT1	SPINT1	SIPA1L1	ADCY6	TGOLN2	PHGDH	TGFB1I1	POLR1G	PEX1	STK10	FADS1	DNAJB6	CPNE3	ATP5PD	RNF40	TNFSF13
TTI1	PPIP5K2	EFS	B4GALT5	CYB5B	PPIP5K2	RAD51C	NDUFS4	SRGAP3	TLR3	RAD21	TPPP	PPL	COQ9	RNF40	TSPAN9	ZC3H11A	DGAT1
PLXNB1	MAP3K7	SART1	SART1	PRPF4	EEF1E1	LAMTOR5	GPR39	AP5Z1	MSH4	AKR1B10	MYO1D	GSDME	GGCT	DNAJC13	FLOT1	CLUH	ARL6IP5
RRP8	DHH	SPINT2	SPINT2	PHGDH	RIPK2	B4GAT1	DYNC1LI2	HSPA12A	P4HA2	ZNRD2	UFL1	LY75	NDUFS7	ADAMTS4	ATP5MG	DNAJC13	DYSF
SIPA1L1	EEF1E1	GPAA1	GPAA1	NDUFS4	WDR62	ATP8B1	KLK10	CCP110	CAPN5	GMFG	SORBS2	NRP2	NDUFS2	DNAJB6	MPDZ	PHACTR2	DCTN3
CYB5B	MSI1	AP5Z1	AP5Z1	PHF1	HNRNPR	FOXO3	PSMD3	PPIP5K2	YKT6	PPP1R12B	SUN1	MAN1A2	ZPR1	COQ9	CPD	PPP6R2	DNAJC8
PRPF4	RIPK2	HSPA12A	HSPA12A	SEPTIN4	PRPF3	CA12	PAPSS1	MAP3K7	NUP42	BNIP3L	PLPBP	PLXNC1	NIPSNAP2	GGCT	GLRX3	DNAJB6	ATP5PD
PHGDH	WDR62	CCP110	PPIP5K2	DYNC1LI2	TXNL1	AKAP10	ZW10	EEF1E1	ARPC5	SOX15	ERLIN2	MPZL2	PDCD6	NDUFS7	WFS1	COQ9	TSPAN9
NDUFS4	HNRNPR	CTIF	MAP3K7	KLK10	TPD52L2	DENR	PRODH	RIPK2	POLR2D	PRPSAP2	PRPF6	ACSL4	TBCA	NDUFS2	NEBL	GGCT	FLOT1
PHF1	PRPF3	PPIP5K2	EEF1E1	PSMD3	EMC8	XPOT	SPINT1	HNRNPR	CFLAR	GNG7	ABCA8	SNX3	ATP6V1G1	ZPR1	SNCG	NDUFS7	ATP5MG
DYNC1LI2	TXNL1	MAP3K7	LYRM1	RBFOX2	COCH	DNPH1	B4GALT5	PRPF3	PDPK1	SMARCA5	FRYL	DOK2	VPS4B	NIPSNAP2	PDE5A	NDUFS2	SASH3
KLK10	TPD52L2	EEF1E1	MSI1	PAPSS1	THAP12	TIMM44	SART1	TXNL1	TAPBP	SPAG9	ENDOD1	OGA	MPDU1	CILP	DDAH1	ZPR1	GLRX3
PSMD3	EMC8	RIPK2	RIPK2	SIAH2	SYNJ1	TRAPPC3	SPINT2	TPD52L2	RNF113A	URB1	GLS	SORBS3	MACROH2A1	PDCD6	MTA2	PDCD6	WFS1
RBFOX2	THAP12	WDR62	WDR62	ZW10	FIBP	CHMP2A	GPAA1	EMC8	KDM6A	AQR	AP2A2	SYNCRIP	SH3BGRL	TBCA	ALDH1A2	TBCA	NEBL
PAPSS1	FIBP	HNRNPR	HNRNPR	SPINT1	EIF4G3	NCK2	TGFB1I1	THAP12	CLDN3	MAST3	SEC31A	TPST1	FLNB	ATP6V1G1	STK10	ATP6V1G1	SNCG
ZW10	EIF4G3	PRPF3	PRPF3	SART1	PPIH	TSPAN6	SRGAP3	FIBP	KCNN4	OPA1	ELP1	CDC40	CS	VPS4B	TPPP	VPS4B	PDE5A
PRODH	PPIH	TXNL1	TXNL1	SPINT2	HTRA2	PLRG1	AP5Z1	EIF4G3	DHX15	KIF1B	UBL3	B4GALT4	SPAG7	MPDU1	KBTBD11	MACROH2A1	SRP72
SPINT1	MBTPS2	TPD52L2	TPD52L2	GPAA1	KLF4	RGS10	ADCY6	PPIH	RNMT	KDM1A	SCEL	NEMF	SEC22B	MACROH2A1	MYO1D	SH3BGRL	CST7
SART1	HTRA2	EMC8	EMC8	DAPK3	OIP5	ZNF207	CTIF	HTRA2	ZZEF1	TBC1D4	VAMP5	GMDS	PRPF40A	SH3BGRL	UFL1	FLNB	DDAH1
SPINT2	AKR7A2	THAP12	COCH	TGFB1I1	AKR7A2	NDUFB5	PPIP5K2	AKR7A2	ASAP2	NME2P1	RTN3	NMT2	TACC1	FLNB	SORBS2	TRIM3	MTA2
GPAA1	EPB41L2	FIBP	THAP12	AP5Z1	PROM1	NDUFB3	MAP3K7	PROM1	TTI1	PPL	LETM1	PLOD3	LRCH4	CS	SUN1	CS	ALDH1A2
DAPK3	TGOLN2	EIF4G3	SYNJ1	HSPA12A	EPB41L2	NDUFC1	EEF1E1	EPB41L2	PLXNB1	GSDME	EPN2	EIF4E2	VPS26A	SEC22B	PLPBP	SPAG7	STK10
TGFB1I1	RAD51C	CBFA2T2	FIBP	CCP110	TGOLN2	NDUFA2	RIPK2	TGOLN2	RRP8	LY75	STBD1	TLR2	PMPCB	PRPF40A	ERLIN2	SEC22B	TPPP
ZBTB43	LAMTOR5	PPIH	EIF4G3	MTSS1	RAD51C	GET3	HNRNPR	LAMTOR5	PJA2	NRP2	ZRANB2	DIAPH1	PSIP1	TACC1	ABCA8	PRPF40A	MYO1D
AP5Z1	B4GAT1	HTRA2	PPIH	PPIP5K2	LAMTOR5	BUB3	PRPF3	ATP8B1	SIPA1L1	MAN1A2	SNX4	SELENOF	ERLIN1	VPS26A	FRYL	TACC1	UFL1
HSPA12A	ATP8B1	KLF4	MBTPS2	MAP3K7	B4GAT1	ACTN4	TXNL1	FOXO3	CYB5B	PLXNC1	LUC7L3	EXOC3	NDUFS3	NDUFB1	ENDOD1	LRCH4	SORBS2
ARHGEF9	FOXO3	AKR7A2	HTRA2	EEF1E1	ATP8B1	GSTZ1	TPD52L2	CA12	PRPF4	MPZL2	APOL3	PLIN3	SRSF10	PMPCB	GLS	VPS26A	SUN1
MTSS1	CA12	EPB41L2	AKR7A2	MSI1	FOXO3	BUD23	EMC8	AKAP10	PHGDH	ACSL4	ATE1	PRMT3	HSBP1	PSIP1	SLCO2B1	PMPCB	PLPBP
PPIP5K2	AKAP10	RAD51C	EPB41L2	RIPK2	AKAP10	TRIAP1	ERI3	DENR	NDUFS4	SNX3	VAPB	KPNA6	ECI2	ERLIN1	AP2A2	PSIP1	ERLIN2
MAP3K7	SYT7	LAMTOR5	TGOLN2	WDR62	SYT7	GATC	THAP12	XPOT	GPR39	DOK2	SNAPIN	UGDH	BANF1	GPC4	SEC31A	ERLIN1	PRPF6
EEF1E1	DENR	B4GAT1	RAD51C	HNRNPR	DENR	HTATSF1	SYNJ1	DNPH1	DYNC1LI2	OGA	MPZL1	LPXN	SF3B1	NDUFS3	YIF1A	GPC4	ABCA8
WDR62	XPOT	MED7	LAMTOR5	PRPF3	XPOT	PRKAB2	FIBP	TIMM44	KLK10	SORBS3	NDUFA10	CTNND1	CSDE1	SRSF10	REC8	NDUFS3	FRYL
HNRNPR	SPRY2	ATP8B1	B4GAT1	TXNL1	DNPH1	AP1G1	EIF4G3	TRAPPC3	PSMD3	SYNCRIP	FKBP9	SNX2	STX11	CLN5	MFN2	SRSF10	ENDOD1
PRPF3	DNPH1	FOXO3	MED7	TPD52L2	SPRY1	STX6	PPIH	CHMP2A	PAPSS1	TPST1	PGLS	DPM1	PRKRA	HSBP1	ELP1	HSBP1	GLS
TXNL1	SPRY1	RNF13	ATP8B1	EMC8	TIMM44	SYNGR1	HTRA2	NCK2	ZW10	CDC40	PAPSS2	USO1	MYCBP2	ECI2	UBL3	ECI2	AP2A2
TPD52L2	TIMM44	CA12	BCL2L11	THAP12	TRAPPC3	SYNGR2	AKR7A2	TSPAN6	PRODH	NEMF	ATG7	TOM1	NPM3	TADA3	SCEL	BANF1	SEC31A
EMC8	TRAPPC3	AKAP10	FOXO3	SYNJ1	CHMP2A	SGTA	PROM1	PLRG1	SPINT1	GMDS	LYPLA2	PFKFB2	LYPLA1	BANF1	NDUFA7	SF3B1	INMT
THAP12	CHMP2A	SYT7	XRCC3	FIBP	NCK2	ENSA	EPB41L2	RGS10	EFS	NMT2	IPO7	CCDC22	CREG1	SF3B1	VAMP5	CSDE1	YIF1A
SYNJ1	NCK2	DENR	CA12	EIF4G3	PLRG1	SLC25A20	TGOLN2	ZNF207	B4GALT5	PLOD3	ARIH2	PQBP1	SERPINB7	CSDE1	LETM1	STX11	ELP1
FIBP	PLRG1	XPOT	AKAP10	PPIH	PRC1	NARS1	LAMTOR5	NDUFB5	SART1	EIF4E2	TNFAIP8	TIMM17B	FCN3	STX11	EPN2	SKAP2	UBL3
EIF4G3	PRC1	SPRY2	SYT7	MBTPS2	ZNF207	MYO1B	B4GAT1	NDUFB3	SPINT2	CCNT2	PGM3	PRAF2	SNRNP200	SKAP2	STBD1	PRKRA	NDUFB8
PPIH	ZNF207	DNPH1	DENR	HTRA2	NDUFB5	SSNA1	ATP8B1	NDUFC1	GPAA1	TLR2	SVIL	DKC1	TIPRL	PRKRA	SNX4	MTRF1	SCEL
MBTPS2	NDUFB5	SPRY1	XPOT	AKR7A2	NDUFB3	SLC25A17	FOXO3	NDUFA2	DAPK3	DIAPH1	AHSA1	EIF5B	PPM1B	PGLYRP1	LUC7L3	NPM3	NDUFA7
SUV39H1	NDUFB3	TIMM44	SPRY2	EPB41L2	NDUFC1	NUDT21	SGCE	GET3	TGFB1I1	SELENOF	SLC34A2	TRIM13	UTP20	NPM3	APOL3	LYPLA1	VAMP5
HTRA2	NDUFC1	TRAPPC3	DNPH1	TGOLN2	NDUFA2	LANCL1	RNF13	BUB3	SRGAP3	EXOC3	APOM	EDF1	NUP155	LYPLA1	ATE1	REM1	LETM1
AKR7A2	NDUFA2	CHMP2A	SPRY3	LAMTOR5	GET3	STRN	CA12	ACTN4	ZBTB43	PLIN3	FMNL1	KIN	RP2	CREG1	VAPB	FCN3	STBD1
EPB41L2	GET3	NCK2	TIMM44	B4GAT1	BUB3	RRP9	AKAP10	GSTZ1	AP5Z1	PRMT3	H6PD	SH2D1A	STK16	SERPINB7	SNAPIN	SNRNP200	SNX4
TGOLN2	BUB3	TSPAN6	TRAPPC3	FOXO3	ACTN4	SCO2	DENR	BUD23	CCP110	KPNA6	SEC24A	DNAJA2	CRTAP	FCN3	MPZL1	TIPRL	LUC7L3
LAMTOR5	PLPP2	PLRG1	CHMP2A	CA12	GSTZ1	AKAP8	XPOT	TRIAP1	CTIF	UGDH	ADGRL2	BRD4	SLC25A12	SNRNP200	NDUFC2	PPM1B	APOL3
B4GAT1	ACTN4	PRC1	NCK2	AKAP10	BUD23	GTPBP6	DNPH1	GATC	MTSS1	LPXN	VNN2	CUTA	PALM	TIPRL	NDUFA10	UTP20	MBD4
FOXO3	GSTZ1	ZNF207	PLRG1	SYT7	HTATSF1	SLC37A4	TIMM44	HTATSF1	PPIP5K2	CTNND1	ETHE1	PFDN1	GRAP2	PPM1B	FKBP9	NUP155	ATE1
XRCC3	BUD23	NDUFB5	PRC1	DENR	PRKAB2	IDH3B	TRAPPC3	PRKAB2	MAP3K7	SNX2	ACSL3	PPP1R11	CDC123	NUP155	PGLS	CRTAP	VAPB
CA12	GATC	NDUFB3	RGS10	XPOT	AP1G1	NRDC	CHMP2A	AP1G1	EEF1E1	DPM1	NFATC1	NBN	RPP40	RP2	PAPSS2	SLC25A12	SNAPIN
AKAP10	HTATSF1	NDUFC1	ZNF207	DNPH1	STX6	CALU	NCK2	STX6	LYRM1	USO1	ASMTL	LILRB5	EIF3G	CRTAP	ATG7	PALM	MPZL1
SYT7	PRKAB2	NDUFA2	NDUFB5	TIMM44	SYNGR1	AHCYL1	TSPAN6	SYNGR1	RIPK2	TOM1	RAB3D	ABCB7	EIF3J	SLC25A12	LYPLA2	CDC123	NDUFA10
DENR	AP1G1	GET3	NDUFB3	TRAPPC3	SYNGR2	ORC5	PLRG1	SYNGR2	WDR62	PFKFB2	OXSR1	PLXNA2	CBR3	ATP6AP2	IPO7	EIF3G	FKBP9
XPOT	STX6	BUB3	NDUFC1	CHMP2A	SGTA	NDUFS5	RGS10	SGTA	HNRNPR	CCDC22	IL33	FAM20B	PSMD10	EIF3G	ARIH2	EIF3J	PGLS
SPRY2	SYNGR1	PLPP2	NDUFA2	PLRG1	LIAS	PDE6D	ZNF207	LIAS	PRPF3	PQBP1	LSM8	WDR1	AP1G2	EIF3J	TNFAIP8	CBR3	PAPSS2
DNPH1	SYNGR2	ACTN4	GET3	PRC1	ENSA	ORC4	NDUFB5	ENSA	TXNL1	TIMM17B	AP2A1	SLIT1	ZMPSTE24	CBR3	PGM3	PSMD10	ATG7
TIMM44	SGTA	GSTZ1	BUB3	RGS10	SLC25A20	PEX1	NDUFB3	NARS1	TPD52L2	PRAF2	RIGI	ATP9A	IDH1	PSMD10	CD2BP2	ZMPSTE24	LYPLA2
TRAPPC3	LIAS	BUD23	PLPP2	ZNF207	NARS1	RAD21	NDUFC1	MYO1B	EMC8	DKC1	STAU1	N4BP1	CYP7B1	AP1G2	SVIL	IDH1	IPO7
CHMP2A	ENSA	TRIAP1	ACTN4	NDUFB5	MYO1B	AKR1B10	NDUFA2	SSNA1	THAP12	EIF5B	CAVIN2	ROCK2	RBBP9	ZMPSTE24	AHSA1	RBBP9	ARIH2
TSPAN6	SLC25A20	HTATSF1	GSTZ1	NDUFB3	SLC25A17	TIMM8A	GET3	SLC25A17	SYNJ1	GAS7	BAG2	CLASP2	DHRS3	IDH1	SLC34A2	STAM2	PGM3
PLRG1	NARS1	PRKAB2	BUD23	NDUFC1	NUDT21	DHX16	BUB3	NUDT21	FIBP	EDF1	BAG3	CPNE3	ARL6IP5	CYP7B1	APOM	DGAT1	CD2BP2
PRC1	MYO1B	AP1G1	GATC	NDUFA2	LANCL1	ZNRD2	ACTN4	LANCL1	EIF4G3	KIN	MAP4K4	RNF40	DYSF	RBBP9	FMNL1	ARL6IP5	SVIL
ZNF207	SLC25A17	STX6	HTATSF1	GET3	STRN	BNIP3L	GSTZ1	STRN	PPIH	DIAPH2	AIFM1	ZC3H11A	BCAS2	STAM2	H6PD	DYSF	AHSA1
NDUFB5	NUDT21	SYNGR1	KDELR3	BUB3	RRP9	MED14	TRIAP1	RRP9	HTRA2	SH2D1A	CLIC3	CLUH	DCTN3	TUSC2	SEC24A	BCAS2	SLC34A2
NDUFB3	LANCL1	SYNGR2	PRKAB2	ACTN4	SCO2	PCDH7	GATC	SCO2	KLF4	DNAJA2	EML2	DNAJC13	DNAJC8	DGAT1	SEC24B	DCTN3	APOM
NDUFC1	STRN	SGTA	AP1G1	GSTZ1	AKAP8	PRPSAP2	HTATSF1	AKAP8	AKR7A2	BRD4	TSPAN15	PHACTR2	SMNDC1	DHRS3	ADGRL2	DNAJC8	PSMG1
NDUFA2	RRP9	LIAS	STX6	BUD23	GTPBP6	SMARCA5	PRKAB2	GTPBP6	PROM1	CUTA	BPNT1	PPP6R2	ATP5PD	ARL6IP5	VNN2	SMNDC1	FMNL1
GET3	SCO2	ENSA	SYNGR1	HTATSF1	SLC37A4	SPAG9	AP1G1	SLC37A4	EPB41L2	TBL1X	DDAH2	DNAJB6	FLOT1	DYSF	MPC2	ATP5PD	H6PD
BUB3	AKAP8	NARS1	SYNGR2	PRKAB2	ZBTB14	URB1	STX6	IDH3B	TGOLN2	HUS1	TXNDC12	XYLB	ATP5MG	BCAS2	ETHE1	TSPAN9	SEC24A
ACTN4	GTPBP6	MYO1B	SGTA	AP1G1	IDH3B	MGRN1	SYNGR1	NRDC	RAD51C	PFDN1	RECK	COQ9	CPD	DCTN3	ACSL3	FLOT1	ADGRL2
GSTZ1	SLC37A4	SLC25A17	LIAS	STX6	NRDC	SIPA1L3	SYNGR2	CALU	LAMTOR5	PPP1R11	NUDT3	GGCT	SASH3	DNAJC8	ASMTL	ATP5MG	VNN2
BUD23	IDH3B	NUDT21	ENSA	SYNGR1	CALU	ZFC3H1	SGTA	AHCYL1	B4GAT1	NBN	AGR2	NDUFS7	GLRX3	SMNDC1	CDS2	MPDZ	ETHE1
GATC	NRDC	LANCL1	NARS1	SYNGR2	AHCYL1	LCMT2	LIAS	KIF1C	ATP8B1	FCGR3B	BCL10	NDUFS2	RSL1D1	ATP5PD	SNAP29	SASH3	ACSL3
HTATSF1	CALU	STRN	MYO1B	SGTA	SLC28A2	AQR	ENSA	ORC5	FOXO3	ABCB7	CLPTM1	ZPR1	WFS1	TSPAN9	OXSR1	GLRX3	ASMTL
KDELR3	AHCYL1	RRP9	SLC25A17	ENSA	KIF1C	OPA1	SLC25A20	NDUFS5	SGCE	PLXNA2	NAPSA	NIPSNAP2	NEBL	FLOT1	IL33	RSL1D1	CDS2
PRKAB2	KIF1C	SCO2	NUDT21	SLC25A20	ORC5	MCM3AP	NARS1	PDE6D	CA12	IGSF3	PEX11B	CILP	SEC14L2	ATP5MG	LSM8	WFS1	RAB3D
AP1G1	ORC5	AKAP8	LANCL1	NARS1	NDUFS5	KIF1B	MYO1B	ORC4	AKAP10	FAM20B	PAK4	TBCA	SNCG	CPD	AP2A1	NEBL	OXSR1
STX6	CHST1	GTPBP6	STRN	MYO1B	PDE6D	MAPKBP1	SSNA1	PEX1	DENR	EFCAB14	ACTL6A	ATP6V1G1	CIAO1	SASH3	RIGI	NEURL1	GGPS1
SYNGR1	NDUFS5	SLC37A4	RRP9	SSNA1	ORC4	KDM1A	SLC25A17	RAD21	XPOT	WDR1	CYB5A	VPS4B	PDE5A	GLRX3	STAU1	SNCG	LSM8
SYNGR2	PDE6D	ZBTB14	SCO2	SLC25A17	PEX1	TBC1D4	NUDT21	AKR1B10	DNPH1	ATP9A	ADH1B	MPDU1	DFFB	RSL1D1	CAVIN2	CIAO1	AP2A1
SGTA	ORC4	IDH3B	AKAP8	NUDT21	RAD21	NME2P1	LANCL1	TIMM8A	TIMM44	N4BP1	LDHA	MACROH2A1	SRP72	NEBL	BAG2	PDE5A	RIGI
ENSA	PEX1	NRDC	GTPBP6	LANCL1	AKR1B10	FADS1	STRN	DHX16	TRAPPC3	ROCK2	ALDH1A1	SH3BGRL	CST7	SEC14L2	BAG3	SRP72	STAU1
SLC25A20	RAD21	CALU	SLC37A4	STRN	TIMM8A	PPL	RRP9	ZNRD2	CHMP2A	CLASP2	GLUD1	FLNB	DDAH1	SNCG	MLYCD	CST7	CAVIN2
NARS1	AKR1B10	AHCYL1	IDH3B	RRP9	KALRN	GSDME	SCO2	BNIP3L	NCK2	CPNE3	CYB5R3	NCOR1	RECQL5	CIAO1	CRYZL1	DDAH1	BAG2
SPOP	TIMM8A	EXTL3	NRDC	SCO2	DHX16	MAN1A2	AKAP8	MED14	PSCA	ATG13	GSR	VAMP4	MTA2	PDE5A	AIFM1	URI1	BAG3
MYO1B	DHX16	ORC5	CALU	AKAP8	ZNRD2	MPZL2	GTPBP6	PCDH7	TSPAN6	HIP1R	MT-CO1	NDUFS6	STK10	SRP72	CLIC3	B3GAT3	MLYCD
SSNA1	ZNRD2	NDUFS5	AHCYL1	GTPBP6	MED14	ACSL4	SLC37A4	PRPSAP2	PLRG1	RNF40	MT-CO2	TRIM3	GFPT2	DDAH1	EML2	MTA2	CRYZL1
SLC25A17	BNIP3L	PDE6D	KIF1C	SLC37A4	PRPSAP2	SNX3	IDH3B	SMARCA5	RGS10	ZC3H11A	SOD1	CS	TPPP	B3GAT3	TSPAN15	ALDH1A2	AIFM1
NUDT21	MED14	ORC4	EXTL3	IDH3B	SMARCA5	STX10	NRDC	SPAG9	ZNF207	CLUH	CP	SPAG7	SLIT2	MTA2	BPNT1	STK10	CLIC3
LANCL1	SOX15	PEX1	ORC5	NRDC	ADCY3	OGA	CALU	ZNF292	NDUFB5	TSC22D2	F13A1	SEC22B	LTN1	STK10	DDAH2	TPPP	EML2
STRN	PRPSAP2	RAD21	NDUFS5	CALU	KIAA0513	SORBS3	AHCYL1	URB1	NDUFB3	DNAJC13	PNP	PRPF40A	TOMM70	SLIT2	MPIG6B	SLIT2	BPNT1
RRP9	SMARCA5	AKR1B10	PDE6D	EDIL3	SPAG9	SYNCRIP	KIF1C	MGRN1	NDUFC1	PHACTR2	HPRT1	TACC1	MYO1D	TOMM70	ABHD16A	KBTBD11	DDAH2
SCO2	ADCY3	TIMM8A	ORC4	AHCYL1	URB1	CDC40	ORC5	SIPA1L3	NDUFA2	PPP6R2	GOT2	LRCH4	UFL1	MYO1D	TXNDC12	LTN1	ABHD16A
AKAP8	SPAG9	DHX16	PEX1	KIF1C	MGRN1	RANBP6	NDUFS5	ZFC3H1	GET3	CNOT3	PGK1	VPS26A	SORBS2	SEC24D	RECK	TOMM70	TXNDC12
GTPBP6	ZNF292	ZNRD2	RAD21	EXTL3	SIPA1L3	NEMF	PDE6D	LCMT2	BUB3	ANKRD17	AK1	NDUFB1	UBXN7	UFL1	NUDT3	MYO1D	RECK
SLC37A4	URB1	BNIP3L	AKR1B10	ORC5	ZFC3H1	GMDS	ORC4	AQR	PLPP2	DNAJB6	F2	PMPCB	SUN1	SORBS2	AGR2	UFL1	NUDT3
IDH3B	SIPA1L3	MED14	TIMM8A	NDUFS5	LCMT2	NMT2	PEX1	CEP104	ACTN4	COQ9	C1R	MED24	PLPBP	TMEM63A	BCL10	SORBS2	AGR2
NRDC	ZFC3H1	SOX15	DHX16	PDE6D	LZTS3	CCNT1	RAD21	OPA1	GSTZ1	GGCT	HP	PSIP1	ERLIN2	UBXN7	CLPTM1	SUN1	BCL10
CALU	AQR	PRPSAP2	ZNRD2	ORC4	AQR	PLOD3	AKR1B10	MCM3AP	BUD23	NDUFS7	HPR	ERLIN1	ABCA8	PLPBP	MOCS2	PLPBP	NDUFB10
ATP9B	OPA1	SMARCA5	BNIP3L	PEX1	OPA1	EIF4E2	TIMM8A	KIF1B	TRIAP1	NDUFS2	F9	GPC4	PCF11	ERLIN2	TOMM40	ERLIN2	TOMM40
AHCYL1	MCM3AP	ADCY3	MED14	RAD21	MCM3AP	CCNT2	DHX16	KDM1A	HTATSF1	ZPR1	F10	NDUFS3	FRYL	PRPF6	NAPSA	PRPF6	NAPSA
KIF1C	KIF1B	SPAG9	PRPSAP2	AKR1B10	MARCHF6	TLR5	ZNRD2	TBC1D4	PRKAB2	NIPSNAP2	PLG	SRSF10	ENDOD1	FRYL	PAK4	ABCA8	PEX11B
PRICKLE3	MARCHF6	ZNF292	SMARCA5	TIMM8A	KDM1A	TLR2	BNIP3L	NME2P1	AP1G1	CILP	CFB	HSBP1	GLS	ENDOD1	WNT11	PCF11	WNT11
EXTL3	KDM1A	URB1	ADCY3	DHX16	TBC1D4	DIAPH1	SH3BP5	FADS1	STX6	PDCD6	ADA	ECI2	USP19	GLS	ACTL6A	FRYL	ACTL6A
ORC5	TBC1D4	MGRN1	SPAG9	ZNRD2	NME2P1	SELENOF	MED14	PPL	SYNGR1	TBCA	CA1	BANF1	AP2A2	AP2A2	CYB5A	ENDOD1	CYB5A
NDUFS5	NME2P1	SIPA1L3	ZNF292	BNIP3L	FADS1	TSPAN3	PCDH7	GSDME	SYNGR2	ATP6V1G1	CA2	SF3B1	SEC31A	SEC31A	ADH1B	GLS	ADH1B
PDE6D	FADS1	ZFC3H1	URB1	MED14	PPL	EXOC3	PRPSAP2	LY75	SGTA	VPS4B	ASS1	CSDE1	CLSTN1	CLSTN1	ADH1C	SLCO2B1	LDHA
ORC4	PPL	LCMT2	MGRN1	SOX15	GSDME	PLIN3	SMARCA5	MAN1A2	LIAS	ENTPD3	SERPINC1	STX11	YIF1A	YIF1A	LDHA	AP2A2	ALDH1A1
PEX1	GSDME	KATNIP	SIPA1L3	PRPSAP2	EVI5	SLC16A7	GPRIN2	MPZL2	ENSA	ENTPD5	SERPINA1	SKAP2	MFN2	PRSS23	ALDH1A1	SEC31A	GLUD1
RAD21	NRP2	AQR	ZFC3H1	SMARCA5	LY75	PRMT3	SPAG9	ACSL4	SLC25A20	MACROH2A1	SERPINA3	PRKRA	ELP1	SCAF4	GLUD1	YIF1A	CYB5R3
TIMM8A	MAN1A2	OPA1	AQR	ADCY3	MAN1A2	KPNA6	URB1	SNX3	NARS1	SH3BGRL	AGT	RPS6KA5	NDUFB8	UBE4B	CYB5R3	MFN2	GSR
DHX16	MPZL2	MCM3AP	MAST3	KIAA0513	MPZL2	UGDH	MGRN1	STX10	MYO1B	FLNB	A2M	MYCBP2	SCEL	ELP1	GSR	UBE4B	MT-CO1
ZNRD2	ACSL4	KIF1B	OPA1	SPAG9	ACSL4	CTNND1	SIPA1L3	OGA	SSNA1	NCOR1	C3	NPM3	NDUFA7	NDUFA3	MT-CO1	ELP1	MT-CO2
TMPRSS11D	SNX3	MARCHF6	MCM3AP	ZNF292	SNX3	ICMT	ZFC3H1	ADCY9	SLC25A17	VAMP4	C5	LYPLA1	VAMP5	NDUFB8	MT-CO2	NDUFB8	SOD1
BNIP3L	STX10	KDM1A	MARCHF6	URB1	STX10	SNX2	LZTS3	SORBS3	NUDT21	NDUFS6	KNG1	ERAL1	RTN3	SCEL	SOD1	SCEL	CP
MED14	OGA	TBC1D4	KDM1A	SIPA1L3	OGA	DPM1	AQR	SYNCRIP	LANCL1	CS	JCHAIN	CREG1	LETM1	NDUFA7	CP	CACNA1H	F13A1
PCDH7	ADCY9	NME2P1	TBC1D4	ZFC3H1	SYNCRIP	USO1	OPA1	CDC40	STRN	SPAG7	IGKV1-5	SERPINB7	STBD1	VAMP5	F13A1	NDUFA7	PNP
SOX15	SORBS3	FADS1	NME2P1	AQR	TPST1	MRPS14	MCM3AP	NEMF	RRP9	SEC22B	IGKV3-20	FCN3	ZRANB2	RTN3	PNP	VAMP5	HPRT1
PRPSAP2	SYNCRIP	PPL	FADS1	OPA1	CDC40	TOM1	PIP5K1C	GMDS	SCO2	PRPF40A	IGLV1-47	SNRNP200	SNX4	LETM1	HPRT1	RTN3	GOT2
SMARCA5	CDC40	GSDME	PPL	MCM3AP	B4GALT4	PFKFB2	KIF1B	NMT2	AKAP8	TACC1	IGLV6-57	TIPRL	LUC7L3	EPN2	GOT2	LETM1	PGK1
ADCY3	RANBP6	NRP2	EVI5	KIF1B	NEMF	CCDC22	MAPKBP1	CCNT1	GTPBP6	LRCH4	CD8A	RPS6KA4	ATE1	STBD1	EGFR	EPN2	AK1
SPAG9	NEMF	MAN1A2	MAN1A2	MARCHF6	GMDS	PQBP1	MARCHF6	PLOD3	SLC37A4	VPS26A	IGHV3-7	PPM1B	VAPB	ZRANB2	PGK1	STBD1	F2
URB1	GMDS	MPZL2	MPZL2	KDM1A	NMT2	TIMM17B	KDM1A	EIF4E2	ZBTB14	NDUFB1	IGHV2-5	UTP20	SNAPIN	SNX4	AK1	SNX4	C1R
SIPA1L3	NMT2	ACSL4	ACSL4	TBC1D4	CCNT1	PRAF2	TBC1D4	CCNT2	IDH3B	PMPCB	PIGR	NUP155	MPZL1	LUC7L3	HP	LUC7L3	HP
ZFC3H1	CCNT1	SNX3	SNX3	NME2P1	BUB1B	DKC1	NME2P1	TLR5	NRDC	PSIP1	IGKC	RP2	NDUFC2	VAPB	HPR	APOL3	HPR
AQR	BUB1B	STX10	STX10	FADS1	PLOD3	EIF5B	FADS1	TLR2	CALU	ERLIN1	IGHG1	STK16	NDUFA10	SNAPIN	F9	ATE1	F9
OPA1	PLOD3	OGA	OGA	PPL	EIF4E2	EDF1	PPL	DIAPH1	AHCYL1	GPC4	IGHG2	CRTAP	FKBP9	MPZL1	PLG	VAPB	F10
MCM3AP	EIF4E2	SYNCRIP	SYNCRIP	GSDME	CCNT2	KIN	GSDME	SELENOF	KIF1C	NDUFS3	IGHG3	SLC25A12	PGLS	NDUFC2	CFB	SNAPIN	CFD
KIF1B	CCNT2	CDC40	CDC40	NRP2	DIAPH1	DIAPH2	EVI5	TSPAN3	EXTL3	SRSF10	IGHG4	PALM	PAPSS2	NDUFA10	ADA	MPZL1	PLG
MARCHF6	TLR5	B4GALT4	B4GALT3	MAN1A2	SELENOF	DNAJA2	LY75	EXOC3	ORC5	HSBP1	IGHM	GRAP2	ATG7	FKBP9	MT-ATP6	NDUFC2	F12
KDM1A	DIAPH1	RANBP6	RANBP6	MPZL2	EXOC3	BRD4	MAN1A2	PLIN3	NDUFS5	ECI2	IGHA1	CDC123	TRIM16	PGLS	CA1	NDUFA10	CFB
TBC1D4	SELENOF	NEMF	NEMF	ACSL4	PLIN3	CUTA	MPZL2	SLC16A7	PDE6D	BANF1	IGHA2	RPP40	LYPLA2	PAPSS2	CA2	FKBP9	CA1
NME2P1	EXOC3	GMDS	GMDS	SNX3	SLC16A7	PFDN1	ACSL4	PRMT3	ORC4	SF3B1	HLA-B	EIF3G	IPO7	ATG7	ASS1	PGLS	CA2
FADS1	PLIN3	NMT2	NMT2	STX10	PRMT3	PPP1R11	SNX3	KPNA6	PEX1	CSDE1	HLA-DRA	EIF3J	ARIH2	TRIM16	SERPINC1	PAPSS2	ASS1
PPL	PRMT3	CCNT1	CCNT1	OGA	KPNA6	RNASEH1	STX10	SRPX2	RAD21	STX11	HLA-DRB1	CBR3	TNFAIP8	LYPLA2	SERPINA1	ATG7	SERPINC1
GSDME	KPNA6	PLOD3	BUB1B	ADCY9	UGDH	NBN	OGA	UGDH	AKR1B10	SKAP2	HLA-DQB1	PSMD10	PGM3	IPO7	SERPINA3	TACC2	SERPINA1
NRP2	UGDH	EIF4E2	PLOD3	SORBS3	CTNND1	NOL3	ADCY9	CTNND1	TIMM8A	PRKRA	HBZ	AP1G2	CD2BP2	TNFAIP8	AGT	LYPLA2	SERPINA3
MAN1A2	CTNND1	CCNT2	EIF4E2	SYNCRIP	ICMT	DTNB	SORBS3	ICMT	DHX16	MYCBP2	HBD	ZMPSTE24	SVIL	PGM3	A2M	IPO7	AGT
MPZL2	ICMT	DIAPH1	CCNT2	TPST1	MAGEC1	RNGTT	SYNCRIP	SNX2	ZNRD2	NPM3	COL1A1	IDH1	AHSA1	MOCS3	C3	ARIH2	A2M
ACSL4	MAGEC1	SELENOF	TLR5	CDC40	PLA2G6	ABCB7	CDC40	DPM1	BNIP3L	LYPLA1	COL3A1	GATB	SLC34A2	CD2BP2	C5	TNFAIP8	C3
SNX3	PLA2G6	TSPAN3	TLR2	RANBP6	SNX2	PLCH2	RANBP6	USO1	MED14	CREG1	LMNA	CYP7B1	APOM	TNFRSF6B	CST3	MAP3K6	C5
STX10	SNX2	EXOC3	DIAPH1	NEMF	DPM1	PLXNA2	NEMF	MRPS14	PCDH7	SERPINB7	SPTA1	RBBP9	PARN	SVIL	KNG1	PGM3	TIMP1
OGA	DPM1	PLIN3	SELENOF	GMDS	USO1	IGSF3	GMDS	TOM1	SOX15	FCN3	APOA1	STAM2	PSMG1	AHSA1	NRAS	CD2BP2	CST3
ADCY9	USO1	PRMT3	EXOC3	NMT2	MRPS14	FAM20B	NMT2	PFKFB2	PRPSAP2	SNRNP200	APOE	TNFSF13	FMNL1	SLC34A2	HRAS	SVIL	CSTA
SORBS3	MRPS14	KPNA6	PLIN3	CCNT1	TOM1	WDR1	CCNT1	CCDC22	SMARCA5	TIPRL	APOA2	DGAT1	SGPL1	APOM	KRAS	AHSA1	KNG1
SYNCRIP	TOM1	UGDH	SLC16A7	BUB1B	PFKFB2	ATP9A	PLOD3	PQBP1	SPAG9	RPS6KA4	APOC1	DHRS3	ABCA1	PSMG1	TGFB1	SLC34A2	NRAS
CDC40	PFKFB2	CTNND1	PRMT3	PLOD3	CCDC22	N4BP1	EIF4E2	TIMM17B	URB1	PPM1B	APOC2	ARL6IP5	H6PD	FMNL1	JCHAIN	APOM	JCHAIN
RANBP6	CCDC22	ICMT	KPNA6	EIF4E2	PQBP1	ROCK2	CCNT2	PRAF2	MGRN1	NUP155	APOC3	DYSF	SEC24A	SGPL1	CD8A	PSMG1	IGKV1-5
NEMF	PQBP1	MAGEC1	UGDH	CCNT2	TIMM17B	CLASP2	TLR5	DKC1	SIPA1L3	RP2	FGA	BCAS2	SEC24B	CLDN7	IGHV3-7	FMNL1	IGLV1-47
GMDS	TIMM17B	SNX2	TPST2	DIAPH1	PRAF2	CPNE3	TLR2	EIF5B	ZFC3H1	STK16	FGB	DCTN3	VNN2	H6PD	PIGR	SGPL1	IGLV1-40
NMT2	PRAF2	DPM1	CTNND1	SELENOF	DKC1	DEPDC5	DIAPH1	EDF1	LCMT2	WDHD1	FGG	DNAJC8	NADK	SEC24A	IGKC	CLDN7	IGLV2-14
CCNT1	DKC1	USO1	ICMT	EXOC3	EIF5B	ICOSLG	SELENOF	KIN	KATNIP	CRTAP	SLC4A1	SMNDC1	MPC2	SEC24B	IGHG1	H6PD	IGLV2-11
PLOD3	EIF5B	MRPS14	SNX2	PLIN3	TRIM13	HIP1R	TSPAN3	DIAPH2	AQR	SLC25A12	APCS	ATP5PD	ETHE1	VNN1	IGHG2	SEC24A	IGLV2-8
EIF4E2	EDF1	TOM1	DPM1	PRMT3	EDF1	RNF40	EXOC3	DNAJA2	MAST3	PALM	C1QB	TSPAN9	ACSL3	VNN2	IGHG3	SEC24B	IGLV6-57
CCNT2	KIN	PFKFB2	USO1	KPNA6	KIN	PHF2	PLIN3	BRD4	OPA1	ATP6AP2	C1QC	FLOT1	STAMBP	TDP2	IGHG4	VNN2	CD8A
TLR5	DIAPH2	CCDC22	MRPS14	SRPX2	DIAPH2	ZC3H11A	SLC16A7	CUTA	MCM3AP	GRAP2	C9	ATP5MG	ASMTL	ETHE1	IGHM	ETHE1	IGHV3-7
DIAPH1	DNAJA2	PQBP1	TOM1	UGDH	DNAJA2	CLUH	PRMT3	PFDN1	PIP5K1C	RNASEH2A	APOH	CPD	CDS2	ACSL3	IGHA1	ACSL3	PIGR
SELENOF	BRD4	TIMM17B	PFKFB2	CTNND1	BRD4	DNAJC13	KPNA6	PPP1R11	KIF1B	CDC123	LRG1	SASH3	RAB3D	STAMBP	IGHA2	PCNT	IGKC
EXOC3	CUTA	PRAF2	CCDC22	ICMT	CUTA	PPP6R2	SRPX2	NBN	MAPKBP1	RPP40	FN1	GLRX3	SNAP29	ASMTL	HLA-B	STAMBP	IGHG1
PLIN3	SMPD2	DKC1	PQBP1	SNX2	HUS1	CNOT3	UGDH	NOL3	KDM1A	EIF3G	RBP4	RSL1D1	OXSR1	CDS2	HLA-DRA	ASMTL	IGHG2
PRMT3	HUS1	EIF5B	TIMM17B	DPM1	PFDN1	ANKRD17	CTNND1	DTNB	TBC1D4	EIF3J	AMBP	WFS1	GGPS1	RAB3D	HLA-DQA1	CDS2	IGHG3
KPNA6	PFDN1	TRIM13	PRAF2	USO1	PPP1R11	SIN3B	ICMT	RNGTT	NME2P1	CBR3	ORM1	SEC14L2	HSPA4L	SNAP29	HLA-DRB1	RAB3D	IGHG4
SRPX2	PPP1R11	EDF1	DKC1	MRPS14	RNASEH1	ATP2C2	SNX2	ABCB7	FADS1	PSMD10	AHSG	SNCG	LSM8	OXSR1	HLA-DQB1	SNAP29	IGHM
UGDH	RNASEH1	KIN	EIF5B	TOM1	NBN	DNAJB6	DPM1	PLCH2	PPL	AP1G2	TTR	CIAO1	AP2A1	GGPS1	HBD	OXSR1	IGHA1
TPST2	NBN	DIAPH2	EDF1	PFKFB2	NOL3	COQ9	USO1	PLXNA2	GSDME	ZMPSTE24	ALB	PDE5A	RIGI	PTBP3	COL1A1	IL33	IGHA2
CTNND1	NOL3	DNAJA2	KIN	CCDC22	DTNB	GGCT	MRPS14	IGSF3	EVI5	IDH1	AFP	DFFB	STAU1	LSM8	COL3A1	LSM8	HLA-B
ICMT	DTNB	BRD4	DIAPH2	PQBP1	RNGTT	NDUFS7	TOM1	FAM20B	LY75	GATB	GC	SRP72	CAVIN2	AP2A1	COL4A1	AP2A1	HLA-DRA
SNX2	RNGTT	CUTA	DNAJA2	TIMM17B	ABCB7	NDUFS2	PFKFB2	WDR1	MAN1A2	CYP7B1	PPBP	DDAH1	BAG2	RIGI	LMNA	RIGI	HLA-DQA1
DPM1	ABCB7	HUS1	BRD4	PRAF2	IGSF3	ZPR1	CCDC22	ATP9A	MPZL2	RBBP9	TFRC	MTA2	BAG3	STAU1	SPTA1	STAU1	HLA-DRB1
USO1	PLXNA2	PFDN1	CUTA	DKC1	FAM20B	NIPSNAP2	PQBP1	N4BP1	ACSL4	STAM2	TF	USP1	MAP4K4	CAVIN2	APOA1	CAVIN2	HLA-DQB1
MRPS14	IGSF3	PPP1R11	SMPD2	EIF5B	DENND4B	PDCD6	TIMM17B	ROCK2	SNX3	DGAT1	LTF	ALDH1A2	MLYCD	BAG2	APOE	BAG2	HBZ
TOM1	FAM20B	RNASEH1	PFDN1	EDF1	EFCAB14	TBCA	PRAF2	CLASP2	STX10	CCNK	HPX	STK10	CRYZL1	BAG3	APOA2	BAG3	HBD
PFKFB2	DENND4B	NBN	RNASEH1	KIN	WDR1	ATP6V1G1	DKC1	CPNE3	OGA	ARL6IP5	FTL	TPPP	AIFM1	MAP4K4	APOC1	MAP4K4	MB
CCDC22	EFCAB14	NOL3	NBN	DIAPH2	ATP9A	VPS4B	EIF5B	ATG13	ADCY9	DYSF	FTH1	LTN1	EML2	MLYCD	APOC2	MLYCD	COL1A1
PQBP1	WDR1	DTNB	NOL3	DNAJA2	ROCK2	MPDU1	TRIM13	ICOSLG	SORBS3	BCAS2	ANG	TOMM70	TSPAN15	CRYZL1	APOC3	CRYZL1	COL3A1
TIMM17B	FZD7	RNGTT	DTNB	BRD4	CLASP2	ENTPD3	EDF1	HIP1R	SYNCRIP	DNAJC8	KLKB1	DDHD2	BPNT1	AIFM1	FGA	AIFM1	CRYAB
PRAF2	N4BP1	ABCB7	RNGTT	CUTA	PTCD1	ENTPD5	KIN	RNF40	TPST1	SMNDC1	C4BPA	MYO1D	DDAH2	CLDN1	FGB	CLIC3	LMNA
DKC1	ROCK2	PLXNA2	ABCB7	SMPD2	COBL	MACROH2A1	DIAPH2	PHF2	CDC40	ATP5PD	VTN	SEC24D	ABHD16A	CLIC3	FGG	EML2	SPTA1
EIF5B	CLASP2	IGSF3	SRGAP2	TBL1X	CPNE3	SH3BGRL	DNAJA2	ZC3H11A	RANBP6	TSPAN9	CAT	UFL1	C6orf47	EML2	SLC4A1	TSPAN15	APOA1
EDF1	PTCD1	FAM20B	PLXNA2	PFDN1	DEPDC5	FLNB	BRD4	CLUH	NEMF	FLOT1	GBA1	UBXN7	TXNDC12	TSPAN15	APCS	BPNT1	APOE
KIN	CPNE3	DENND4B	FAM20B	PPP1R11	ICOSLG	NCOR1	CUTA	DNAJC13	GMDS	ATP5MG	FUCA1	SUN1	IGSF6	BPNT1	C1QB	DDAH2	APOA2
DIAPH2	ATG13	EFCAB14	EFCAB14	RNASEH1	PPFIA3	NDUFS6	SMPD2	PPP6R2	NMT2	CPD	PROC	PLPBP	NUDT3	FADS2	C1QC	C6orf47	APOC1
DNAJA2	ICOSLG	FKTN	FKTN	NBN	HIP1R	PEX14	PFDN1	CNOT3	CCNT1	SASH3	ALDOA	ERLIN2	AGR2	DDAH2	C9	TXNDC12	APOC2
BRD4	HIP1R	WDR1	ADAM23	RNGTT	RNF40	CS	PPP1R11	ANKRD17	PLOD3	GLRX3	CSTB	PRPF6	BCL10	TXNDC12	LRG1	RECK	APOC3
CUTA	RNF40	ATP9A	WDR1	ABCB7	PHF2	SPAG7	NBN	SIN3B	EIF4E2	KRT36	ANXA1	PCF11	NDUFB10	EFEMP2	FN1	MBD3	FGA
SMPD2	PHF2	N4BP1	FZD7	PLXNA2	ZC3H11A	SEC22B	NOL3	ATP2C2	CCNT2	RSL1D1	APOB	FRYL	TOMM40	MBD3	RBP4	NUDT3	FGB
TBL1X	ZC3H11A	ROCK2	ATP9A	IGSF3	CLUH	PRPF40A	DTNB	DNAJB6	TLR5	WFS1	SOD2	ENDOD1	PEX11B	NUDT3	AMBP	AGR2	FGG
HUS1	CLUH	CLASP2	N4BP1	FAM20B	KDM4A	CDC45	RNGTT	TMEM127	TLR2	NEBL	OAT	GLS	ACTL6A	AGR2	ORM1	BCL10	SLC4A1
PFDN1	DNAJC13	PTCD1	ROCK2	DENND4B	DNAJC13	MOSPD3	ABCB7	COQ9	DIAPH1	SEC14L2	HRG	FBXO21	CYB5A	BCL10	AHSG	NDUFB10	CRP
PPP1R11	PPP6R2	CPNE3	CLASP2	EFCAB14	PPP6R2	LRCH4	PLCH2	GGCT	SELENOF	CIAO1	THY1	SLCO2B1	ADH1B	NDUFB10	TTR	CLPTM1	APCS
RNASEH1	CNOT3	ATG13	PTCD1	WDR1	CNOT3	MTX2	SRGAP2	NDUFS7	EXOC3	PDE5A	A1BG	USP19	LDHA	CLPTM1	ALB	TOMM40	C1QB
NBN	ANKRD17	ICOSLG	CPNE3	ATP9A	ANKRD17	VPS26A	PLXNA2	NDUFS2	PLIN3	DFFB	CD74	AP2A2	ALDH1A1	MOCS2	AFP	NAPSA	C1QC
NOL3	DNAJB6	HIP1R	DEPDC5	N4BP1	SIN3B	NDUFB1	NOS1AP	ZPR1	SLC16A7	SRP72	KRT1	SEC31A	GLUD1	TOMM40	GC	PEX11B	C9
DTNB	XYLB	RNF40	ATG13	ROCK2	ATP2C2	PMPCB	FAM20B	NIPSNAP2	PRMT3	CST7	VWF	CLSTN1	CYB5R3	NAPSA	PPBP	PAK4	APOH
RNGTT	LRP5	PHF2	ICOSLG	CLASP2	DNAJB6	SAP30	EFCAB14	PDCD6	KPNA6	DDAH1	GAPDH	HEXIM1	GSR	WNT11	TFRC	ACTL6A	LRG1
ABCB7	COQ9	ZC3H11A	HIP1R	PTCD1	XYLB	MED24	WDR1	TBCA	UGDH	URI1	ASL	YIF1A	MT-CO1	ACTL6A	TF	CYB5A	FN1
KIF21B	GGCT	CLUH	RNF40	CPNE3	COQ9	KATNA1	ATP9A	ATP6V1G1	CTNND1	STK17B	HLA-A	NDUFB6	MT-CO2	MT-CYB	LTF	ADH1B	RBP4
PLCH2	NDUFS7	CAND2	PHF2	DEPDC5	GGCT	PSIP1	N4BP1	VPS4B	ICMT	MTA2	HLA-DPB1	MFN2	SOD1	CYB5A	HPX	LDHA	AMBP
SRGAP2	NDUFS2	DNAJC13	ZC3H11A	ATG13	NDUFS7	ERLIN1	ROCK2	MPDU1	SNX2	STK10	CAPNS1	UBE4B	CP	ADH1B	FTL	ALDH1A1	ORM1
PLXNA2	ZPR1	PPP6R2	CLUH	ICOSLG	NDUFS2	SUPT3H	CLASP2	ENTPD3	DPM1	GFPT2	HSPB1	ELP1	F13A1	ADH1C	MT-ATP8	GLUD1	AHSG
IGSF3	NIPSNAP2	CNOT3	DNAJC13	HIP1R	ZPR1	GPC4	COBL	ENTPD5	USO1	TPPP	CYBB	NDUFA3	PNP	LDHA	ANG	CYB5R3	TTR
FAM20B	HMMR	ANKRD17	PPP6R2	RNF40	DUSP11	NDUFS3	CPNE3	BCAS1	MRPS14	SLIT2	RPN1	NDUFB4	HPRT1	ALDH1A1	KLKB1	GSR	ALB
DENND4B	PDCD6	SIN3B	CNOT3	PHF2	NIPSNAP2	SRSF10	DEPDC5	MACROH2A1	TOM1	ATG12	RPN2	NDUFA7	GOT2	GLUD1	C4BPA	MT-CO1	AFP
WDR1	TBCA	ATP2C2	ANKRD17	ZC3H11A	HMMR	CLN5	ATG13	SH3BGRL	PFKFB2	KBTBD11	GNAI2	VAMP5	PGK1	DHFR	VTN	MT-CO2	GC
ATP9A	ATP6V1G1	DNAJB6	SIN3B	CLUH	PDCD6	HSBP1	ICOSLG	FLNB	CCDC22	LTN1	ATP1A1	RTN3	AK1	CYB5R3	CAT	MT-CO3	PPBP
N4BP1	VPS4B	XYLB	ATP2C2	CAND2	TBCA	ECI2	HIP1R	NCOR1	PQBP1	TOMM70	ATP1B1	LETM1	F2	GSR	FUCA1	SOD1	TFRC
ROCK2	ENTPD6	COQ9	DNAJB6	DNAJC13	ATP6V1G1	EED	RNF40	NDUFS6	TIMM17B	IPO13	ARG1	EPN2	C1R	MT-CO1	ALDOA	CP	TF
CLASP2	ENTPD5	GGCT	XYLB	PPP6R2	VPS4B	BANF1	PHF2	PEX14	PRAF2	DDHD2	APOD	STBD1	HP	MT-CO2	CSTB	F13A1	LTF
PTCD1	ZNF217	NDUFS7	TMEM127	CNOT3	MPDU1	SF3B1	ZC3H11A	CS	DKC1	MYO1D	ALDH2	ZRANB2	HPR	SOD1	ANXA1	PNP	HPX
CPNE3	MACROH2A1	NDUFS2	COQ9	ANKRD17	ENTPD6	CSDE1	CLUH	SPAG7	EIF5B	TOX4	ITGB3	SNX4	F9	CP	APOB	HPRT1	FTL
DEPDC5	SH3BGRL	ZPR1	GGCT	SIN3B	ENTPD5	WBP4	DNAJC13	SEC22B	TRIM13	MICAL2	ITGB2	LUC7L3	F10	F13A1	SOD2	GOT2	FTH1
ATG13	FLNB	DUSP11	NDUFS7	DNAJB6	BCAS1	PRKRA	PHACTR2	DEAF1	EDF1	UFL1	S100A8	APOL3	PLG	PNP	OAT	EGFR	MT-ND5
ICOSLG	NCOR1	NIPSNAP2	NDUFS2	COQ9	PTP4A3	LRP6	PPP6R2	PRPF40A	KIN	SORBS2	SERPINA5	SBF1	PLAU	HPRT1	HRG	PGK1	KLKB1
PPFIA3	NDUFS6	HMMR	ZPR1	GGCT	MACROH2A1	RPS6KA5	CNOT3	TACC1	DIAPH2	UBXN7	SERPING1	ATE1	CFB	GOT2	A1BG	AK1	C4BPA
HIP1R	PEX14	PDCD6	NIPSNAP2	NDUFS7	SH3BGRL	MED6	ANKRD17	LRCH4	DNAJA2	SUN1	CFI	RASGRP1	ADA	PGK1	CD74	F2	VTN
RNF40	TULP3	TBCA	LRRN2	NDUFS2	FLNB	MYCBP2	SIN3B	MTX2	BRD4	PLPBP	MPO	VAPB	CA1	AK1	KRT1	C1R	CAT
PHF2	CS	ATP6V1G1	PDCD6	ZPR1	NCOR1	GCAT	ATP2C2	VPS26A	CUTA	ERLIN2	PCCA	SNAPIN	CA2	F2	VWF	HP	GBA1
ZC3H11A	SPAG7	VPS4B	TBCA	DUSP11	VAMP4	NPM3	DNAJB6	NDUFB1	SMPD2	PRPF6	PCCB	MPZL1	ASS1	C1R	SHBG	HPR	FUCA1
CLUH	SEC22B	ENTPD6	ATP6V1G1	NIPSNAP2	NDUFS6	LYPLA1	LRP5	PMPCB	PFDN1	PCF11	ALPL	NDUFC2	OAS1	HP	GAPDH	F9	ALDOA
CAND2	PRPF40A	ENTPD3	VPS4B	LRRN2	PEX14	ERAL1	COQ9	MED24	PPP1R11	FRYL	EIF2S1	NDUFA10	SERPINC1	HPR	ASL	F10	CSTB
DNAJC13	TACC1	ZNF217	MPDU1	PDCD6	SLC43A1	SNRNP200	GGCT	KATNA1	RNASEH1	ENDOD1	ICAM1	FKBP9	SERPINA1	F9	HLA-A	PLG	ANXA1
PPP6R2	NME6	MACROH2A1	ENTPD6	TBCA	CS	TIPRL	NDUFS7	PSIP1	NBN	GLCE	RPLP1	PGLS	SERPINA3	F10	HLA-DPB1	CFB	APOB
CNOT3	LRCH4	SH3BGRL	ENTPD5	ATP6V1G1	SPAG7	TOM1L1	RTN2	ERLIN1	NOL3	GLS	RPLP2	PAPSS2	AGT	PLG	CAPNS1	ADA	SOD2
ANKRD17	MTX2	FLNB	PTP4A3	VPS4B	SEC22B	RPS6KA4	NDUFS2	SUPT3H	DTNB	FBXO21	RPLP0	ATG7	A2M	PLAU	HSPB1	CA1	LCAT
SIN3B	VPS26A	NCOR1	MACROH2A1	MPDU1	PRPF40A	SURF6	ZPR1	GPC4	RNGTT	SLCO2B1	FABP3	TRIM16	C3	CFB	CYBB	CA2	OAT
DNAJB6	NDUFB1	NDUFS6	SH3BGRL	ENTPD6	TACC1	PPM1B	NIPSNAP2	NDUFS3	ABCB7	USP19	CLEC3B	LYPLA2	C5	ADA	RPN1	ASS1	HRG
COQ9	PMPCB	PEX14	FLNB	ENTPD3	NME6	UTP20	PDCD6	SRSF10	PLCH2	AP2A2	SSB	IPO7	TIMP1	CA1	RPN2	SERPINC1	A1BG
GGCT	SAP30	CS	NCOR1	ENTPD5	CDC45	NUP155	TBCA	CLN5	PLXNA2	SEC31A	SERPINA7	ARIH2	CST3	CA2	GNAI2	SERPINA1	CD74
NDUFS7	MED24	SPAG7	VAMP4	MACROH2A1	LRCH4	RP2	ATP6V1G1	HSBP1	IGSF3	CLSTN1	SERPIND1	TNFAIP8	CSTA	ASS1	SLC4A2	SERPINA3	KRT1
NDUFS2	KATNA1	SEC22B	NDUFS6	SH3BGRL	MTX2	STK16	VPS4B	ECI2	FAM20B	HEXIM1	ITGB1	MAP3K6	KNG1	SERPINC1	ATP1A1	AGT	VWF
ZPR1	ERN1	DEAF1	PEX14	FLNB	VPS26A	WDHD1	MPDU1	EED	EFCAB14	YIF1A	PRKCB	PGM3	HRAS	SERPINA1	ATP1B1	A2M	SHBG
DUSP11	E2F6	PRPF40A	TRIM3	NCOR1	NDUFB1	CRTAP	ENTPD3	BANF1	WDR1	UBR5	KRT18	MOCS3	KRAS	SERPINA3	ALDH2	C3	GAPDH
NIPSNAP2	PSIP1	TACC1	SLC43A1	VAMP4	PMPCB	SLC25A12	ENTPD5	SF3B1	ATP9A	AGFG2	KRT8	CD2BP2	JCHAIN	AGT	ITGB3	C5	ASL
PDCD6	ERLIN1	NME6	CS	NDUFS6	MED24	ATP6AP2	ZNF217	CSDE1	N4BP1	SCAF4	UROD	SVIL	IGKV1-5	A2M	ITGB2	TIMP1	HLA-A
TBCA	SUPT3H	CDC45	SPAG7	PEX14	KATNA1	RNASEH2A	MACROH2A1	WBP4	ROCK2	NDUFB6	IGKV4-1	AHSA1	IGKV3-20	C3	S100A8	CST3	HLA-DPB1
ATP6V1G1	GPC4	LRCH4	SEC22B	SLC43A1	ERN1	CDC123	SH3BGRL	PRKRA	CLASP2	UBE4B	GSN	SLC34A2	IGLV1-47	C5	SLC25A5	KNG1	CAPNS1
VPS4B	NDUFS3	MTX2	PRPF40A	CS	E2F6	RPP40	FLNB	LRP6	COBL	ELP1	ATP5F1B	APOM	IGLV1-40	TIMP1	SERPING1	HRAS	HSPB1
MPDU1	SRSF10	VPS26A	TACC1	SPAG7	PSIP1	EIF3G	NCOR1	RPS6KA5	CPNE3	UBL3	C2	PSMG1	IGLV2-14	CST3	CFI	KRAS	CYBB
ENTPD6	HSBP1	NDUFB1	NME6	SEC22B	ERLIN1	EIF3J	VAMP4	MED6	DEPDC5	NDUFA3	S100A9	FMNL1	IGLV2-8	KNG1	MPO	TGFB1	RPN1
ENTPD3	ECI2	PMPCB	LRCH4	PRPF40A	NDUFS3	CBR3	NDUFS6	MYCBP2	ATG13	NDUFB8	APOA4	SGPL1	IGLV3-19	NRAS	PCCA	JCHAIN	RPN2
ENTPD5	KHDRBS3	SAP30	MTX2	TACC1	SRSF10	PSMD10	PEX14	NPM3	ICOSLG	NDUFA7	EIF4E	CTDNEP1	IGLV6-57	TGFB1	PCCB	IGKV1-5	GNAI2
ZNF217	TAF5L	MED24	VPS26A	NME6	GMNN	AP1G2	TRIM3	LYPLA1	HIP1R	VAMP5	CKM	ABCA1	CD4	GNRH1	EIF2S1	IGLV1-47	ATP1A1
MACROH2A1	EED	KATNA1	NDUFB1	GIGYF1	CLN5	ZMPSTE24	CS	ERAL1	OBSL1	RTN3	ENO1	NSA2	CD8A	JCHAIN	ICAM1	IGLV1-40	ATP1B1
SH3BGRL	BANF1	ERN1	PMPCB	LRCH4	HSBP1	TRAPPC6A	SPAG7	CREG1	RNF40	LETM1	PYGL	H6PD	IGHV1-69	IGKV1-5	RPLP1	IGLV2-8	ARG1
FLNB	SF3B1	PSIP1	SAP30	MTX2	ECI2	IDH1	SEC22B	SERPINB7	PHF2	EPN2	GPI	SEC24A	IGHV1-46	IGLV1-47	RPLP2	IGLV6-57	ALDH2
NCOR1	CSDE1	ERLIN1	MED24	VPS26A	KHDRBS3	GATB	PRPF40A	SNRNP200	ZC3H11A	STBD1	NPM1	SEC24B	IGHV3-33	IGLV2-11	RPLP0	CD4	ITGB3
NDUFS6	WBP4	SUPT3H	KATNA1	NDUFB1	TAF5L	SCO1	TACC1	TIPRL	CLUH	ZRANB2	TPM3	VNN2	IGHV3-7	IGLV3-19	FABP3	IGHV1-69	ITGB2
PEX14	PRKRA	GPC4	RDH16	PMPCB	EED	CYP7B1	GIGYF1	TOM1L1	KDM4A	SNX4	ITGAV	NADK	PIGR	IGLV6-57	CLEC3B	IGHV1-46	S100A8
TRIM3	MTRF1	NDUFS3	ERN1	MED24	BANF1	ATRN	LRCH4	RPS6KA4	DNAJC13	LUC7L3	HEXA	TDP2	IGKC	IGHV1-46	SSB	IGHV3-7	SLC25A5
SLC43A1	LRP6	SRSF10	E2F6	KATNA1	SF3B1	RBBP9	MTX2	PPM1B	PHACTR2	APOL3	KLK1	MPC2	IGHG1	IGHV3-7	SERPIND1	PIGR	SERPING1
CS	RPS6KA5	GMNN	PSIP1	ERN1	CSDE1	STAM2	VPS26A	UTP20	PPP6R2	SBF1	EPHX1	ETHE1	IGHG2	IGHV2-5	ITGB1	IGKC	CFI
SPAG7	MED6	HSBP1	ERLIN1	E2F6	WBP4	TUSC2	NDUFB1	NUP155	CNOT3	GOSR1	DBI	ACSL3	IGHG3	PIGR	PRKCB	IGHG1	MPO
SEC22B	MYCBP2	ECI2	SUPT3H	CRLF1	PRKRA	CCNK	PMPCB	RP2	ANKRD17	ATE1	LDHB	POLR1A	IGHG4	IGKC	KRT18	IGHG2	PCCA
PRPF40A	GCAT	TADA3	GPC4	PSIP1	MTRF1	DHRS3	SAP30	WDHD1	SIN3B	VAPB	GPX1	STAMBP	IGHM	IGHG1	KRT8	IGHG3	PCCB
TACC1	NPM3	TAF5L	NDUFS3	ERLIN1	CRCP	ARL6IP5	MED24	CRTAP	ATP2C2	SNAPIN	PGK2	ASMTL	IGHA1	IGHG2	UROD	IGHG4	ALPL
NME6	LYPLA1	EED	SRSF10	SUPT3H	LRP6	PIAS1	KATNA1	SLC25A12	DNAJB6	MPZL1	PROS1	CDS2	IGHA2	IGHG3	INSR	IGHM	EIF2S1
GIGYF1	ERAL1	BANF1	CLN5	GPC4	MED6	BCAS2	ERN1	ATP6AP2	XYLB	NDUFC2	P4HB	RAB3D	HLA-B	IGHG4	GSN	IGHA1	ICAM1
MTX2	CREG1	SF3B1	HSBP1	NDUFS3	MYCBP2	DCTN3	PSIP1	RNASEH2A	COQ9	NDUFA10	H1-0	SNAP29	HLA-DRA	IGHM	ATP5F1B	IGHA2	RPLP1
VPS26A	SNRNP200	CSDE1	ECI2	SRSF10	GCAT	DNAJC8	ERLIN1	CDC123	GGCT	FKBP9	ACYP1	OXSR1	HLA-DQA1	IGHA1	S100A9	HLA-B	RPLP2
NDUFB1	TRMU	WBP4	KHDRBS3	GMNN	NPM3	SMNDC1	GPC4	ZMYND10	NDUFS7	CELF2	CSF1R	GGPS1	HLA-DRB1	IGHA2	APOA4	HLA-DRA	RPLP0
PMPCB	TIPRL	PRKRA	TAF5L	CLN5	LYPLA1	RAD17	NDUFS3	RPP40	NDUFS2	PGLS	CTSD	HSPA4L	HLA-DQB1	HLA-B	EIF4E	HLA-DQA1	JUN
MED24	TOM1L1	CRCP	EED	HSBP1	ERAL1	ATP5PD	SRSF10	EIF3G	ZPR1	PAPSS2	ANXA2	PTBP3	HBZ	HLA-DRA	ENO1	HLA-DRB1	FABP3
KATNA1	RPS6KA4	RPS6KA5	BANF1	ECI2	DEDD	TSPAN9	CLN5	EIF3J	DUSP11	SMC2	C8A	IL33	HBD	HLA-DRB1	PYGL	HLA-DQB1	CLEC3B
ERN1	PPM1B	MED6	SF3B1	KHDRBS3	CREG1	FLOT1	HSBP1	CBR3	NIPSNAP2	ATG7	C8B	LSM8	COL1A1	HLA-DQB1	GPI	HBD	SSB
E2F6	UTP20	MYCBP2	CSDE1	TAF5L	SNRNP200	TRIO	ECI2	PSMD10	PDCD6	TRIM16	C8G	AP2A1	COL3A1	HBD	NPM1	COL1A1	SERPINA7
CRLF1	NUP155	GCAT	WBP4	EED	TRMU	ATP5MG	KHDRBS3	AP1G2	TBCA	LYPLA2	CAPN1	RIGI	KRT6A	COL1A1	TPM3	COL3A1	SERPIND1
PSIP1	RP2	NPM3	PRKRA	BANF1	TIPRL	MPDZ	EED	ZMPSTE24	ATP6V1G1	IPO7	TUBB	STAU1	LMNA	COL3A1	ITGAV	CRYAB	ITGB1
ERLIN1	STK16	LYPLA1	MED6	SF3B1	TOM1L1	CPD	BANF1	PPP1R37	VPS4B	ARIH2	CA3	CAVIN2	SPTA1	COL4A1	HEXA	LMNA	PRKCB
SUPT3H	WDHD1	ERAL1	MYCBP2	CSDE1	RPS6KA4	GLRX3	SF3B1	TRAPPC6A	MPDU1	TNFAIP8	IVL	BAG2	APOA1	LMNA	EPHX1	SPTA1	KRT18
NDUFS3	CRTAP	CREG1	GCAT	WBP4	PPM1B	RSL1D1	CSDE1	IDH1	ENTPD6	MAP3K6	DCN	BAG3	APOE	SPTA1	DBI	APOA1	KRT8
SRSF10	SLC25A12	SNRNP200	NPM3	SKAP2	ADAP1	WFS1	WBP4	GATB	ENTPD3	PGM3	PSAP	MAP4K4	APOA2	APOA1	LDHB	APOE	MYL1
GMNN	B3GALNT1	TRMU	LYPLA1	PRKRA	UTP20	CLPX	PRKRA	SCO1	ENTPD5	MOCS3	HEXB	MLYCD	APOC1	APOE	GPX1	APOA2	UROD
CLN5	ATP6AP2	TIPRL	ERAL1	LRP6	NUP155	NEBL	LRP6	CYP7B1	ZNF217	CD2BP2	CTSL	CRYZL1	APOC2	APOA2	THBD	APOC1	BCHE
HSBP1	RNASEH2A	TOM1L1	CREG1	RPS6KA5	RP2	SEC14L2	RPS6KA5	ATRN	BCAS1	TNFRSF6B	PFN1	AIFM1	APOC3	APOC1	PGK2	APOC2	GLA
ECI2	CDC123	RPS6KA4	SERPINB7	MED6	STK16	TM7SF2	MED6	RBBP9	MACROH2A1	SVIL	BPGM	EML2	FGA	APOC2	PROS1	APOC3	IGKV4-1
KHDRBS3	BCAR3	SURF6	SNRNP200	MYCBP2	WDHD1	SNCG	MYCBP2	STAM2	SH3BGRL	PIGN	APRT	NUDT14	FGB	APOC3	P4HB	FGA	GSN
TAF5L	RPP40	PPM1B	TRMU	NPM3	CRTAP	CIAO1	SPAG6	TUSC2	FLNB	BAG4	EPRS1	TSPAN15	FGG	FGA	H1-0	FGB	ATP5F1B
EED	EIF3G	UTP20	TIPRL	LYPLA1	SLC25A12	PDE5A	NPM3	DGAT1	NCOR1	AHSA1	HSP90AA1	BPNT1	SLC4A1	FGB	ACYP1	FGG	C2
BANF1	EIF3J	NUP155	TOM1L1	ERAL1	PALM	SRP72	LYPLA1	CCNK	VAMP4	SLC34A2	GALT	DDAH2	CRP	FGG	CTSD	SLC4A1	S100A9
SF3B1	CBR3	RP2	RPS6KA4	SNRNP200	ATP6AP2	DXO	ERAL1	DHRS3	NDUFS6	APOM	HNRNPC	ABHD16A	APCS	SLC4A1	ANXA2	CRP	APOA4
CSDE1	PSMD10	STK16	SURF6	TRMU	RNASEH2A	DDAH1	CREG1	ARL6IP5	PEX14	PSMG1	LAMB1	TXNDC12	C1QA	CRP	C8B	APCS	EIF4E
WBP4	ZMPSTE24	WDHD1	PPM1B	TIPRL	CDC123	URI1	SERPINB7	DYSF	TRIM3	FMNL1	YES1	EFEMP2	C1QB	APCS	GP1BA	C1QB	CKM
STX11	TRAPPC6A	CRTAP	UTP20	TOM1L1	CAPN15	B3GAT3	SNRNP200	PIAS1	TULP3	SGPL1	LYN	AGR2	C1QC	C1QA	C8G	C1QC	ENO1
PRKRA	IDH1	SLC25A12	NUP155	RPS6KA4	POP7	MTA2	TIPRL	BCAS2	CS	CTDNEP1	TPM2	BCL10	C9	C1QB	CAPN1	C9	PYGL
LRP6	GATB	B3GALNT1	RP2	SURF6	RPP40	TPPP	OFD1	DCTN3	SPAG7	NSA2	FH	NDUFB10	LRG1	C1QC	TUBB	LRG1	GPI
RPS6KA5	SCO1	ATP6AP2	STK16	PPM1B	EIF3G	ATG12	TOM1L1	DNAJC8	SEC22B	H6PD	SFTPB	CLPTM1	FN1	C9	CA3	FN1	NPM1
MED6	ATRN	RNASEH2A	WDHD1	UTP20	EIF3J	LTN1	RPS6KA4	SMNDC1	PRPF40A	SEC24A	THBS1	MOCS2	RBP4	APOH	DCN	RBP4	TPM3
MYCBP2	RBBP9	CDC123	CRTAP	NUP155	CBR3	TOMM70	PPM1B	RAD17	TACC1	SEC24B	COL1A2	TOMM40	AMBP	LRG1	PSAP	AMBP	ITGAV
NPM3	STAM2	RPP40	SLC25A12	RP2	PSMD10	IPO13	UTP20	ATP5PD	NME6	VNN1	ANXA6	NAPSA	ORM1	FN1	HEXB	ORM1	HEXA
LYPLA1	ALDH1L1	EIF3G	RAD51D	GPX5	AP1G2	DDHD2	NUP155	TSPAN9	LRCH4	VNN2	CD55	PEX11B	AHSG	RBP4	PFN1	AHSG	EPHX1
ERAL1	DGAT1	EIF3J	ATP6AP2	STK16	ZMPSTE24	MYO1D	RP2	FLOT1	MTX2	NADK	SERPINA6	PAK4	TTR	AMBP	BPGM	TTR	DBI
CREG1	CCNK	CBR3	RNASEH2A	WDHD1	SC5D	TOX4	STK16	TRIO	VPS26A	SFT2D2	SLC3A2	ACTL6A	ALB	ORM1	APRT	ALB	LDHB
SNRNP200	DHRS3	PSMD10	CDC123	CRTAP	TRAPPC6A	SEC24D	WDHD1	ATP5MG	NDUFB1	ETHE1	PFKM	MT-CYB	GC	AHSG	EPRS1	AFP	GPX1
TRMU	ARL6IP5	AP1G2	BCAR3	SLC25A12	IDH1	UFL1	CRTAP	MPDZ	PMPCB	ACSL3	HSP90AB1	CYB5A	PPBP	TTR	HSP90AA1	GC	THBD
TIPRL	PIAS1	ZMPSTE24	POP7	B3GALNT1	GATB	SORBS2	SLC25A12	CPD	SAP30	POLR1A	SRPRA	ADH1B	TFRC	ALB	GALT	PPBP	PGK2
OFD1	BCAS2	IDH1	RPP40	ATP6AP2	ATRN	PHF14	ATP6AP2	GLRX3	MED24	STAMBP	ELANE	LDHA	TF	AFP	HNRNPC	TFRC	PROS1
TOM1L1	DCTN3	GATB	EIF3G	RNASEH2A	RBBP9	TMEM63A	RNASEH2A	RSL1D1	KATNA1	ASMTL	MMP2	ALDH1A1	LTF	GC	LAMB1	TF	P4HB
RPS6KA4	DNAJC8	SCO1	EIF3J	CDC123	STAM2	FARP2	CDC123	WFS1	ERN1	CDS2	SOD3	GLUD1	HPX	TFRC	YES1	LTF	H1-0
SURF6	SMNDC1	ATRN	CBR3	BCAR3	ALDH1L1	UBXN7	ZMYND10	CLPX	PSIP1	RAB3D	CTSG	DHFR	FTL	TF	TPM2	HPX	ACYP1
PPM1B	ATP5PD	RBBP9	PSMD10	POP7	TUSC2	SUN1	POP7	NEBL	ERLIN1	SNAP29	HMBS	CYB5R3	FTH1	LTF	FH	FTH1	FES
UTP20	TSPAN9	STAM2	AP1G2	RPP40	DGAT1	PLPBP	RPP40	SEC14L2	SUPT3H	OXSR1	MME	GSR	MT-ND2	HPX	SFTPB	MT-ND2	CSF1R
NUP155	FLOT1	ALDH1L1	ZMPSTE24	EIF3G	CCNK	ERLIN2	EIF3G	TM7SF2	GPC4	GGPS1	ITGA2B	MT-CO1	MT-ND4	FTL	THBS1	MT-ND5	CTSD
RP2	TRIO	TUSC2	TRAPPC6A	EIF3J	DHRS3	PRPF6	EIF3J	SNCG	NDUFS3	HSPA4L	PDHA1	MT-CO2	MT-ND5	FTH1	COL1A2	MT-ND6	ANXA2
GPX5	ATP5MG	DGAT1	IDH1	CBR3	ARL6IP5	PCF11	CBR3	CIAO1	SRSF10	PTBP3	CD14	MT-CO3	MT-ND6	MT-ND2	ANXA6	ANG	C8A
STK16	MPDZ	CCNK	GATB	PSMD10	PIAS1	FRYL	PSMD10	DFFB	CLN5	IL33	COL4A2	SOD1	ANG	MT-ND4	CD55	KLKB1	C8B
WDHD1	CPD	DHRS3	SCO1	AP1G2	BCAS2	NFAT5	AP1G2	SRP72	HSBP1	LSM8	PTPRC	CP	KLKB1	MT-ND5	SERPINA6	C4BPA	GP1BA
CRTAP	GLRX3	ARL6IP5	ATRN	ZMPSTE24	DCTN3	ENDOD1	ZMPSTE24	DDAH1	ECI2	AP2A1	CFH	F13A1	C4BPA	ANG	SLC3A2	VTN	C8G
SLC25A12	RSL1D1	PIAS1	RBBP9	IDH1	DNAJC8	GLCE	TRAPPC6A	URI1	TADA3	RIGI	SNRNP70	PNP	VTN	KLKB1	PFKM	CAT	CAPN1
B3GALNT1	WFS1	BCAS2	STAM2	SCO1	SMNDC1	GLS	IDH1	B3GAT3	TAF5L	STAU1	HCK	HPRT1	CAT	MMP1	HSP90AB1	GBA1	TUBB
RAD51D	CLPX	DCTN3	TUSC2	RBBP9	RAD17	HAUS5	GATB	MTA2	EED	CAVIN2	ITGA5	GOT2	GBA1	C4BPA	ELANE	FUCA1	CA3
PALM	SEC14L2	DNAJC8	DGAT1	ALDH1L1	ATP5PD	FBXO21	SCO1	STK10	BANF1	BAG2	VIM	EGFR	FUCA1	VTN	MMP2	ALDOA	DCN
ATP6AP2	STC2	SMNDC1	CCNK	TUSC2	TSPAN9	KDM4B	CYP7B1	TPPP	SF3B1	BAG3	SERPINF2	PGK1	ALDOA	CAT	SOD3	CSTB	PSAP
RNASEH2A	TM7SF2	RAD17	DHRS3	DGAT1	FLOT1	USP19	ATRN	SLIT2	CSDE1	MAP4K4	RPS17	AK1	CSTB	GBA1	CTSG	ANXA1	HEXB
CDC123	SNCG	ATP5PD	ARL6IP5	CCNK	TRIO	WDR47	RBBP9	ATG12	WBP4	MLYCD	KRT19	F2	ANXA1	FUCA1	HMBS	APOB	CTSL
BCAR3	CIAO1	TSPAN9	DYSF	DHRS3	ATP5MG	AP2A2	STAM2	LTN1	PRKRA	CRYZL1	KRT7	C1R	APOB	ALDOA	MME	NR3C1	PFN1
POP7	DFFB	FLOT1	PIAS1	ARL6IP5	CPD	SEC31A	TUSC2	TOMM70	MTRF1	AIFM1	GNAI3	HP	SOD2	CSTB	ITGA2B	SOD2	BPGM
RPP40	SRP72	TRIO	BCAS2	DYSF	GLRX3	CLSTN1	DGAT1	IPO13	CRCP	EML2	ANXA5	HPR	LCAT	ANXA1	PDHA1	LCAT	APRT
EIF3G	DXO	ATP5MG	DCTN3	PIAS1	RSL1D1	HEXIM1	CCNK	DDHD2	LRP6	TSPAN15	SNRPA	F9	OAT	APOB	CD14	OAT	EPRS1
EIF3J	DDAH1	MPDZ	DNAJC8	BCAS2	WFS1	TJP3	DHRS3	MYO1D	RPS6KA5	BPNT1	ENO2	PLG	HRG	SOD2	COL4A2	HRG	CTSB
CBR3	RECQL4	CPD	SMNDC1	DCTN3	CLPX	YIF1A	ARL6IP5	TOX4	MED6	FADS2	HBQ1	CFB	THY1	LCAT	PTPRC	THY1	HSP90AA1
PSMD10	URI1	GLRX3	ATP5PD	DNAJC8	SEC14L2	UBR5	PIAS1	MICAL2	MYCBP2	DDAH2	ACAA1	ADA	A1BG	OAT	CFH	A1BG	GALT
AP1G2	B3GAT3	RSL1D1	TSPAN9	SMNDC1	STC2	SCAF4	BCAS2	SEC24D	SPAG6	ABHD16A	DBH	CA1	CD74	TK1	SNRNP70	CD74	HNRNPC
ZMPSTE24	MTA2	WFS1	FLOT1	ATP5PD	CIAO1	NDUFB6	DCTN3	UFL1	NPM3	TXNDC12	GSTP1	CA2	KRT1	HRG	ITGA5	KRT1	LAMB1
IDH1	STK10	CLPX	TRIO	DNAJB5	DFFB	MFN2	DNAJC8	SORBS2	LYPLA1	ECD	LGALS1	ASS1	S100B	THY1	NFIC	S100B	YES1
GATB	PRKD3	NEBL	ATP5MG	TSPAN9	SRP72	UBE4B	SMNDC1	PHF14	ERAL1	MBD3	QDPR	SERPINC1	VWF	A1BG	VIM	VWF	LYN
SCO1	GFPT2	SEC14L2	CPD	FLOT1	DDAH1	ELP1	RAD17	TMEM63A	CREG1	NUDT3	HMGB1	SERPINA1	SHBG	CD74	SERPINF2	SHBG	TPM2
CYP7B1	ATG12	TM7SF2	GLRX3	TRIO	RECQL4	NDUFA3	ATP5PD	FARP2	SNRNP200	AGR2	RBP1	SERPINA3	GAPDH	KRT1	RPS17	GAPDH	FH
ATRN	LTN1	CIAO1	RSL1D1	ATP5MG	RECQL5	NDUFB4	TSPAN9	UBXN7	TRMU	BCL10	FBP1	AGT	ASL	VWF	KRT19	ASL	SFTPB
RBBP9	TOMM70	SRP72	WFS1	MPDZ	URI1	NDUFB8	FLOT1	SUN1	TIPRL	NDUFB10	TPM1	A2M	HLA-A	SHBG	KRT7	HLA-A	THBS1
STAM2	IPO13	DDAH1	CLPX	CPD	MTA2	SCEL	TRIO	PLPBP	OFD1	CLPTM1	CLTA	C3	HLA-DPB1	GAPDH	GNAI3	HLA-DPB1	SP1
ALDH1L1	DDHD2	RECQL4	NEBL	GLRX3	GFPT2	NDUFA7	ATP5MG	ERLIN2	TOM1L1	MOCS2	CLTB	C5	CAPNS1	ASL	ANXA5	CAPNS1	COL1A2
DGAT1	MYO1D	RECQL5	SEC14L2	KRT36	TPPP	RTN3	MPDZ	PRPF6	RPS6KA4	TOMM40	ANXA4	CST3	HSPB1	HLA-A	CD63	HSPB1	ANXA6
CCNK	TOX4	URI1	STC2	RSL1D1	ATG12	LETM1	CPD	PCF11	PPM1B	NAPSA	CNP	CSTA	CYBB	CAPNS1	SNRPA	CYBB	CD55
DHRS3	UFL1	B3GAT3	TM7SF2	WFS1	KBTBD11	EPN2	GLRX3	FRYL	ADAP1	PEX11B	HMOX1	KNG1	RPN1	HSPB1	ENO2	RPN1	SERPINA6
ARL6IP5	PHF14	MTA2	SNCG	CLPX	LTN1	STBD1	RSL1D1	NFAT5	UTP20	ACTL6A	PDGFRB	KRAS	RPN2	CYBB	HBQ1	RPN2	SLC3A2
DYSF	TMEM63A	STK10	CIAO1	SEC14L2	TOMM70	ZRANB2	WFS1	ENDOD1	NUP155	MT-CYB	DLD	TGFB1	GNAI2	RPN1	ACAA1	GNAI2	PFKM
PIAS1	UBXN7	GFPT2	DFFB	TM7SF2	IPO13	SNX4	CLPX	GLCE	RP2	CYB5A	SNRPA1	GNRH1	ATP1A1	RPN2	GSTP1	SLC4A2	HSP90AB1
BCAS2	SUN1	TPPP	SLC22A5	CIAO1	DDHD2	LUC7L3	NEBL	GLS	STK16	ADH1B	CTSH	JCHAIN	ATP1B1	GNAI2	LGALS1	ATP1A1	ELANE
DCTN3	PLPBP	ATG12	PDE9A	DFFB	MYO1D	MBD4	SEC14L2	FBXO21	WDHD1	LDHA	TACSTD2	IGKV1-5	ARG1	ATP1A1	QDPR	ATP1B1	MMP2
DNAJC8	ERLIN2	LTN1	SRP72	SRP72	TOX4	SBF1	TM7SF2	KDM4B	CRTAP	ALDH1A1	FGR	IGLV1-47	ALDH2	ATP1B1	HMGB1	APP	SOD3
SMNDC1	PRPF6	TOMM70	DDAH1	DXO	SUPT7L	GOSR1	SNCG	USP19	SLC25A12	GLUD1	C1S	IGLV3-19	ITGB3	ALDOB	RBP1	ARG1	CTSG
RAD17	PCF11	IPO13	RECQL4	DDAH1	UFL1	KAT7	CIAO1	WDR47	ATP6AP2	CYB5R3	PARP1	CD8A	ITGB2	ARG1	FBP1	ALDH2	HMBS
ATP5PD	FRYL	DDHD2	RECQL5	RECQL4	TMCC1	ATE1	PDE5A	AP2A2	RNASEH2A	GSR	IFIT2	IGHV3-7	S100A8	APOD	SPARC	ITGB3	MME
DNAJB5	NFAT5	MYO1D	URI1	URI1	PHF14	VAPB	DFFB	SEC31A	CDC123	MT-CO1	ALOX5	IGHV2-5	SLC25A5	ALDH2	TPM1	ITGB2	MGP
TSPAN9	ENDOD1	TOX4	B3GAT3	B3GAT3	TMEM63A	SNAPIN	SRP72	CLSTN1	ZMYND10	MT-CO2	UCHL1	PIGR	SERPING1	ITGB3	CLTA	S100A8	ITGA2B
FLOT1	GLCE	SUPT7L	MTA2	MTA2	FARP2	MPZL1	DXO	HEXIM1	BCAR3	MT-CO3	LTA4H	IGKC	CFI	ITGB2	CLTB	SLC25A5	LPA
TRIO	GLS	UFL1	GFPT2	STK10	UBXN7	NDUFC2	DDAH1	TJP3	RPP40	SOD1	ALDOC	IGHG1	MPO	S100A8	ANXA4	SERPING1	PDHA1
ATP5MG	HAUS5	TMCC1	TPPP	PRKD3	SUN1	NDUFA10	RECQL5	YIF1A	EIF3G	CP	C4A	IGHG2	PCCA	SERPINE1	CNP	CFI	CD14
MPDZ	FBXO21	PHF14	ATG12	GFPT2	PLPBP	FKBP9	URI1	UBR5	EIF3J	F13A1	C4B_2	IGHG3	PCCB	SLC25A5	HMOX1	MPO	COL4A2
CPD	KDM4B	TMEM63A	LTN1	TPPP	ERLIN2	CELF2	B3GAT3	AGFG2	CBR3	PNP	DERPC	IGHG4	ALPL	SERPINA5	PDGFRB	PCCA	PTPRC
GLRX3	SOGA1	FARP2	TOMM70	ATG12	PRPF6	PGLS	MTA2	PRSS23	PSMD10	HPRT1	SAA1	IGHM	EIF2S1	SERPING1	DLD	PCCB	CFH
KRT36	USP19	UBXN7	IPO13	KBTBD11	PCF11	PAPSS2	STK10	SCAF4	AP1G2	GOT2	RO60	IGHA1	ICAM1	CFI	SNRPA1	ALPL	SNRNP70
RSL1D1	WDR47	SUN1	DDHD2	LTN1	FRYL	SMC2	TPPP	NDUFB6	ZMPSTE24	ABL1	GAA	IGHA2	RPLP1	ISG15	CTSH	EIF2S1	HCK
WFS1	AP2A2	PLPBP	MYO1D	TOMM70	NFAT5	ATG7	ATG12	MFN2	PPP1R37	EGFR	RRAS	IGHD	RPLP2	MPO	TACSTD2	ICAM1	ITGA5
CLPX	SEC31A	ERLIN2	TOX4	PLEKHG5	ENDOD1	TACC2	KBTBD11	DUSP14	TRAPPC6A	PGK1	HLA-C	HLA-B	RPLP0	PCCA	C1S	RPLP1	NFIC
SEC14L2	CLSTN1	PRPF6	MICAL2	IPO13	GLCE	TRIM16	LTN1	UBE4B	IDH1	AK1	H1-4	HLA-DRA	JUN	PCCB	PARP1	RPLP2	VIM
TM7SF2	HEXIM1	PCF11	SEC24D	DDHD2	GLS	FARS2	TOMM70	ELP1	GATB	F2	DLAT	HLA-DQA1	FABP3	ALPL	IFIT2	RPLP0	SERPINF2
CIAO1	YIF1A	FRYL	SUPT7L	MYO1D	HAUS5	LYPLA2	IPO13	NDUFA3	SCO1	C1R	TXN	HLA-DRB1	CLEC3B	EIF2S1	IFIT1	JUN	RPS17
DFFB	UBR5	NFAT5	UFL1	TOX4	FBXO21	IPO7	DDHD2	NDUFB4	CYP7B1	HP	COX5B	HLA-DQB1	SSB	ICAM1	ALOX5	FABP3	KRT19
SRP72	PRSS23	ENDOD1	TMCC1	MICAL2	KDM4B	ARIH2	MYO1D	NDUFB8	ATRN	HPR	C7	HBD	SERPINA7	RPLP1	UCHL1	CLEC3B	KRT7
DXO	SCAF4	GLCE	PHF14	SUPT7L	USP19	TNFAIP8	TOX4	SCEL	RBBP9	F9	PRKAR1A	COL1A1	SERPIND1	RPLP2	LTA4H	SSB	GNAI3
DDAH1	NDUFB6	GLS	TMEM63A	UFL1	AP2A2	MAP3K6	SEC24D	NDUFA7	STAM2	F10	KIT	COL3A1	ITGB1	RPLP0	ALDOC	SERPIND1	ANXA5
RECQL4	MFN2	HAUS5	FARP2	PHF14	SEC31A	PGM3	SUPT7L	RTN3	ALDH1L1	PLG	ESD	KRT14	PRKCB	FABP3	C4A	ITGB1	CD63
RECQL5	DUSP14	FBXO21	UBXN7	TMEM63A	CLSTN1	MOCS3	UFL1	LETM1	TUSC2	PLAU	HSPD1	KRT6A	KRT18	CLEC3B	C4B_2	PRKCB	SNRPA
URI1	UBE4B	KDM4B	SUN1	FARP2	HEXIM1	CD2BP2	SORBS2	EPN2	RASSF9	CFB	CLU	LMNA	KRT8	SSB	JMJD7	KRT18	ENO2
B3GAT3	ZFPL1	SOGA1	PLPBP	UBXN7	TJP3	SVIL	PHF14	STBD1	DGAT1	ADA	HSPA5	APOA1	COL5A2	SERPINA7	MYZAP	KRT8	HBQ1
MTA2	ELP1	USP19	ERLIN2	SUN1	YIF1A	PIGN	TMEM63A	ZRANB2	CCNK	CA1	LAMC1	APOE	UROD	SERPIND1	POLR1D	MYL1	ACAA1
STK10	GABARAP	WDR47	PRPF6	PLPBP	UBR5	BAG4	FARP2	SNX4	DHRS3	CA2	HSPA8	APOA2	BCHE	ITGB1	RO60	UROD	GSTP1
PRKD3	NDUFA3	AP2A2	PCF11	ERLIN2	AGFG2	AHSA1	UBXN7	LUC7L3	ARL6IP5	ASS1	SLC2A1	APOC1	GLA	PRKCB	GAA	INSR	LGALS1
GFPT2	NDUFB4	SEC31A	FRYL	PRPF6	SCAF4	SLC34A2	SUN1	KIF4A	PIAS1	SERPINC1	SLC2A3	APOC2	IGKV4-1	KRT18	RRAS	GLA	QDPR
TPPP	NDUFB8	CLSTN1	NFAT5	PCF11	NDUFB6	PARN	PLPBP	SBF1	PIAS2	SERPINA1	EPB41	APOC3	IGHV4-34	KRT8	HLA-C	IGKV4-1	HMGB1
ATG12	NDUFB2	HEXIM1	ENDOD1	FRYL	MFN2	PSMG1	ERLIN2	GOSR1	BCAS2	SERPINA3	PDHB	FGA	GSN	CALB1	H1-4	GSN	RBP1
LTN1	NDUFA7	YIF1A	GLCE	ENDOD1	AKR7A3	SGPL1	PRPF6	KAT7	DCTN3	AGT	DBT	FGB	ATP5F1B	COL5A2	DLAT	ATP5F1B	FBP1
TOMM70	RTN3	UBR5	GLS	GLCE	UBE4B	CLDN7	PCF11	ATE1	DNAJC8	A2M	ITGAM	FGG	C2	UROD	TXN	C2	SPARC
PLEKHG5	LETM1	SCAF4	FBXO21	GLS	ELP1	NSA2	FRYL	VAPB	SMNDC1	C3	PYGB	MBP	S100A9	INSR	COX5B	S100A9	TPM1
IPO13	EPN2	NDUFB6	KDM4B	HAUS5	UBL3	H6PD	NFAT5	SNAPIN	RAD17	C5	PYGM	SLC4A1	APOA4	BCHE	MGST1	APOA4	CLTA
DDHD2	STBD1	MFN2	SOGA1	KDM4B	NDUFA3	SEC24A	ENDOD1	MPZL1	ATP5PD	TIMP1	MBL2	APCS	EIF4E	GLA	C7	EIF4E	CLTB
MYO1D	ZRANB2	DUSP14	USP19	SOGA1	NDUFB4	SEC24B	GLCE	NDUFC2	TSPAN9	CST3	RALA	C1QA	ENO1	IGKV4-1	PRKAR1A	CKM	ANXA4
TOX4	SNX4	SNUPN	WDR47	USP19	NDUFB8	ADGRL2	GLS	NDUFA10	FLOT1	CSTA	RALB	C1QB	PYGL	GSN	ESD	ENO1	HMOX1
MICAL2	LUC7L3	UBE4B	AP2A2	WDR47	SCEL	CBX6	FBXO21	FKBP9	TRIO	KNG1	SPTB	C1QC	GPI	CDK1	HSPD1	PYGL	PDGFRB
SUPT7L	KIF4A	ELP1	SEC31A	AP2A2	NDUFA7	NADK	KDM4B	CELF2	ATP5MG	HRAS	LAMP1	C9	NPM1	ATP5F1B	CLU	GPI	DLD
UFL1	MBD4	NDUFA3	CLSTN1	SEC31A	RTN3	TDP2	SOGA1	PGLS	MPDZ	KRAS	ERG	APOH	TPM3	C2	HSPA5	NPM1	SNRPA1
SORBS2	SBF1	NDUFB4	HEXIM1	CLSTN1	LETM1	MPC2	USP19	SMC2	CPD	LDLR	ACADM	LRG1	ITGAV	S100A9	LAMC1	TPM3	CTSH
TMCC1	GOSR1	NDUFB8	TJP3	HEXIM1	EPN2	ETHE1	WDR47	ATG7	GLRX3	TGFB1	G6PD	FN1	HEXA	APOA4	HSPA8	ITGAV	TACSTD2
PHF14	KAT7	SCEL	YIF1A	CCNB2	ZRANB2	ACSL3	AP2A2	TRIM16	RSL1D1	JCHAIN	DMD	RBP4	EPHX1	EIF4E	SLC2A1	HEXA	FGR
TMEM63A	ATE1	NDUFA7	UBR5	YIF1A	SNX4	POLR1A	SEC31A	FARS2	WFS1	IGLV1-47	MTHFD1	AMBP	DBI	CEACAM5	SLC2A3	EPHX1	C1S
UBXN7	VAPB	RTN3	AGFG2	UBR5	ZWINT	PCNT	CLSTN1	ZBTB7A	ANXA9	IGLV2-8	CETP	ORM1	LDHB	ENO1	EPB41	DBI	PARP1
SUN1	SNAPIN	LETM1	PRSS23	SCAF4	LUC7L3	YEATS4	HEXIM1	LYPLA2	CLPX	IGLV3-1	EPX	AHSG	GPX1	PYGL	PDHB	LDHB	IFIT1
PLPBP	MPZL1	EPN2	SCAF4	NDUFB6	KIF4A	STAMBP	TJP3	IPO7	NEBL	CD8A	SCGB1A1	TTR	PGK2	GPI	DBT	CENPB	ALOX5
ERLIN2	NDUFC2	STBD1	NDUFB6	MFN2	MBD4	ASMTL	YIF1A	ARIH2	SEC14L2	IGHV1-69	SFTPC	ALB	PROS1	NPM1	ITGAM	GPX1	UCHL1
PRPF6	NDUFA10	ZRANB2	MFN2	UBE4B	SBF1	CDS2	UBR5	TNFAIP8	TM7SF2	IGHV1-46	IGF2R	GC	P4HB	TPM3	PYGB	THBD	LTA4H
DKK1	FKBP9	SNX4	UBE4B	ELP1	GOSR1	KRT75	AGFG2	MAP3K6	SNCG	IGHV3-7	ADH5	PPBP	H1-0	ITGAV	PYGM	PGK2	ALDOC
ADGRL1	PGLS	ZWINT	ELP1	NDUFA3	KAT7	PPP1R3D	PRSS23	PGM3	CIAO1	IGHV2-5	CDK4	TFRC	ACYP1	HEXA	CHRM1	PROS1	C4A
PCF11	PAPSS2	LUC7L3	NDUFA3	NDUFB4	ATE1	BRD1	SCAF4	MOCS3	DFFB	PIGR	PRPS2	TF	FES	EPHX1	SPTB	P4HB	C4B_2
FRYL	SMC2	KIF4A	NDUFB4	NDUFB8	TNKS	POP4	NDUFB6	CD2BP2	SRP72	IGKC	PABPC1	LTF	CSF1R	DBI	LAMP1	H1-0	JMJD7
NFAT5	ATG7	MBD4	NDUFB8	SCEL	CCNDBP1	RAB3D	MFN2	SVIL	DXO	IGHG1	PCNA	HPX	CTSD	LDHB	ERG	ACYP1	MYZAP
ENDOD1	TACC2	SBF1	NDUFA7	NDUFA7	VAPB	SNAP29	DUSP14	PIGN	DDAH1	IGHG2	HARS1	FTL	ANXA2	CENPB	ACADM	FES	SAA1
GLCE	TRIM16	GOSR1	VAMP5	RTN3	RASAL1	OXSR1	UBE4B	BAG4	URI1	IGHG3	COL6A1	FTH1	C8A	GPX1	G6PD	CSF1R	SAA2
GLS	FARS2	KAT7	RTN3	ZNF205	SNAPIN	GGPS1	ELP1	AHSA1	B3GAT3	IGHG4	COL6A2	MT-ND2	C8B	PGK2	UBL4A	CTSD	RO60
HAUS5	ZBTB7A	ATE1	LETM1	LETM1	MPZL1	HSPA4L	UBL3	SLC34A2	MTA2	IGHM	COL6A3	MT-ND4	C8G	PROS1	DMD	ANXA2	GAA
FBXO21	LYPLA2	VAPB	EPN2	EPN2	NDUFC2	PTBP3	NDUFA3	PARN	STK10	IGHA1	F5	MT-ND5	CAPN1	P4HB	MTHFD1	C8A	RRAS
KDM4B	IPO7	SNAPIN	STBD1	STBD1	NDUFA10	TBC1D8	NDUFB4	PSMG1	PRKD3	IGHA2	IMPDH2	MT-ND6	TUBB	H1-0	SCGB1A1	C8B	HLA-C
SOGA1	ARIH2	MPZL1	SNX4	SNX4	FKBP9	LSM8	NDUFB8	SGPL1	TPPP	IGHD	TPR	ANG	CA3	ACYP1	SFTPC	GP1BA	H1-4
USP19	TNFAIP8	NDUFC2	LUC7L3	LUC7L3	PGLS	AP2A1	SCEL	CLDN7	ATG12	HLA-B	CKB	KLKB1	DCN	FES	IGF2R	C8G	DLAT
WDR47	MAP3K6	NDUFA10	KIF20A	KIF20A	SMC2	WIZ	NDUFA7	CTDNEP1	LTN1	HLA-DRA	ANXA3	C4BPA	PSAP	CSF1R	ADH5	CAPN1	PTPRF
AP2A2	PGM3	FKBP9	KIF4A	KIF4A	ATG7	RIGI	VAMP5	NSA2	TOMM70	HLA-DQA1	BCKDHA	VTN	HEXB	CTSD	CDK4	TUBB	TXN
SEC31A	MOCS3	PGLS	MBD4	MBD4	TACC2	STAU1	RTN3	H6PD	IPO13	HLA-DRB1	ACTN1	CAT	CTSL	ANXA2	PRPS2	CA3	COX5B
CLSTN1	CD2BP2	SMC2	SBF1	SBF1	TRIM16	TTC4	LETM1	SEC24A	DDHD2	HLA-DQB1	ACE	GBA1	PFN1	C8A	PABPC1	DCN	CTSA
HEXIM1	TNFRSF6B	ATG7	GOSR1	GOSR1	FARS2	CAVIN2	EPN2	SEC24B	MYO1D	HBD	MYL4	FUCA1	BPGM	C8B	PCNA	PSAP	MGST1
CCNB2	SVIL	TACC2	KAT7	KAT7	ZBTB7A	BAG2	STBD1	ADGRL2	TOX4	COL1A1	CDH1	ALDOA	APRT	GP1BA	HARS1	HEXB	C7
YIF1A	PIGN	TRIM16	VAPB	SLC25A14	LYPLA2	BAG3	ZRANB2	CBX6	SEC24D	COL3A1	XRCC6	CSTB	EPRS1	C8G	COL6A1	CTSL	PRKAR1A
UBR5	BAG4	FARS2	RASAL1	ATE1	IPO7	MAP4K4	SNX4	SLC2A10	SUPT7L	KRT14	XRCC5	ANXA1	CTSB	CAPN1	COL6A2	PFN1	ESD
SCAF4	AHSA1	LYPLA2	SNAPIN	VAPB	ARIH2	MLYCD	LUC7L3	NADK	UFL1	KRT6A	COX4I1	APOB	HSP90AA1	TUBB	COL6A3	BPGM	HSPD1
NDUFB6	PARN	IPO7	MPZL1	SNAPIN	MAP3K6	CRYZL1	MBD4	MPC2	SORBS2	LMNA	IFI30	SOD2	GALT	CA3	SLC25A4	APRT	CLU
MFN2	PSMG1	ARIH2	NDUFA10	MPZL1	SLU7	AIFM1	SBF1	ETHE1	TMCC1	SPTA1	LAMP2	OAT	HNRNPC	DCN	F5	EPRS1	HSPA5
UBE4B	SGPL1	TNFAIP8	FKBP9	NDUFA10	PGM3	CLDN1	GOSR1	ACSL3	PHF14	APOA1	RNH1	TK1	LAMB1	PSAP	IMPDH2	CTSB	LAMC1
ELP1	CLDN7	SLU7	PGLS	FKBP9	GCNT3	EML2	KAT7	POLR1A	TMEM63A	APOE	CYBA	HRG	YES1	HEXB	TPR	HSP90AA1	HSPA8
NDUFA3	CTDNEP1	PGM3	SMC2	CELF2	MOCS3	NUDT14	ATE1	ZBTB11	FARP2	APOA2	CCL2	THY1	LYN	CTSL	CKB	GALT	SLC2A1
NDUFB4	NSA2	MOCS3	ATG7	PGLS	CD2BP2	TSPAN15	VAPB	STAMBP	UBXN7	APOC1	ICAM2	A1BG	TPM2	PFN1	ANXA3	HNRNPC	SLC2A3
NDUFB8	H6PD	CD2BP2	TACC2	SMC2	SVIL	BPNT1	SNAPIN	NTN1	SUN1	APOC3	VCAN	CD74	FH	BPGM	BCKDHA	LAMB1	EPB41
SCEL	SEC24A	MED26	TRIM16	ATG7	PIGN	FADS2	MPZL1	ASMTL	PLPBP	FGA	EEF2	KRT6B	SFTPB	APRT	ACTN1	YES1	PDHB
NDUFA7	SEC24B	ZIC2	FARS2	TRIM16	BAG4	DDAH2	NDUFC2	CDS2	ERLIN2	FGB	KRT10	KRT1	THBS1	EPRS1	ACE	LYN	DBT
RTN3	ADGRL2	SVIL	ZBTB7A	FARS2	AHSA1	C6orf47	NDUFA10	KRT75	PRPF6	FGG	KRT5	S100B	COL1A2	CTSB	CDH1	TPM2	ITGAM
LETM1	CBX6	BAG4	LYPLA2	LYPLA2	PARN	TXNDC12	FKBP9	PPP1R3D	PCF11	MBP	PDIA4	VWF	ANXA6	HSP90AA1	PEPD	FH	PYGB
EPN2	MPC2	AHSA1	IPO7	IPO7	PSMG1	TRUB2	CELF2	POP4	FRYL	SLC4A1	C6	TUBB4A	SERPINA6	GALT	XRCC6	SFTPB	MBL2
STBD1	ETHE1	PARN	ARIH2	ARIH2	SGPL1	SYF2	PGLS	HERC2	NFAT5	CRP	P4HA1	GAPDH	SLC3A2	HNRNPC	XRCC5	THBS1	RALB
ZRANB2	ACSL3	PSMG1	MAP3K6	GJB5	CTDNEP1	MBD3	PAPSS2	RAB3D	ENDOD1	APCS	ACP5	ASL	GUSB	LAMB1	COX4I1	COL1A2	SPTB
SNX4	POLR1A	SGPL1	SLU7	TNFAIP8	NSA2	TOP3B	SMC2	SNAP29	GLCE	C1QA	ALAD	HLA-A	PFKM	YES1	GP1BB	ANXA6	LAMP1
ZWINT	PCNT	CLDN7	PGM3	MAP3K6	H6PD	NUDT3	ATG7	OXSR1	GLS	C1QB	HLA-E	HLA-DPB1	HSP90AB1	LYN	IFI30	CD55	ACADM
LUC7L3	YEATS4	NSA2	MOCS3	SLU7	SEC24A	AGR2	TRIM16	GGPS1	HAUS5	C1QC	LCP1	CAPNS1	SRPRA	TPM2	LAMP2	SERPINA6	TOP1
KIF20A	DUS4L	H6PD	CD2BP2	PGM3	SEC24B	BCL10	FARS2	HSPA4L	FBXO21	C9	PLS3	HSPB1	MMP2	FH	RNH1	SLC3A2	G6PD
KIF4A	STAMBP	SEC24A	MED26	MOCS3	ADGRL2	NDUFB10	LYPLA2	PTBP3	KDM4B	APOH	APEH	TYMS	SOD3	SFTPB	NCAM1	PFKM	PC
MBD4	CPSF4	SEC24B	TNFRSF6B	CD2BP2	CBX6	CLPTM1	IPO7	TBC1D8	SOGA1	LRG1	ETFA	CYBB	CTSG	THBS1	VCAN	HSP90AB1	DMD
SBF1	CDS2	CBX6	SVIL	TNFRSF6B	NADK	MOCS2	ARIH2	STARD3NL	USP19	FN1	GYS1	RPN1	HMBS	COL1A2	EEF2	SRPRA	MTHFD1
GOSR1	EYA4	TDP2	PIGN	SVIL	TDP2	TOMM40	TNFAIP8	LSM8	WDR47	RBP4	PRKAR2A	RPN2	MGP	ANXA6	KRT10	ELANE	EPX
KAT7	PPP1R3D	MPC2	PAPLN	PIGN	MPC2	PEX11B	MAP3K6	AP2A1	AP2A2	AMBP	MIF	GNAI2	ITGA2B	CD55	KRT5	MMP2	SCGB1A1
SLC25A14	BRD1	ETHE1	BAG4	BAG4	ETHE1	PAK4	SLU7	WIZ	SEC31A	ORM1	FOLR2	SLC4A2	LPA	SERPINA6	PDIA4	SOD3	SFTPC
ATE1	POP4	ACSL3	AHSA1	AHSA1	ACSL3	CHEK2	PGM3	RIGI	CLSTN1	AHSG	CD99	ATP1A1	PDHA1	SLC3A2	C6	CTSG	IGF2R
VAPB	HERC2	POLR1A	PARN	PARN	POLR1A	ACTL6A	MOCS3	STAU1	FAM13A	TTR	PRF1	ATP1B1	PLEK	GUSB	F3	HMBS	ADH5
SNAPIN	RAB3D	PCNT	PSMG1	PSMG1	ZBTB11	NSD2	CD2BP2	TTC4	HEXIM1	ALB	PRKCSH	ALDH2	CD14	PFKM	HLA-E	MGP	CDK4
MPZL1	SNAP29	YEATS4	SGPL1	FMNL1	STAMBP	MT-CYB	SVIL	CAVIN2	TJP3	AFP	HCLS1	ITGB3	COL4A2	HSP90AB1	LCP1	ITGA2B	PRPS2
NDUFC2	OXSR1	DUS4L	CLDN7	SGPL1	CPSF4	CYB5A	PIGN	BAG2	YIF1A	GC	FDPS	ITGB2	PTPRC	SRPRA	PLS3	LPA	PABPC1
NDUFA10	GGPS1	ZBTB11	CTDNEP1	CTDNEP1	ASMTL	ADH1C	BAG4	BAG3	UBR5	PPBP	CPM	S100A8	CFH	ASNS	APEH	PDHA1	PCNA
FKBP9	HSPA4L	STAMBP	NSA2	ABCA1	CDS2	LDHA	AHSA1	MAP4K4	REC8	TFRC	COX7A2	SLC25A5	SNRNP70	ELANE	ETFA	CD14	COX6A1
CELF2	PTBP3	CPSF4	H6PD	NSA2	PPP1R3D	ALDH1A1	SLC34A2	MLYCD	AGFG2	TF	NID1	SERPINA5	HCK	MMP2	GYS1	COL4A2	HARS1
PGLS	TBC1D8	CDS2	SEC24A	H6PD	BRD1	GLUD1	PARN	CRYZL1	PRSS23	LTF	AKR1A1	SERPING1	ITGA5	SOD3	PRKAR2A	PTPRC	COL6A1
SMC2	STARD3NL	CEP43	SEC24B	SEC24A	POP4	DHFR	PSMG1	AIFM1	SCAF4	HPX	PKM	CFI	NFIC	CTSG	MIF	CFH	COL6A2
ATG7	LSM8	PPP1R3D	ADGRL2	SEC24B	HERC2	CYB5R3	SGPL1	CLDN1	NDUFB6	FTL	ACYP2	MPO	VIM	HMBS	FOLR2	SNRNP70	COL6A3
TACC2	AP2A1	BRD1	CBX6	MPC2	RAB3D	GSR	CLDN7	EML2	MFN2	FTH1	HSP90B1	PCCA	SERPINF2	MME	PRF1	HCK	F5
TRIM16	WIZ	HERC2	SLC2A10	ETHE1	SNAP29	MT-CO1	CTDNEP1	NUDT14	DUSP14	MT-ND2	IDE	PCCB	RPS17	MGP	PRKCSH	ITGA5	IMPDH2
FARS2	STAU1	RAB3D	TDP2	ACSL3	OXSR1	MT-CO2	NSA2	TSPAN15	UBE4B	MT-ND4	MMP9	ALPL	KRT19	PDHA1	HCLS1	NFIC	TPR
ZBTB7A	TTC4	SNAP29	MPC2	POLR1A	GGPS1	MT-CO3	H6PD	BPNT1	ELP1	MT-ND5	HNRNPL	EIF2S1	KRT7	CD14	FDPS	VIM	CKB
LYPLA2	CAVIN2	OXSR1	ETHE1	PCNT	HSPA4L	SOD1	SEC24A	FADS2	UBL3	MT-ND6	DARS1	ICAM1	GNAI3	COL4A2	CPM	SERPINF2	ANXA3
IPO7	BAG2	GGPS1	ACSL3	YEATS4	PTBP3	CP	SEC24B	DDAH2	GABARAP	ANG	JUP	RPLP1	ANXA5	PTPRC	COX7A2	RPS17	BCKDHA
ARIH2	BAG3	HSPA4L	POLR1A	DUS4L	STARD3NL	PNP	ADGRL2	ABHD16A	NDUFA3	KLKB1	UQCRB	RPLP2	STS	SNRPB2	NID1	KRT19	ACTN1
GJB5	MAP4K4	PTBP3	PCNT	CNOT4	LSM8	HPRT1	CBX6	C6orf47	NDUFB4	MMP1	CPA3	RPLP0	CD63	MET	AKR1A1	KRT7	ACE
TNFAIP8	MLYCD	LSM8	YEATS4	STAMBP	AP2A1	GOT2	MPC2	TXNDC12	NDUFB8	C4BPA	FABP4	JUN	MRPL3	CFH	PKM	GNAI3	MYL4
MAP3K6	CRYZL1	AP2A1	DUS4L	ASMTL	WIZ	EGFR	ETHE1	TRUB2	SCEL	VTN	GLUL	FABP3	SNRPA	SNRNP70	ACYP2	ANXA5	CDH1
SLU7	AIFM1	WIZ	ZBTB11	CDS2	STAU1	PGK1	ACSL3	SYF2	NDUFA7	CAT	AKR1B1	CLEC3B	ENO2	HCK	HSP90B1	CD63	XRCC6
PGM3	CLDN1	STAU1	STAMBP	PPP1R3D	TTC4	AK1	POLR1A	MBD3	VAMP5	GBA1	CPN1	SSB	HBQ1	ITGA5	IDE	SNRPA	XRCC5
MOCS3	EML2	TTC4	CPSF4	POP4	BAG2	PLAU	PCNT	TOP3B	RTN3	FUCA1	GSPT1	SERPINA7	ACAA1	NFIC	MMP9	ENO2	COX4I1
CD2BP2	NUDT14	CAVIN2	ASMTL	RAB3D	BAG3	MT-ATP6	YEATS4	NUDT3	LETM1	ALDOA	ARSA	SERPIND1	GSTP1	VIM	HNRNPL	HBQ1	IFI30
TNFRSF6B	TSPAN15	BAG2	CDS2	SNAP29	MAP4K4	CA2	ZBTB11	AGR2	EPN2	CSTB	EZR	ITGB1	LGALS1	SERPINF2	DARS1	ACAA1	LAMP2
SVIL	BPNT1	BAG3	KRT75	OXSR1	MLYCD	ASS1	CNOT4	BCL10	STBD1	ANXA1	UCHL3	PRKCB	QDPR	RPS17	IDO1	GSTP1	RNH1
PIGN	FADS2	MAP4K4	CEP43	GGPS1	CRYZL1	SERPINC1	STAMBP	NDUFB10	ZRANB2	APOB	HPGD	KRT18	HMGB1	KRT19	JUP	LGALS1	CYBA
BAG4	DDAH2	MLYCD	PPP1R3D	HSPA4L	AIFM1	A2M	NTN1	CLPTM1	SNX4	NR3C1	VAV1	KRT8	RBP1	KRT7	UQCRB	QDPR	ICAM2
AHSA1	TXNDC12	CRYZL1	BRD1	PTBP3	CLDN1	C3	ASMTL	MOCS2	LUC7L3	SOD2	CD46	COL5A2	FBP1	GNAI3	CPA3	HMGB1	VCAN
PARN	TRUB2	AIFM1	POP4	IL33	EML2	CST3	CDS2	TOMM40	MBD4	OAT	NME1	UROD	SPARC	ANXA5	FABP4	RBP1	EEF2
PSMG1	SYF2	CLDN1	HERC2	STARD3NL	LATS1	CSTA	KRT75	PEX11B	SBF1	HRG	NQO1	INSR	TPM1	RPSA	GLUL	FBP1	KRT10
FMNL1	EFEMP2	EML2	RAB3D	LSM8	GNA14	NRAS	PPP1R3D	PAK4	GOSR1	THY1	GNS	LCK	CLTA	CD63	AKR1B1	SPARC	PDIA4
SGPL1	MBD3	LATS1	SNAP29	AP2A1	NUDT14	HRAS	POP4	CHEK2	KAT7	A1BG	ARSB	FYN	CLTB	SNRPA	GSPT1	TPM1	C6
CTDNEP1	TOP3B	TSPAN15	OXSR1	WIZ	TSPAN15	KRAS	HERC2	ACTL6A	ATE1	CD74	RPS2	GLA	ANXA4	ENO2	IFNGR1	CLTA	ALAD
ABCA1	AGR2	BPNT1	GGPS1	STAU1	BPNT1	LDLR	RAB3D	NSD2	TNKS	KRT6B	RPA2	IGKV4-1	CNP	ACAA1	ARSA	CLTB	PRG2
NSA2	BCL10	FADS2	HSPA4L	CAVIN2	FADS2	PIGR	SNAP29	MT-CYB	VAPB	KRT1	MUC1	GSN	HMOX1	GSTP1	EZR	ANXA4	HLA-E
H6PD	NDUFB10	DDAH2	PTBP3	BAG2	DDAH2	HLA-B	OXSR1	CYB5A	SNAPIN	S100B	TIMP2	CDK1	PDGFRB	MMP7	UCHL3	CNP	HLA-DRB4
SEC24A	CLPTM1	ABHD16A	STARD3NL	BAG3	ABHD16A	COL4A1	GGPS1	ADH1C	MPZL1	VWF	CD44	ATP5F1B	DLD	VIL1	HPGD	HMOX1	LCP1
SEC24B	TOMM40	C6orf47	LSM8	MAP4K4	C6orf47	KRT14	HSPA4L	LDHA	NDUFC2	SHBG	NQO2	C2	SNRPA1	LGALS1	CD46	PDGFRB	PLS3
TDP2	PEX11B	TXNDC12	AP2A1	MLYCD	TXNDC12	KRT6A	PTBP3	ALDH1A1	NDUFA10	TUBB4A	SELP	S100A9	CTSH	QDPR	NME1	DLD	APEH
MPC2	PAK4	TRUB2	WIZ	CRYZL1	TRUB2	LMNA	TBC1D8	GLUD1	FKBP9	GAPDH	ITGB4	APOA4	TACSTD2	HMGB1	NQO1	SNRPA1	ETFA
ETHE1	WNT11	ECD	STAU1	AIFM1	SYF2	SPTA1	LSM8	DHFR	CELF2	ASL	CBR1	EIF4E	FGR	RBP1	GNS	CTSH	GYS1
ACSL3	CHEK2	SYF2	TTC4	EML2	MBD3	APOA1	AP2A1	CYB5R3	PGLS	HLA-A	ANK1	ENO1	C1S	FBP1	RPS2	TACSTD2	PRKAR2A
POLR1A	APBA3	MBD3	CAVIN2	NUDT14	TOP3B	APOE	WIZ	GSR	PAPSS2	HLA-DPB1	ACADS	PYGL	PARP1	SPARC	DSP	FGR	ENO3
PCNT	ACTL6A	TOP3B	BAG2	TSPAN15	NUDT3	FGA	RIGI	MT-CO1	SMC2	CAPNS1	CREB1	GPI	IFIT1	TPM1	RPA2	C1S	MIF
YEATS4	NSD2	AGR2	BAG3	BPNT1	AGR2	FGB	STAU1	MT-CO2	ATG7	HSPB1	GLB1	NPM1	ALOX5	CLTA	MUC1	PARP1	FOLR2
STAMBP	MT-CYB	BCL10	MAP4K4	DDAH2	BCL10	FGG	CAVIN2	MT-CO3	TACC2	CYBB	PECAM1	TPM3	UCHL1	CLTB	COX7C	IFIT1	PRF1
ASMTL	CYB5A	NDUFB10	MLYCD	ABHD16A	NDUFB10	MBP	BAG2	SOD1	TRIM16	RPN1	PPP3CB	ITGAV	LTA4H	ANXA4	TIMP2	ALOX5	PRKCSH
CDS2	LDHA	CLPTM1	CRYZL1	C6orf47	CLPTM1	FN1	BAG3	CP	FARS2	RPN2	NCK1	HEXA	ALDOC	CNP	ALOX15	UCHL1	HCLS1
CEP43	ALDH1A1	TOMM40	AIFM1	TXNDC12	MOCS2	ALB	MAP4K4	PNP	ZBTB7A	GNAI2	H1-5	EPHX1	C4A	WNT2	CD44	LTA4H	FDPS
PPP1R3D	GLUD1	PEX11B	CLIC3	TRUB2	TOMM40	TFRC	MLYCD	HPRT1	LYPLA2	SLC4A2	EPCAM	DBI	C4B_2	HMOX1	NQO2	ALDOC	CPM
POP4	DHFR	PAK4	EML2	SYF2	PEX11B	TF	CRYZL1	GOT2	IPO7	ATP1A1	POR	LDHB	SAA2	PDGFRB	SELP	C4A	COX7A2
RAB3D	CYB5R3	WNT11	LATS1	EFEMP2	PAK4	FTH1	AIFM1	EGFR	ARIH2	ATP1B1	EPB42	GPX1	IGHV1-8	DLD	ITGB4	C4B_2	NID1
SNAP29	GSR	CHEK2	NUDT14	MBD3	CHEK2	MT-ND1	CLDN1	PGK1	TNFAIP8	APP	ATP2A2	PGK2	RAP2A	HNRNPA1	CBR1	JMJD7	AKR1A1
OXSR1	MT-CO1	ACTL6A	TSPAN15	TOP3B	APBA3	MT-ND2	EML2	AK1	MAP3K6	ARG1	CD36	PROS1	RO60	SNRPA1	ANK1	SAA1	PKM
GGPS1	MT-CO2	NSD2	BPNT1	BCL10	ACTL6A	MT-ND4	NUDT14	PLAU	SLU7	ALDH2	PLCG2	P4HB	GAA	CTSH	ACADS	SAA2	ACYP2
HSPA4L	MT-CO3	MT-CYB	FADS2	NDUFB10	NSD2	MT-ND5	TSPAN15	MT-ATP6	PGM3	ITGB3	FAH	H1-0	RRAS	TACSTD2	CREB1	RO60	HSP90B1
PTBP3	SOD1	LDHA	DDAH2	CLPTM1	MT-CYB	MT-ND6	BPNT1	ASS1	MOCS3	ITGB2	YBX3	ACYP1	H1-4	FGR	GLB1	GAA	IDE
IL33	CP	ALDH1A1	ABHD16A	MOCS2	CYB5A	MT-ATP8	FADS2	SERPINC1	CD2BP2	S100A8	NAGA	FES	SPP1	C1S	PECAM1	RRAS	GP9
LSM8	F13A1	GLUD1	TXNDC12	TOMM40	LDHA	VTN	DDAH2	SERPINA1	ZFYVE9	SERPINE1	HMGA1	CSF1R	DLAT	PARP1	NCK1	H1-4	MMP9
AP2A1	PNP	DHFR	TRUB2	NAPSA	ALDH1A1	CAT	ABHD16A	C3	SVIL	SERPING1	GOT1	CTSD	TXN	IFIT1	H1-5	DLAT	HNRNPL
WIZ	HPRT1	CYB5R3	ECD	PEX11B	GLUD1	RAF1	C6orf47	CST3	PIGN	CFI	BPI	ANXA2	COX5B	ALOX5	POR	TXN	DARS1
STAU1	GOT2	GSR	EFEMP2	PAK4	DHFR	GBA1	TXNDC12	CSTA	BAG4	MPO	PRKCA	C8A	CTSA	UCHL1	EPB42	COX5B	IDO1
CAVIN2	EGFR	MT-CO1	MBD3	CHEK2	CYB5R3	FUCA1	TRUB2	NRAS	AHSA1	PCCA	ITGA2	C8B	C7	LTA4H	ATP2A2	CTSA	JUP
BAG2	PGK1	MT-CO2	TOP3B	APBA3	GSR	ALDOA	SYF2	HRAS	SLC34A2	PCCB	NPR3	C8G	PRKAR1A	ALDOC	CD36	C7	CPA3
BAG3	AK1	SOD1	AGR2	ACTL6A	MT-CO1	CSTB	MBD3	KRAS	PARN	ALPL	UBTF	CAPN1	UROS	C4A	PLCG2	PRKAR1A	FABP4
MAP4K4	F10	CP	BCL10	CCNE2	MT-CO2	ANXA1	TOP3B	LDLR	PSMG1	EIF2S1	PRKACA	TUBB	ESD	C4B_2	YBX3	ESD	AKR1B1
MLYCD	PLAU	PNP	NDUFB10	NSD2	MT-CO3	NR3C1	NUDT3	PIGR	SGPL1	ICAM1	CAPN2	CA3	HSPD1	ZDHHC11B	NAGA	HSPD1	PVR
CRYZL1	PLAT	HPRT1	CLPTM1	MT-CYB	SOD1	SOD2	AGR2	IGHG1	CLDN7	RPLP1	DES	DCN	CLU	JMJD7	HMGA1	CLU	CPN1
AIFM1	ADA	GOT2	MOCS2	CYB5A	F13A1	OAT	BCL10	IGHG2	CTDNEP1	RPLP2	CEBPB	PSAP	HSPA5	SAA1	GOT1	HSPA5	GSPT1
CLDN1	MT-ATP6	ABL1	TOMM40	LDHA	PNP	TK1	NDUFB10	HLA-B	NSA2	RPLP0	CTPS1	HEXB	LAMC1	POLR1D	PRKCA	LAMC1	IFNGR1
EML2	ASS1	EGFR	NAPSA	ALDH1A1	HPRT1	CD74	CLPTM1	HLA-DQB1	H6PD	JUN	ENG	CTSL	ACP2	RAP2A	ITGA2	ACP2	ARSA
NUDT14	SERPINC1	PGK1	PEX11B	GLUD1	GOT2	KRT6B	MOCS2	MB	SEC24A	FABP3	DDX5	PFN1	HSPA8	RO60	UBTF	HSPA8	EZR
TSPAN15	A2M	AK1	PAK4	DHFR	EGFR	KRT1	TOMM40	COL4A1	SEC24B	POLR3D	PFKL	BPGM	SLC2A1	GAA	PRKACA	SLC2A1	UCHL3
BPNT1	C3	PLAU	WNT11	CYB5R3	PGK1	GAPDH	PEX11B	KRT6A	ADGRL2	CLEC3B	GM2A	APRT	SLC2A3	RRAS	CAPN2	SLC2A3	HPGD
FADS2	CST3	PLAT	CHEK2	GSR	AK1	ASL	PAK4	LMNA	CBX6	SSB	LGALS3	CD3E	EPB41	HLA-C	DES	EPB41	VAV1
DDAH2	CSTA	ADA	APBA3	MT-CO1	F10	HLA-A	CHEK2	APOA1	NADK	SERPINA7	PSMC3	EPRS1	UMPS	SPP1	CTPS1	UMPS	ELN
ABHD16A	HRAS	ASS1	ACTL6A	MT-CO2	ADA	ERBB2	ACTL6A	APOE	TDP2	SERPIND1	TCP1	CTSB	PDHB	DLAT	ENG	PDHB	CD46
C6orf47	KRAS	OAS1	NSD2	MT-CO3	CA2	CAPNS1	NSD2	APOC3	MPC2	ITGB1	PTPN1	HSP90AA1	DBT	PTPRF	DDX5	DBT	NME1
TXNDC12	LDLR	C3	MT-CYB	SOD1	ASS1	HSPB1	MT-CYB	FGB	ETHE1	PRKCB	RPL35A	GALT	ITGAM	TXN	PFKL	ITGAM	NQO1
OLFM2	HLA-B	CST3	CYB5A	CP	SERPINC1	CYP1A1	CYB5A	FGG	ACSL3	KRT18	ITGB5	HNRNPC	PYGB	COX5B	LGALS3	PYGB	GNS
TRUB2	COL4A1	CSTA	LDHA	F13A1	C3	TYMS	LDHA	MBP	POLR1A	KRT8	ARF4	LAMB1	CHRM1	CTSA	PSMC3	PYGM	RPS2
SYF2	KRT14	HRAS	ALDH1A1	PNP	CST3	RPN1	ALDH1A1	SLC4A1	PCNT	COL5A2	RPL7	YES1	RALA	MGST1	TCP1	MBL2	DSP
MBD3	KRT6A	KRAS	GLUD1	HPRT1	CSTA	RPN2	GLUD1	CRP	YEATS4	CD5	VCL	LYN	RALB	C7	PTPN1	RALA	RPA2
TOP3B	LMNA	LDLR	DHFR	GOT2	NRAS	GNAI2	DHFR	FN1	ZBTB11	UROD	LBP	TPM2	SPTB	PRKAR1A	RPL35A	RALB	MUC1
NUDT3	APOA1	IL1A	CYB5R3	EGFR	HRAS	ATP1A1	CYB5R3	ORM1	STAMBP	INSR	PTPRA	FH	LAMP1	ESD	ITGB5	SPTB	CD44
BCL10	APOE	HLA-B	GSR	PGK1	KRAS	ATP1B1	GSR	ALB	NTN1	LCK	RPL17	SFTPB	ACADM	HSPD1	ARF4	LAMP1	NQO2
NDUFB10	APOC3	COL4A1	MT-CO1	AK1	LDLR	APP	MT-CO1	GC	ASMTL	FYN	PGAM1	THBS1	TOP1	CLU	RPL7	ERG	SELP
CLPTM1	FGB	KRT14	MT-CO2	C1R	HLA-B	ALDH2	MT-CO2	TFRC	CDS2	GLA	RCC1	COL1A2	G6PD	MYL2	VCL	ACADM	ITGB4
MOCS2	FGG	KRT6A	MT-CO3	F10	COL4A1	ITGB2	MT-CO3	TF	CEP43	IGKV4-1	SDC1	ANXA6	UBL4A	HSPA5	LBP	TOP1	CBR1
TOMM40	MBP	LMNA	SOD1	PLAU	LMNA	S100A8	SOD1	FTH1	PPP1R3D	GSN	ATP5PF	SERPINA6	PC	LAMC1	PTPRA	G6PD	ANK1
PEX11B	C9	APOA1	CP	PLAT	APOA1	SERPINB2	CP	MT-ND1	POP4	CDK1	KRT4	SLC3A2	MTHFD1	ACP2	NAT1	UBL4A	ACADS
PAK4	FN1	APOE	F13A1	ADA	APOE	CFI	PNP	MT-ND2	HERC2	ATP5F1B	TSPAN8	GUSB	CETP	HSPA8	ITGB6	GNAT1	CREB1
WNT11	ALB	APOC3	PNP	MT-ATP6	APOC3	PCCA	HPRT1	MT-ND4	RAB3D	C2	PLCG1	PFKM	EPX	SLC2A1	SON	PC	GLB1
CHEK2	AFP	FGB	HPRT1	CA2	FGB	PCCB	GOT2	MT-ND5	SNAP29	S100A9	CD58	HSP90AB1	IGF2R	SLC2A3	RPL17	DMD	PECAM1
APBA3	TFRC	FGG	GOT2	ASS1	FGG	EIF2S1	ABL1	MT-ND6	OXSR1	APOA4	VCAM1	SRPRA	ADH5	EPB41	PGAM1	MTHFD1	NCK1
ACTL6A	TF	MBP	EGFR	SERPINC1	MBP	ICAM1	EGFR	MT-ATP8	GGPS1	CD2	NCL	ASNS	CDK4	UMPS	RCC1	CETP	H1-5
NSD2	HPX	FN1	PGK1	A2M	FN1	RPLP1	PGK1	VTN	RAB36	EIF4E	HK1	MMP2	PRPS2	PDHB	SDC1	EPX	POR
MT-CYB	FTL	ALB	AK1	C3	AMBP	RPLP2	AK1	CAT	HSPA4L	ENO1	POLR2C	SOD3	PABPC1	DBT	ATP5PF	SCGB1A1	EPB42
CYB5A	FTH1	AFP	C1R	C5	ALB	RPLP0	HP	RAF1	PTBP3	PYGL	POLR2E	CTSG	PCNA	ITGAM	KRT4	SFTPC	ATP2A2
LDHA	MT-ND1	TFRC	HP	TIMP1	AFP	JUN	F10	GBA1	TBC1D8	GPI	NDUFV2	HMBS	COX6A1	PYGB	TSPAN8	IGF2R	CD36
ALDH1A1	MT-ND4	TF	F10	CST3	TFRC	POLR3D	PLAU	FUCA1	LSM8	NPM1	TRIM21	MGP	HARS1	MBL2	CD58	ADH5	PLCG2
GLUD1	MT-ND5	FTL	PLAU	FOS	TF	SSB	PLAT	ALDOA	AP2A1	TPM3	EIF2AK2	PDHA1	COL6A1	RALA	NCL	CDK4	YBX3
DHFR	MT-ND6	FTH1	PLAT	NRAS	HPX	TFAP2A	CFB	CSTB	WIZ	ITGAV	SRM	PLEK	COL6A2	RALB	HK1	PRPS2	NAGA
CYB5R3	MT-ATP8	MT-ND1	CFB	HRAS	FTL	ITGB1	MT-ATP6	ANXA1	RIGI	HEXA	ORM2	CD14	COL6A3	SPTB	POLR2C	PABPC1	HMGA1
GSR	VTN	MT-ND2	ADA	KRAS	FTH1	KRT18	CA2	APOB	STAU1	EPHX1	ITIH2	COL4A2	SLC25A4	LAMP1	POLR2E	PCNA	GOT1
MT-CO1	HMGCR	MT-ND4	MT-ATP6	LDLR	MT-ND2	KRT8	ASS1	NR3C1	TTC4	DBI	ITIH1	PTPRC	SLC25A6	ACADM	NDUFV2	HARS1	BPI
MT-CO2	CAT	MT-ND5	CA2	TGFB1	MT-ND4	UROD	SERPINC1	SOD2	CAVIN2	LDHB	NFKB1	SNRPB2	F5	TOP1	TRIM21	COL6A1	PRKCA
SOD1	RAF1	MT-ND6	ASS1	IL1A	MT-ND5	INSR	SERPINA1	OAT	BAG2	GPX1	NCF2	CFH	IMPDH2	TOP2A	EIF2AK2	COL6A2	ITGA2
CP	GBA1	MT-ATP8	SERPINC1	IL1B	MT-ND6	GLA	C3	TK1	BAG3	THBD	TYMP	SNRNP70	TPR	G6PD	SRM	COL6A3	UBTF
F13A1	FUCA1	VTN	SERPINA3	HLA-B	MT-ATP8	GSN	TIMP1	CD74	MAP4K4	PGK2	ATP2B1	HCK	CKB	UBL4A	ORM2	SLC25A4	PRKACA
PNP	ALDOA	CAT	A2M	HLA-DQB1	VTN	RB1	CST3	KRT6B	MLYCD	PROS1	HLA-DPA1	ITGA5	FCGR1A	PC	ITIH2	SLC25A6	CAPN2
HPRT1	CSTB	RAF1	C3	MB	HMGCR	PTMA	NRAS	KRT1	CRYZL1	P4HB	EIF2S2	NFIC	ANXA3	MTHFD1	ITIH1	F5	DES
GOT2	ANXA1	GBA1	TIMP1	COL4A1	CAT	CDK1	HRAS	GAPDH	AIFM1	ACYP1	TCN1	VIM	BCKDHA	CETP	NFKB1	IMPDH2	CEBPB
EGFR	APOB	FUCA1	CST3	KRT14	RAF1	ATP5F1B	KRAS	ASL	CLDN1	FES	ANXA7	SERPINF2	ACTN1	EPX	TYMP	TPR	CTPS1
PGK1	PRNP	ALDOA	HRAS	KRT6A	GBA1	EIF4E	LDLR	HLA-A	CLIC3	CSF1R	CCNA2	RPS17	ACE	IGF2R	ATP2B1	CKB	ENG
AK1	SOD2	CSTB	KRAS	LMNA	FUCA1	CEACAM5	PIGR	ERBB2	EML2	CTSD	RAB5A	KRT19	MYL4	ADH5	HLA-DPA1	FCGR1A	DDX5
F10	OAT	ANXA1	LDLR	APOA1	ALDOA	CKM	HLA-B	CAPNS1	LATS1	ANXA2	RAB6A	KRT7	CDH1	CDK4	EIF2S2	ANXA3	PFKL
PLAU	TK1	APOB	EGF	APOE	CSTB	ENO1	HLA-DRA	HSPB1	NUDT14	C8A	MX1	GNAI3	SRC	PRPS2	ANXA7	BCKDHA	CR1
PLAT	KRT1	NR3C1	PIGR	APOC1	ANXA1	PYGL	HLA-DRB1	CYP1A1	TSPAN15	C8B	PSMB1	ANXA5	XRCC6	PABPC1	RAB5A	ACTN1	LGALS3
ADA	SHBG	PRNP	HLA-B	APOC3	NR3C1	GPI	HLA-DQB1	TYMS	BPNT1	C8G	M6PR	KRT16	XRCC5	PCNA	RAB6A	ACE	PSMC3
CA2	TUBB4A	SOD2	MB	FGB	SOD2	POLB	COL1A1	RPN1	FADS2	CAPN1	COX5A	RPSA	COX4I1	COX6A1	MX1	CDH1	TCP1
ASS1	GAPDH	OAT	COL1A1	FGG	OAT	NPM1	KRT14	RPN2	DDAH2	TUBB	LMNB1	CD63	IFI30	HARS1	PSMB1	SRC	PTPN1
SERPINC1	ASL	TK1	COL4A1	C9	TK1	TPM3	KRT6A	GNAI2	ABHD16A	CA3	ITGAL	SNRPA	LAMP2	COL6A1	M6PR	PEPD	ITGB5
A2M	IGKV1-16	KRT6B	KRT14	APOH	KRT1	ITGAV	LMNA	ATP1A1	C6orf47	IVL	ITGAX	ENO2	RNH1	COL6A2	COX5A	XRCC6	ARF4
C3	HLA-A	KRT1	KRT6A	FN1	GAPDH	HEXA	APOA1	ATP1B1	TXNDC12	CHRNG	OGN	ACAA1	CYBA	COL6A3	LMNB1	XRCC5	RPL7
TIMP1	CAPNS1	TUBB4A	LMNA	ALB	ASL	EPHX1	APOE	APP	TRUB2	DCN	CAST	GSTP1	VCAN	SLC25A4	ITGAX	COX4I1	VCL
CST3	TP53	GAPDH	APOA1	AFP	HLA-A	DBI	APOC3	APOD	ECD	PSAP	IMPDH1	CD48	ITGA4	F5	PZP	IFI30	LBP
FOS	HSPB1	ASL	APOE	TFRC	ERBB2	LDHB	FGB	ALDH2	SYF2	HEXB	PTMS	LGALS1	EEF2	IMPDH2	OGN	LAMP2	PTPRA
NRAS	CYP1A1	HLA-A	APOC3	TF	CAPNS1	CENPB	FGG	ITGB2	MBD3	CTSL	GSTM3	QDPR	KRT10	TPR	CAST	RNH1	RPL17
HRAS	TYMS	CAPNS1	FGA	HPX	HSPB1	GPX1	MBP	S100A8	TOP3B	PFN1	ATP6V1B2	HMGB1	KRT13	CKB	PTMS	CYBA	PGAM1
KRAS	RPN1	TP53	FGB	FTL	TYMS	PGK2	LRG1	SERPINB2	NUDT3	BPGM	ATP6V1C1	RBP1	KRT5	FCGR1A	GSTM3	ICAM2	RCC1
LDLR	RPN2	HSPB1	FGG	FTH1	RPN1	P4HB	FN1	SLC25A5	AGR2	APRT	CSRP1	FBP1	PDIA4	ANXA3	ATP6V1B2	VCAN	SDC1
TGFA	GNAI2	CYP1A1	MBP	MT-ND1	RPN2	H1-0	ALB	CFI	IL18BP	EPRS1	FLNA	GNAO1	C6	BMP3	ATP6V1C1	ITGA4	ATP5PF
TGFB1	ATP1A1	TYMS	C9	MT-ND2	GNAI2	ACYP1	AFP	ISG15	BCL10	CTSB	MAOA	SPARC	P4HA1	BCKDHA	CSRP1	EEF2	KRT4
IL1A	ATP1B1	RPN1	APOH	MT-ND4	SLC4A2	CTSD	TFRC	PCCA	NDUFB10	HSP90AA1	ACO1	GSTM1	ACP5	RNASE3	FLNA	KRT10	CD58
IL1B	APP	RPN2	LRG1	MT-ND5	ATP1A1	ANXA2	TF	PCCB	CLPTM1	GALT	NT5E	TPM1	TPT1	ACTN1	MAOA	KRT5	NCL
HLA-B	ALDH2	GNAI2	FN1	MT-ND6	ATP1B1	CAPN1	FTL	EIF2S1	MOCS2	HNRNPC	GPD1	CLTA	ALAD	ACE	ACO1	PDIA4	HK1
HLA-DQB1	S100A8	SLC4A2	ALB	MT-ATP8	APP	TUBB	FTH1	ICAM1	TOMM40	LAMB1	C5AR1	CLTB	F3	CDH1	NT5E	C6	POLR2C
MB	HMGN1	ATP1A1	AFP	KLKB1	ALDH2	PSAP	MT-ND1	RPLP1	PEX11B	YES1	MSR1	ANXA4	PRG2	SRC	GPD1	P4HA1	POLR2E
COL1A1	SERPING1	ATP1B1	TFRC	MMP1	CYP17A1	HEXB	MT-ND2	RPLP2	PAK4	LYN	VDAC1	CNP	HLA-E	XRCC6	VDAC1	ALAD	NDUFV2
COL4A1	ISG15	APP	TF	VTN	S100A8	CTSL	MT-ND4	RPLP0	CHEK2	TPM2	BGN	HMOX1	LCP1	XRCC5	BGN	PRG2	TRIM21
KRT14	PCCA	ALDH2	HPX	CAT	PCCA	PFN1	MT-ND5	JUN	APBA3	FH	SDHB	PDGFRB	PLS3	COX4I1	SDHB	HLA-E	EIF2AK2
KRT6A	PCCB	S100A8	FTL	RAF1	PCCB	BPGM	MT-ND6	POLR3D	ACTL6A	SFTPB	CD9	DLD	APEH	IFI30	CD9	LCP1	SRM
LMNA	EIF2S1	ISG15	FTH1	GBA1	EIF2S1	APRT	MT-ATP8	SSB	NSD2	THBS1	COMT	SNRPA1	ETFA	LAMP2	COMT	PLS3	ORM2
APOA1	ICAM1	PCCA	MT-ND1	FUCA1	ICAM1	EPRS1	VTN	TFAP2A	MT-CYB	SP1	TGM2	CTSH	GYS1	RNH1	TGM2	APEH	ITIH2
APOE	RPLP1	PCCB	MT-ND2	ALDOA	RPLP1	CTSB	CAT	ITGB1	CYB5A	COL1A2	MMUT	CD3G	PRKAR2A	CYBA	BMP5	ETFA	ITIH1
APOC1	RPLP2	EIF2S1	MT-ND4	CSTB	RPLP2	HSP90AA1	RAF1	KRT18	ADH1C	ANXA6	OSBP	TACSTD2	CTSE	VCAN	MMUT	GYS1	NFKB1
APOC3	RPLP0	ICAM1	MT-ND5	ANXA1	RPLP0	GALT	GBA1	KRT8	LDHA	CD55	PCMT1	FGR	FOLR2	ITGA4	OSBP	PRKAR2A	NCF2
FGB	JUN	RPLP1	MT-ND6	APOB	JUN	HNRNPC	FUCA1	UROD	ALDH1A1	SERPINA6	FBL	C1S	PRKCSH	EEF2	PCMT1	ENO3	TYMP
FGG	POLR3D	RPLP2	MT-ATP8	NR3C1	POLR3D	LAMB1	ALDOA	INSR	GLUD1	SLC3A2	GART	PARP1	HCLS1	KRT10	FBL	MIF	ATP2B1
MBP	SSB	RPLP0	MMP1	PRNP	SSB	YES1	CSTB	FYN	DHFR	GUSB	TNXB	IFIT1	FDPS	PDIA4	GART	FOLR2	HLA-DPA1
C9	SERPINA7	JUN	VTN	SOD2	SERPINA7	LYN	ANXA1	GLA	CYB5R3	PFKM	PAICS	ALOX5	CPM	C6	TNXB	PRF1	EIF2S2
APOH	SERPIND1	POLR3D	CAT	OAT	ITGB1	FH	NR3C1	GSN	GSR	HSP90AB1	SCP2	UCHL1	COX7A2	P4HA1	PAICS	PRKCSH	TCN1
FN1	TFAP2A	SSB	RAF1	TK1	PRKCB	SFTPB	SOD2	RB1	MT-CO1	SRPRA	UBA1	LTA4H	NID1	TPT1	SCP2	HCLS1	ANXA7
ALB	ITGB1	SERPINA7	GBA1	KRT6B	KRT18	THBS1	OAT	PTMA	MT-CO2	ASNS	GPX3	ALDOC	AKR1A1	ALAD	UBA1	FDPS	RAB5A
AFP	KRT18	SERPIND1	FUCA1	KRT1	KRT8	SP1	CD74	CDK1	MT-CO3	MMP2	NME2	C4A	PKM	HLA-E	GPX3	CPM	RAB6A
TFRC	KRT8	TFAP2A	ALDOA	SHBG	UROD	IGF1R	KRT6B	ATP5F1B	SOD1	SOD3	FDXR	C4B_2	ACYP2	LCP1	FDXR	COX7A2	MX1
TF	CALB1	ITGB1	CSTB	TUBB4A	GLA	ANXA6	KRT1	S100A9	CP	CTSG	HNRNPA2B1	ATXN1L	HSP90B1	PLS3	HNRNPA2B1	NID1	PSMB1
HPX	MYL1	KRT18	ANXA1	GAPDH	GSN	SLC3A2	GAPDH	EIF4E	F13A1	HMBS	PRKACB	JMJD7	IDE	APEH	UQCRC2	AKR1A1	M6PR
FTL	UROD	KRT8	APOB	ASL	RB1	GUSB	ASL	CEACAM5	PNP	ITGA2B	UQCRC2	SAA1	MMP9	ETFA	CA4	PKM	COX5A
FTH1	INSR	CALB1	NR3C1	HLA-A	PTMA	PFKM	HLA-A	ENO1	HPRT1	PDHA1	CA4	POLR1D	HNRNPL	GYS1	CPN2	ACYP2	LMNB1
MT-ND1	LCK	UROD	SOD2	CAPNS1	CDK1	HSP90AB1	ERBB2	PYGL	GOT2	PLEK	CPN2	FDX1	DARS1	PRKAR2A	FECH	HSP90B1	PZP
MT-ND2	FYN	BCHE	OAT	HSPB1	ATP5F1B	SRPRA	CAPNS1	GPI	ABL1	CD14	FECH	RAP2A	JUP	ENO3	MMP8	IDE	OGN
MT-ND4	BCHE	GLA	TK1	TYMS	EIF4E	ASNS	HSPB1	POLB	EGFR	COL4A2	MMP8	RO60	UQCRB	MTHFD2	MRC1	GP9	CAST
MT-ND5	GLA	GSN	KRT6B	RPN1	CEACAM5	HMBS	CYP1A1	NPM1	PGK1	PTPRC	MRC1	GAA	CPA3	SELL	CES1	MMP9	IMPDH1
MT-ND6	GSN	RB1	KRT1	RPN2	CKM	PDHA1	RPN1	TPM3	AK1	SNRPB2	CES1	RRAS	GLUL	MIF	FBLN1	HNRNPL	PTMS
MT-ATP8	RB1	PTMA	SHBG	GNAI2	ENO1	COL4A2	RPN2	ITGAV	F10	MET	FBLN1	HLA-C	AKR1B1	FOLR2	TCEA1	DARS1	GSTM3
MMP1	CDK1	CDK1	TUBB4A	SLC4A2	PYGL	CYC1	GNAI2	HEXA	PLAU	MELTF	TCEA1	ARAF	ANPEP	PRKCSH	PTGS1	JUP	ATP6V1B2
VTN	ATP5F1B	ATP5F1B	GAPDH	ATP1A1	GPI	SNRPB2	SLC4A2	EPHX1	PLAT	CFH	PTGS1	H1-4	CPN1	HCLS1	ITGA6	UQCRB	CSRP1
CAT	S100A9	S100A9	ASL	ATP1B1	POLB	MET	ATP1A1	DBI	CFB	SNRNP70	ITGA6	SPP1	GSPT1	FDPS	SFPQ	CPA3	FLNA
RAF1	S100A6	EIF4E	HLA-A	APP	NPM1	CFH	ATP1B1	LDHB	ADA	HCK	SFPQ	DLAT	MYOD1	CPM	PPIB	FABP4	MAOA
GBA1	EIF4E	CEACAM5	ERBB2	ARG1	TPM3	SNRNP70	APP	CENPB	MT-ATP6	ITGA5	KEL	PTPRF	IFNGR1	COX7A2	ME2	GLUL	ACO1
FUCA1	CKM	CKM	CAPNS1	ALDH2	ITGAV	NFIC	APOD	GPX1	CA2	NFIC	PPIB	TXN	ARSA	NID1	WARS1	AKR1B1	GPD1
ALDOA	ENO1	ENO1	HSPB1	ITGB2	HEXA	VIM	ALDH2	THBD	ASS1	VIM	ME2	COX5B	B4GALT1	AKR1A1	RPS3	ANPEP	C5AR1
CSTB	PYGL	PYGL	TYMS	S100A8	EPHX1	RPS17	ITGB3	PGK2	SERPINC1	SERPINF2	WARS1	CTSA	EZR	PKM	JAK1	CPN1	VDAC1
ANXA1	GPI	GPI	RPN1	SERPINB2	DBI	KRT19	ITGB2	P4HB	C3	RPS17	RPS3	MGST1	UCHL3	HSP90B1	PTPRE	GSPT1	BGN
APOB	POLB	POLB	RPN2	SERPINE1	FABP1	KRT7	S100A8	H1-0	CST3	F7	JAK1	C7	HPGD	IDE	PTPRG	IFNGR1	SDHB
NR3C1	NPM1	NPM1	GNAI2	SLC25A5	LDHB	GNAI3	HMGN1	ACYP1	CSTA	KRT19	PTPRB	PRKAR1A	VAV1	MMP9	SP100	ARSA	CD9
PRNP	TPM3	TPM3	SLC4A2	SERPING1	CENPB	ANXA5	SLC25A5	CTSD	HRAS	KRT7	PTPRE	ESD	ELN	HNRNPL	AHCY	B4GALT1	COMT
SOD2	ITGAV	ITGAV	ATP1A1	MPO	GPX1	KRT16	SERPING1	ANXA2	KRAS	GNAI3	PTPRG	HSPD1	CD46	DARS1	CFL1	EZR	TGM2
OAT	HEXA	HEXA	ATP1B1	PCCA	THBD	RPSA	CFI	CAPN1	LDLR	ANXA5	SP100	CLU	NME1	JUP	EIF4B	UCHL3	MMUT
TK1	EPHX1	EPHX1	APP	PCCB	PGK2	CD63	ISG15	TUBB	EGF	KRT16	AHCY	HSPA5	GNS	UQCRB	ATP2B4	HPGD	OSBP
KRT6B	DBI	DBI	ARG1	ALPL	P4HB	MRPL3	PCCA	PSAP	TGFB1	RPSA	CFL1	LAMC1	PHKG2	CPA3	CPT2	ELN	PCMT1
KRT1	LDHB	LDHB	ALDH2	EIF2S1	ACYP1	SNRPA	PCCB	HEXB	PIGR	CD63	EIF4B	ACP2	ARSB	GLUL	DTYMK	CD46	FBL
SHBG	CENPB	CENPB	ITGB2	ICAM1	CTSD	ENO2	EIF2S1	CTSL	HLA-B	MRPL3	ATP2B4	HSPA8	RPS2	AKR1B1	CMA1	NME1	GART
TUBB4A	GPX1	GPX1	S100A8	RPLP1	ANXA2	ACAA1	ICAM1	PFN1	MB	SNRPA	CPT2	SLC2A1	ST6GAL1	ANPEP	LAMA2	GNS	TNXB
GAPDH	THBD	PGK2	HMGN1	RPLP2	CAPN1	GSTP1	RPLP1	BPGM	COL4A1	ENO2	DTYMK	EPB41	DSP	CPN1	COX7A1	ARSB	PAICS
ASL	PGK2	P4HB	SERPING1	RPLP0	TUBB	LGALS1	RPLP2	APRT	KRT14	ACAA1	CMA1	UMPS	RPA2	GSPT1	EEF1B2	RPS2	IDS
HLA-A	P4HB	ACYP1	CFI	JUN	PSAP	QDPR	RPLP0	EPRS1	KRT6A	GSTP1	FCAR	PDHB	MUC1	IFNGR1	ATP5PB	RPA2	SCP2
ERBB2	ACYP1	CTSD	MPO	SSB	HEXB	HMGB1	JUN	CTSB	LMNA	SNRPC	COX7A1	DBT	COX7C	ARSA	TBXAS1	MUC1	UBA1
CAPNS1	CTSD	ANXA2	PCCA	SERPINA7	CTSL	RBP1	POLR3D	HSP90AA1	APOA1	CD48	KDELR1	ITGAM	CD44	B4GALT1	ACP1	COX7C	GPX3
HSPB1	ANXA2	CAPN1	PCCB	SERPIND1	PFN1	FBP1	SSB	GALT	APOE	LGALS1	EEF1B2	PYGB	ITGB4	ACP3	ACAT1	TIMP2	FDXR
TYMS	CAPN1	TUBB	EIF2S1	TFAP2A	APRT	SPARC	SERPINA7	HNRNPC	APOC3	QDPR	ATP5PB	RALA	CBR1	EZR	TNC	ALOX15	HNRNPA2B1
RPN1	TUBB	IVL	ICAM1	ITGB1	EPRS1	TPM1	SERPIND1	LAMB1	FGB	HMGB1	TBXAS1	RALB	ANK1	UCHL3	MYL9	CD44	UQCRC2
RPN2	PSAP	PSAP	RPLP1	KRT18	CTSB	CLTA	ITGB1	YES1	FGG	RBP1	ACP1	SPTB	ACADS	VAV1	POLR2A	NQO2	CPN2
GNAI2	HEXB	HEXB	RPLP2	KRT8	HSP90AA1	CLTB	KRT18	LYN	MBP	FBP1	ACAT1	LAMP1	CREB1	ELN	AZGP1	SELP	FECH
SLC4A2	CTSL	CTSL	RPLP0	MYL1	GALT	ANXA4	KRT8	FH	FN1	SPARC	TNC	ACADM	GLB1	CSF2RA	MPST	ITGB4	MMP8
ATP1A1	PFN1	PFN1	JUN	UROD	HNRNPC	CNP	UROD	SFTPB	ALB	TPM1	MYL9	TOP1	PECAM1	CD46	RPS12	SPN	MRC1
ATP1B1	BPGM	BPGM	SSB	INSR	LAMB1	DLD	INSR	ERCC1	TFRC	CLTA	POLR2A	TOP2A	PPP3CB	NME1	DNAJB1	CBR1	CES1
APP	APRT	APRT	SERPINA7	LCK	YES1	HNRNPA1	FYN	THBS1	TF	CLTB	CDK2	G6PD	NCK1	NQO1	ATP5F1A	ANK1	FBLN1
ARG1	EPRS1	EPRS1	SERPIND1	FYN	LYN	SNRPA1	GLA	SP1	FTL	ANXA4	GRK2	UBL4A	H1-5	GNS	CTSS	ACADS	PTGS1
ALDH2	CTSB	CTSB	TFAP2A	GLA	FH	CTSH	GSN	IGF1R	FTH1	CNP	AZGP1	PC	EPCAM	ARSB	PSMA1	CREB1	ITGA6
ITGB3	HSP90AA1	HSP90AA1	ITGB1	GSN	ERCC1	COX6C	RB1	ANXA6	MT-ND1	HMOX1	MPST	MTHFD1	POR	RPS2	PSMA2	GLB1	SFPQ
ITGB2	GALT	GALT	KRT18	CDK1	THBS1	TACSTD2	CDK1	NGFR	MT-ND4	PDGFRB	LAMA1	CETP	EPB42	DSP	PSMA3	PECAM1	KEL
S100A8	HNRNPC	HNRNPC	KRT8	ATP5F1B	SP1	PARP1	ATP5F1B	SLC3A2	MT-ND5	DLD	YY1	EPX	ATP2A2	RPA2	PSMA4	NCK1	PPIB
HMGN1	LAMB1	LAMB1	MYL1	S100A9	IGF1R	POLA1	C2	GUSB	MT-ND6	SNRPA1	DNAJB1	IGF2R	CD36	MUC1	S100P	H1-5	ME2
SERPINB2	YES1	YES1	UROD	S100A6	ANXA6	IFIT1	EIF4E	PFKM	MT-ATP8	CTSH	ATP5F1A	ADH5	PLCG2	COX7C	NFKBIA	EPCAM	WARS1
SERPINE1	LYN	LYN	FYN	EIF4E	SLC3A2	LTA4H	CEACAM5	HSP90AB1	VTN	CD3G	CTSS	CDK4	YBX3	TIMP2	ITGA3	POR	RPS3
SERPING1	FH	FH	GLA	CKM	GUSB	ALDOC	CKM	SRPRA	CAT	TACSTD2	PSMA1	MS4A1	NAGA	CD44	PTX3	EPB42	JAK1
ISG15	ERCC1	ERCC1	GSN	ENO1	PFKM	ATXN1L	ENO1	ASNS	RAF1	FGR	PSMA2	PRPS2	RHOQ	ITGB4	MSN	ATP2A2	PTPRE
MPO	THBS1	SP1	RB1	PYGL	HSP90AB1	JMJD7	PYGL	HMBS	GBA1	C1S	PSMA3	PABPC1	HMGA1	CBR1	DDX6	CD36	PTPRG
PCCA	SP1	IGF1R	CDK1	GPI	SRPRA	DERPC	GPI	PDHA1	FUCA1	PARP1	PSMA4	PCNA	GOT1	ANK1	U2AF2	PLCG2	SP100
PCCB	IGF1R	ANXA6	ATP5F1B	POLB	ASNS	POLR1D	POLB	COL4A2	ALDOA	ALOX5	S100P	COX6A1	BPI	ACADS	RPL13	YBX3	AHCY
EIF2S1	ANXA6	NGFR	S100A9	NPM1	HMBS	RAP2A	NPM1	CYC1	CSTB	UCHL1	ITGA3	HARS1	PRKCA	CREB1	IVD	NAGA	CFL1
ICAM1	NGFR	SLC3A2	EIF4E	TPM3	PDHA1	RO60	TPM3	SNRPB2	ANXA1	LTA4H	MSN	COL6A1	JUNB	GLB1	S100A4	RHOQ	EIF4B
RPLP1	SLC3A2	PFKM	CKM	ITGAV	COL4A2	COX8A	ITGAV	MET	APOB	ALDOC	DDX6	COL6A2	ITGA2	PECAM1	MGAT1	HMGA1	ATP2B4
RPLP2	GUSB	HSP90AB1	ENO1	HEXA	CYC1	GAA	HEXA	CFH	NR3C1	C4A	U2AF2	COL6A3	SMPD1	H1-5	HMGB2	GOT1	CPT2
RPLP0	PFKM	SRPRA	PYGL	EPHX1	PTPRC	RRAS	EPHX1	SNRNP70	SOD2	C4B_2	RPL13	SLC25A6	UBTF	H1-2	PTBP1	BPI	DTYMK
JUN	HSP90AB1	ASNS	GPI	DBI	SNRPB2	HLA-C	DBI	NFIC	OAT	SAA1	IVD	IMPDH2	NDUFB7	EPCAM	VARS1	PRKCA	CMA1
POLR3D	SRPRA	HMBS	POLB	LDHB	MET	ARAF	LDHB	VIM	TK1	IGHV1-8	S100A4	TPR	PRKACA	POR	EEF1G	ITGA2	LAMA2
SSB	ASNS	PDHA1	NPM1	NEFL	MELTF	H1-4	CENPB	RPS17	CD74	POLR1D	MGAT1	CKB	CAPN2	ATP2A2	FKBP2	NPR3	FCAR
SERPINA7	HMBS	COL4A2	TPM3	CENPB	SNRNP70	DLAT	GPX1	KRT19	KRT6B	RAP2A	HMGB2	FCGR1A	DES	PLCG2	STOM	UBTF	KDELR1
SERPIND1	MME	CYC1	ITGAV	GPX1	ITGA5	PTPRF	THBD	KRT7	KRT1	RNASE2	PTBP1	ANXA3	CEBPB	STMN1	PON1	PRKACA	EEF1B2
TFAP2A	PDHA1	SNRPB2	HEXA	THBD	NFIC	NR2F6	PGK2	GNAI3	GAPDH	RO60	TARS1	CKMT1B	CTPS1	YBX3	MAOB	CAPN2	ATP5PB
ITGB1	COL4A2	SNRNP70	EPHX1	PGK2	SERPINF2	TXN	P4HB	ANXA5	ASL	GAA	VARS1	BCKDHA	ENG	NAGA	YWHAQ	DES	TBXAS1
KRT18	CYC1	HCK	TH	P4HB	RPS17	COX5B	H1-0	KRT16	HLA-A	RRAS	EEF1G	ACTN1	DDX5	HMGA1	MAPK3	CEBPB	ACP1
KRT8	SNRPB2	NFIC	DBI	ACYP1	KRT19	CTSA	ACYP1	RPSA	ERBB2	HLA-C	FKBP2	ACE	PFKL	GOT1	RPL10	CTPS1	ACAT1
MYL1	MET	RPS17	LDHB	CTSD	KRT7	MGST1	CTSD	CD63	CAPNS1	ARAF	STOM	CDH1	GM2A	BPI	COL8A1	ENG	TNC
UROD	MELTF	KRT19	CENPB	ANXA2	GNAI3	PRKAR1A	ANXA2	MRPL3	TP53	H1-4	PON1	SRC	CR1	PRKCA	RPA1	DDX5	MYL9
INSR	SNRNP70	GNAI3	GPX1	C8B	ANXA5	ESD	CAPN1	SNRPA	HSPB1	SPP1	MAOB	PEPD	LGALS3	ITGA2	APEX1	PFKL	POLR2A
LCK	ITGA5	ANXA5	THBD	CAPN1	RPSA	HSPD1	TUBB	ENO2	TYMS	DLAT	YWHAQ	XRCC6	IGFBP3	NPR3	DCK	GM2A	CDK2
FYN	NFIC	KRT16	PGK2	TUBB	CD63	CLU	PSAP	ACAA1	RPN1	PTPRF	MAPK3	XRCC5	PSMC3	UBTF	CAD	CR1	NFYB
GLA	VIM	RPSA	P4HB	CA3	MRPL3	HSPA5	HEXB	GSTP1	RPN2	TXN	RPL10	COX4I1	TCP1	PRKACA	CALR	LGALS3	AZGP1
GSN	SERPINF2	CD63	ACYP1	PSAP	SNRPA	LAMC1	CTSL	LGALS1	GNAI2	COX5B	RPA1	IFI30	PTPN1	CAPN2	MAP4	PSMC3	MPST
CDK1	RPS17	MRPL3	CTSD	HEXB	ENO2	MYH3	PFN1	QDPR	SLC4A2	CTSA	APEX1	LAMP2	RPL35A	DES	CANX	TCP1	RPS12
ATP5F1B	KRT19	SNRPA	ANXA2	CTSL	ACAA1	ACP2	BPGM	HMGB1	ATP1A1	MGST1	CAD	RNH1	ITGB5	CTPS1	PSMB8	PTPN1	YY1
S100A9	KRT7	ENO2	C8B	PFN1	GSTP1	MAP2	APRT	RBP1	ATP1B1	C7	CALR	CYBA	ARF4	ENG	PSMB9	RPL35A	DNAJB1
EIF4E	GNAI3	ACAA1	CAPN1	BPGM	VIL1	HSPA8	EPRS1	FBP1	APP	PRKAR1A	MAP4	ICAM2	RPL7	DDX5	PSMA5	ITGB5	DNAJB2
CKM	ANXA5	GSTP1	TUBB	APRT	LGALS1	SLC2A1	CTSB	SPARC	ALDH2	UROS	CANX	VCAN	VCL	PFKL	HLA-DMB	ARF4	ATP5F1A
ENO1	KRT16	SNRPC	PSAP	EPRS1	QDPR	EPB41	HSP90AA1	TPM1	ITGB2	ESD	PSMB8	ITGA4	GPX2	CR1	PSMB4	RPL7	CTSS
PYGL	RPSA	LGALS1	HEXB	CTSB	HMGB1	UMPS	GALT	CLTA	S100A8	HSPD1	PSMB9	EEF2	LBP	LGALS3	PSMB6	VCL	PSMA1
GPI	CD63	QDPR	CTSL	HSP90AA1	FBP1	PDHB	HNRNPC	CLTB	SERPINB2	CLU	PSMA5	KRT10	PTPRA	IGFBP3	PSMB5	LBP	PSMA2
POLB	MRPL3	HMGB1	PFN1	GALT	SPARC	DBT	LAMB1	ANXA4	SERPING1	HSPA5	HLA-DMA	KRT5	ITGB6	PSMC3	GSTM2	PTPRA	PSMA3
NPM1	SNRPA	RBP1	BPGM	HNRNPC	TPM1	PYGB	YES1	CNP	CFI	LAMC1	HLA-DMB	PDIA4	SON	TCP1	ABCD3	NAT1	S100P
TPM3	ENO2	FBP1	APRT	LAMB1	CLTA	RALA	LYN	DLD	ISG15	ACP2	PSMB4	C6	RPL17	PTPN1	ITPRID2	ITGB6	ITGA3
ITGAV	ACAA1	GNAO1	EPRS1	YES1	CLTB	RALB	FH	SNRPA1	PCCA	HSPA8	PSMB6	P4HA1	PGAM1	RPL35A	ACADL	SON	PTX3
HEXA	GSTP1	TPM1	CTSB	LYN	ANXA4	BCR	SFTPB	CTSH	PCCB	SLC2A1	PSMB5	ZNF35	RCC1	ITGB5	NDUFS1	RPL17	MSN
EPHX1	LGALS1	CLTA	HSP90AA1	FH	CNP	LAMP1	ERCC1	COX6C	ALPL	SLC2A3	GSTM2	ACP5	SDC1	ARF4	MAPK1	PGAM1	DDX6
TH	QDPR	CLTB	GALT	SFTPB	HMOX1	ACADM	THBS1	TACSTD2	EIF2S1	EPB41	ABCD3	TPT1	ATP5PF	RPL7	GCA	RCC1	U2AF2
DBI	HMGB1	ANXA4	HNRNPC	ERCC1	DLD	TOP1	SP1	PARP1	ICAM1	UMPS	TMOD1	ALAD	PLCG1	VCL	PTPRM	SDC1	RPL13
LDHB	RBP1	CNP	LAMB1	THBS1	HNRNPA1	TOP2A	IGF1R	POLA1	RPLP1	PDHB	NDUFS1	PRG2	CD58	GPX2	LAP3	ATP5PF	IVD
NEFL	GNAO1	HMOX1	YES1	ANXA6	SNRPA1	G6PD	ANXA6	ALPI	RPLP2	DBT	MAPK1	HLA-E	VCAM1	LBP	CD34	KRT4	S100A4
CENPB	SPARC	DLD	LYN	NGFR	CTSH	UBL4A	NGFR	LTA4H	RPLP0	ITGAM	GCA	HLA-DRB4	NCL	PTPRA	TPP2	TSPAN8	MGAT1
GPX1	TPM1	HNRNPA1	FH	CD55	TACSTD2	ESRRA	SLC3A2	ALDOC	POLR3D	PYGB	LAP3	LCP1	HK1	ITGB6	IMPA1	PLCG1	HMGB2
THBD	CLTA	SNRPA1	SFTPB	SLC3A2	PARP1	PC	GUSB	FBXO45	SSB	MBL2	CD34	PLS3	POLR2C	SON	PTPN6	CD58	PTBP1
PGK2	CLTB	COX6C	THBS1	GUSB	POLA1	DMD	PFKM	JMJD7	SERPINA7	RALA	TPP2	APEH	POLR2E	RPL17	TKT	VCAM1	TARS1
PROS1	ANXA4	TACSTD2	SP1	PFKM	UCHL1	MTHFD1	HSP90AB1	DERPC	TFAP2A	RALB	IMPA1	ETFA	NDUFV2	PGAM1	CASP1	NCL	VARS1
P4HB	CNP	PARP1	IGF1R	HSP90AB1	LTA4H	EPX	SRPRA	SAA1	ITGB1	SPTB	PTPN6	GYS1	TRIM21	RCC1	LMOD1	HK1	EEF1G
H1-0	DLD	POLA1	ANXA6	SRPRA	ALDOC	SCGB1A1	ASNS	POLR1D	KRT18	LAMP1	TKT	PRKAR2A	EIF2AK2	SDC1	PML	POLR2C	FKBP2
ACYP1	HNRNPA1	UCHL1	NGFR	ASNS	C4A	IGF2R	SOD3	FDX1	KRT8	ACADM	CASP1	ANXA8	SRM	ATP5PF	SERPINA4	POLR2E	STOM
CTSD	SNRPA1	LTA4H	SLC3A2	SYP	TFPT	ADH5	HMBS	RAP2A	UROD	TOP1	LMOD1	GTF2F2	ORM2	KRT4	EEF1D	NDUFV2	PON1
ANXA2	CTSH	ALDOC	GUSB	MMP2	FBXO45	CDK4	PDHA1	RO60	INSR	TOP2A	PML	MTHFD2	CSNK2A2	TSPAN8	OAS2	TRIM21	MAOB
C8B	COX6C	TFPT	PFKM	HMBS	ATXN1L	PRPS2	COL4A2	COX8A	FYN	G6PD	SERPINA4	SELL	ITIH2	UGT1A6	MARCKS	EIF2AK2	YWHAQ
CAPN1	TACSTD2	ATXN1L	HSP90AB1	MME	JMJD7	PABPC1	CYC1	GAA	BCHE	PC	EEF1D	MIF	ITIH1	CD58	AQP1	SRM	MAPK3
TUBB	PARP1	JMJD7	SRPRA	PDHA1	POLR2M	PCNA	SNRPB2	RRAS	GLA	MTHFD1	OAS2	FOLR2	NFKB1	VCAM1	GNA11	ORM2	RPL10
PSAP	POLA1	DERPC	ASNS	CD14	DERPC	KRT3	MET	HLA-C	GSN	EPX	MARCKS	PRKCSH	NCF2	NCL	PBLD	CSNK2A2	COL8A1
HEXB	UCHL1	ZNF853	SYP	COL4A2	POLR1D	COX6A1	CFH	ARAF	RB1	IGF2R	AQP1	HCLS1	TYMP	HK1	ERP29	ITIH2	RPA1
CTSL	LTA4H	POLR1D	HMBS	CYC1	RAP2A	HARS1	SNRNP70	H1-4	CDK1	ADH5	GNA11	FDPS	ATP2B1	POLR2C	PRDX6	ITIH1	APEX1
PFN1	ALDOC	RAP2A	MME	PTPRC	RO60	COL6A3	NFIC	DLAT	ATP5F1B	CDK4	ALDH4A1	CPM	HLA-DPA1	POLR2E	BLVRB	NFKB1	CD82
APRT	C4A	RO60	PDHA1	SNRPB2	COX8A	SLC25A4	VIM	PTPRF	S100A9	PRPS2	ERP29	COX7A2	EIF2S2	NDUFV2	PRDX5	NCF2	CAD
EPRS1	TFPT	COX8A	CD14	MET	GAA	SLC25A6	RPS17	NR2F6	S100A6	PABPC1	PRDX6	NID1	ANXA7	TRIM21	DDT	TYMP	CALR
CTSB	CCDC175	GAA	COL4A2	MELTF	RRAS	IMPDH2	KRT19	TXN	EIF4E	PCNA	BLVRB	AKR1A1	SDS	EIF2AK2	GCHFR	ATP2B1	MAP4
LDHC	ATXN1L	RRAS	CYC1	CFH	HLA-C	TPR	KRT7	COX5B	CEACAM5	COX6A1	PRDX5	PKM	AZU1	SRM	PRDX3	HLA-DPA1	CANX
HSP90AA1	JMJD7	HLA-C	SNRPB2	SNRNP70	ARAF	CKB	GNAI3	CTSA	CKM	HARS1	DDT	ACYP2	ALOX5AP	SLC9A1	ATP5F1D	EIF2S2	PIK3R1
GALT	DERPC	ARAF	MELTF	ITGA5	H1-4	ANXA3	ANXA5	MGST1	ENO1	COL6A1	PRDX3	HSP90B1	RAB5A	ORM2	RPL12	TCN1	PSMB8
HNRNPC	POLR1D	H1-4	SNRNP70	NFIC	SPP1	CKMT1B	RPSA	PRKAR1A	PYGL	COL6A2	ATP5F1D	MYL6B	RAB6A	CSNK2A2	ECHS1	ANXA7	PSMB9
LAMB1	RAP2A	DLAT	ITGA5	VIM	DLAT	BCKDHA	CD63	UROS	GPI	COL6A3	RPL12	IDE	MX1	ITIH2	CMPK1	ALOX5AP	PSMA5
YES1	RO60	PTPRF	NFIC	SERPINF2	PTPRF	ACTN1	MRPL3	ESD	POLB	IMPDH2	ECHS1	HNRNPL	MX2	ITIH1	PEBP1	RAB5A	HLA-DMB
FH	COX8A	NR2F6	VIM	RPS17	NR2F6	CDH1	SNRPA	HSPD1	NPM1	TPR	CMPK1	DARS1	PSMB1	NFKB1	PDIA3	RAB6A	PSMB4
ERCC1	GAA	TXN	SERPINF2	GNAI3	TXN	SRC	ENO2	CLU	TPM3	CKB	PEBP1	IDO1	M6PR	NCF2	PPP2R1A	MX1	PSMB6
THBS1	RRAS	COX5B	RPS17	ANXA5	COX5B	PEPD	ACAA1	HSPA5	ITGAV	FCGR1A	PDIA3	JUP	COX5A	TYMP	NMT1	MX2	PSMB5
SP1	HLA-C	CTSA	KRT19	KRT16	CTSA	XRCC6	GSTP1	LAMC1	HEXA	ANXA3	PPP2R1A	UQCRB	LMNB1	ATP2B1	HLA-F	PSMB1	GSTM2
IGF1R	ARAF	MGST1	KRT7	RPSA	MGST1	XRCC5	LGALS1	ACP2	EPHX1	CKMT1B	PPP2R1B	CPA3	ITGAL	HLA-DPA1	HMOX2	M6PR	ABCD3
ANXA6	H1-4	PRKAR1A	GNAI3	CD63	MAPT	UNG	QDPR	MAP2	DBI	BCKDHA	NMT1	FABP4	ITGAX	EIF2S2	ADSS2	COX5A	TMOD1
NGFR	SPP1	ESD	ANXA5	MRPL3	PRKAR1A	NR2C1	HMGB1	HSPA8	LDHB	ACTN1	HLA-F	GLUL	PZP	TCN1	LRPAP1	LMNB1	NDUFS1
CD55	DLAT	HSPD1	KRT16	SNRPA	ESD	COX4I1	RBP1	SLC2A1	CENPB	ACE	HMOX2	AKR1B1	OGN	ANXA7	ADSL	ITGAL	POLD1
SLC3A2	PTPRF	CLU	RPSA	ENO2	HSPD1	ALAS1	FBP1	EPB41	GPX1	CDH1	ADSS2	CPN1	CAST	TBP	PKLR	ITGAX	MAPK1
GUSB	NR2F6	HSPA5	CD63	ACAA1	CLU	LAMP2	SPARC	UMPS	PGK2	SRC	LRPAP1	GSPT1	IMPDH1	ALOX5AP	CLIP1	PZP	GCA
PFKM	TXN	LAMC1	MRPL3	GSTP1	HSPA5	RNH1	GSTM1	PDHB	P4HB	XRCC6	ADSL	IFNGR1	COL5A1	RAB3B	SRI	OGN	PTPRM
HSP90AB1	COX5B	ACP2	SNRPA	MMP10	LAMC1	CYP4B1	TPM1	DBT	ACYP1	XRCC5	PKLR	ARSA	PTMS	RAB4A	GSTT1	CAST	LAP3
SRPRA	CTSA	MAP2	ENO2	LGALS1	ACP2	ITGA4	CLTA	PYGB	CTSD	UNG	CLIP1	B4GALT1	PRPS1L1	RAB5A	SERPINB1	IMPDH1	CD34
ASNS	MGST1	HSPA8	ACAA1	QDPR	MAP2	ATP1A3	CLTB	RALA	ANXA2	COX4I1	SRI	EZR	GSTM3	RAB6A	ALDH1B1	COL5A1	TPP2
SYP	PRKAR1A	SLC2A1	GSTP1	HMGB1	HSPA8	EEF2	ANXA4	RALB	CAPN1	IFI30	GSTT1	ATF2	ATP6V1B2	MX1	ALDH3A1	PTMS	IMPA1
HMBS	ESD	EPB41	LGALS1	RBP1	SLC2A1	KRT10	CNP	BCR	TUBB	LAMP2	SERPINB1	UCHL3	ATP6V1C1	MX2	SDHA	GSTM3	PTPN6
MME	HSPD1	UMPS	QDPR	SPARC	EPB41	KRT13	CSF1	LAMP1	IVL	RNH1	ALDH1B1	FOSL2	CSRP1	PSMB1	CORO1A	ATP6V1B2	TKT
PDHA1	CLU	PDHB	HMGB1	GSTM1	UMPS	KRT5	DLD	ACADM	PSAP	CYBA	SDHA	VAV1	FLNA	M6PR	GDI1	ATP6V1C1	CASP1
CD14	HSPA5	DBT	RBP1	TPM1	PDHB	PDIA4	SNRPA1	TOP1	HEXB	ICAM2	CORO1A	CD46	MAOA	COX5A	MAT2A	CSRP1	SERPINB3
COL4A2	LAMC1	PYGB	FBP1	CLTA	DBT	P4HA1	CTSH	TOP2A	CTSL	VCAN	GDI1	NME1	ACO1	LMNB1	PRKAR2B	FLNA	LMOD1
CYC1	MYH3	RALA	SPARC	CLTB	PYGB	TPT1	COX6C	G6PD	PFN1	ITGA4	MAT2A	NQO1	ZNF10	ITGAL	CPS1	MAOA	PML
PTPRC	ACP2	RALB	GSTM1	ANXA4	RALA	ALAD	TACSTD2	UBL4A	BPGM	EEF2	PRKAR2B	GNS	NT5E	ITGAX	SDC4	ACO1	SERPINA4
SNRPB2	MAP2	BCR	TPM1	CNP	RALB	F3	PARP1	PC	APRT	KRT5	CPS1	PHKG2	C5AR1	OGN	FMO3	ZNF10	EEF1D
MET	HSPA8	LAMP1	CLTA	DLD	BCR	HLA-E	POLA1	CYP2A6	EPRS1	PDIA4	FMO3	ARSB	MSR1	CAST	SLC6A4	NT5E	OAS2
MELTF	SLC2A1	ACADM	CLTB	HNRNPA1	LAMP1	LCP1	IFIT1	MTHFD1	CTSB	C6	AKT1	RPS2	VDAC1	IMPDH1	AKT1	GPD1	CRABP1
CFH	EPB41	TOP1	ANXA4	SNRPA1	ACADM	PLS3	UCHL1	EPX	HSP90AA1	P4HA1	AKT2	DSP	BGN	COL5A1	UQCRC1	C5AR1	MARCKS
SNRNP70	UMPS	TOP2A	INHBB	CTSH	FGFR1	APEH	LTA4H	SCGB1A1	GALT	ACP5	UQCRC1	RPA2	SDHB	PTMS	HIBADH	MSR1	AQP1
ITGA5	PDHB	G6PD	CNP	COX6C	TOP1	ETFA	ALDOC	IGF2R	HNRNPC	TPT1	HIBADH	MUC1	CD9	GSTM3	ATIC	VDAC1	GNA11
NFIC	DBT	UBL4A	HMOX1	TACSTD2	TOP2A	GYS1	C4A	ADH5	LAMB1	ALAD	ATIC	COX7C	BCKDHB	ATP6V1B2	HNRNPH3	BGN	ALDH4A1
VIM	PYGB	ESRRA	DLD	FGR	G6PD	PRKAR2A	C4B_2	CDK4	YES1	F3	HNRNPH3	TIMP2	COMT	ATP6V1C1	HNRNPH1	SDHB	ERP29
SERPINF2	PYGM	PC	HNRNPA1	PARP1	UBL4A	ANXA8	ATXN1L	PRPS2	LYN	PRG2	HNRNPH1	CD44	TGM2	CSRP1	YWHAB	CD9	PRDX6
RPS17	RALA	CYP19A1	SNRPA1	POLA1	ESRRA	GTF2F2	JMJD7	PABPC1	FH	HLA-E	YWHAB	NQO2	MMUT	FLNA	SFN	BCKDHB	BLVRB
KRT19	RALB	MTHFD1	CTSH	ALOX5	PC	MTHFD2	DERPC	PCNA	SFTPB	LCP1	SFN	SELP	OSBP	MAOA	STIP1	COMT	PRDX5
GNAI3	BCR	EPX	TACSTD2	UCHL1	DMD	MIF	SAA1	KRT3	ERCC1	PLS3	STIP1	ITGB4	PCMT1	ACO1	S100A11	TGM2	DDT
ANXA5	LAMP1	IGF2R	C1S	LTA4H	MTHFD1	CD99	POLR1D	COX6A1	THBS1	APEH	S100A11	CBR1	FBL	NT5E	PRDX2	MMUT	GCHFR
KRT16	ACADM	ADH5	PARP1	ALDOC	EPX	PRKCSH	TPRX2	HARS1	SP1	ETFA	INPP5B	ACADS	RPS4Y1	GPD1	ARRB2	OSBP	PRDX3
RPSA	TOP1	CDK4	POLA1	C4A	IGF2R	FDPS	RAP2A	COL6A1	IGF1R	TNNT1	PRDX2	CREB1	GART	EPHA1	DCTD	PCMT1	ATP5F1D
CD63	TOP2A	PRPS2	UCHL1	JMJD7	ADH5	COX7A2	RO60	COL6A2	ANXA6	GYS1	DCTD	PDGFRA	TNXB	C5AR1	GBP1	FBL	RPL12
MRPL3	G6PD	PABPC1	LTA4H	DERPC	CDK4	NID1	COX8A	COL6A3	NGFR	PRKAR2A	GBP1	GLB1	PAICS	VDAC1	GBP2	RPS4Y1	ECHS1
SNRPA	UBL4A	PCNA	ALDOC	POLR1D	PRPS2	AKR1A1	GAA	SLC25A4	SLC3A2	ANXA8	GBP2	PECAM1	SCP2	BGN	ELF1	GART	CMPK1
ENO2	ESRRA	COX6A1	C4A	TMEM276	PABPC1	PKM	RRAS	SLC25A6	GUSB	MTHFD2	STX2	PPP3CB	UBA1	SDHB	RPL9P9	TNXB	PEBP1
ACAA1	PC	HARS1	C4B_2	TPRX2	PCNA	ACYP2	HLA-C	IMPDH2	PFKM	CTSE	ICAM3	NCK1	GPX3	CD9	ACSL1	PAICS	PDIA3
GSTP1	CYP19A1	SLC25A4	TFPT	RAP2A	KRT3	HSP90B1	ARAF	TPR	HSP90AB1	SELL	RPL9P9	H1-5	NME2	BCKDHB	CDH5	IDS	PPP2R1A
MMP10	DMD	F5	ATXN1L	RO60	COX6A1	CCNB1	H1-4	CKB	SRPRA	MIF	ACSL1	EPCAM	FDXR	COMT	KIF5B	SCP2	FCER1G
LGALS1	MTHFD1	IMPDH2	JMJD7	GAA	HARS1	MYL6B	DLAT	ANXA3	ASNS	FOLR2	CDH5	POR	HNRNPA2B1	TGM2	CSTF2	UBA1	NMT1
QDPR	EPX	TPR	DERPC	RRAS	COL6A1	IDE	PTPRF	CKMT1B	HMBS	CD99	KIF5B	DPEP1	CBL	MMUT	LSP1	GPX3	HLA-F
HMGB1	SCGB1A1	PTHLH	POLR1D	HLA-C	COL6A2	POU2F1	NR2F6	BCKDHA	PDHA1	PRKCSH	CSTF2	MGMT	PRKACB	OSBP	DUT	FDXR	HMOX2
RBP1	IGF2R	CKB	RO60	ARAF	SLC25A4	HNRNPL	TXN	SKI	COL4A2	HCLS1	LSP1	ATP2A2	UQCRC2	PCMT1	ABCC1	HNRNPA2B1	ADSS2
GNAO1	ADH5	ANXA3	COX8A	H1-4	F5	DARS1	COX5B	ACTN1	CYC1	FDPS	DUT	CD36	SLC2A5	FBL	S100A3	RFX1	ADSL
SPARC	CDK4	CKMT1B	GAA	DLAT	IMPDH2	JUP	CTSA	CDH1	SNRPB2	CPM	GUCY1A2	PLCG2	CPN2	GART	GALNS	CALB2	PKLR
GSTM1	PRPS2	BCKDHA	AR	PTPRF	TPR	UQCRB	MGST1	SRC	MET	COX7A2	ABCC1	STMN1	FECH	TNXB	SDC2	CBL	CLIP1
TPM1	PABPC1	SKI	RRAS	TXN	CKB	BRAF	PRKAR1A	PEPD	CFH	NID1	KDELR2	YBX3	MMP8	PAICS	SHMT1	PRKACB	SRI
CLTA	PCNA	SKIL	HLA-C	COX5B	ANXA3	GLUL	UROS	XRCC6	SNRNP70	AKR1A1	MCM7	NAGA	MRC1	SCP2	SHMT2	UQCRC2	GSTT1
CLTB	COX6A1	ACTN1	ARAF	CTSA	CKMT1B	AKR1B1	ESD	XRCC5	NFIC	PKM	GALNS	HMGA1	CES1	UBA1	EVI2B	CPN2	SERPINB1
ANXA4	HARS1	CDH1	H1-4	MGST1	BCKDHA	ANPEP	HSPD1	UNG	VIM	ACYP2	SHMT1	GOT1	FBLN1	GPX3	EPHX2	FECH	ALDH1B1
CNP	COL6A1	SRC	SPP1	C7	SKI	PVR	CLU	COX4I1	SERPINF2	HSP90B1	EPHX2	PRKCA	TCEA1	NME2	HSPA1L	MMP8	POLR2B
HMOX1	COL6A2	PEPD	DLAT	PRKAR1A	ACTN1	GSPT1	HSPA5	LAMP2	RPS17	IDE	HSPA1L	ITGA2	PTGS1	ENPP1	HSPA4	MRC1	SDHA
DLD	COL6A3	XRCC6	PTPRF	ESD	ACE	IFNGR1	LAMC1	RNH1	KRT19	MMP9	HSPA4	SMPD1	ITGA6	FDXR	MPI	CES1	CORO1A
HNRNPA1	SLC25A4	XRCC5	NR2F6	HSPD1	CDH1	ARSA	MYH3	CYBA	KRT7	POU2F1	MPI	UBTF	SFPQ	HNRNPA2B1	PRSS3	FBLN1	GDI1
SNRPA1	SLC25A6	UNG	TXN	CLU	SRC	B4GALT1	ACP2	CYP4B1	GNAI3	HNRNPL	PFN2	NDUFB7	KEL	CALB2	GPC1	TCEA1	S100A7
CTSH	F5	COX4I1	TGFB3	HSPA5	PEPD	ACP3	MAP2	ITGA4	ANXA5	DARS1	CTNNA1	PRKACA	PPIB	PRKACB	PFN2	PTGS1	MAT2A
TACSTD2	IMPDH2	ALAS1	COX5B	LAMC1	XRCC6	EZR	HSPA8	EEF2	KRT16	IDO1	CTNNB1	CAPN2	ME2	UQCRC2	CTNNA1	ITGA6	HOXA9
FGR	TPR	IFI30	CTSA	MYH3	XRCC5	ATF2	SLC2A1	KRT10	RPSA	JUP	PHB1	DES	WARS1	SLC2A5	CTNNB1	SFPQ	PRKAR2B
PARP1	CKB	LAMP2	MGST1	ACP2	UNG	UCHL3	EPB41	KRT13	CD63	UQCRB	RDX	CEBPB	RPS3	CPN2	PHB1	PPIB	CPS1
POLA1	ANXA3	RNH1	MAPT	HSPA8	NR2C1	FOSL2	UMPS	KRT5	MRPL3	FABP4	RPA3	CTPS1	JAK1	FECH	RDX	ME2	FMO3
UCHL1	CKMT1B	BMP1	C7	SLC2A1	COX4I1	HPGD	PDHB	PDIA4	SNRPA	GLUL	SFTPD	ENG	PTPRE	MMP8	RPA3	WARS1	DNAJA1
FURIN	BCKDHA	EEF2	PRKAR1A	SLC2A3	ALAS1	CD46	DBT	P4HA1	ENO2	AKR1B1	RPL22	DDX5	SP100	MRC1	SFTPD	RPS3	AKT1
LTA4H	SKI	KRT10	ESD	EPB41	IFI30	NME1	PYGB	TPT1	ACAA1	ANPEP	SPR	PFKL	AHCY	CES1	RPL22	JAK1	UQCRC1
ALDOC	ACTN1	KRT13	HSPD1	UMPS	LAMP2	NQO1	CHRNB1	ALAD	GSTP1	PVR	SAA4	GM2A	CFL1	FBLN1	SPR	PTPRE	HIBADH
C4A	CDH1	KRT5	CLU	PDHB	RNH1	GNS	RALA	F3	LGALS1	CPN1	FBN1	LGALS3	EIF4B	TCEA1	KRT9	PTPRG	ATIC
TFPT	SRC	PDIA4	IRF1	DBT	CYBA	PHKG2	RALB	LCP1	QDPR	GSPT1	AGL	FLT1	ATP2B4	PTGS1	SAA4	SP100	HNRNPH3
LINC00869	PEPD	P4HA1	HSPA5	ITGAM	ATP1A3	HIVEP1	BCR	PLS3	HMGB1	IFNGR1	MYH9	PSMC3	DGKA	ITGA6	FBN1	AHCY	HNRNPH1
JMJD7	XRCC6	TPT1	LAMC1	PYGB	EEF2	ARSB	LAMP1	APEH	RBP1	ARSA	MYH10	TCP1	CPT2	SFPQ	AGL	CFL1	YWHAB
DERPC	XRCC5	ALAD	MYH3	PYGM	KRT10	RPS2	ACADM	ETFA	FBP1	B4GALT1	COPB2	PTPN1	DTYMK	PPIB	MYH9	EIF4B	SFN
POLR1D	UNG	F3	ACP2	RALA	PDIA4	DSP	TOP1	GYS1	SPARC	EZR	ACTN2	RPL35A	CMA1	ME2	MYH10	ATP2B4	STIP1
TMEM276	COX4I1	HLA-E	MAP2	RALB	P4HA1	RPA2	TOP2A	PRKAR2A	GSTM1	ATF2	SOAT1	ITGB5	LAMA2	WARS1	COPB2	DGKA	S100A11
RAP2A	ALAS1	LCP1	HSPA8	BCR	TPT1	MUC1	G6PD	ANXA8	TPM1	UCHL3	ADD1	ARF4	FCAR	RPS3	ACTN2	CPT2	PRDX2
RO60	IFI30	PLS3	SLC2A1	LAMP1	ALAD	COX7C	UBL4A	GTF2F2	CLTA	FOSL2	ADD2	RPL7	PRTN3	JAK1	ADD1	DTYMK	ARRB2
GAA	LAMP2	APEH	SLC2A3	ACADM	F3	CD44	ESRRA	MTHFD2	CLTB	VAV1	BSG	VCL	COX7A1	PTPRE	ADD2	CMA1	GBP1
RRAS	RNH1	ETFA	EPB41	TOP1	HLA-E	NQO2	PC	MIF	ANXA4	CSF2RA	TIMP3	GPX2	KDELR1	PTPRG	BSG	LAMA2	GBP2
HLA-C	CYBA	GYS1	UMPS	TOP2A	LCP1	PFKFB1	CYP2A6	PRKCSH	CNP	CD46	FUS	LBP	EEF1B2	SP100	TIMP3	FCAR	ICAM3
ARAF	EEF2	PRKAR2A	PDHB	G6PD	PLS3	ITGB4	CYP19A1	FDPS	DLD	NME1	NUP214	PTPRA	ATP5PB	AHCY	NUP214	PRTN3	RPL9P9
H1-4	KRT10	ANXA8	DBT	UBL4A	APEH	CBR1	DMD	COX7A2	HNRNPA1	NQO1	DEK	NAT1	TBXAS1	CFL1	DEK	COX7A1	ACSL1
DLAT	KRT13	ENO3	ITGAM	ESRRA	ETFA	ACADS	MTHFD1	NID1	SNRPA1	GNS	MYH11	SON	ACP1	ATP2B4	MYH11	KDELR1	CDH5
SAG	KRT5	GTF2F2	PYGB	PC	GYS1	CREB1	EPX	AKR1A1	CTSH	PHKG2	PPM1A	NELFE	PRKCH	CPT2	PPM1A	EEF1B2	KIF5B
PTPRF	PDIA4	MTHFD2	PYGM	DMD	PRKAR2A	GLB1	SCGB1A1	PKM	COX6C	ARSB	IGFALS	RPL17	ACAT1	DTYMK	KRT2	ATP5PB	CSTF2
TXN	P4HA1	MIF	RALA	MTHFD1	GTF2F2	PPP3CB	IGF2R	ACYP2	TACSTD2	RPS2	KRT2	PGAM1	TNC	RRM1	HMGCL	TBXAS1	LSP1
COX5B	TPT1	CD99	RALB	EPX	MTHFD2	NCK1	ADH5	HSP90B1	PARP1	DSP	HMGCL	RCC1	MYL9	FCAR	PSMC2	ACP1	DUT
CTSA	ALAD	PRKCSH	BCR	IGF2R	MIF	GCFC2	CDK4	CCNB1	POLA1	RPA2	PSMC2	SDC1	POLR2A	PRTN3	CHI3L1	ACAT1	S100A3
MGST1	F3	HCLS1	LAMP1	ADH5	PRKCSH	H1-5	PRPS2	MYL6B	UCHL1	MUC1	GGT5	LIG1	CDK2	MMP11	GGT5	TNC	MAN1A1
PRKAR1A	HLA-E	FDPS	ERG	CDK4	FDPS	H1-3	PABPC1	IDE	LTA4H	COX7C	ARL2	ATP5PF	MCM3	KDELR1	ARL3	MYL9	GALNS
ESD	LCP1	TRIM27	ACADM	PRPS2	TRIM27	EPCAM	PCNA	POU2F1	ALDOC	TIMP2	ARL3	PLCG1	AZGP1	EEF1B2	MAP2K2	POLR2A	SDC2
HSPD1	PLS3	COX7A2	TOP1	PABPC1	COX7A2	POR	COX6A1	HNRNPL	C4A	ALOX15	MAP2K2	UGT1A6	MPST	ATP5PB	ATP5F1C	CDK2	SHMT1
CLU	APEH	NID1	TOP2A	PCNA	NID1	ATP2A2	HARS1	DARS1	TFPT	CD44	ATP5F1C	CD58	RPS12	TBXAS1	ATP6V1E1	AZGP1	EPHX2
HSPA5	ETFA	AKR1A1	G6PD	COX6A1	AKR1A1	FAH	COL6A1	JUP	ATXN1L	NQO2	ATP6V1E1	VCAM1	FAS	IGFBP5	CPOX	MPST	HSPA1L
LAMC1	GYS1	PKM	UBL4A	HARS1	PKM	STMN1	COL6A2	UQCRB	LINC00869	ITGB4	CPOX	NCL	DNAJB1	ACP1	RPL4	RPS12	HSPA4
MYH3	PRKAR2A	ACYP2	ESRRA	COL6A1	HSP90B1	YBX3	SLC25A4	GLUL	JMJD7	CBR1	RPL4	HK1	ATP5F1A	ACAT1	NUDT1	FAS	MPI
ACP2	ANXA8	HSP90B1	PC	COL6A2	CCNB1	ZNF24	SLC25A6	AKR1B1	POLR2M	ANK1	LONP1	POLR2C	CTSS	TNC	LONP1	YY1	PFN2
HSPA8	GTF2F2	CCNB1	MTHFD1	COL6A3	MYL6B	ZKSCAN1	F5	ANPEP	DERPC	ACADS	PGM1	POLR2E	PSMA1	MYL9	PGM1	DNAJB1	CTNNA1
SLC2A1	MTHFD2	MYL6B	EPX	SLC25A4	IDE	NAGA	IMPDH2	PVR	POLR1D	CREB1	PPP1CC	NDUFV2	PSMA2	POLR2A	PPP1CC	ATP5F1A	CTNNB1
SLC2A3	MIF	IDE	IGF2R	SLC25A6	POU2F1	HMGA1	TPR	GSPT1	RAP2A	GLB1	SERPINF1	TRIM21	PSMA3	CDK2	POLR2I	CTSS	PHB1
EPB41	CD99	POU2F1	ADH5	F5	HNRNPL	TMEM11	CKB	IFNGR1	RO60	PECAM1	DLST	TFEB	PSMA4	COL8A2	SERPINF1	PSMA1	RDX
UMPS	PRKCSH	HNRNPL	CDK4	IMPDH2	DARS1	GOT1	ANXA3	ARSA	COX8A	PPP3CB	GPX4	EIF2AK2	S100P	MCM3	DLST	PSMA2	RPA3
PDHB	FDPS	DARS1	PRPS2	TPR	JUP	PRKCA	CKMT1B	B4GALT1	GAA	NCK1	SRP14	SRM	ITGA3	AZGP1	GPX4	PSMA3	SFTPD
DBT	COX7A2	JUP	PABPC1	PTHLH	UQCRB	ITGA2	BCKDHA	ACP3	RRAS	GCFC2	NUP62	SLC9A1	PTX3	MPST	SRP14	PSMA4	RPL22
ITGAM	NID1	UQCRB	PCNA	CKB	GLUL	GJA1	ACTN1	EZR	HLA-C	H1-5	HPCAL1	ORM2	MSN	LAMA1	TGFBR2	S100P	SPR
PYGB	AKR1A1	GLUL	COX6A1	ANXA3	AKR1B1	SMPD1	CDH1	ATF2	ARAF	EPCAM	TAGLN2	CSNK2A2	DDX6	RPS12	NUP62	ITGA3	SAA4
PYGM	PKM	AKR1B1	HARS1	CKMT1B	PVR	UBTF	SRC	UCHL3	H1-4	POR	TALDO1	ITIH2	U2AF2	DNAJB1	HPCAL1	PTX3	FBN1
RALA	ACYP2	PVR	COL6A1	BCKDHA	CPN1	NDUFB7	PEPD	FOSL2	DLAT	EPB42	SNCA	ITIH1	RPL13	ATP5F1A	TAGLN2	MSN	AGL
RALB	HSP90B1	CPN1	COL6A2	SKI	GSPT1	PRKACA	XRCC6	HPGD	PTPRF	ATP2A2	ETFB	NFKB1	IVD	CTSS	TALDO1	DDX6	MYH9
BCR	CCNB1	GSPT1	COL6A3	ACTN1	IFNGR1	CAPN2	XRCC5	VAV1	NR2F6	PLCG2	LIPA	NCF2	S100A4	PSMA1	SNCA	U2AF2	MYH10
LAMP1	MYL6B	IFNGR1	SLC25A4	ACE	ARSA	CEBPB	UNG	CD46	TXN	STMN1	ATP6V1A	TYMP	MGAT1	PSMA2	ETFB	RPL13	COPB2
ACADM	IDE	ARSA	F5	CDH1	B4GALT1	PTPN2	COX4I1	NME1	COX5B	YBX3	HSPA9	ATP2B1	HMGB2	PSMA3	LIPA	IVD	ACTN2
TOP1	POU2F1	ACP3	IMPDH2	MYH7	EZR	CTPS1	IFI30	NQO1	CTSA	ZSCAN20	EIF4A3	HLA-DPA1	PTBP1	PSMA4	ATP6V1A	MGAT1	ADD1
TOP2A	HNRNPL	EZR	TPR	SRC	ATF2	DDX5	LAMP2	GNS	MGST1	NAGA	RPS19	EIF2S2	TARS1	S100P	HSPA9	HMGB2	ADD2
G6PD	DARS1	ATF2	PIP	PEPD	UCHL3	PFKL	RNH1	PHKG2	PRKAR1A	RHOQ	RPL3	ANXA7	VARS1	ITGA3	EIF4A3	PTBP1	BSG
UBL4A	JUP	UCHL3	CKB	XRCC6	FOSL2	GM2A	CYBA	ARSB	UROS	HMGA1	COL15A1	SDS	EEF1G	ITGB8	RPL3	TARS1	TIMP3
ESRRA	UQCRB	FOSL2	ANXA3	XRCC5	CD46	LGALS3	CYP4B1	RPS2	ESD	GOT1	COL18A1	CD33	FKBP2	PTX3	COL15A1	VARS1	NUP214
PC	GLUL	CD46	CKMT1B	UNG	NME1	PSMC3	ITGA4	DSP	HSPD1	BPI	DDOST	TBP	STOM	MSN	COL18A1	EEF1G	MYH11
CYP19A1	AKR1B1	NME1	BCKDHA	COX4I1	NQO1	TCP1	RARG	RPA2	CLU	PRKCA	CAPG	CCNA2	PON1	DDX6	DDOST	FKBP2	GLRX
DMD	PVR	NQO1	ACTN1	ALAS1	GNS	PTPN1	ATP1A3	MUC1	HSPA5	JUNB	CAP2	RAB3B	MAOB	U2AF2	FEN1	STOM	PPM1A
MTHFD1	CPN1	GNS	CDH1	LAMP2	PHKG2	IGFBP2	EEF2	COX7C	LAMC1	ITGA2	IL6ST	RAB5A	YWHAQ	RPL13	MMP12	PON1	IGFALS
EPX	GSPT1	PHKG2	SRC	RNH1	RPS2	ERCC2	KRT10	ALOX15	ACP2	SMPD1	CCT6A	RAB6A	MAPK3	IVD	CAPG	MAOB	HMGCL
IGF2R	IFNGR1	ARSB	XRCC6	BMP1	DSP	RPL35A	KRT13	CD44	MAP2	UBTF	NNMT	MX1	RPL10	S100A4	IL6ST	YWHAQ	PSMC2
ADH5	ARSA	RPS2	XRCC5	MYH8	RPA2	ITGB5	KRT5	NQO2	HSPA8	ATF7	PSMB10	MX2	COL8A1	MGAT1	CCT6A	MAPK3	CHI3L1
CDK4	B4GALT1	TCF3	UNG	ICAM2	MUC1	ARF4	PDIA4	ITGB4	SLC2A1	NDUFB7	ARL1	PSMB1	RPA1	HMGB2	NNMT	MARK3	GGT5
PRPS2	EZR	DSP	COX4I1	EEF2	COX7C	RPL7	P4HA1	CBR1	EPB41	PRKACA	STAT3	M6PR	APEX1	PTBP1	PSMB10	RPL10	ARL2
PABPC1	ATF2	RPA2	ALAS1	KRT10	ALOX15	VCL	TPT1	ACADS	UMPS	CAPN2	MDH1	COX5A	CD82	TARS1	ARL1	COL8A1	ARL3
PCNA	UCHL3	COX7C	IFI30	KRT5	CD44	GPX2	ALAD	CREB1	PDHB	DES	MDH2	LMNB1	DCK	VARS1	STAT3	RPA1	MAP2K2
COX6A1	FOSL2	CD44	LAMP2	PDIA4	ITGB4	PTPRA	F3	SLC25A16	DBT	CEBPB	HADHA	ITGAL	CAD	EEF1G	PEX19	APEX1	ATP5F1C
HARS1	CD46	ITGB4	RNH1	P4HA1	CBR1	NAT1	HLA-E	GLB1	PYGB	CTPS1	EIF2S3	ITGAX	CALR	FKBP2	MDH1	CD82	ATP6V1E1
COL6A1	NME1	CBR1	CYBA	TPT1	ACADS	IL1RN	LCP1	PPP3CB	PYGM	ENG	CETN2	GZMH	MAP4	STOM	MDH2	DCK	CPOX
COL6A2	NQO1	ACADS	NCAM1	ALAD	CREB1	SON	PLS3	NCK1	MBL2	DDX5	MNDA	PZP	CANX	PON1	HADHA	CAD	RPL4
COL6A3	GNS	CREB1	EEF2	F3	SLC25A16	NELFE	APEH	GCFC2	RALA	PFKL	PTGDS	OGN	PIK3R1	MAOB	CETN2	CALR	LONP1
SLC25A4	PHKG2	GLB1	KRT10	HLA-E	GLB1	RPL17	ETFA	H1-5	RALB	CR1	UBA7	CAST	PSMB8	YWHAQ	MNDA	MAP4	PGM1
SLC25A6	ARSB	PPP3CB	KRT13	LCP1	PPP3CB	PGAM1	GYS1	H1-3	BCR	LGALS3	NAA10	IMPDH1	PSMB9	MAPK3	PTGDS	CANX	PPP1CC
F5	RPS2	NCK1	KRT5	PLS3	NCK1	RCC1	PRKAR2A	EPCAM	LAMP1	FLT1	CSK	COL5A1	PSMA5	RPL10	UBA7	PSMB8	GNL1
IMPDH2	DSP	GCFC2	PDIA4	APEH	GCFC2	SDC1	ANXA8	POR	ACADM	PSMC3	GARS1	RASA1	HLA-DMA	COL8A1	NAA10	PSMB9	POLR2I
TPR	RPA2	H1-3	P4HA1	ETFA	H1-5	LIG1	GTF2F2	ABO	TOP1	TCP1	IARS1	PTMS	HLA-DMB	RPA1	PPP1R2	PSMA5	SERPINF1
PTHLH	COX7C	EPCAM	TPT1	GYS1	H1-3	ATP5PF	MTHFD2	MGMT	TOP2A	PTPN1	ACTR1B	PRPS1L1	PSMB4	APEX1	CSK	HLA-DMB	DLST
CKB	ALOX15	POR	ALAD	PRKAR2A	H1-2	XRCC1	CTSE	FER	G6PD	ERCC2	ECI1	GSTM3	PSMB6	CD82	GARS1	PSMB4	GMPR
ANXA3	CD44	ATP2A2	F3	ENO3	EPCAM	KRT15	CD99	ATP2A2	UBL4A	RPL35A	TMPO	ATP6V1B2	PSMB5	DCK	IARS1	PSMB6	GPX4
CKMT1B	ITGB4	PLCG2	LCP1	GTF2F2	POR	KRT4	PRKCSH	FAH	ESRRA	ITGB5	STAT1	ATP6V1C1	GSTM2	CAD	ACTR1B	PSMB5	SRP14
BCKDHA	CBR1	FAH	PLS3	YJU2B	ATP2A2	PAM	FDPS	STMN1	PC	ARF4	STAT6	CSRP1	ABCD3	CALR	ECI1	GSTM2	TGFBR2
SKI	ANK1	STMN1	APEH	MTHFD2	PLCG2	CDH2	COX7A2	YBX3	CYP19A1	RPL7	MTREX	FLNA	TMOD1	MAP4	TMPO	ABCD3	NUP62
ACTN1	ACADS	YBX3	ETFA	MIF	FAH	PLCG1	NID1	ZKSCAN1	DMD	VCL	AKR1C3	MAOA	NDUFS1	CANX	STAT1	TMOD1	HPCAL1
ACE	CREB1	ZKSCAN1	GYS1	CD99	STMN1	UGT1A6	AKR1A1	NAGA	MTHFD1	LBP	ARHGAP25	ACO1	MAPK1	PSMB8	STAT6	ITPRID2	TAGLN2
CDH1	GLB1	NAGA	PRKAR2A	PRKCSH	YBX3	CD58	PKM	HMGA1	EPX	PTPRA	PI4KA	S1PR1	GCA	PSMB9	STAT5A	ACADL	TALDO1
MYH7	PPP3CB	HMGA1	ENO3	FDPS	ZNF24	NCL	ACYP2	GOT1	SCGB1A1	IL1RN	EPS15	ZNF10	LAP3	PSMA5	AKR1C3	NDUFS1	SNCA
SRC	NCK1	TMEM11	GTF2F2	TRIM27	ZKSCAN1	HK1	HSP90B1	PRKCA	IGF2R	ITGB6	LRPPRC	NT5E	CD34	HLA-DMA	ARHGAP25	MAPK1	ETFB
PEPD	GCFC2	GOT1	YJU2B	CPM	NAGA	POLR2C	MYL6B	JUNB	ADH5	SON	ACAA2	C5AR1	CD38	HLA-DMB	MTOR	GCA	LIPA
XRCC6	EPCAM	PRKCA	MTHFD2	COX7A2	HMGA1	POLR2E	SNRPB	ITGA2	CDK4	NELFE	RPL35	MSR1	GTF2E2	PSMB4	PI4KA	LAP3	ATP6V1A
XRCC5	POR	JUNB	MIF	NID1	TMEM11	NDUFV2	IDE	SMPD1	PRPS2	RPL17	WAS	VDAC1	TPP2	PSMB6	EPS15	CD34	HSPA9
UNG	MGMT	ITGA2	CD99	AKR1A1	GOT1	ERCC3	POU2F1	UBTF	PABPC1	PGAM1	PRCP	BGN	IMPA1	PSMB5	CASP3	PCSK1	EIF4A3
COX4I1	ATP2A2	GJA1	PRKCSH	PKM	PRKCA	TRIM21	HNRNPL	JUND	PCNA	RCC1	HTT	SDHB	PTPN6	GSTM2	RPS27	TPP2	RPS19
ALAS1	PLCG2	UBTF	FDPS	ACYP2	ITGA2	EIF2AK2	DARS1	NDUFB7	COX6A1	SDC1	ECE1	CD9	CRABP2	ABCD3	LIFR	IMPA1	RPL3
LAMP2	FAH	JUND	TRIM27	HSP90B1	UBTF	SRM	JUP	PRKACA	HARS1	LIG1	SLC1A1	BCKDHB	TKT	LOX	LRPPRC	PTPN6	COL15A1
RNH1	STMN1	NDUFB7	COX7A2	CCNB1	ATF7	SLC9A1	UQCRB	CAPN2	COL6A2	ATP5PF	PAFAH1B1	COMT	CASP1	NDUFS1	ACAA2	SHC1	COL18A1
BMP1	YBX3	PRKACA	NID1	MYL6B	NDUFB7	CSNK2A2	GLUL	CEBPB	SLC25A4	PAM	MCAM	TGM2	LMOD1	POLD1	RPL35	CRABP2	DDOST
ICAM2	ZKSCAN1	CAPN2	AKR1A1	IDE	PRKACA	RXRA	AKR1B1	PTPN2	SLC25A6	PLCG1	CRAT	MMUT	PML	MAPK1	PRCP	TKT	FEN1
EEF2	NAGA	CEBPB	PKM	POU2F1	CAPN2	ITIH2	ANPEP	CTPS1	F5	CD58	MATR3	OSBP	EEF1D	GCA	HTT	CASP1	MMP12
KRT10	HMGA1	PTPN2	ACYP2	HNRNPL	CEBPB	NFKB1	PVR	DDX5	IMPDH2	VCAM1	GPD2	PCMT1	OAS2	LAP3	ECE1	NOS3	CAPG
KRT5	TMEM11	CTPS1	HSP90B1	DARS1	PTPN2	TYMP	GSPT1	PFKL	TPR	NCL	SSR1	FBL	MARCKS	TPP2	MTHFR	LMOD1	IL6ST
PDIA4	GOT1	DDX5	CCNB1	ETS1	CTPS1	ATP2B1	IFNGR1	GM2A	CKB	HK1	ALDH3B1	GART	AQP1	IMPA1	SLC1A1	PML	TXLNA
P4HA1	PRKCA	PFKL	MYL6B	JUP	DDX5	EIF2S2	ARSA	LGALS3	ANXA3	POLR2C	SYK	TNXB	GNA11	EPHB2	PAFAH1B1	EEF1D	CCT6A
TPT1	ITGA2	GM2A	SNRPB	UQCRB	PFKL	ANXA7	B4GALT1	PSMC3	CKMT1B	POLR2E	RANBP1	PAICS	ALDH4A1	PTPN6	MCAM	OAS2	NNMT
ALAD	UBTF	LGALS3	IDE	ETS2	LGALS3	TBP	ACP3	TCP1	BMP3	NDUFV2	NAMPT	IDS	ERP29	CRABP2	CRAT	MARCKS	PSMB10
F3	JUND	PSMC3	POU2F1	BRAF	IGFBP3	BTF3	EZR	PTPN1	BCKDHA	TRIM21	AFM	SCP2	PRDX6	TKT	MATR3	AQP1	ARL1
HLA-E	NDUFB7	TCP1	HNRNPL	GLUL	PSMC3	RAB3A	ATP6V1B1	IGFBP2	SKI	EIF2AK2	PSMC4	UBA1	BLVRB	CASP1	GPD2	GNA11	STAT3
LCP1	PRKACA	PTPN1	DARS1	AKR1B1	TCP1	RAB4A	ATF2	ERCC2	ACTN1	SRM	TSFM	GPX3	PRDX5	LMOD1	SSR1	ALDH4A1	PEX19
PLS3	CAPN2	ERCC2	JUP	ANPEP	PTPN1	RAB5A	UCHL3	RPL35A	CDH1	SLC9A1	ASPA	NME2	DDT	PML	ALDH3B1	ERP29	MDH1
APEH	CEBPB	BMP7	UQCRB	PVR	IGFBP2	RAB6A	HPGD	ITGB5	SRC	ORM2	VDAC2	FDXR	GCHFR	SERPINA4	RANBP1	PRDX6	MDH2
ETFA	PTPN2	RPL35A	BRAF	CPN1	ERCC2	MSH3	CD46	ARF4	PEPD	CSNK2A2	USP5	HNRNPA2B1	PRDX3	EEF1D	NAMPT	BLVRB	HADHA
GYS1	AMD1	ITGB5	GLUL	GSPT1	RPL35A	PSMB1	NME1	RPL7	XRCC6	ITIH2	MAPK9	CALB2	ATP5F1D	OAS2	AFM	PRDX5	EIF2S3
PRKAR2A	CTPS1	ARF4	AKR1B1	IFNGR1	ITGB5	M6PR	NQO1	VCL	XRCC5	ITIH1	MAP2K4	PRKACB	RPL12	MARCKS	PSMC4	DDT	CETN2
ANXA8	DDX5	RPL7	ANPEP	ARSA	ARF4	COX5A	GNS	GPX2	UNG	NFKB1	RANGAP1	UQCRC2	ECHS1	GNA11	ASPA	PRDX3	MNDA
ENO3	PFKL	EGR1	PVR	B4GALT1	RPL7	LMNB1	PHKG2	PTPRA	COX4I1	NCF2	RECQL	SLC2A5	CMPK1	ALDH4A1	VDAC2	ATP5F1D	PTGDS
GTF2F2	LGALS3	VCL	CPN1	EZR	VCL	DDC	ARSB	NAT1	ALAS1	TYMP	CRK	CPN2	PEBP1	PBLD	ACADSB	RPL12	UBA7
YJU2B	PSMC3	GPX2	GSPT1	UCHL3	GPX2	CAST	RPS2	IL1RN	IFI30	ATP2B1	CRKL	FECH	PDIA3	ERP29	USP5	ECHS1	CSK
MTHFD2	TCP1	PTPRA	IFNGR1	FOSL2	PTPRA	IMPDH1	ST6GAL1	ITGB6	LAMP2	HLA-DPA1	GSTM5	MRC1	PPP2R1A	PRDX6	MAPK9	CMPK1	GARS1
MIF	PTPN1	NAT1	ARSA	CSF2RA	NAT1	RASA1	DSP	SON	RNH1	EIF2S2	NSF	CES1	CDC27	BLVRB	RANGAP1	PEBP1	IARS1
CD99	IGFBP2	IL1RN	B4GALT1	CD46	SON	PTMS	RPA2	NELFE	CYBA	TCN1	CDKN1B	FBLN1	FCER1G	PRDX5	RECQL	PDIA3	ACTR1B
PRKCSH	ERCC2	SON	ACP3	NME1	NELFE	CDK11B	MUC1	RPL17	CYP4B1	ANXA7	MAP2K3	TCEA1	NMT1	DDT	CRK	PPP2R1A	ECI1
FDPS	RPL35A	NELFE	EZR	NQO1	RPL17	FUT3	COX7C	PGAM1	ITGA4	TBP	BRCC3	PTGS1	HMOX2	GCHFR	CRKL	PPP2R1B	TMPO
TRIM27	ITGB5	RPL17	ATP6V1B1	GNS	PGAM1	GSTM3	ALOX15	RCC1	RARG	RAB4A	RPL27A	ITGA6	ADSS2	PRDX3	BAG6	CDC27	STAT1
CPM	ARF4	PGAM1	ATF2	PHKG2	RCC1	ATP6V1B2	CD44	SDC1	EEF2	RAB5A	RPL5	SFPQ	LRPAP1	ATP5F1D	GSTM5	FCER1G	STAT6
COX7A2	RPL7	RCC1	UCHL3	ARSB	SDC1	ATP6V1C1	NQO2	LIG1	KRT10	RAB6A	RPL21	PPIB	ADSL	RPL12	NSF	NMT1	STAT5A
NID1	VCL	SDC1	FOSL2	RPS2	ATF6	CSRP1	ITGB4	ATP5PF	KRT13	MSH3	RPL28	ME2	PKLR	ECHS1	CDKN1B	HLA-F	AKR1C3
AKR1A1	GPX2	LIG1	HPGD	DSP	LIG1	FLNA	CBR1	XRCC1	KRT5	MX1	RPS9	WARS1	CLIP1	CMPK1	MAP2K3	HMOX2	ARHGAP25
PKM	PTPRA	ATP5PF	CD46	RPA2	ATP5PF	NF1	ACADS	KRT15	PDIA4	MX2	RPS5	RPS3	SRI	PEBP1	BRCC3	ADSS2	MTOR
HSP90B1	NAT1	XRCC1	NME1	COX7C	XRCC1	MAOA	CREB1	KRT4	P4HA1	PSMB1	RPS10	JAK1	GNA15	PDIA3	RPL27A	AXL	PI4KA
CCNB1	ITGB6	KRT15	NQO1	CD44	KRT15	ACO1	SLC25A16	PAM	TPT1	M6PR	GNPDA1	PTPRE	GSTT1	PPP2R1A	RPL5	LRPAP1	EPS15
MYL6B	SON	KRT4	GNS	NQO2	KRT4	ABCB4	GLB1	TSPAN8	ALAD	COX5A	NEDD4	PTPRZ1	SERPINB1	CDC27	RPL21	ADSL	LRPPRC
IDE	NELFE	PAM	PHKG2	ITGB4	TSPAN8	KITLG	PPP3CB	PLCG1	F3	LMNB1	YAP1	SP100	ALDH1B1	FCER1G	RPL28	PKLR	ACAA2
MMP9	RPL17	PLCG1	RPS2	CBR1	PLCG1	VDAC1	NCK1	UGT1A6	LCP1	ITGAL	UTRN	TNFSF4	ALDH3A1	NMT1	RPS9	CLIP1	RPL35
POU2F1	PGAM1	UGT1A6	ST6GAL1	ANK1	UGT1A6	ERBB3	GCFC2	CD58	PLS3	ITGAX	IQGAP1	AHCY	POLR2B	HLA-F	RPS5	SRI	WAS
HNRNPL	RCC1	CD58	DSP	ACADS	CD58	SDHB	H1-5	NCL	APEH	PZP	STT3A	CFL1	SDHA	HMOX2	RPS10	GSTT1	PRCP
DARS1	SDC1	NCL	RPA2	CREB1	NCL	CD9	EPCAM	HK1	ETFA	OGN	CAPZA2	EIF4B	CORO1A	ADSS2	MAP1B	SERPINB1	HTT
JUP	LIG1	HK1	MUC1	SLC25A16	HK1	BCKDHB	POR	POLR2C	GYS1	CAST	CAPZB	ATP2B4	GDI1	AXL	GNPDA1	ALDH1B1	ECE1
UQCRB	ATP5PF	POLR2C	COX7C	GLB1	POLR2C	COMT	MGMT	POLR2E	PRKAR2A	IMPDH1	QARS1	DGKA	MAT2A	LRPAP1	NEDD4	POLR2B	PAFAH1B1
ETS2	XRCC1	POLR2E	CD44	PPP3CB	POLR2E	TGM2	FER	NDUFV2	ANXA8	COL5A1	UQCRFS1	CPT2	PRKAR2B	ADSL	YAP1	SDHA	MCAM
BRAF	KRT15	NDUFV2	NQO2	NCK1	NDUFV2	MMUT	ATP2A2	ERCC3	GTF2F2	RASA1	ATP5PO	DTYMK	CPS1	PKLR	UTRN	CORO1A	CRAT
GLUL	KRT4	ERCC3	ITGB4	GCFC2	ERCC3	OSBP	FAH	TRIM21	MTHFD2	PRPS1L1	LIMS1	RRM1	FMO3	CLIP1	IQGAP1	GDI1	MATR3
AKR1B1	CDH2	TRIM21	CBR1	H1-5	TRIM21	PCMT1	STMN1	EIF2AK2	MIF	GSTM3	PREP	CMA1	DNAJA1	SRI	GYG1	MAT2A	GRK6
ANPEP	PLCG1	EIF2AK2	ANK1	POR	EIF2AK2	FBL	YBX3	SRM	CD99	ATP6V1B2	ME1	LAMA2	AKT1	GSTT1	STT3A	PRKAR2B	GPD2
PVR	UGT1A6	SRM	ACADS	MGMT	SRM	RPS4Y1	ZNF24	SLC9A1	PRKCSH	ATP6V1C1	IREB2	COX7A1	AKT2	SERPINB1	CAPZA2	SDC4	SSR1
CPN1	CD58	SLC9A1	CREB1	FER	SLC9A1	GART	ZKSCAN1	CSNK2A2	IRF2	CSRP1	PIP4K2A	KDELR1	UQCRC1	ALDH1B1	CAPZB	TIA1	ALDH3B1
GSPT1	NCL	CSNK2A2	SLC25A16	ATP2A2	CSNK2A2	CDH3	NAGA	RXRA	FDPS	FLNA	ARCN1	EEF1B2	HIBADH	POLR2B	QARS1	FMO3	PTPN9
IFNGR1	HK1	RXRA	GLB1	CPE	RXRA	PAICS	HMGA1	ITIH2	COX7A2	MAOA	LSS	ATP5PB	ATIC	NTS	UQCRFS1	SLC6A6	SYK
ARSA	POLR2C	CEL	PPP3CB	PLCG2	AOC1	IDS	TMEM11	NFKB1	NID1	ACO1	GCLC	TBXAS1	HNRNPH3	SDHA	ATP5PO	DNAJA1	RANBP1
B4GALT1	POLR2E	NFKB1	NCK1	FAH	ITIH2	SCP2	GOT1	TYMP	AKR1A1	ZNF10	GCLM	ACP1	HNRNPH1	CORO1A	LIMS1	AKT1	NAMPT
EZR	NDUFV2	TYMP	GCFC2	STMN1	NFKB1	UBA1	PRKCA	ATP2B1	PKM	TNFAIP3	TRAPPC10	ACAT1	YWHAB	GDI1	CXCL12	AKT2	AFM
ATF2	ERCC3	ATP2B1	H1-5	YBX3	TYMP	NME2	JUNB	EIF2S2	ACYP2	NT5E	PSMD8	TNC	SFN	MAT2A	PREP	UQCRC1	PSMC4
UCHL3	EIF2AK2	EIF2S2	EPCAM	ZKSCAN1	ATP2B1	FDXR	ITGA2	ANXA7	HSP90B1	MSR1	GSS	MYL9	STIP1	CPS1	ME1	HIBADH	VDAC2
FOSL1	SRM	ANXA7	POR	NAGA	EIF2S2	HNRNPA2B1	SMPD1	TBP	CCNB1	VDAC1	CCT5	POLR2A	S100A11	RRM2	PIP4K2A	ATIC	ACADSB
FOSL2	SLC9A1	TBP	ATP2A2	HMGA1	ANXA7	RFX1	UBTF	BTF3	MYL6B	BGN	PTDSS1	CDK2	PRDX2	SDC4	ARCN1	HNRNPH3	CBX5
CSF2RA	CSNK2A2	CCNA2	CD36	TMEM11	CCNA2	CBL	JUND	RAB3A	IDE	SDHB	NES	GRK2	ARRB2	TIA1	LSS	HNRNPH1	USP5
CD46	RXRA	BTF3	CPE	GOT1	BTF3	PRKACB	NDUFB7	RAB4A	POU2F1	CD9	HSPA13	MCM3	DCTD	FMO3	GCLC	YWHAB	MAPK9
NME1	ITIH2	RAB3A	PLCG2	IFNAR1	RAB3A	UQCRC2	PRKACA	RAB5A	HNRNPL	BCKDHB	IDH2	AZGP1	GBP1	DNAJA1	GCLM	SFN	MAP2K4
NQO1	CEL	RAB3B	FAH	PRKCA	RAB3B	FECH	CAPN2	RAB6A	DARS1	COMT	PITPNB	MPST	GBP2	AKT1	PSMD8	STIP1	RANGAP1
GNS	NFKB1	RAB4A	STMN1	JUNB	RAB4A	CES1	DES	MSH3	JUP	TGM2	ADGRE5	RPS12	ELF1	AKT2	GSS	S100A11	RECQL
PHKG2	TYMP	RAB5A	YBX3	ITGA2	RAB5A	FBLN1	CEBPB	PSMB1	UQCRB	MMUT	MARCKSL1	DNAJB1	RPL9P9	UQCRC1	CCT5	PRDX2	NOP2
ARSB	ATP2B1	RAB6A	ZNF24	GJA1	RAB6A	TCEA1	PTPN2	M6PR	ETS2	OSBP	PXN	DNAJB2	ACSL1	HIBADH	SLC1A6	ARRB2	CRK
RPS2	EIF2S2	MSH3	ZKSCAN1	SMPD1	MSH3	ITGA6	CTPS1	COX5A	GLUL	PCMT1	ALDH9A1	ATP5F1A	CDH5	ATIC	NES	DCTD	CRKL
DSP	ANXA7	MX1	NAGA	UBTF	PSMB1	SFPQ	DDX5	LMNB1	AKR1B1	FBL	RPL34	CTSS	KIF5B	HNRNPH3	IDH2	SLC8A1	NSF
RPA2	TBP	PSMB1	HMGA1	JUND	M6PR	TUBG1	PFKL	OGN	ANPEP	RPS4Y1	RPIA	PSMA1	CSTF2	HNRNPH1	PITPNB	GBP1	CDKN1B
COX7C	CCNA2	M6PR	TMEM11	NDUFB7	COX5A	PPIB	GM2A	CAST	PVR	GART	LMAN1	PSMA2	LSP1	YWHAB	ADGRE5	GBP2	MAP2K3
NPR1	BTF3	COX5A	GOT1	PRKACA	LMNB1	ME2	LGALS3	IMPDH1	CPN1	CDH3	NASP	PSMA3	DUT	SFN	MARCKSL1	ELF1	BRCC3
CD44	RAB3A	LMNB1	JUNB	CAPN2	DDC	WARS1	PSMC3	RASA1	GSPT1	PAICS	FASN	PSMA4	ABCC1	STIP1	PXN	RPL9P9	RPL27A
ITGB4	RAB3B	CAST	ITGA2	CEBPB	CAST	RPS3	TCP1	CDK11B	IFNGR1	SCP2	FNTA	S100P	ABCD1	S100A11	DNASE1L1	ACSL1	RPL5
CBR1	RAB4A	IMPDH1	GJA1	PTPN2	HNF1A	RPS6KB1	PTPN1	GSTM3	ARSA	UBA1	FNTB	COL5A3	MAN1A1	PRDX2	ALDH9A1	CDH5	RPL21
ANK1	RAB5A	RASA1	SMPD1	AMD1	IMPDH1	JAK1	IGFBP2	ATP6V1B2	B4GALT1	GPX3	CCT3	ITGA3	KDELR2	ARRB2	RPL34	KIF5B	RPL28
ACADS	RAB6A	CDK11B	UBTF	CTPS1	RASA1	PTPRE	ERCC2	ATP6V1C1	ACP3	NME2	ARRB1	ITGB8	MCM7	CDA	RPIA	CSTF2	RPS9
CREB1	MSH3	GSTM3	JUND	ENG	CDK11B	PTPRZ1	RPL35A	CSRP1	EZR	FDXR	TUFM	MSN	GALNS	DCTD	LMAN1	LSP1	RPS10
SLC25A16	PSMB1	ATP6V1B2	NDUFB7	DDX5	GSTM3	SP100	ITGB5	FLNA	ATP6V1B1	HNRNPA2B1	ALDH7A1	DDX6	SHMT1	PYCR1	NASP	DUT	MAP1B
GLB1	M6PR	ATP6V1C1	PRKACA	PFKL	ATP6V1B2	AHCY	ARF4	NF1	ATF2	RFX1	INPP1	DNMT1	SHMT2	GBP1	FMO5	ABCC1	GNPDA1
PPP3CB	COX5A	CSRP1	CAPN2	LGALS3	ATP6V1C1	CFL1	RPL7	MAOA	UCHL3	CBL	PCYT1A	U2AF2	EVI2B	GBP2	FASN	ABCD1	NEDD4
NCK1	LMNB1	FLNA	CEBPB	FLT1	CSRP1	EIF4B	EGR1	ACO1	FOSL2	PRKACB	AARS1	RPL13	EPHX2	ELF1	FNTA	MAN1A1	YAP1
GCFC2	OGN	NF1	PTPN2	PSMC3	FLNA	F8A3	VCL	ABCB4	HPGD	UQCRC2	CARS1	IVD	HSPA1L	CTH	FNTB	GALNS	UTRN
H1-5	CAST	MAOA	AMD1	TCP1	NF1	ATP2B4	GPX2	TNFAIP3	VAV1	SLC2A5	SARS1	S100A4	HSPA4	ICAM3	CCT3	SDC2	IQGAP1
EPCAM	IMPDH1	ACO1	CTPS1	PTPN1	ACO1	DGKA	PTPRA	KITLG	CD46	CPN2	PPM1F	MGAT1	MPI	RPL9P9	ARRB1	SHMT1	GYG1
POR	RASA1	ABCB4	DDX5	IGFBP2	NT5E	CPT2	NAT1	NT5E	NME1	FECH	CASP4	HMGB2	GPC1	ACSL1	TUFM	SHMT2	STT3A
MGMT	PTMS	TNFAIP3	PFKL	ERCC2	GPD1	DTYMK	SON	EPHA1	NQO1	MMP8	PSMB3	PTBP1	PFN2	CDH5	ALDH7A1	EVI2B	CAPZA2
FER	CDK11B	NT5E	LGALS3	RPL35A	EPHA1	RRM1	NELFE	VDAC1	GNS	MRC1	PSMB2	TARS1	CTNNA1	KIF5B	INPP1	EPHX2	CAPZB
ATP2A2	GSTM3	TAF1	IGFBP3	ITGB5	FGF7	CHM	RPL17	SDHB	PHKG2	IGHV1-2	ACADVL	VARS1	CTNNB1	CSTF2	SRP9	HSPA1L	QARS1
CPE	ATP6V1B2	EPHA1	PSMC3	ARF4	VDAC1	KDELR1	PGAM1	CD9	ARSB	CES1	YLPM1	EEF1G	PHB1	LSP1	AARS1	HSPA4	UQCRFS1
PLCG2	ATP6V1C1	VDAC1	TCP1	RPL7	ERBB3	EEF1B2	RCC1	BCKDHB	RPS2	FBLN1	TMED10	FKBP2	RDX	DUT	CARS1	MPI	ATP5PO
FAH	CSRP1	SDHB	PTPN1	VCL	SDHB	ATP5PB	SDC1	COMT	TCF3	TCEA1	NUMB	STOM	RPA3	ABCC1	HARS2	PRSS3	LIMS1
STMN1	FLNA	CD9	IGFBP2	PTPRA	CD9	TBXAS1	LIG1	TGM2	DSP	PTGS1	HINT1	PON1	SFTPD	ABCD1	SARS1	GPC1	CXCL12
YBX3	NF1	BCKDHB	ERCC2	NAT1	BCKDHB	ACP1	ATP5PF	MMUT	RPA2	ITGA6	NUP153	MAOB	RFC4	MAN1A1	PPM1F	PFN2	PREP
ZNF24	MAOA	COMT	BMP7	SON	COMT	ACAT1	XRCC1	OSBP	MUC1	SFPQ	RANBP2	YWHAQ	RFC1	KDELR2	CASP4	CTNNA1	ME1
ZKSCAN1	ACO1	MMUT	RPL35A	NELFE	TGM2	TNC	KRT15	PCMT1	COX7C	PPIB	NDUFV1	MAPK3	RPL22	MCM4	PSMB3	CTNNB1	PIP4K2A
NAGA	TNFAIP3	OSBP	ITGB5	RPL17	MMUT	MYL9	KRT4	FBL	ALOX15	ME2	GSK3B	MARK3	SPR	MCM5	PSMB2	PHB1	ARCN1
HMGA1	NT5E	PCMT1	ARF4	PGAM1	OSBP	POLR2A	PAM	GART	CD44	WARS1	NT5C2	CALML3	PTGS2	MCM7	ACADVL	RDX	LSS
TMEM11	TAF1	FBL	RPL7	RCC1	PCMT1	CDK2	CDH2	CDH3	NQO2	RPS3	SEPHS1	RPL10	THBS2	GALNS	YLPM1	RPA3	GCLC
GOT1	GPD1	GART	VCL	SDC1	FUT4	GRK2	TSPAN8	PAICS	ITGB4	JAK1	SELENOP	COL8A1	IDUA	RNASE4	TMED10	SFTPD	GCLM
IFNAR1	EPHA1	CDH3	GPX2	LIG1	FBL	MCM3	PLCG1	IDS	CBR1	PTPRE	CAMP	RPA1	SAA4	SHMT1	NUMB	RFC4	PSMD8
PRKCA	VDAC1	PAICS	LBP	ATP5PF	GART	NFYB	UGT1A6	SCP2	ACADS	PTPRG	MTHFS	APEX1	FBN1	SHMT2	HINT1	RFC1	GSS
JUNB	SDHB	SCP2	PTPRA	XRCC1	TNXB	MPST	CD58	UBA1	CREB1	SP100	GMPS	CD82	AGL	EVI2B	FHIT	RPL22	CCT5
ITGA2	CD9	UBA1	NAT1	PLCG1	PAICS	LAMA1	NCL	NME2	GLB1	TNFSF4	MRE11	DCK	MYH9	EPHX2	RANBP2	SPR	NES
GJA1	BCKDHB	GPX3	ITGB6	CD58	SCP2	RPS12	HK1	FDXR	PPP3CB	AHCY	ENTPD1	CAD	MYH10	HSPA1L	TSC2	IDUA	CSNK1A1
SMPD1	COMT	NME2	SON	NCL	UGT1A1	BRD2	POLR2C	HNRNPA2B1	NCK1	CFL1	HNMT	CALR	COPB2	HSPA4	NDUFV1	SAA4	IDH2
UBTF	TGM2	ENPP1	NELFE	HK1	UBA1	FAS	POLR2E	RFX1	GCFC2	EIF4B	GNAQ	MAP4	SOAT1	MPI	NT5C2	FBN1	PITPNB
JUND	MMUT	H1-6	RPL17	POLR2C	GPX3	YY1	NDUFV2	CBL	H1-5	ATP2B4	IDH3A	CANX	ADD1	PRSS3	SEPHS1	AGL	ADGRE5
NDUFB7	OSBP	FDXR	PGAM1	POLR2E	NME2	DNAJB1	ERCC3	PRKACB	EPCAM	DGKA	SULT1A1	PIK3R1	ADD2	GPC1	CAMP	MYH9	MARCKSL1
PRKACA	PCMT1	HNRNPA2B1	RCC1	NDUFV2	ENPP1	DNAJB2	TRIM21	UQCRC2	POR	CPT2	GDI2	PSMB8	BSG	PFN2	MTHFS	MYH10	PXN
CAPN2	FBL	RFX1	SDC1	ERCC3	FGFR4	ATP5F1A	TFEB	FECH	ABO	DTYMK	EMD	PSMB9	TIMP3	CTNNA1	GMPS	COPB2	MAPKAPK2
CEBPB	GART	CALB2	ATF6	TRIM21	FDXR	CTSS	EIF2AK2	FBLN1	MGMT	RRM1	CPT1A	PSMA5	NUP214	CTNNB1	MRE11	ACTN2	ALDH9A1
PTPN2	CDH3	CBL	LIG1	TFEB	HNRNPA2B1	PSMA1	SRM	TCEA1	FER	LAMA2	GATM	HLA-DMA	DEK	PHB1	ENTPD1	SOAT1	RPL34
CTPS1	PAICS	PRKACB	ATP5PF	EIF2AK2	RFX1	PSMA2	SLC9A1	ITGA6	ATP2A2	FCAR	SERPINB9	HLA-DMB	MYH11	RDX	RBP2	ADD1	RPIA
ENG	SCP2	UQCRC2	XRCC1	SRM	CALB2	PSMA3	CSNK2A2	SFPQ	PLCG2	COX7A1	SERPINH1	PSMB4	PPM1A	RPA3	HNMT	ADD2	LMAN1
DDX5	UBA1	TGM1	KRT15	SLC9A1	CBL	PSMA4	RXRA	TUBG1	FAH	CHM	VASP	PSMB5	IGFALS	RFC4	GNAQ	BSG	NASP
PFKL	GPX3	FECH	KRT4	CSNK2A2	PRKACB	S100P	ITIH2	PPIB	STMN1	KDELR1	DNM2	GSTM2	AHR	RPL22	IDH3A	TIMP3	FMO5
LGALS3	NME2	XPA	PLCG1	RXRA	UQCRC2	ITGA3	NFKB1	ANOS1	YBX3	EEF1B2	METAP2	ABCD3	KRT2	SPR	SULT1A1	NUP214	FASN
FLT1	ENPP1	CES1	UGT1A6	ITIH2	AADAC	ITGB8	TYMP	ME2	ZNF24	ATP5PB	NUDT2	NDUFS1	HMGCL	PTGS2	SULT1A2	DEK	FNTA
PSMC3	FDXR	FBLN1	CD58	ITIH1	FECH	MSN	ATP2B1	WARS1	ZKSCAN1	TBXAS1	RASSF2	POLD1	PSMC2	THBS2	MMP14	MYH11	DHPS
TCP1	HNRNPA2B1	TCEA1	NCL	NFKB1	XPA	PTPN3	EIF2S2	RPS3	NAGA	ACP1	LRBA	MAPK1	CHI3L1	IDUA	GDI2	GLRX	CCT3
PTPN1	RFX1	ITGA6	HK1	TYMP	CES1	DDX6	ANXA7	RPS6KB1	HMGA1	ACAT1	BCAM	GCA	GGT5	KRT9	EMD	PPM1A	ARRB1
IGFBP2	CALB2	SFPQ	POLR2C	ATP2B1	FBLN1	DNMT1	TBP	JAK1	ZNF8	TNC	PPT1	LAP3	ARL2	SAA4	CPT1A	IGFALS	TUFM
ERCC2	CBL	TUBG1	POLR2E	EIF2S2	TCEA1	U2AF2	BTF3	PTPRE	TMEM11	MYL9	RPL14	CD34	ARL3	FBN1	SERPINB9	AHR	ALDH7A1
RPL35A	PRKACB	PPIB	NDUFV2	ANXA7	ITGA6	RPL13	RAB3A	PTPRZ1	GOT1	POLR2A	CCT8	CD38	MAP2K2	AGL	SERPINH1	HMGCL	INPP1
ITGB5	UQCRC2	ME2	ERCC3	TBP	SFPQ	IVD	RAB4A	SP100	PRKCA	CDK2	CCT4	S100A2	ATP5F1C	MYH9	VASP	PSMC2	AARS1
ARF4	FECH	WARS1	TFEB	CCNA2	TUBG1	S100A4	RAB5A	AHCY	JUNB	GRK2	ANXA11	GTF2E1	ATP6V1E1	MYH10	DNM2	CHI3L1	CARS1
RPL7	XPA	RPS3	EIF2AK2	BTF3	PPIB	MGAT1	RAB6A	CFL1	ITGA2	MCM3	FXR1	PCSK1	CPOX	COPB2	METAP2	GGT5	SARS1
VCL	CES1	RPS6KB1	SRM	ALOX5AP	ME2	HMGB2	MSH3	EIF4B	GJA1	NFYB	RAB5C	TPP2	RPL4	SOAT1	NUDT2	ARL2	PPM1F
PTPRA	FBLN1	PTPRE	CSNK2A2	RAB3A	WARS1	PTBP1	PSMB1	F8A3	SMPD1	AZGP1	RAB7A	IMPA1	LONP1	ADD1	TNFSF10	ARL3	CASP4
NAT1	TCEA1	PTPRZ1	RXRA	RAB3B	RPS3	TARS1	M6PR	ATP2B4	UBTF	MPST	RAB9A	PTPN6	PGM1	BSG	LRBA	MAP2K2	PSMB3
SON	ITGA6	SP100	ITIH2	RAB4A	RPS6KB1	VARS1	COX5A	DGKA	JUND	LAMA1	RAB13	SHC1	PPP1CC	TIMP3	BCAM	ATP5F1C	PSMB2
NELFE	SFPQ	AHCY	ITIH1	RAB5A	JAK1	EEF1G	LMNB1	CPT2	ATF7	RPS12	RAB27A	CRABP2	GNL1	FUS	RPL14	ATP6V1E1	ACADVL
RPL17	TUBG1	CFL1	CEL	RAB6A	PTPRE	FKBP2	CAST	DTYMK	NDUFB7	FAS	PLCD1	TKT	SERPINB5	NUP214	CCT8	CPOX	YLPM1
PGAM1	PPIB	EIF4B	NFKB1	MSH3	PTPRG	STOM	CYP2B6	RRM1	PRKACA	YY1	DAP3	CASP1	POLR2I	DEK	CCT4	RPL4	TMED10
RCC1	ME2	F8A3	TYMP	PSMB1	SP100	YWHAQ	IMPDH1	LAMA2	CAPN2	DNAJB1	DUSP3	NOS3	SERPINF1	MYH11	ANXA11	LONP1	RBM25
SDC1	WARS1	ATP2B4	ATP2B1	M6PR	AHCY	MAPK3	RASA1	CHM	CEBPB	DNAJB2	IDH3G	SERPINB3	DLST	GLRX	FXR1	PGM1	NUMB
ATF6	RPS3	DGKA	EIF2S2	COX5A	CFL1	MARK3	PTMS	KDELR1	PTPN2	ATP5F1A	GALK1	LMOD1	GMPR	PPM1A	RAB5C	PPP1CC	HINT1
LIG1	RPS6KB1	CPT2	ANXA7	LMNB1	EIF4B	ARNT	CDK11B	EEF1B2	CTPS1	CTSS	BCAP31	PML	GPX4	IGFALS	RAB7A	TGFBR1	NUP153
ATP5PF	JAK1	DTYMK	TBP	BCL3	F8A3	RPL10	GSTM3	ATP5PB	DDX5	PSMA1	TPMT	SERPINA4	SRP14	KRT20	RAB9A	GNL1	RANBP2
XRCC1	PTPRE	RRM1	CCNA2	OGN	ATP2B4	RPA1	ATP6V1B2	IGFBP5	PFKL	PSMA2	RENBP	EEF1D	NUP62	KRT2	RAB13	POLR2I	NDUFV1
PLCG1	SP100	CHM	BTF3	CAST	CPT2	APEX1	ATP6V1C1	ACP1	LGALS3	PSMA3	MECP2	OAS2	HPCAL1	HMGCL	RAB27A	SERPINF1	NT5C2
CD58	AHCY	KDELR1	ALOX5AP	IMPDH1	DTYMK	CD82	CSRP1	ACAT1	IGFBP3	PSMA4	HCFC1	MARCKS	TAGLN2	PSMC2	PLCD1	DLST	SEPHS1
NCL	CFL1	EEF1B2	RAB3A	NEB	RRM1	DCK	FLNA	TNC	PSMC3	S100P	CAV2	AQP1	TALDO1	CHI3L1	DAP3	GMPR	SELENOP
HK1	EIF4B	ATP5PB	RAB3B	RASA1	LAMA2	CAD	NF1	MYL9	TCP1	COL5A3	ALDH3A2	GNA11	SNCA	GGT5	DUSP3	GPX4	CAMP
POLR2C	F8A3	ACP1	RAB4A	PTMS	CHM	CALR	MAOA	POLR2A	PTPN1	NFKBIA	HSD17B4	ALDH4A1	ETFB	ARL2	GALK1	SRP14	MTHFS
POLR2E	ATP2B4	ACAT1	RAB5A	CDK11B	KDELR1	MAP4	ACO1	CDK2	IGFBP2	ITGA3	PSMD7	ERP29	LIPA	ARL3	BCAP31	TGFBR2	GMPS
NDUFV2	DGKA	POLR2A	RAB6A	GSTM3	EEF1B2	CANX	KITLG	GRK2	ERCC2	ITGB8	SUOX	PRDX6	ATP6V1A	MAP2K2	TPMT	NUP62	MRE11
ERCC3	CPT2	CDK2	MSH3	ATP6V1B2	ATP5PB	PIK3R1	TAF1	MCM3	RPL35A	MSN	STAT5B	BLVRB	HSPA9	ATP5F1C	RENBP	HPCAL1	ENTPD1
TRIM21	DTYMK	APC	MX2	ATP6V1C1	TBXAS1	PSMB8	EPHA1	NFYB	ITGB5	DDX6	VAMP7	PRDX5	EIF4A3	ATP6V1E1	MECP2	TAGLN2	HNMT
EIF2AK2	RRM1	GRK2	PSMB1	CSRP1	ACP1	PSMB9	VDAC1	MPST	ARF4	DNMT1	HDGF	DDT	RPS19	CPOX	HCFC1	TALDO1	GNAQ
SRM	LAMA2	MCM3	M6PR	FLNA	ACAT1	PSMA5	SDHB	LAMA1	RPL7	U2AF2	LUM	GCHFR	RPL3	RPL4	CAV2	SNCA	GNG10
SLC9A1	CHM	NFYB	COX5A	NF1	POLR2A	PSMB4	CD9	RPS12	VCL	RPL13	PRELP	PRDX3	COL15A1	NUDT1	ALDH3A2	ETFB	IDH3A
CSNK2A2	KDELR1	MPST	LMNB1	MAOA	CDK2	PSMB6	BCKDHB	BRD2	GPX2	IVD	CNN1	ATP5F1D	COL18A1	LONP1	ALDH5A1	LIPA	SULT1A1
RXRA	EEF1B2	LAMA1	BCL3	ACO1	GRK2	PSMB5	COMT	FAS	PTPRA	MGAT1	NDUFA8	RPL12	DDOST	PGM1	GPC3	ATP6V1A	SULT1A2
ITIH2	ATP5PB	RPS12	OGN	TNFAIP3	MCM3	GSTM2	TGM2	YY1	NAT1	HMGB2	HNRNPA3	ECHS1	FEN1	PPP1CC	HSD17B4	HSPA9	PPOX
ITIH1	ACP1	BRD2	CAST	NT5E	NFYB	ABCD3	MMUT	DNAJB1	IL1RN	PTBP1	PGD	CMPK1	CUX1	SERPINB5	PSMD7	EIF4A3	GDI2
NFKB1	ACAT1	YY1	IMPDH1	GPD1	AZGP1	ITPRID2	OSBP	DNAJB2	ITGB6	TARS1	HNRNPM	PEBP1	CAPG	POLR2I	SUOX	RPS19	EMD
NCF2	CCNC	DNAJB1	RASA1	FGF7	MPST	NDUFS1	PCMT1	ATP5F1A	SON	VARS1	NCBP2	PDIA3	CAP2	SERPINF1	STAT5B	RPL3	CPT1A
FST	POLR2A	DNAJB2	CDK11B	VDAC1	LAMA1	POLD1	FBL	CTSS	NELFE	EEF1G	RAP1GDS1	PPP2R1A	TXLNA	DLST	VAMP7	COL15A1	SERPINB8
TYMP	CDK2	ATP5F1A	FUT3	RYR1	RPS12	SMARCA1	RPS4Y1	PSMA1	RPL17	FKBP2	ARHGDIA	PPP2R1B	CCT6A	GPX4	RPS6KA3	COL18A1	SERPINB9
ATP2B1	APC	PSMA1	GSTM3	SDHB	BRD2	MAPK1	GART	PSMA2	PGAM1	STOM	ARHGDIB	CDC27	NNMT	SRP14	HDGF	DDOST	SERPINH1
EIF2S2	GRK2	PSMA2	ATP6V1B2	CD9	YY1	GCA	CDH3	PSMA3	RCC1	PON1	AGFG1	FCER1G	PSMB10	NUP62	LUM	FEN1	VASP
ANXA7	MCM3	PSMA3	ATP6V1C1	BCKDHB	DNAJB1	ERCC5	PAICS	PSMA4	SDC1	MAOB	HNRNPF	NMT1	ADH7	HPCAL1	PRELP	CUX1	DNM2
TBP	NFYB	PSMA4	CSRP1	COMT	DNAJB2	LAP3	IDS	S100P	LIG1	YWHAQ	STAT2	HLA-F	RPL13A	TAGLN2	CNN1	CAPG	METAP2
CCNA2	MPST	S100P	FLNA	TGM2	ATP5F1A	S100A2	SCP2	ITGA3	ATP5PF	MAPK3	GTF2A1	HMOX2	ARL1	TALDO1	NDUFA8	CAP2	NUDT2
BTF3	LAMA1	ITGA3	NF1	MMUT	PSMA1	GTF2E1	UBA1	ITGB8	XRCC1	MARK3	SMS	ADSS2	STAT3	SNCA	HNRNPA3	IL6ST	TNFSF10
ALOX5AP	RPS12	ITGB8	MAOA	OSBP	PSMA2	GTF2E2	NME2	MSN	KRT15	CALML3	HK2	LRPAP1	PEX19	ETFB	PGD	TXLNA	LRBA
RAB3A	BRD2	MSN	ACO1	PCMT1	PSMA3	TPP2	FDXR	PTPN3	KRT4	ARNT	HK3	ADSL	MDH1	COIL	HNRNPM	CCT6A	BCAM
RAB3B	FAS	PTPN3	S1PR1	FUT4	PSMA4	IMPA1	HNRNPA2B1	DDX6	PAM	RPL10	MRPL12	CLIP1	MDH2	LIPA	KPNA1	NNMT	RPL14
RAB4A	YY1	DDX6	SYT1	FBL	S100P	EPHA2	RFX1	DNMT1	TSPAN8	COL8A1	THOP1	SRI	HADHA	ATP6V1A	RAP1GDS1	PSMB10	CCT8
RAB5A	DNAJB1	DNMT1	TNFAIP3	RPS4Y1	ITGA3	EPHA8	CBL	U2AF2	PLCG1	RPA1	CAPZA1	GNA15	EIF2S3	HSPA9	ARHGDIA	PBX1	CCT4
RAB6A	DNAJB2	U2AF2	KITLG	GART	ITGB8	PTPN6	PRKACB	RPL13	UGT1A6	APEX1	CRIP2	GSTT1	CETN2	EIF4A3	ARHGDIB	ARL1	ANXA11
MSH3	ATP5F1A	RPL13	NT5E	CDH3	PTPN3	SHC1	UQCRC2	IVD	CD58	CD82	NUP98	SERPINB1	MNDA	RPS19	AGFG1	STAT3	FXR1
PSMB1	PSMA1	IVD	TAF1	PAICS	DDX6	MPG	FECH	S100A4	NCL	DCK	BLVRA	ALDH1B1	PTGDS	RPL3	HNRNPF	MDH1	RAB5C
M6PR	PSMA2	CNTF	GPD1	SCP2	DNMT1	KDM5A	FBLN1	MGAT1	HK1	CAD	SLC25A1	ALDH3A1	UBA7	COL15A1	STAT2	MDH2	RAB7A
COX5A	PSMA3	MGAT1	FGF7	UBA1	U2AF2	TKT	TCEA1	HMGB2	POLR2C	CALR	PPP5C	POLR2B	NAA10	COL18A1	GTF2A1	RFC5	RAB9A
LMNB1	PSMA4	HMGB2	VDAC1	GPX3	RPL13	CASP1	ITGA6	PTBP1	POLR2E	MAP4	ARFIP1	SDHA	PPP1R2	DDOST	SMS	RFC3	RAB13
OGN	S100P	PTBP1	BGN	NME2	IVD	SERPINB3	SFPQ	TARS1	NDUFV2	CANX	ACLY	CORO1A	CSK	FEN1	HK2	HADHA	RAB27A
CAST	ITGA3	TARS1	SDHB	ENPP1	MGAT1	PML	TUBG1	VARS1	ERCC3	PIK3R1	FOSB	GDI1	GARS1	MMP12	HK3	EIF2S3	PLCD1
IMPDH1	ITGB8	VARS1	CD9	FDXR	HMGB2	EEF1D	PPIB	EEF1G	TRIM21	PSMB8	SUCLG1	S100A7	IARS1	CAPG	MRPL12	CETN2	DAP3
RASA1	MSN	EEF1G	BCKDHB	FGFR3	PTBP1	MARCKS	ANOS1	FKBP2	TFEB	PSMB9	MVD	MAT2A	ACTR1B	CAP2	THOP1	MNDA	DUSP3
CDK11B	PTPN3	FKBP2	COMT	HNRNPA2B1	TARS1	GNA11	ME2	STOM	EIF2AK2	PSMA5	COPB1	PRKAR2B	ECI1	CCT6A	AKR1C2	PTGDS	IDH3G
GSTM3	DDX6	MAOB	TGM2	RFX1	VARS1	ALDH4A1	WARS1	MAOB	SRM	HLA-DMA	COPA	CPS1	TMPO	NNMT	CAPZA1	BUD31	GALK1
ATP6V1B2	DNMT1	YWHAQ	MMUT	CBL	EEF1G	PBLD	RPS3	YWHAQ	SLC9A1	HLA-DMB	AP2S1	RRM2	STAT1	PSMB10	CRIP2	UBA7	BCAP31
ATP6V1C1	U2AF2	MAPK3	OSBP	PRKACB	FKBP2	ERP29	RPS6KB1	MAPK3	CSNK2A2	PSMB4	ITGA8	TIA1	STAT6	ADH7	NUP98	NAA10	RENBP
CSRP1	RPL13	MARK3	PCMT1	UQCRC2	CNTFR	PRDX6	JAK1	MARK3	RXRA	PSMB5	IST1	FMO3	STAT5A	ARL1	BLVRA	PPP1R2	MECP2
FLNA	IVD	CALML3	FBL	FECH	STOM	BLVRB	PTPRE	ARNT	ITIH2	GSTM2	SEC24C	DNAJA1	AKR1C3	STAT3	SLC25A1	CSK	HCFC1
NF1	MGAT1	ARNT	GART	AMPD1	ANXA13	PRDX5	PTPRG	RPL10	CEL	ABCD3	SUB1	AKT1	ARHGAP25	MDH1	PPP5C	GARS1	CAV2
MAOA	HMGB2	RPL10	CDH3	FBLN1	YWHAQ	DDT	SP100	RPA1	NFKB1	ITPRID2	RARS1	AKT2	PI4KA	MDH2	ARFIP2	IARS1	ALDH3A2
ACO1	PTBP1	RPA1	PAICS	TCEA1	MAPK3	GCHFR	AHCY	APEX1	TYMP	NDUFS1	ATXN3	UQCRC1	EPS15	HADHA	ARFIP1	TSPAN7	HSD17B4
ABCB4	TARS1	APEX1	ACHE	PTGS1	MARK3	PRDX3	CFL1	CD82	ATP2B1	POLD1	CACNA2D1	HIBADH	CASP3	EIF2S3	ACLY	PRKCI	PSMD7
TNFAIP3	VARS1	CD82	SCP2	ITGA6	ARNT	ATP5F1D	EIF4B	DCK	EIF2S2	MAPK1	YARS1	ATIC	LRPPRC	CETN2	COL4A4	ACTR1B	SUOX
NT5E	EEF1G	DCK	UBA1	SFPQ	RPL10	RPL12	F8A3	CAD	ANXA7	GCA	USP14	HNRNPH3	ACAA2	MNDA	SUCLG1	ECI1	STAT5B
TAF1	FKBP2	CAD	GPX3	TUBG1	RPA1	ECHS1	ATP2B4	CALR	TBP	LAP3	PRKAG1	HNRNPH1	RPL35	PTGDS	MVD	TMPO	USP11
GPD1	PON1	CALR	NME2	PPIB	APEX1	CMPK1	DGKA	MAP4	CCNA2	HSD11B1	HSPA2	YWHAB	WAS	UBA7	PGGT1B	STAT1	VAMP7
VDAC1	YWHAQ	MAP4	ENPP1	ME2	CD82	PEBP1	CPT2	CANX	BTF3	CD34	ATP1B3	SFN	PRCP	NAA10	RABGGTB	STAT6	RPS6KA3
SDHB	MAPK3	CANX	FGFR4	WARS1	DCK	PDIA3	DTYMK	PIK3R1	RAB3A	CD38	RAD23A	STIP1	HTT	PPP1R2	COPB1	STAT5A	HDGF
CD9	MARK3	PIK3R1	H1-6	RPS3	CAD	PPP2R1A	RRM1	ITPKB	RAB4A	GJB2	RAD23B	S100A11	ECE1	CSK	COPA	ARHGAP25	LUM
BCKDHB	CALML3	PSMB8	FDXR	JAK1	CALR	PPP2R1B	CHM	PSMB8	RAB5A	S100A2	EPHB4	FCGR2B	MTHFR	GARS1	AP2S1	MTOR	PRELP
COMT	ARNT	PSMB9	HNRNPA2B1	PTPRE	MAP4	CDC27	KDELR1	PSMB9	RAB6A	GTF2E1	NAGLU	INPP5B	PAFAH1B1	IARS1	ITGA8	PI4KA	CNN1
TGM2	CERS1	PSMA5	RFX1	PTPRG	CANX	NKTR	NR2F2	PSMA5	MSH3	TPP2	GALC	PRDX2	MCAM	PRKCI	SMTN	EPS15	NDUFA8
MMUT	RPL10	PSMB4	CALB2	SP100	PIK3R1	NMT1	EEF1B2	PSMB4	PSMB1	IMPA1	AK2	ARRB2	CRAT	ACTR1B	IST1	CASP3	HNRNPA3
OSBP	RPA1	PSMB6	PRKACB	AHCY	PSMB8	HLA-F	ATP5PB	PSMB6	M6PR	EPHA2	HMGCS2	DCTD	MATR3	ECI1	SEC24C	RPS27	PGD
PCMT1	APEX1	PSMB5	UQCRC2	CFL1	PSMB9	HMOX2	ACP1	PSMB5	COX5A	PTPN6	ALDH18A1	PYCR1	MSH2	TMPO	SUB1	LRPPRC	HNRNPM
FBL	CD82	GSTM2	FECH	EIF4B	PSMA5	ADSS2	ACAT1	GSTM2	LMNB1	SHC1	NAPA	SLC8A1	GPD2	STAT1	RARS1	ACAA2	KPNA1
RPS4Y1	DCK	ABCD3	AMPD1	F8A3	PSMB4	LRPAP1	TNC	ABCD3	CAPN3	CRABP2	ADPRH	GBP1	SSR1	STAT6	ATXN3	RPL35	RAP1GDS1
GART	CAD	ITPRID2	CES1	ATP2B4	PSMB6	ADSL	MYL9	ITPRID2	CAST	TKT	AIF1	GBP2	ALDH3B1	MTREX	CACNA2D1	WAS	ARHGDIA
CDH3	CALR	NDUFS1	FBLN1	ITPKA	PSMB5	CLIP1	POLR2A	NDUFS1	IMPDH1	CASP1	PSMD4	ELF1	ZAP70	AKR1C3	YARS1	PRCP	ARHGDIB
PAICS	MAP4	POLD1	TCEA1	DGKA	GSTM2	SRI	CDK2	POLD1	FLG	SERPINB3	RRAD	STX2	SYK	ARHGAP25	USP14	HTT	AGFG1
SCP2	CANX	SMARCA1	PTGS1	CPT2	ABCD3	GNA15	GRK2	SMARCA1	RASA1	LMOD1	PLTP	DSG3	RANBP1	MTOR	PRKAG1	ECE1	HNRNPF
UBA1	PIK3R1	MAPK1	ITGA6	DTYMK	TMOD1	GSTT1	MCM3	MAPK1	PTMS	PML	CSE1L	ICAM3	NAMPT	PI4KA	HSPA2	MTHFR	GTF2A1
GPX3	PSMB8	GCA	SFPQ	RRM1	ITPRID2	SERPINB1	NFYB	GCA	CDK11B	EEF1D	VCP	RPL9P9	AFM	EPS15	BCAT1	PAFAH1B1	SMS
NME2	PSMB9	RXRB	TUBG1	LAMA2	NDUFS1	SLC7A1	MPST	LAP3	FUT3	OAS2	MFAP4	ACSL1	PSMC4	CASP3	ATP1B3	MCAM	HK2
ENPP1	PSMA5	ERCC5	PPIB	CHM	POLD1	ALDH1B1	LAMA1	GJB2	GSTM3	MARCKS	HADHB	CDH5	TSFM	RPS27	RAD23A	CRAT	HK3
FDXR	PSMB4	RBL1	ME2	KDELR1	SMARCA1	ALDH3A1	RPS12	S100A2	ATP6V1B2	AQP1	AQP4	KIF5B	ASPA	LRPPRC	RAD23B	MATR3	MRPL12
HNRNPA2B1	PSMB6	LAP3	WARS1	EEF1B2	MAPK1	POLR2B	BRD2	GTF2E1	ATP6V1C1	GNA11	MANF	CSTF2	PPIC	ACAA2	GALC	MSH2	THOP1
RFX1	PSMB5	CD38	RPS3	ATP5PB	GCA	SDHA	FAS	GTF2E2	CSRP1	ALDH4A1	AFDN	LSP1	VDAC2	RPL35	AK2	GPD2	CAPZA1
CBL	GSTM2	S100A2	RPS6KB1	ACP1	RXRB	CORO1A	YY1	TPP2	FLNA	ERP29	NAP1L1	DUT	ACADSB	PRCP	PRRX1	SSR1	CRIP2
PRKACB	ABCD3	GTF2E1	JAK1	ACAT1	ERCC5	GDI1	DNAJB1	IMPA1	NF1	PRDX6	CASP7	ABCC1	CBX5	HTT	NAPA	ALDH3B1	NUP98
UQCRC2	ITPRID2	GTF2E2	PTPRE	TNC	RBL1	MAT2A	DNAJB2	EPHA2	MAOA	BLVRB	ADK	ABCD1	USP5	ECE1	ADPRH	PTPN9	BLVRA
TGM1	NDUFS1	TPP2	PTPRG	POLR2A	LAP3	CPS1	ATP5F1A	PTPN6	ACO1	PRDX5	ADAR	MAN1A1	MAPK8	MTHFR	AIF1	SYK	SLC25A1
FECH	POLD1	IMPA1	PTPRZ1	CDK2	CD38	RRM2	CTSS	SHC1	KITLG	DDT	LAMB2	KDELR2	MAPK9	PAFAH1B1	RRAD	RANBP1	PPP5C
MRC1	SMARCA1	EPHA2	SP100	GRK2	GJB2	SDC4	PSMA1	MPG	NT5E	PRDX3	CDH11	TTK	MAP2K4	MCAM	PLTP	NAMPT	ARFIP1
AMPD1	MAPK1	PTPN6	AHCY	MCM3	GTF2E1	TIA1	PSMA2	CRABP2	TAF1	ATP5F1D	CDH13	MCM4	PHKA2	CRAT	CSE1L	AFM	ACLY
FBLN1	GCA	SHC1	CFL1	NFYB	GTF2E2	SLC6A6	PSMA3	KDM5A	EPHA1	RPL12	TPD52	MCM5	RANGAP1	MATR3	VCP	PSMC4	COL4A4
TCEA1	RXRB	MPG	EIF4B	MPST	TPP2	DNAJA1	PSMA4	TKT	VDAC1	ECHS1	SEC13	MCM7	RECQL	MSH2	MFAP1	ASPA	SUCLG1
PTGS1	ERCC5	ARID4A	ATP2B4	LAMA1	IMPA1	AKT1	S100P	CASP1	ERBB3	CMPK1	NPEPPS	GALNS	NOP2	BTD	MFAP4	PPIC	MVD
ITGA6	LAP3	KDM5A	ITPKA	RPS12	EPHA2	AKT2	ITGA3	SERPINB3	SDHB	PEBP1	HNRNPH2	RNASE4	CRK	GPD2	HADHB	VDAC2	COPB1
SFPQ	CD38	TKT	DGKA	BRD2	EPHB2	UQCRC1	ITGB8	PML	CD9	PDIA3	OXCT1	SHMT1	CRKL	SSR1	AQP4	ACADSB	COPA
TUBG1	GTF2E1	NOS1	CPT2	FAS	PTPN6	HIBADH	MSN	TYK2	MATN1	PPP2R1A	EIF3B	SHMT2	MTIF2	MAGEA9B	GDF10	CBX5	AP2S1
PPIB	GTF2E2	SERPINB3	DTYMK	YY1	SHC1	ATIC	PTPN3	EEF1D	BCKDHB	PPP2R1B	FCGRT	EVI2B	BAG6	MAGEA10	MANF	USP5	ITGA8
ME2	TPP2	PML	RRM1	DNAJB1	MPG	HNRNPH3	DDX6	MARCKS	COMT	CDC27	BID	EPHX2	NSF	PTPN9	AFDN	MAPK8	IST1
WARS1	IMPA1	EEF1D	LAMA2	DNAJB2	ARID4A	HNRNPH1	DNMT1	GNA11	TGM2	FCER1G	ATP5MF	HSPA1L	CDKN1B	SYK	NAP1L1	MAPK9	SEC24C
RPS3	EPHA2	OAS2	CHM	ATP5F1A	KDM5A	YWHAB	U2AF2	ALDH4A1	MMUT	NMT1	MARS1	HSPA4	MAP2K3	RANBP1	ADK	MAP2K4	SUB1
JAK1	EPHB2	CRABP1	KDELR1	PSMA1	TKT	SFN	RPL13	PBLD	OSBP	HLA-F	ITGA1	MPI	BRCC3	NAMPT	ADAR	RANGAP1	RARS1
PTPRE	PTPN6	MARCKS	EEF1B2	PSMA2	PML	STIP1	IVD	ERP29	PCMT1	HMOX2	ARPP19	PRSS3	RPL27A	AFM	LAMB2	RECQL	ATXN3
PTPRG	SHC1	GNA11	ATP5PB	PSMA3	SERPINA4	S100A11	S100A4	PRDX6	FBL	ADSS2	AP1S2	GPC1	RPL5	PSMC4	CDH11	NOP2	CACNA2D1
SP100	MPG	ALDH4A1	TBXAS1	PSMA4	EEF1D	INPP5B	MGAT1	BLVRB	GART	LRPAP1	ATP5ME	PFN2	RPL21	PPIC	CDH13	CRK	YARS1
AHCY	KDM5A	ERP29	IGFBP5	S100P	CRABP1	PRDX2	HMGB2	PRDX5	CDH3	ADSL	EIF6	CA8	RPL28	VDAC2	TPD52	CRKL	USP14
CFL1	TKT	PRDX6	ACP1	COL5A3	MARCKS	ARRB2	PTBP1	DDT	PAICS	CLIP1	NRG3	CTNNA1	RPS9	ACADSB	SEC13	BAG6	PRKAG1
EIF4B	NOS1	BLVRB	ACAT1	ITGA3	GNA11	GK	TARS1	GCHFR	SCP2	SRI	JAM2	CTNNB1	RPS5	USP5	NPEPPS	GSTM5	HSPA2
F8A3	EEF1D	PRDX5	POLR2A	ITGB8	ALDH4A1	OTX1	VARS1	PRDX3	UBA1	GNA15	TMEM33	PHB1	RPS10	MAPK8	HNRNPH2	NSF	BCAT1
ATP2B4	CRABP1	DDT	CDK2	PTX3	PBLD	DCTD	EEF1G	ATP5F1D	GPX3	GSTT1	SYNJ2BP	RDX	MAP1B	MAPK9	OXCT1	CDKN1B	ATP1B3
ITPKA	MARCKS	PRDX3	APC	MSN	ERP29	PYCR1	FKBP2	RPL12	NME2	SERPINB1	RAB25	RPA3	GNPDA1	MAP2K4	EIF3B	MAP2K3	RAD23A
DGKA	GNA11	ATP5F1D	GRK2	PTPN3	PRDX6	GBP1	STOM	ECHS1	ENPP1	ALDH1B1	CORO7	RFC4	NEDD4	MKI67	FCGRT	BRCC3	RAD23B
CPT2	ALDH4A1	RPL12	MCM3	DDX6	BLVRB	GBP2	YWHAQ	CMPK1	FDXR	POLR2B	NUP107	RFC1	YAP1	SLC15A1	BID	RPL27A	EPHB4
DTYMK	PBLD	ECHS1	NFYB	DNMT1	PRDX5	ELF1	MAPK3	PEBP1	HNRNPA2B1	SDHA	GSDMD	RPL22	UTRN	RANGAP1	ATP5MF	RPL5	GALC
RRM1	ERP29	CMPK1	AZGP1	U2AF2	DDT	GTF2H1	MARK3	PDIA3	RFX1	CORO1A	EPPK1	GTF2F1	IQGAP1	RECQL	MARS1	RPL21	AK2
LAMA2	PRDX6	PEBP1	MPST	RPL13	PRDX3	DSG3	ARNT	PPP2R1A	CALB2	GDI1	ANTXR2	SPR	HAAO	NOP2	ITGA1	RPL28	ALDH18A1
CHM	BLVRB	PDIA3	LAMA1	CHML	ATP5F1D	CTH	RPL10	PPP2R1B	CBL	S100A7	SMIM11	THBS2	GYG1	CRK	ARPP19	RPS9	NAPA
KDELR1	PRDX5	PPP2R1A	RPS12	IVD	RPL12	RPL9P9	RPA1	CDC27	PRKACB	MAT2A	MTPN	IDUA	STT3A	CRKL	ATP5ME	RPS5	ADPRH
EEF1B2	DDT	PPP2R1B	BRD2	MGAT1	ECHS1	ACSL1	APEX1	PPIF	UQCRC2	PRKAR2B	RAB15	KRT9	PLA2G4A	BAG6	EIF6	RPS10	AIF1
ATP5PB	PRDX3	CDC27	YY1	HMGB2	CMPK1	KIF5B	CD82	NKTR	FECH	CPS1	GNG2	FBN1	CAPZA2	NSF	CTBP2	MAP1B	EIF5
ACP1	ATP5F1D	CCND3	DNAJB1	PTBP1	PEBP1	CSTF2	DCK	NMT1	XPA	RRM2	ARPC4	AGL	CAPZB	MAP2K3	WNT7B	GNPDA1	DRG2
ACAT1	RPL12	CDC25C	DNAJB2	TARS1	PDIA3	DUT	CAD	HLA-F	FBLN1	SDC4	CD81	MYH9	ALDH1A3	RPL27A	BCAR1	NEDD4	PLTP
TNC	ECHS1	PPIF	ATP5F1A	VARS1	PPP2R1A	ABCC1	CALR	HMOX2	TCEA1	TIA1	TPI1	MYH10	QARS1	RPL5	NRG3	YAP1	CSE1L
MYL9	CMPK1	NKTR	PSMA1	EEF1G	PPP2R1B	CKS2	MAP4	ADSS2	PTGS1	FMO3	EIF3E	COPB2	RPL29	RPL21	JAM2	UTRN	VCP
POLR2A	PEBP1	NMT1	PSMA2	FKBP2	CDC27	MAN1A1	CANX	LRPAP1	ITGA6	DNAJA1	SEC61B	SOAT1	UQCRFS1	RPL28	TMEM33	IQGAP1	MFAP4
CDK2	PDIA3	HMOX2	PSMA3	STOM	NKTR	KDELR2	PIK3R1	ADSL	SFPQ	AKT1	PPP4C	ADD1	ATP5PO	RPS9	SYNJ2BP	HAAO	HADHB
GRK2	PPP2R1A	ADSS2	PSMA4	PON1	NMT1	TTK	PSMB8	CLIP1	TUBG1	AKT2	GABARAPL2	ADD2	LIMS1	RPS5	RAB25	GYG1	AQP4
MCM3	PPP2R1B	LRPAP1	S100P	MAOB	HMOX2	MCM4	PSMB9	SRI	PPIB	UQCRC1	MYL6	BSG	CXCL12	RPS10	CORO7	STT3A	GDF10
NFYB	CDC27	ADSL	ITGA3	YWHAQ	ADSS2	MCM5	PSMA5	GNA15	ME2	HIBADH	EIF4A1	TIMP3	PREP	MAP1B	NUP107	CAPZA2	MANF
MPST	CCND3	CLIP1	MSN	MAPK3	LRPAP1	MCM7	PSMB4	GSTT1	WARS1	ATIC	RPS20	FUS	ME1	GNPDA1	GSDMD	CAPZB	AFDN
LAMA1	CDC25B	SRI	PTPN3	MARK3	ADSL	GALNS	PSMB6	SERPINB1	RPS3	HNRNPH3	PSMA6	NUP214	IREB2	NEDD4	EPPK1	ALDH1A3	NAP1L1
RPS12	PPIF	GNA15	DDX6	ARNT	CLIP1	SHMT1	PSMB5	SLC7A1	RPS6KB1	HNRNPH1	S100A10	DEK	RFX5	YAP1	ANTXR2	QARS1	CASP7
BRD2	NMT1	GSTT1	DNMT1	CERS1	SRI	SHMT2	GSTM2	ALDH1B1	JAK1	CASP14	CDC42	MYH11	PIP4K2A	UTRN	SMIM11	UQCRFS1	ADK
FAS	HMOX2	SERPINB1	U2AF2	RPL10	GSTT1	EPHX2	ABCD3	ALDH3A1	PTPRE	YWHAB	DSTN	GLRX	ARCN1	IQGAP1	MTPN	ATP5PO	ADAR
YY1	ADSS2	SLC7A1	RPL13	RPA1	SERPINB1	HSPA1L	ITPRID2	POLR2B	PTPRG	SFN	GMFB	PPM1A	LSS	HAAO	RAB15	LIMS1	LAMB2
DNAJB1	LRPAP1	ALDH1B1	IVD	APEX1	SLC7A1	HSPA4	NDUFS1	SDHA	PTPRZ1	STIP1	RAB8A	IGFALS	GCLC	GYG1	GNG2	PREP	CDH11
DNAJB2	ADSL	ALDH3A1	S100A4	CD82	ALDH1B1	MPI	POLD1	CORO1A	SP100	S100A11	SPCS3	AHR	GCLM	STT3A	ARPC4	ME1	CDH13
ATP5F1A	CLIP1	POLR2B	MGAT1	DCK	ALDH3A1	PRSS3	SMARCA1	GDI1	AHCY	FCGR2B	SRP54	KRT2	CD151	PLA2G4A	CD81	PIP4K2A	TPD52
PSMA1	SRI	NTS	HMGB2	CAD	POLR2B	GPC1	MAPK1	MAT2A	CFL1	INPP5B	RAB2A	HMGCL	PSMD8	CAPZA2	TPI1	ARCN1	SEC13
PSMA2	GNA15	SDHA	PTBP1	CALR	NTS	PFN2	GCA	CPS1	EIF4B	PRDX2	RAB5B	PSMC2	GSS	CAPZB	EIF3E	LSS	SNU13
PSMA3	GSTT1	CORO1A	TARS1	MAP4	SDHA	CA8	RXRB	RRM2	F8A3	ARRB2	RAB10	CHI3L1	CCT5	ALDH1A3	SEC61B	GCLC	NPEPPS
PSMA4	SERPINB1	GDI1	VARS1	CANX	CORO1A	CTNNA1	ERCC5	SDC4	ATP2B4	CCKBR	UBE2M	GGT5	NES	QARS1	PPP4C	GCLM	HNRNPH2
S100P	SLC7A1	S100A7	EEF1G	PIK3R1	GDI1	CTNNB1	LAP3	TIA1	DGKA	DCTD	UBE2K	ARL2	HSPA13	RPL29	GABARAPL2	CD151	OXCT1
COL5A3	ALDH1B1	MAT2A	ZFP36	PSMB8	MAT2A	PHB1	S100A2	FMO3	CPT2	PYCR1	UBE2N	ARL3	IDH2	LGALS7B	MYL6	TRAPPC10	EIF3B
ITGA3	ALDH3A1	PRKAR1B	FKBP2	PSMB9	PRKAR1B	SERPINB6	GTF2E1	SLC6A6	DTYMK	GBP1	RAB14	MAP2K2	PITPNB	UQCRFS1	EIF4A1	PSMD8	FCGRT
ITGB8	POLR2B	RRM2	STOM	PSMA5	RRM2	NF2	GTF2E2	DNAJA1	RRM1	GBP2	ACTR3	ATP5F1C	ADGRE5	ATP5PO	RPS20	PRRC2A	BID
PTX3	NTS	SDC4	PON1	PSMB4	SDC4	RDX	TPP2	AKT1	LAMA2	ELF1	ACTR2	ATP6V1E1	MARCKSL1	LIMS1	PSMA6	GSS	ATP5MF
MSN	SDHA	TIA1	MAOB	PSMB6	TIA1	RPA3	IMPA1	AKT2	CCND1	STX2	ACTR1A	CPOX	PXN	CXCL12	S100A10	CCT5	MARS1
PTPN3	CORO1A	SLC6A6	YWHAQ	PSMB5	SLC6A6	RFC4	CCN2	UQCRC1	CHM	DSG3	COPS2	RPL4	MAPKAPK2	PREP	CDC42	NES	ITGA1
DDX6	GDI1	DNAJA1	MAPK3	GSTM2	DNAJA1	RFC2	EPHA2	HIBADH	KDELR1	CTH	RPS3A	NUDT1	DNASE1L1	ME1	DSTN	HSPA13	ARPP19
DNMT1	S100A7	AKT1	MARK3	ABCD3	AKT1	RFC1	PTPN6	ATIC	NR2F2	ICAM3	PSME3	LONP1	ALDH9A1	PIP4K2A	GMFB	CSNK1A1	ATP5ME
U2AF2	MAT2A	AKT2	ARNT	ITPRID2	AKT2	RPL22	SHC1	HNRNPH3	EEF1B2	RPL9P9	RPL15	PGM1	RPL34	ARCN1	RAB8A	IDH2	EIF6
RPL13	PRKAR2B	UQCRC1	RPL10	LOX	UQCRC1	GTF2F1	MPG	HNRNPH1	ATP5PB	ACSL1	RPL27	PPP1CC	RPIA	LSS	SPCS3	PITPNB	CTBP2
CHML	RRM2	HIBADH	RPA1	NDUFS1	HIBADH	SPR	KDM5A	YWHAB	ACP1	CDH5	ATP6V0D1	GNL1	LMAN1	GCLC	SRP54	ADGRE5	PRSS12
IVD	SDC4	ATIC	APEX1	POLD1	ATIC	PTGS2	TKT	SFN	ACAT1	KIF5B	PCBD1	SERPINB5	NASP	GCLM	RAB4B	MARCKSL1	JAM2
MGAT1	TIA1	HNRNPH3	CD82	SMARCA1	HNRNPH3	IDUA	CASP1	STIP1	TNC	CSTF2	RPL37A	POLR2I	FASN	CD151	RAB2A	PXN	TMEM33
HMGB2	DNAJA1	HNRNPH1	DCK	MAPK1	HNRNPH1	CBS	PML	S100A11	MYL9	LSP1	NCALD	SERPINF1	FNTA	PSMD8	RAB5B	MAPKAPK2	SYNJ2BP
PTBP1	AKT1	YWHAB	CAD	GCA	YWHAB	KRT9	TYK2	INPP5B	POLR2A	DUT	HSPE1	DLST	FNTB	PRRC2A	RAB10	ALDH9A1	RAB25
TARS1	AKT2	SFN	CALR	RXRB	SFN	IRS1	EEF1D	PRDX2	CDK2	ABCC1	SEC61A1	GPX4	CCT3	GSS	UBE2M	RPL34	CORO7
VARS1	UQCRC1	STIP1	MAP4	ERCC5	STIP1	AGL	MARCKS	ARRB2	GRK2	ABCD1	LYZ	SRP14	ARRB1	CCT5	UBE2K	RPIA	NUP107
EEF1G	HIBADH	S100A11	CANX	RBL1	S100A11	MYH9	GNA11	GK	MCM3	MAN1A1	VBP1	TGFBR2	TUFM	PTDSS1	UBE2N	LMAN1	GSDMD
FKBP2	ATIC	INPP5B	PIK3R1	GRN	INPP5B	MYH10	ALDH4A1	DCTD	NFYB	KDELR2	STXBP1	NUP62	ALDH7A1	NES	RAB14	NASP	EPPK1
CNTFR	HNRNPH3	PRDX2	PSMB8	LAP3	PRDX2	COPB2	PBLD	PYCR1	MPST	MCM4	B2M	HPCAL1	INPP1	HSPA13	ACTR3	FASN	MTPN
STOM	HNRNPH1	ARRB2	PSMB9	HSD11B1	ARRB2	SOAT1	ERP29	GBP1	LAMA1	MCM5	DAD1	TAGLN2	SRP9	IDH2	ACTR2	FNTA	RAB15
PON1	YWHAB	OTX1	PSMA5	GJB2	OTX1	ADD1	PRDX6	GBP2	RPS12	MCM7	NPC2	TALDO1	UBE2A	PITPNB	ACTR1A	FNTB	GNG2
MAOB	SFN	DCTD	PSMB4	S100A2	DCTD	BSG	BLVRB	ELF1	BRD2	GALNS	COPZ1	SNCA	PCYT1A	ADGRE5	COPS2	CCT3	ARPC4
YWHAQ	STIP1	PYCR1	PSMB6	GTF2E1	PYCR1	FUS	PRDX5	HPD	FAS	SDC2	UFM1	ETFB	AARS1	MARCKSL1	RPS3A	MRPL19	CD81
MAPK3	S100A11	GBP2	PSMB5	GTF2E2	ELF1	NUP214	DDT	GTF2H1	YY1	SHMT2	DCAF7	COIL	CARS1	PXN	PSME3	ARRB1	TPI1
MARK3	INPP5B	ELF1	GSTM2	PCSK6	GTF2H1	DEK	GCHFR	RPL9P9	DNAJB1	EVI2B	NUTF2	GGCX	HARS2	ALDH9A1	RPL15	TUFM	EIF3E
ARNT	PRDX2	GTF2H1	ABCD3	TPP2	CTH	CHKA	PRDX3	ACSL1	DNAJB2	EPHX2	HNRNPK	ITGAE	SARS1	RPL34	RPL27	ALDH7A1	SEC61B
CERS1	ARRB2	DSG3	ITPRID2	IMPA1	RPL9P9	PPM1A	ATP5F1D	KIF5B	ATP5F1A	HSPA1L	YWHAG	LIPA	PPM1F	RPIA	ATP6V0D1	INPP1	PPP4C
RPL10	OTX1	CTH	NDUFS1	EPHA2	ACSL1	AHR	RPL12	CSTF2	PSMA1	HSPA4	RRAS2	ATP6V1A	CASP4	LMAN1	PCBD1	PCYT1A	GABARAPL2
RPA1	DCTD	RPL9P9	POLD1	EPHB2	KIF5B	KRT2	ECHS1	DUT	PSMA2	MPI	RPS7	HSPA9	PSMB3	NASP	RPL37A	AARS1	MYL6
APEX1	PYCR1	ACSL1	MAPK1	PTPN6	CSTF2	HMGCL	CMPK1	ABCC1	PSMA3	GPC1	PPP1CA	EIF4A3	PSMB2	FASN	NCALD	CARS1	EIF4A1
CD82	ELF1	KIF5B	GCA	SHC1	DUT	PSMC2	PEBP1	CKS2	PSMA4	PFN2	PPP1CB	RPS19	ACADVL	FNTA	HSPE1	HARS2	RPS20
DCK	GTF2H1	CSTF2	RXRB	MPG	ABCC1	GGT5	PDIA3	MAN1A1	S100P	CTNNA1	PSMC1	RPL3	VPS41	FNTB	SEC61A1	SARS1	PSMA6
CAD	DSG3	DUT	ERCC5	ARID4A	CKS2	ARL2	PPP2R1A	MCM4	ITGA3	CTNNB1	PSMC5	COL15A1	TMED10	DHPS	LYZ	PPM1F	S100A10
CALR	CTH	ABCC1	LAP3	KDM5A	ABCD1	ARL3	PPP2R1B	MCM5	ITGB8	PHB1	RPS8	COL18A1	RBM25	CCT3	VBP1	CASP4	CDC42
MAP4	RPL9P9	CKS2	S100A2	COL4A5	MAN1A1	MAP2K2	CDC27	MCM7	MSN	PTPN7	RPS15A	DDOST	EIF2B2	ARRB1	STXBP1	PSMB3	DSTN
CANX	ACSL1	ABCD1	GTF2E1	TKT	TTK	ATP5F1C	NKTR	GALNS	PTPN3	RDX	RPS16	FEN1	HINT1	TUFM	B2M	PSMB2	GMFB
PIK3R1	KIF5B	TTK	GTF2E2	CASP1	MCM4	ATP6V1E1	NMT1	SHMT1	DDX6	RPA3	YWHAE	CUX1	FHIT	ALDH7A1	DAD1	THBS3	RAB8A
PSMB8	CSTF2	MCM4	PCSK6	NOS1	MCM5	CPOX	HLA-F	SHMT2	DNMT1	RFC4	RPS14	MMP12	NUP153	INPP1	NPC2	COMP	SPCS3
PSMB9	DUT	MCM5	TPP2	SERPINB3	MCM7	RPL4	HMOX2	EPHX2	U2AF2	RFC2	RPS18	CAPG	RANBP2	SRP9	COPZ1	ACADVL	SRP54
PSMA5	ABCC1	MCM7	IMPA1	PML	GALNS	NUDT1	ADSS2	HSPA1L	RPL13	RFC1	RPS13	CAP2	NDUFV1	UBE2A	NUTF2	YLPM1	RAB4B
PSMB4	CKS2	GALNS	EPHA2	TYK2	RNASE4	LONP1	LRPAP1	HSPA4	IVD	RPL22	SNRPE	TXLNA	GSK3B	PCYT1A	HNRNPK	TMED10	RAB2A
PSMB6	ABCD1	CD68	EPHB2	EEF1D	SHMT1	PGM1	ADSL	MPI	MGAT1	GTF2F1	LSM6	CCT6A	GZMK	AARS1	YWHAG	RBM25	RAB5B
PSMB5	KDELR2	SHMT1	PTPN6	OAS2	SHMT2	PPP1CC	CLIP1	PRSS3	HMGB2	SPR	SNRPD1	NNMT	NT5C2	CARS1	RRAS2	NUMB	RAB10
GSTM2	TTK	SHMT2	SHC1	MARCKS	EPHX2	GNL1	SRI	GPC1	PTBP1	PTGS2	SNRPD2	PSMB10	SEPHS1	SARS1	RPS7	HINT1	UBE2M
ABCD3	MCM4	EPHX2	MPG	GNA11	HSPA1L	SERPINB5	GNA15	PFN2	TARS1	THBS2	SNRPD3	ADH7	SELENOP	PPM1F	PPP1CA	FHIT	UBE2K
ITPRID2	MCM5	HSPA1L	CRABP2	ALDH4A1	HSPA4	POLR2I	GSTT1	CA8	VARS1	IDUA	ARF6	RPL13A	CAMP	CASP4	PPP1CB	NUP153	UBE2N
NDUFS1	MCM7	HSPA4	ARID4A	ERP29	MPI	SERPINF1	SERPINB1	CTNNA1	EEF1G	SAA4	PSMC6	ARL1	GMPS	PSMB3	PSMC1	RANBP2	RAB14
POLD1	GALNS	MPI	TKT	PRDX6	PRSS3	DLST	ALDH1B1	CTNNB1	FKBP2	AGL	SELENOT	STAT3	MRE11	PSMB2	PSMC5	RGS3	ACTR3
SMARCA1	SHMT1	PRSS3	CASP1	BLVRB	GPC1	GPX4	ALDH3A1	PHB1	STOM	MYH9	RPL7A	PEX19	ENTPD1	MCM2	RPS8	TSC2	ACTR2
MAPK1	SHMT2	GPC1	PML	PRDX5	PFN2	SRP14	POLR2B	SERPINB6	PON1	MYH10	POLR2G	MDH1	HNMT	THBS3	RPS15A	NDUFV1	ACTR1A
GCA	EPHX2	PFN2	TYK2	DDT	CA8	NUP62	SDHA	NF2	ANXA13	COPB2	ETF1	MDH2	GNAQ	COMP	RPS16	GSK3B	COPS2
RXRB	HSPA1L	CA8	EEF1D	GCHFR	CTNNA1	HPCAL1	CORO1A	RDX	MAOB	SOAT1	RPS4X	RFC5	GNG10	ACADVL	UBE2H	NT5C2	RAP2B
ERCC5	HSPA4	CTNNA1	MARCKS	PRDX3	CTNNB1	FDFT1	GDI1	RPA3	YWHAQ	ADD1	RPL23A	RFC3	IDH3A	YLPM1	YWHAE	SEPHS1	RPS3A
RBL1	MPI	CTNNB1	GNA11	ATP5F1D	PCGF2	TAGLN2	MAT2A	RFC4	MAPK3	BSG	RPS6	HADHA	SULT1A1	TMED10	RPS14	SELENOP	PSME3
GRN	GPC1	PCGF2	ALDH4A1	RPL12	PHB1	TALDO1	PRKAR2B	RFC2	MARK3	FUS	VSNL1	EIF2S3	MMP14	RBM25	RPS23	CAMP	RPL15
PTPRM	PFN2	NOS2	ERP29	ECHS1	SERPINB6	SNCA	CPS1	RFC1	CALML3	NUP214	H4C16	CETN2	PPOX	NUMB	RPS18	GMPS	RPL27
LAP3	CTNNA1	PHB1	PRDX6	CMPK1	RDX	ETFB	RRM2	RPL22	ARNT	DEK	RAB1A	MNDA	GDI2	EIF2B2	RPS13	MRE11	ATP6V0D1
GJB2	CTNNB1	SERPINB6	BLVRB	PEBP1	RPA3	COIL	SDC4	GTF2F1	RPL10	MYH11	RAN	PTGDS	EMD	HINT1	SNRPE	ENTPD1	PCBD1
S100A2	PHB1	RDX	PRDX5	PDIA3	RFC4	GGCX	TIA1	SPR	RPA1	PPM1A	RPS15	BUD31	CPT1A	NUP153	SNRPD1	HNMT	RPL37A
GTF2E1	SERPINB6	RPA3	DDT	PPP2R1A	RFC2	LIPA	FMO3	PTGS2	APEX1	IGFALS	RPS24	UBA7	GATM	RANBP2	SNRPD2	GNAQ	NCALD
GTF2E2	RDX	RFC4	PRDX3	PPP2R1B	RFC1	ATP6V1A	SLC6A6	IDUA	CD82	HMGCL	RPS26	NAA10	SERPINB9	NDUFV1	SNRPD3	GNG10	HSPE1
PCSK6	RPA3	RFC2	ATP5F1D	CDC27	RPL22	HSPA9	DNAJA1	CBS	DCK	PSMC2	RPS28	PPP1R2	SERPINH1	NT5C2	TMSB4X	IDH3A	SEC61A1
TPP2	RFC4	RFC1	RPL12	PPIF	GTF2F1	EIF4A3	AKT1	KRT9	CAD	CHI3L1	FAU	CSK	PDLIM4	SEPHS1	ARF6	SULT1A1	LYZ
IMPA1	RFC2	RPL22	ECHS1	BDKRB2	SPR	RPS19	AKT2	IRS1	CALR	GGT5	RPL31	GARS1	VASP	SELENOP	PSMC6	MMP14	VBP1
EPHA2	RFC1	GTF2F1	CMPK1	NMT1	CBS	RPL3	UQCRC1	AGL	MAP4	ARL2	RPL10A	IARS1	DNM2	CAMP	SELENOT	PPOX	STXBP1
EPHB2	RPL22	SPR	PEBP1	HMOX2	KRT9	COL18A1	HIBADH	MYH9	CANX	ARL3	RPL11	ACTR1B	METAP2	MTHFS	RPL7A	GDI2	B2M
PTPN6	GTF2F1	HOXD12	PDIA3	ADSS2	IRS1	DDOST	ATIC	MYH10	PIK3R1	MAP2K2	RPL8	ECI1	NUDT2	GMPS	POLR2G	EMD	DAD1
SHC1	SPR	IDUA	PPP2R1A	LRPAP1	AGL	ANP32A	HNRNPH3	COPB2	PSMB8	ATP5F1C	PPIA	TMPO	RASSF2	MRE11	ETF1	CPT1A	NPC2
MPG	PTGS2	CBS	PPP2R1B	ADSL	MYH9	FEN1	HNRNPH1	SOAT1	PSMB9	ATP6V1E1	FKBP1A	STAT1	LRBA	ENTPD1	RPS4X	GATM	COPZ1
CRABP2	IDUA	KRT9	CDC27	CLIP1	MYH10	CUX1	YWHAB	ADD1	PSMA5	CPOX	GRB2	STAT6	BCAM	HNMT	RPL23A	SERPINB9	AP1S1
ARID4A	CBS	FBN2	CCND3	SRI	COPB2	CAPG	SFN	BSG	PSMB4	RPL4	TRA2B	STAT5A	PPT1	GNAQ	RPS6	SERPINH1	NUTF2
KDM5A	IRS1	IRS1	PPIF	GNA15	SOAT1	CAP2	STIP1	FUS	PSMB6	NUDT1	AP2B1	MTREX	RPL14	GNG10	VSNL1	PDLIM4	HNRNPK
COL4A5	AGL	AGL	NMT1	GSTT1	ADD1	IL6ST	S100A11	NUP214	PSMB5	LONP1	PPP3R1	AKR1C3	CCT8	IDH3A	H4C16	PEX5	YWHAG
TKT	MYH9	MYH9	HMOX2	SERPINB1	BSG	CEACAM6	INPP5B	DEK	GSTM2	PGM1	YWHAZ	ARHGAP25	CCT4	MMP14	RAB1A	VASP	RRAS2
CASP1	MYH10	MYH10	ADSS2	SLC7A1	FUS	TXLNA	PRDX2	CHKA	ABCD3	PPP1CC	PPP2R2A	MTOR	ANXA11	GDI2	RAN	DNM2	RPS7
NOS1	COPB2	COPB2	LRPAP1	ALDH1B1	NUP214	CCT6A	ARRB2	PPM1A	ITPRID2	TGFBR1	DYNLT1	PI4KA	FXR1	EMD	RAP1A	METAP2	PPP1CA
SERPINB3	SOAT1	SOAT1	ADSL	POLR2B	DEK	PSMB10	GK	AHR	NDUFS1	GNL1	RPL38	EPS15	RAB5C	CPT1A	RPS24	NUDT2	PPP1CB
PML	ADD1	ADD1	CLIP1	SDHA	PPM1A	ADH7	DCTD	KRT2	POLD1	SERPINB5	SKP1	CASP3	RAB7A	GATM	RPS25	LRBA	PSMC1
TYK2	ADD2	ADD2	SRI	CORO1A	IGFALS	PBX2	PYCR1	HMGCL	SMARCA1	POLR2I	RPS21	CASP2	RAB9A	SERPINB9	RPS28	BCAM	PSMC5
EEF1D	BSG	BSG	GNA15	GDI1	AHR	ARL1	GBP1	PSMC2	MAPK1	SERPINF1	EIF5A	RPS27	RAB13	SERPINH1	FAU	PPT1	RPS8
OAS2	FUS	FUS	GSTT1	S100A7	KRT20	MLH1	GBP2	GGT5	GCA	DLST	RACK1	HELZ	RAB27A	PDLIM4	RPL31	RPL14	RPS15A
MARCKS	NUP214	NUP214	SERPINB1	MAT2A	HMGCL	STAT3	ELF1	ARL2	RXRB	GPX4	UBE2I	LRPPRC	PLCD1	VASP	RPL10A	CCT8	RPS16
GNA11	DEK	DEK	SLC7A1	PRKAR1B	PSMC2	USP8	GTF2H1	ARL3	ERCC5	SRP14	YBX1	ACAA2	DAP3	DNM2	RPL11	CCT4	UBE2G1
ALDH4A1	MYH11	PPM1A	ALDH1B1	PRKAR2B	ARL2	PEX19	RPL9P9	MAP2K2	GRN	NUP62	SEC11A	RPL35	DUSP3	METAP2	RPL8	ANXA11	UBE2H
PBLD	PPM1A	AHR	ALDH3A1	CPS1	ARL3	MDH1	ACSL1	ATP5F1C	LAP3	HPCAL1	TPM4	WAS	SMARCA4	NUDT2	PPIA	FXR1	YWHAE
ERP29	IGFALS	KRT20	POLR2B	RRM2	MAP2K2	MDH2	CDH5	ATP6V1E1	GJB2	FDFT1	UBE2L3	CDKN2C	IDH3G	KNTC1	FKBP1A	RAB5C	RPS14
PRDX6	AHR	KRT2	SDHA	SDC4	ATP5F1C	RFC5	KIF5B	CPOX	S100A2	PIGA	ACTA1	PRCP	GALK1	LRBA	GRB2	RAB7A	RPS23
BLVRB	KRT2	HMGCL	CORO1A	TIA1	ATP6V1E1	RFC3	CSTF2	RPL4	GTF2E1	TAGLN2	TUBA4A	HTT	SSR4	BCAM	RAC1	RAB9A	RPS18
PRDX5	HMGCL	PSMC2	GDI1	DNAJA1	CPOX	HADHA	DUT	NUDT1	GTF2E2	TALDO1	TUBB4B	ECE1	BCAP31	PPT1	AP2B1	RAB13	RPS13
DDT	PSMC2	ARL2	S100A7	AKT1	RPL4	EIF2S3	ABCC1	LONP1	TPP2	SNCA	CSNK2A1	MTHFR	TPMT	RPL14	VAMP2	RAB27A	SNRPE
PRDX3	ARL2	ARL3	MAT2A	AKT2	NUDT1	CETN2	CKS2	PGM1	IMPA1	ETFB	PAFAH1B2	SLC1A4	RENBP	CCT8	PPP3R1	PLCD1	SNRPD1
ATP5F1D	ARL3	MAP2K2	PRKAR1B	UQCRC1	LONP1	ETV6	ABCD1	PPP1CC	EPHA2	GGCX	HBB	PAFAH1B1	MECP2	CCT4	YWHAZ	DAP3	SNRPD2
RPL12	MAP2K2	ATP5F1C	PRKAR2B	HIBADH	PGM1	EIF2D	MAN1A1	GNL1	EPHB2	LIPA	HBG1	MCAM	HCFC1	ANXA11	ERVK-7	DUSP3	SNRPD3
ECHS1	ATP5F1C	ATP6V1E1	CPS1	ATIC	PPP1CC	BUD31	MCM4	SERPINB5	PTPN6	ATP6V1A	HBG2	CRAT	CAV2	PAPOLA	PPP2R2A	SMARCA2	ARF6
CMPK1	ATP6V1E1	CPOX	RRM2	HNRNPH3	TGFBR1	UBA7	MCM5	SERPINF1	SHC1	HSPA9	HBA2	MATR3	ALDH3A2	RAB5C	DYNLT1	SMARCA4	PSMC6
PEBP1	CPOX	RPL4	SDC4	HNRNPH1	GNL1	NAA10	MCM7	DLST	MPG	EIF4A3	CXADR	MSH2	ALDH5A1	RAB7A	RPL38	IDH3G	SELENOT
PDIA3	RPL4	NUDT1	TIA1	YWHAB	SERPINB5	KDM5C	GALNS	GPX4	CRABP2	RPS19	SIRPA	BTD	HSD17B4	RAB9A	SKP1	GALK1	RPL7A
PPP2R1A	NUDT1	LONP1	SLC6A6	SFN	SERPINF1	PPP1R2	SHMT1	SCNN1A	ARID4A	RPL3	EIF4G2	GPD2	PSMD7	RAB13	RPS21	SSR4	POLR2G
PPP2R1B	LONP1	PGM1	DNAJA1	STIP1	DLST	CSK	SHMT2	SRP14	KDM5A	COL15A1	GTF2I	SSR1	SUOX	RAB27A	EIF5A	BCAP31	ETF1
CDC27	PGM1	PPP1CC	AKT1	S100A11	GPX4	PNPLA4	EPHX2	NUP62	TKT	COL18A1	CCT2	MAGEA9B	STAT5B	DAP3	RACK1	TPMT	RPS4X
WEE1	PPP1CC	TGFBR1	AKT2	L1CAM	SRP14	GARS1	HSPA1L	HPCAL1	CASP1	DDOST	RAE1	PTPN9	USP11	DUSP3	UBE2I	RENBP	RPL23A
PPIF	TGFBR1	GNL1	UQCRC1	PRDX2	NUP62	IARS1	HSPA4	FDFT1	SERPINB3	FEN1	GSTO1	ZAP70	CLCN7	IDH3G	YBX1	MECP2	RPS6
BDKRB2	GNL1	SERPINB5	HIBADH	ARRB2	HPCAL1	PRKCI	MPI	TAGLN2	PML	CUX1	PRKDC	SYK	VAMP7	GALK1	SEC11A	HCFC1	H4C16
NKTR	SERPINB5	POLR2I	ATIC	DCTD	FDFT1	ACTR1B	GPC1	TALDO1	EEF1D	CAPG	ADARB1	RANBP1	RPS6KA3	SSR4	CSNK2B	CAV2	RAB1A
NMT1	POLR2I	SERPINF1	HNRNPH3	PYCR1	PIGA	ECI1	PFN2	SNCA	OAS2	CAP2	GPLD1	NAMPT	ADCY7	BCAP31	TPM4	ALDH3A2	RAN
HMOX2	SERPINF1	DLST	HNRNPH1	ELF1	TAGLN2	TMPO	CA8	ETFB	MARCKS	TXLNA	LCN2	AFM	HDGF	TPMT	UBE2L3	HSD17B4	RAP1A
ADSS2	DLST	GPX4	CASP14	HPD	TALDO1	STAT1	CTNNA1	COIL	GNA11	CCT6A	IFI35	PSMC4	LUM	RENBP	TUBA4A	PSMD7	RPS15
LRPAP1	GPX4	SRP14	YWHAB	GTF2H1	SNCA	STAT6	CTNNB1	GGCX	ALDH4A1	NNMT	NUCB2	TSFM	PRELP	MECP2	TUBB4B	SUOX	RPS24
ADSL	SRP14	NUP62	SFN	STX2	ETFB	MTREX	PHB1	LIPA	PBLD	PSMB10	S100A12	PPIC	CNN1	HCFC1	CSNK2A1	STAT5B	RPS25
CLIP1	NUP62	HPCAL1	STIP1	DSG3	COIL	AKR1C3	SERPINB6	ATP6V1A	ERP29	ARL1	BASP1	VDAC2	NDUFA8	CAV2	PAFAH1B2	USP11	FAU
SRI	HPCAL1	FDFT1	S100A11	CTH	GGCX	PIK3CA	NF2	HSPA9	PRDX6	STAT3	IGLV3-21	ACADSB	HNRNPA3	ALDH3A2	HBB	CLCN7	RPL31
GNA15	FDFT1	PIGA	L1CAM	RPL9P9	ATP6V1A	PIK3CB	RDX	EIF4A3	BLVRB	USP8	MRPS25	CBX5	PGD	ALDH5A1	HBG2	VAMP7	RPL10A
GSTT1	PIGA	TAGLN2	INPP5B	ACSL1	HSPA9	MTOR	RPA3	RPS19	PRDX5	PEX19	MRPS35	USP5	HNRNPM	HSD17B4	HBA2	RPS6KA3	RPL11
SERPINB1	TAGLN2	TALDO1	PRDX2	KIF5B	EIF4A3	PI4KA	RFC4	RPL3	DDT	MDH1	MRPS36	MAPK8	KPNA1	PSMD7	CXADR	HDGF	RPL8
SLC7A1	TALDO1	SNCA	ARRB2	CSTF2	IGHMBP2	EPS15	RFC2	COL18A1	GCHFR	MDH2	MRPS15	MAPK9	NCBP2	SUOX	SIRPA	LUM	PPIA
ALDH1B1	SNCA	ETFB	OTX1	DUT	RPS19	CASP3	RFC1	DDOST	PRDX3	RFC5	SARNP	MAP2K4	RAP1GDS1	STAT5B	RBM6	PRELP	FKBP1A
POLR2B	ETFB	COIL	DCTD	ABCC1	RPL3	CASP2	RPL22	ANP32A	ATP5F1D	RFC3	RBP5	MKI67	POLR2H	USP11	EIF4G2	CNN1	GRB2
NTSR1	COIL	GGCX	PYCR1	CKS2	COL18A1	RPS27	GTF2F1	FEN1	RPL12	HADHA	LACTB	PHKA2	MAP2K6	VAMP7	GTF2I	NDUFA8	AP2B1
SDHA	GGCX	LIPA	ELF1	ABCD1	DDOST	FRK	SPR	CUX1	ECHS1	EIF2S3	TXNL4A	RANGAP1	ARHGDIA	RPS6KA3	CCT2	HNRNPA3	PPP3R1
CORO1A	LIPA	ATP6V1A	HPD	MAN1A1	ANP32A	HELZ	IDUA	CAPG	CMPK1	CETN2	CBX1	RECQL	ARHGDIB	AKR1D1	SLC35A1	PGD	YWHAZ
GDI1	ATP6V1A	HSPA9	GTF2H1	KDELR2	FEN1	NCAPD3	KRT9	CAP2	PEBP1	EIF2D	ARF5	NOP2	AGFG1	HDGF	KRT85	HNRNPM	DYNLT1
MAT2A	HSPA9	EIF4A3	DSG3	TTK	CUX1	RBM34	IRS1	IL6ST	PDIA3	CD200	RHOG	CRK	HNRNPF	CDR1	RAE1	KPNA2	RPL38
PRKAR1B	EIF4A3	IGHMBP2	CTH	MCM4	MMP12	LRPPRC	AGL	CEACAM6	PPP2R1A	MNDA	RPL19	CRKL	STAT2	LUM	GSTO1	KPNA1	SKP1
PRKAR2B	IGHMBP2	RPS19	RPL9P9	MCM5	CAPG	ACAA2	MYH9	TXLNA	PPP2R1B	PTGDS	DAB2	BAG6	GTF2A1	PRELP	PRKDC	NCBP2	RPS21
CPS1	RPS19	RPL3	ACSL1	MCM7	CEACAM6	RPL35	MYH10	CCT6A	CDC27	UBA7	FBLN2	GSTM5	SMS	CNN1	ADAM17	RAP1GDS1	EIF5A
RRM2	RPL3	COL18A1	KIF5B	GALNS	TXLNA	PRCP	COPB2	PSMB10	CCND3	NAA10	HSPG2	NSF	HK2	NDUFA8	SRPX	POLR2H	RACK1
SDC4	COL18A1	DDOST	CSTF2	SHMT1	CCT6A	HTT	SOAT1	ADH7	PPIF	PPP1R2	EFNB1	CDKN1B	HK3	HNRNPA3	CRADD	MAP2K6	UBE2I
TIA1	MPV17	ANP32A	DUT	SHMT2	PSMB10	ECE1	ADD1	ARL1	NKTR	CSK	ATP11A	MAP2K3	MRPL12	PGD	HLA-DRB3	ARHGDIA	YBX1
FMO4	DDOST	FEN1	ABCC1	EPHX2	ARL1	MTHFR	BSG	MLH1	NMT1	GARS1	CYCS	BRCC3	DGKQ	HNRNPM	IFI35	ARHGDIB	SEC11A
SLC6A6	FEN1	CUX1	CKS2	HSPA1L	MLH1	SLC1A1	FUS	STAT3	HMOX2	IARS1	MPP1	RPL27A	THOP1	KPNA2	NUCB2	AGFG1	TPM4
DNAJA1	CUX1	CAPG	ABCD1	HSPA4	STAT3	SLC1A4	NUP214	USP8	ADSS2	ACTR1B	TFAM	RPL5	CAPZA1	KPNA1	ABAT	HNRNPF	UBE2L3
AKT1	CAPG	CAP2	MAN1A1	MPI	USP8	PAFAH1B1	DEK	PEX19	LRPAP1	ECI1	PITPNA	RPL21	CRIP2	NCBP2	S100A12	STAT2	TUBA4A
AKT2	CAP2	TXLNA	KDELR2	GPC1	PEX19	CRAT	HNF1B	MDH1	ADSL	TMPO	SLC25A3	RPL28	NUP98	RAP1GDS1	BASP1	GTF2A1	PAFAH1B2
UQCRC1	TXLNA	CCT6A	TTK	PFN2	MDH1	CTSO	CHKA	MDH2	CLIP1	STAT1	HDLBP	RPS9	BLVRA	POLR2H	MRPS35	ZNF132	HBB
HIBADH	CCT6A	PSMB10	MCM4	CTNNA1	MDH2	MATR3	PPM1A	RFC5	SRI	STAT6	CDK6	RPS5	SLC25A1	ARHGDIA	MRPS36	SMS	HBA2
ATIC	PSMB10	ADH7	MCM5	CTNNB1	RFC5	MSH2	AHR	RFC3	GNA15	STAT5A	PURA	RPS10	PPP5C	ARHGDIB	SARNP	HK2	IGBP1
HNRNPH3	ADH7	PBX1	MCM7	NOS2	RFC3	BTD	KRT2	HADHA	GSTT1	MTREX	CDC42EP1	MAP1B	ARFIP2	AGFG1	LACTB	HK3	SIRPA
HNRNPH1	RPL13A	ARL1	GALNS	PHB1	HADHA	GPD2	HMGCL	EIF2S3	SERPINB1	AKR1C3	CLTC	GNPDA1	ARFIP1	HNRNPF	TXNL4A	MRPL12	EIF4G2
YWHAB	ARL1	MLH1	SHMT1	SERPINB6	EIF2S3	SSR1	PSMC2	CETN2	SLC7A1	ARHGAP25	FKBP3	NEDD4	ACLY	STAT2	CBX1	THOP1	GTF2I
SFN	MLH1	STAT3	SHMT2	NF2	ID1	ALDH3B1	GGT5	ETV6	ALDH1B1	PIK3CB	REEP5	YAP1	SUCLG1	GTF2A1	ARF5	CAPZA1	CCT2
STIP1	STAT3	USP8	EPHX2	RDX	ETV3	PTPN9	ARL2	EIF2D	ALDH3A1	MTOR	SORD	UTRN	MVD	MSH6	RHOG	CRIP2	KRT85
S100A11	USP8	PEX19	HSPA1L	RPA3	CETN2	SYK	ARL3	BUD31	POLR2B	PI4KA	HNRNPU	IQGAP1	PGGT1B	KIF11	RPL19	NUP98	GSTO1
L1CAM	PEX19	MDH1	HSPA4	RFC4	EIF2D	RANBP1	MAP2K2	UBA7	SDHA	EPS15	IRF9	HAAO	RABGGTB	SMS	MXRA7	BLVRA	PRKDC
INPP5B	MDH1	MDH2	MPI	RFC2	BUD31	NAMPT	ATP5F1C	NAA10	CORO1A	CASP3	SPTBN1	GYG1	COPB1	HK2	DAB2	SLC25A1	SRPX
PRDX2	MDH2	RFC5	GPC1	RFC1	NAA10	PSMC4	ATP6V1E1	KDM5C	GDI1	RPS27	TIAL1	STT3A	COPA	HK3	FBLN2	PPP5C	ADARB1
ARRB2	RFC5	RFC3	PFN2	RPL22	KDM5C	NKX2-1	CPOX	PPP1R2	MAT2A	LRPPRC	SET	RABIF	CTSC	MRPL12	HSPG2	ARFIP2	GPLD1
OTX1	RFC3	HADHA	CA8	GTF2F1	HNF4A	TSFM	RPL4	CSK	PRKAR1B	ACAA2	SCN7A	PLA2G4A	CRYBB1	THOP1	ARHGAP4	ARFIP1	LCN2
DCTD	HADHA	EIF2S3	CTNNA1	SPR	PPP1R2	PPIC	NUDT1	PNPLA4	PRKAR2B	WAS	SRSF2	CAPZA2	AP2S1	AKR1C2	EFNB1	ACLY	IFI35
PYCR1	EIF2S3	ETV3	CTNNB1	PTGS2	CSK	VDAC2	LONP1	GARS1	CPS1	CDKN2A	GALK2	CAPZB	ITGA8	CAPZA1	ATP11A	SUCLG1	NUCB2
ELF1	CETN2	CETN2	NOS2	THBS2	PNPLA4	ACADSB	PGM1	IARS1	RRM2	PRCP	AMPD3	ALDH1A3	SMTN	CRIP2	CYCS	MVD	ABAT
HPD	ETV6	ETV6	PHB1	THBS4	GARS1	CBX5	PPP1CC	PRKCI	SDC4	HTT	CTBS	QARS1	SLC16A1	NUP98	MPP1	PGGT1B	S100A12
GTF2H1	EIF2D	EIF2D	SERPINB6	IDUA	IARS1	USP5	GNL1	ACTR1B	TIA1	ECE1	CAP1	RPL29	IST1	BLVRA	TFAM	COPB1	BASP1
STX2	BUD31	BUD31	NF2	CBS	PRKCI	MAPK8	SERPINB5	ECI1	SLC6A6	MTHFR	IFITM3	LGALS7B	SEC24C	SLC25A1	PITPNA	COPA	IGLV3-21
DSG3	NAA10	NAA10	RDX	IRS1	ACTR1B	MAPK9	POLR2I	TMPO	DNAJA1	SLC1A4	DR1	UQCRFS1	SUB1	PPP5C	SLC25A3	CTSC	MRPS35
CTH	KDM5C	KDM5C	RPA3	AGL	ECI1	MAP2K4	SERPINF1	STAT1	AKT1	PAFAH1B1	EXOSC10	ATP5PO	CLNS1A	ARFIP2	HDLBP	AP2S1	MRPS36
RPL9P9	PPP1R2	PPP1R2	RFC4	MYH9	TMPO	MKI67	DLST	STAT6	AKT2	MCAM	PFKP	LIMS1	RARS1	ARFIP1	CDK6	SMTN	SARNP
ACSL1	CSK	CSK	RFC2	MYH10	STAT1	PHKA2	GPX4	MTREX	UQCRC1	CRAT	EWSR1	PREP	CACNA2D1	ACLY	PURA	SLC16A1	LACTB
KIF5B	PNPLA4	PNPLA4	RFC1	TIE1	STAT6	PHKA1	HSD17B2	AKR1C3	HIBADH	MATR3	PLCB3	ME1	YARS1	METAP1	CLTC	IST1	TXNL4A
CSTF2	GARS1	GARS1	RPL22	COPB2	MTREX	RANGAP1	SCNN1A	PIK3CA	ATIC	MSH2	ROR1	IREB2	USP14	SUCLG1	HSF1	SEC24C	CBX1
DUT	IARS1	IARS1	GTF2F1	ACTN2	AKR1C3	RECQL	SRP14	PIK3CB	HNRNPH3	GRK6	TAGLN	RFX5	PRKAG1	MVD	FKBP3	SUB1	ARF5
ABCC1	PRKCI	PRKCI	SPR	SOAT1	PIK3CA	NOP2	TGFBR2	MTOR	HNRNPH1	BTD	NAAA	PIP4K2A	HSPA2	PGGT1B	PLCB2	RARS1	RHOG
CKS2	ACTR1B	ACTR1B	THBS2	ADD1	PIK3CB	ATRX	NUP62	PI4KA	YWHAB	GPD2	SP2	SOX2	BCAT1	RABGGTB	REEP5	CACNA2D1	RPL19
ABCD1	ECI1	ECI1	THBS4	ADD2	MTOR	CRK	HPCAL1	EPS15	SFN	SSR1	RHAG	ARCN1	ATP1B3	COPB1	SORD	YARS1	DAB2
MAN1A1	TMPO	TMPO	IDUA	BSG	PI4KA	CRKL	FDFT1	CASP3	STIP1	ALDH3B1	GUCY1A1	LSS	RAD23A	COPA	HNRNPU	USP14	FBLN2
KDELR2	STAT1	STAT1	CBS	FUS	EPS15	MTIF2	TAGLN2	CASP2	S100A11	PTPN9	GUCY1B1	PPP3CC	RAD23B	CTSC	IRF9	PRKAG1	HSPG2
TTK	MTREX	STAT6	KRT9	NUP214	CASP3	BAG6	TALDO1	RPS27	INPP5B	ZAP70	OGDH	GCLC	EPHB3	AP2S1	SPTBN1	HSPA2	XIAP
MCM4	AKR1C3	MTREX	IRS1	DEK	CASP2	NSF	SNCA	FRK	PRDX2	SYK	CENPE	GCLM	NAGLU	HCCS	TIAL1	BCAT1	ARHGAP4
MCM5	PIK3CA	AKR1C3	AGL	MYH11	RPS27	MAP2K3	ETFB	HELZ	ARRB2	RANBP1	ALDH6A1	TRAPPC10	GALC	TTC3	SET	ATP1B3	EFNB1
MCM7	PIK3CB	PIK3CA	MYH9	CHKA	FRK	BRCC3	COIL	NCAPD3	GK	NAMPT	CYP27A1	PSMD8	AK2	SMTN	SCN7A	RAD23A	ATP2C1
GALNS	MTOR	PIK3CB	MYH10	PPM1A	NCAPD3	RPL27A	GGCX	RBM34	OTX1	AFM	SP3	SERPINB4	ALDH18A1	PLAAT3	SRSF2	RAD23B	ATP11A
CD68	PI4KA	MTOR	COPB2	IGFALS	RBM34	RPL5	LIPA	LRPPRC	DCTD	PSMC4	MAP2K1	PRRC2A	NAPA	SLC16A1	GALK2	GALC	CYCS
SHMT1	EPS15	PI4KA	ACTN2	AHR	LRPPRC	RPL21	ATP6V1A	ACAA2	PYCR1	TSFM	TEK	GSS	ADPRH	IST1	CTBS	AK2	MPP1
SHMT2	CASP3	EPS15	SOAT1	KRT2	ACAA2	RPL28	HSPA9	RPL35	GBP1	PPIC	FKBP4	CCT5	AIF1	SEC24C	CAP1	ALDH18A1	TFAM
EPHX2	CASP2	CASP3	ADD1	HMGCL	RPL35	RPS9	EIF4A3	PRCP	GBP2	VDAC2	NUCB1	PTDSS1	EIF5	SUB1	FLI1	NAPA	PITPNA
HSPA1L	RPS27	CASP2	ADD2	PSMC2	PRCP	RPS5	IGHMBP2	HTT	ELF1	ACADSB	RPL6	NES	PSMD4	CLNS1A	HMGCS1	ADPRH	SLC25A3
HSPA4	ABL2	RPS27	BSG	ARL2	HTT	RPS10	RPS19	ECE1	GTF2H1	CBX5	AKAP12	HSPA13	DRG2	RARS1	IFITM3	AIF1	HDLBP
MPI	FRK	FRK	FUS	ARL3	MTHFR	MAP1B	RPL3	MTHFR	DSG3	USP5	SLC25A11	CSNK1A1	PLTP	CACNA2D1	DR1	EIF5	GTF2B
PRSS3	HELZ	HELZ	NUP214	MAP2K2	SLC1A4	GNPDA1	COL18A1	SLC1A1	CTH	MAPK9	DST	CSNK1D	CSE1L	YARS1	EXOSC10	PSMD4	CDK6
GPC1	NCAPD3	NCAPD3	DEK	ATP5F1C	PAFAH1B1	NEDD4	DDOST	SLC1A4	RPL9P9	MAP2K4	CAV1	IDH2	VCP	USP14	OTUD4	DRG2	PURA
PFN2	RBM34	RBM34	MYH11	ATP6V1E1	CRAT	YAP1	ANP32A	PAFAH1B1	ACSL1	MKI67	LMNB2	PITPNB	MFAP1	PRKAG1	PFKP	GEM	CDC42EP1
CTNNA1	LRPPRC	LRPPRC	PPM1A	CPOX	MATR3	UTRN	FEN1	MCAM	CDH5	PHKA2	MVK	ADGRE5	MFAP4	HSPA2	EWSR1	RRAD	CLTC
CTNNB1	RPL35	ACAA2	IGFALS	RPL4	MSH2	IQGAP1	CUX1	CRAT	KIF5B	RANGAP1	TAP1	POLD2	HADHB	BCAT1	PLCB3	PLTP	NFKB2
PHB1	PRCP	PRCP	AHR	NUDT1	GPD2	HAAO	CAPG	CTSO	CSTF2	RECQL	UBXN1	MARCKSL1	AQP4	ATP1B3	ROR1	CSE1L	FKBP3
SERPINB6	HTT	HTT	KRT2	LONP1	SSR1	STT3A	CAP2	MATR3	LSP1	NOP2	GBE1	PXN	MANF	RAD23A	TAGLN	VCP	PLCB2
NF2	ECE1	ECE1	HMGCL	PGM1	ALDH3B1	RABIF	IL6ST	MSH2	DUT	CRK	EIF4G1	NR2C2	NCKAP1L	RAD23B	NAAA	MFAP1	REEP5
RDX	MTHFR	MTHFR	PSMC2	PPP1CC	MAGEA1	PLA2G4A	CEACAM6	BTD	ABCC1	CRKL	TLE3	MAPKAPK2	AFDN	NAGLU	GUCY1A1	MFAP4	SORD
RPA3	SLC1A3	SLC1A3	GGT5	TGFBR1	MAGEA9B	CAPZA2	TXLNA	GPD2	CKS2	BAG6	HGFAC	DNASE1L1	NAP1L1	GALC	GUCY1B1	HADHB	HNRNPU
RFC4	SLC1A1	SLC1A1	ARL2	GNL1	MAGEA12	CAPZB	CCT6A	SSR1	ABCD1	NSF	GLO1	ALDH9A1	CASP7	AK2	OGDH	AQP4	SPTBN1
RFC2	SLC1A4	SLC1A4	ARL3	SERPINB5	PTPN9	ALDH1A3	PSMB10	ALDH3B1	MAN1A1	CDKN1B	SSBP1	RPL34	CASP6	ALDH18A1	ALDH6A1	GDF10	TIAL1
RFC1	PAFAH1B1	PAFAH1B1	MAP2K2	POLR2I	RANBP1	QARS1	ADH7	PTPN9	KDELR2	MAP2K3	YWHAH	RPIA	ADK	NAPA	CYP27A1	MANF	SET
RPL22	MCAM	MCAM	ATP5F1C	SERPINF1	NAMPT	RPL29	PBX2	SYK	TTK	BRCC3	PLP2	LMAN1	ADAR	AIF1	MAP2K1	NCKAP1L	SCN7A
GTF2F1	CRAT	CRAT	ATP6V1E1	DLST	KIR2DL1	LGALS7B	RPL13A	RANBP1	MCM4	RPL27A	PTPN12	NASP	LAMB2	EIF5	TEK	AFDN	SRSF2
SPR	MATR3	MATR3	CPOX	GPX4	PSMC4	UQCRFS1	ARL1	NAMPT	MCM5	RPL5	CLC	FASN	CDH11	SLC12A2	FKBP4	NAP1L1	GALK2
PTGS2	MSH2	MSH2	RPL4	SRP14	TSFM	ATP5PO	MLH1	PSMC4	MCM7	RPL21	PTK2	FNTA	CDH13	PSMD4	NUCB1	CASP7	AMPD3
THBS2	BTD	BTD	NUDT1	TGFBR2	PPIC	PREP	STAT3	NKX2-1	GALNS	RPL28	PRKCZ	FNTB	TPD52	DRG2	RPL6	GP2	AMPD2
IDUA	GPD2	GPD2	LONP1	NUP62	VDAC2	ME1	USP8	TSFM	SHMT1	RPS9	PRKCD	DHPS	SEC13	APOC4	TOP2B	ADK	CTBS
CBS	SSR1	SSR1	PGM1	HPCAL1	ACADSB	IREB2	PEX19	PPIC	SHMT2	RPS5	CALD1	CCT3	SNU13	PLTP	AKAP12	ADAR	CAP1
IRS1	PTPN9	PTPN9	PPP1CC	FDFT1	CBX5	RFX5	MDH1	VDAC2	EPHX2	RPS10	COL14A1	MRPL19	NPEPPS	CSE1L	SLC25A11	LAMB2	IFITM3
AGL	SYK	RANBP1	GNL1	PIGA	USP5	PIP4K2A	MDH2	ACADSB	HSPA1L	MAP1B	ITIH3	ARRB1	HNRNPH2	VCP	DST	CDH6	DR1
MYH9	RANBP1	NAMPT	SERPINB5	TAGLN2	MKI67	SOX2	RFC5	CBX5	HSPA4	GNPDA1	PTPN11	TUFM	OXCT1	MFAP1	CAV1	CDH11	EXOSC10
MYH10	NAMPT	PSMC4	POLR2I	TALDO1	PHKA2	SOX9	RFC3	USP5	MPI	NEDD4	KDSR	ALDH7A1	EIF3B	MFAP4	ACY1	CDH13	PFKP
COPB2	PSMC4	TSFM	SERPINF1	SNCA	SLC15A1	ARCN1	HADHA	MAPK8	GPC1	YAP1	GFPT1	INPP1	FCGRT	HADHB	TGFBR3	TPD52	EWSR1
SOAT1	TSFM	ABCG1	DLST	ETFB	RANGAP1	LSS	EIF2S3	MAPK9	PFN2	UTRN	EXOSC9	SRP9	BID	MANF	LMNB2	SEC13	PLCB3
ADD1	ABCG1	PPIC	GPX4	COIL	RECQL	GCLC	ETV3	MAP2K4	CA8	IQGAP1	AOX1	UBE2A	ATP5MF	NCKAP1L	ROM1	SNU13	TAGLN
ADD2	PPIC	VDAC2	SRP14	GGCX	NOP2	GCLM	BCL6	MKI67	CTNNA1	HAAO	PSME1	PCYT1A	RRP1	AFDN	MVK	NPEPPS	NAAA
BSG	VDAC2	ACADSB	NUP62	LIPA	ATRX	TRAPPC10	CETN2	PHKA2	CTNNB1	GYG1	GABPA	AARS1	MARS1	NAP1L1	TAP1	HNRNPH2	GUCY1A1
FUS	ACADSB	CBX5	HPCAL1	ATP6V1A	CRK	PSMD8	ETV6	PHKA1	PHB1	STT3A	FMR1	CARS1	ITGA1	CASP7	UBXN1	OXCT1	DHODH
NUP214	CBX5	USP5	FDFT1	HSPA9	CRKL	PRRC2A	EIF2D	RANGAP1	SERPINB6	PLA2G4A	FMOD	HARS2	ARPP19	CASP6	GBE1	EIF3B	GUCY1B1
DEK	USP5	MAPK9	PIGA	EIF4A3	MTIF2	GSS	BUD31	RECQL	NF2	CAPZA2	PRDX1	SARS1	ATP5ME	ADK	EIF4G1	FCGRT	OGDH
MYH11	MAPK8	MAP2K4	TAGLN2	IGHMBP2	BAG6	CCT5	UBA7	NOP2	RDX	CAPZB	RPL18	PPM1F	EIF6	ADAR	KRT17	BID	ALDH6A1
PPM1A	MAPK9	MKI67	TALDO1	RPS19	NSF	PTDSS1	NAA10	ATRX	RPA3	ALDH1A3	C1QBP	CASP4	CTBP2	LAMB2	TLE3	ATP5MF	CYP27A1
IGFALS	MAP2K4	PHKA2	SNCA	RPL3	MAP2K3	HSPA13	KDM5C	CRK	RFC4	QARS1	CKAP4	PSMB3	NDUFA6	CDH11	GLO1	MARS1	MAP2K1
KRT2	MKI67	PHKA1	ETFB	COL18A1	BRCC3	CSNK1A1	PPP1R2	CRKL	RFC2	RPL29	ENPEP	PSMB2	CFAP298	CDH13	SSBP1	ITGA1	TEK
HMGCL	PHKA2	RANGAP1	COIL	DDOST	RPL27A	CSNK1D	CSK	MTIF2	RFC1	LGALS7B	TJP1	MCM2	TMEM33	TPD52	YWHAH	ARPP19	FKBP4
PSMC2	PHKA1	RECQL	GGCX	FEN1	RPL5	IDH2	PNPLA4	BAG6	RPL22	UQCRFS1	DPT	COMP	SYNJ2BP	SEC13	PLP2	AP1S2	NUCB1
GJC1	RANGAP1	NOP2	LIPA	CUX1	RPL21	PITPNB	GARS1	NSF	GTF2F1	ATP5PO	KHDRBS1	ACADVL	GEMIN4	SNU13	PTPN12	ATP5ME	RPL6
ARL2	RECQL	ATRX	ATP6V1A	CAPG	RPL28	ADGRE5	IARS1	CDKN1B	SPR	LIMS1	BAX	YLPM1	RAB25	NPEPPS	PTK2	EIF6	TOP2B
ARL3	NOP2	CRK	HSPA9	CAP2	RPS9	POLD2	PRKCI	MAP2K3	PTGS2	PREP	KLC1	ACOT2	CORO7	HNRNPH2	PRKCD	CTBP2	AKAP12
MAP2K2	ATRX	CRKL	EIF4A3	IL6ST	RPS5	MARCKSL1	ACTR1B	BRCC3	IDUA	ME1	LRP1	VPS41	NUP107	OXCT1	CALD1	NDUFA6	SLC25A11
ATP5F1C	CRK	MTIF2	IGHMBP2	TXLNA	RPS10	PXN	ECI1	RPL27A	CBS	IREB2	SRSF1	TMED10	GSDMD	EIF3B	COL14A1	BCAR1	DST
ATP6V1E1	CRKL	BAG6	RPS19	CCT6A	MAP1B	NR2C2	TMPO	RPL5	KRT9	RFX5	ARHGAP1	RBM25	EPPK1	FCGRT	ITIH3	STX17	CAV1
CPOX	MTIF2	NSF	RPL3	NNMT	GNPDA1	MAPKAPK2	STAT1	RPL21	IRS1	PIP4K2A	PCDH1	NUMB	ANTXR2	BID	PTPN11	HUNK	ACY1
RPL4	BAG6	CDKN1B	COL18A1	RPL13A	NEDD4	ALDH9A1	STAT6	RPL28	AGL	ARCN1	PPP3CA	EIF2B2	SMIM11	ATP5MF	PPAT	CFAP298	TNFAIP2
NUDT1	NSF	MAP2K3	DDOST	ARL1	YAP1	RPL34	MTREX	RPS9	MYH9	LSS	DHX9	HINT1	MTPN	MARS1	GFPT1	JAM2	LMNB2
LONP1	CDKN1B	BRCC3	ANP32A	MLH1	UTRN	RPIA	AKR1C3	RPS5	MYH10	GCLC	CRYZ	FHIT	GNG2	ITGA1	EXOSC9	TMEM33	MVK
PGM1	NOTCH1	RPL27A	FEN1	STAT3	IQGAP1	LMAN1	PIK3CA	RPS10	COPB2	GCLM	GOLGA2	NUP153	ARPC4	ARPP19	PSME1	SYNJ2BP	TAP1
PPP1CC	MAP2K3	RPL5	CUX1	USP8	HAAO	NASP	PIK3CB	MAP1B	SOAT1	TRAPPC10	LGALS3BP	RANBP2	CD81	ATP5MJ	GABPA	GEMIN4	RELA
TGFBR1	BRCC3	RPL21	CAPG	PEX19	GYG1	FASN	MTOR	GNPDA1	ADD1	PSMD8	MFGE8	RGS3	SEC61G	ATP5ME	FMR1	RAB25	UBXN1
GNL1	RPL27A	RPL28	CAP2	MDH1	STT3A	FNTA	PI4KA	NEDD4	BSG	SERPINB4	DMTN	NDUFV1	TPI1	LGALS4	FMOD	CORO7	GBE1
SERPINB5	RPL5	RPS9	TXLNA	MDH2	PLA2G4A	FNTB	EPS15	YAP1	FUS	PRRC2A	PUDP	GSK3B	EIF3E	EIF6	PRDX1	NUP107	EIF4G1
POLR2I	RPL21	RPS5	CCT6A	RFC5	RAP1GAP	CCT3	CASP3	UTRN	NUP214	GSS	CD47	GZMK	SEC61B	CTBP2	RPL18	GSDMD	ATP7A
SERPINF1	RPL28	RPS10	PSMB10	RFC3	CAPZA2	MRPL19	CASP2	IQGAP1	DEK	CCT5	PPID	NT5C2	PPP4C	NDUFA6	C1QBP	EPPK1	TLE3
DLST	RPS9	MAP1B	ARL1	HADHA	CAPZB	ARRB1	RPS27	GYG1	ATP7B	PTDSS1	SSRP1	SEPHS1	GABARAPL2	BCAR1	CKAP4	ANTXR2	TLE4
GPX4	RPS5	GNPDA1	MLH1	EIF2S3	ALDH1A3	TUFM	ABL2	STT3A	CHKA	NES	MAB21L4	MTHFS	MYL6	TMEM33	TJP1	SMIM11	HGFAC
SRP14	RPS10	NEDD4	STAT3	CETN2	QARS1	ALDH7A1	FRK	RABIF	PPM1A	HSPA13	RBBP4	GMPS	EIF4A1	SYNJ2BP	DPT	MTPN	GLO1
TGFBR2	MAP1B	YAP1	USP8	ETV6	RPL29	INPP1	HELZ	PLA2G4A	AHR	CSNK1A1	AHNAK	LIG3	RPS20	RAB25	KHDRBS1	RAB15	SSBP1
NUP62	GNPDA1	UTRN	PEX19	EIF2D	ZFP36L2	CYB561	RBM34	CAPZA2	KRT2	IDH2	FCHO2	MRE11	PSMA6	CORO7	BAX	GNG2	REL
HPCAL1	NEDD4	IQGAP1	MDH1	BUD31	UQCRFS1	CENPF	LRPPRC	CAPZB	HMGCL	PIK3CG	C2orf80	ENTPD1	S100A10	NUP107	KLC1	DNAJB13	YWHAH
FDFT1	YAP1	STT3A	MDH2	NAA10	ATP5PO	SRP9	ACAA2	ALDH1A3	PSMC2	PITPNB	APOBR	HNMT	CDC42	GSDMD	LRP1	ARPC4	PLP2
ZEB1	UTRN	PLA2G4A	RFC5	KDM5C	PREP	UBE2A	RPL35	QARS1	ARL2	ADGRE5	SCRN3	GNAQ	DSTN	EPPK1	SRSF1	CD81	PTPN12
PIGA	IQGAP1	RAP1GAP	RFC3	PPP1R2	ME1	PCYT1A	CDKN2A	RPL29	ARL3	MARCKSL1	CGNL1	GNG10	GMFB	MTPN	ARHGAP1	TPI1	CLC
TAGLN2	GYG1	CAPZA2	HADHA	CSK	IREB2	AARS1	PRCP	LGALS7B	MAP2K2	PXN	NEXN	IDH3A	RAB8A	RAB15	PCDH1	EIF3E	PTK2
TALDO1	STT3A	CAPZB	EIF2S3	PNPLA4	PIP4K2A	CARS1	HTT	UQCRFS1	ATP5F1C	MAPKAPK2	AP1B1	SULT1A1	SPCS3	GNG2	PPP3CA	SEC61B	PRKCD
SNCA	PLA2G4A	ALDH1A3	CETN2	GARS1	SOX9	HARS2	ECE1	ATP5PO	ATP6V1E1	DNASE1L1	BST2	MMP14	SRP54	ARPC4	DHX9	PPP4C	CALD1
ETFB	RAP1GAP	QARS1	ETV6	IARS1	ARCN1	SARS1	MTHFR	PREP	CPOX	ALDH9A1	NUP160	GDI2	RAB2A	CD81	CRYZ	GABARAPL2	COL14A1
COIL	CAPZA2	RPL29	EIF2D	TNFSF9	LSS	PPM1F	SLC1A1	ME1	RPL4	RPL34	TWF1	EMD	RAB5B	TPI1	LGALS3BP	MYL6	ITIH3
GGCX	CAPZB	LGALS7B	WNT5A	PRKCI	GCLC	PRIM1	SLC1A4	IREB2	NUDT1	RPIA	ASPH	CPT1A	RAB10	EIF3E	LOXL1	EIF4A1	PTPN11
LIPA	ALDH1A3	UQCRFS1	BUD31	ACTR1B	GCLM	PRIM2	PAFAH1B1	RFX5	LONP1	LMAN1	AKAP13	GATM	UBE2M	SEC61B	MFGE8	RPS20	PPAT
ATP6V1A	QARS1	SLC6A8	NAA10	ECI1	TRAPPC10	CASP4	CRAT	PIP4K2A	PGM1	NASP	EFEMP1	SERPINB8	UBE2K	PTEN	DMTN	PSMA6	GFPT1
HSPA9	RPL29	ATP5PO	KDM5C	TMPO	PSMD8	CSNK1E	CTSO	SOX2	PPP1CC	FASN	SMARCB1	SERPINB9	UBE2N	PPP4C	PUDP	S100A10	AOX1
EIF4A3	ZFP36L2	PREP	PPP1R2	STAT1	PRRC2A	CEBPD	MATR3	SOX9	BMPR1A	FNTA	STX4	SERPINH1	RAB14	MYL6	CD47	CDC42	PSME1
IGHMBP2	UQCRFS1	ME1	CSK	STAT6	GSS	PSMB3	MSH2	ARCN1	GNL1	FNTB	DPYD	PDLIM4	ACTR3	EIF4A1	PPID	DSTN	FMR1
RPS19	SLC6A8	IREB2	PNPLA4	MTREX	CCT5	PSMB2	BTD	LSS	SERPINB5	DHPS	TP53BP1	VASP	ACTR2	RPS20	SSRP1	GMFB	FMOD
RPL3	ATP5PO	RFX5	GARS1	AKR1C3	NMU	MCM2	GPD2	GCLC	POLR2I	CCT3	AIMP1	DNM2	ACTR1A	PSMA6	SLFN5	RAB8A	PRDX1
COL18A1	PREP	PIP4K2A	IARS1	PIK3CA	PTDSS1	ACADVL	SSR1	GCLM	SERPINF1	MRPL19	ILF2	METAP2	TMEM258	S100A10	MAB21L4	SPCS3	RPL18
MPV17	ME1	SOX2	PRKCI	PIK3CB	HSPA13	YLPM1	ALDH3B1	TRAPPC10	DLST	ARRB1	ILF3	NUDT2	COPS2	CDC42	VAC14	SRP54	C1QBP
DDOST	IREB2	ARCN1	ACTR1B	MTOR	CSNK1A1	VPS41	PTPN9	PSMD8	GPX4	TUFM	LMAN2	CDK7	ABCE1	DSTN	NSUN2	RAB4B	CKAP4
FEN1	RFX5	LSS	ECI1	PI4KA	CSNK1D	TMED10	SYK	PRRC2A	SCNN1A	ALDH7A1	PTPRJ	KNTC1	RAP2B	GMFB	RBBP4	RAB2A	ENPEP
CUX1	PIP4K2A	GCLC	TMPO	EPS15	IDH2	RBM25	RANBP1	GSS	SRP14	INPP1	TRAP1	RASSF2	RPS3A	RAB8A	AHNAK	RAB5B	TJP1
CAPG	SOX2	GCLM	STAT1	CASP3	PITPNB	NUMB	NAMPT	CCT5	NUP62	SRP9	ANK3	LRBA	PSME3	SPCS3	RAD51AP2	RAB10	KLRC3
CAP2	SOX9	TRAPPC10	STAT6	CASP2	ADGRE5	CLK3	PSMC4	PTDSS1	HPCAL1	UBE2A	DLG1	BCAM	RPL15	SRP54	APOBR	UBE2M	KHDRBS1
IL6ST	ARCN1	PSMD8	MTREX	RPS27	POLD2	EIF2B2	NKX2-1	HSPA13	FDFT1	PCYT1A	MYO1E	PPT1	RPL27	RAB2A	SCRN3	UBE2K	BAX
TXLNA	LSS	PRRC2A	AKR1C3	ABL2	MARCKSL1	HINT1	TSFM	AMT	PIGA	AARS1	ECH1	RPL14	ATP6V0D1	RAB5B	CGNL1	UBE2N	BCL2L1
CCT6A	GCLC	GSS	PIK3CB	HELZ	PXN	RARRES1	PPIC	CSNK1A1	TAGLN2	CARS1	STRN3	CCT8	PCBD1	CKS1B	NEXN	RAB14	KLC1
PBX2	GCLM	CCT5	MTOR	NCAPD3	CAMLG	FHIT	VDAC2	CSNK1D	TALDO1	HARS2	STK4	CCT4	RPL37A	RAB10	GALNT1	ACTR3	LRP1
RPL13A	TRAPPC10	PTDSS1	PI4KA	RBM34	NR2C2	NUP153	ACADSB	IDH2	SNCA	SARS1	FLII	ANXA11	NCALD	UBE2M	AP1B1	ACTR2	SRSF1
ARL1	PSMD8	HSPA13	HAL	LRPPRC	MAPKAPK2	RANBP2	CBX5	PITPNB	ETFB	PPM1F	COASY	PAPOLA	HSPE1	UBE2K	BST2	ACTR1A	ARHGAP1
MLH1	PRRC2A	CSNK1A1	EPS15	ACAA2	DNASE1L1	RGS3	USP5	ADGRE5	COIL	CASP4	ACACA	FXR1	SEC61A1	UBE2N	PMPCA	TMEM258	PCDH1
STAT3	GSS	CSNK1D	CASP3	RPL35	ALDH9A1	TSC2	MAPK8	POLD2	GGCX	PSMB3	LCP2	FXR2	LYZ	RAB14	SCRN1	COPS2	PPP3CA
USP8	CCT5	IDH2	CASP2	CDKN2A	RPL34	NDUFV1	MAPK9	MARCKSL1	LIPA	PSMB2	GPS1	RAB5C	VBP1	ACTR3	NUP160	ABCE1	DHX9
PEX19	PTDSS1	PITPNB	RPS27	PRCP	RPIA	GSK3A	MAP2K4	PXN	ATP6V1A	MCM2	USP4	RAB7A	STXBP1	ACTR2	TWF1	RAP2B	CRYZ
MDH1	HSPA13	ADGRE5	TEC	HTT	LMAN1	GSK3B	MKI67	NR2C2	HSPA9	ACADVL	MTAP	RAB9A	B2M	ACTR1A	ASPH	RPS3A	GOLGA2
MDH2	CSNK1A1	POLD2	ABL2	ECE1	NASP	TAF6	PHKA2	MAPKAPK2	EIF4A3	YLPM1	CALCOCO2	RAB13	DAD1	COPS2	AKAP13	PSME3	LGALS3BP
RFC5	CSNK1D	MARCKSL1	FRK	MTHFR	FASN	NT5C2	PHKA1	ALDH9A1	IGHMBP2	ACOT2	TARDBP	RAB27A	NPC2	ABCE1	EFEMP1	RPL15	MFGE8
RFC3	IDH2	PXN	HELZ	SLC1A3	FNTA	SEPHS1	RANGAP1	RPL34	RPS19	TMED10	HNRNPA0	PLCD1	COPZ1	RAP2B	SMARCB1	RPL27	DMTN
HADHA	PITPNB	NR2C2	NCAPD3	SLC1A1	FNTB	MTHFS	RECQL	RPIA	RPL3	RBM25	PAK1	DAP3	AP1S1	RPS3A	STX4	ATP6V0D1	PUDP
EIF2S3	ADGRE5	MAPKAPK2	RBM34	SLC1A4	DHPS	GMPS	NOP2	LMAN1	COL18A1	NUMB	PRDX4	DUSP3	NUTF2	RPL26	NFIA	PCBD1	PPID
ETV3	POLD2	DNASE1L1	LRPPRC	PAFAH1B1	CCT3	LIG3	ATRX	NASP	MPV17	CLK3	PAK2	SMARCA2	HNRNPK	PSME3	CNTN1	RPL37A	SSRP1
CETN2	MARCKSL1	ALDH9A1	RPL35	MCAM	MRPL19	LIG4	CRK	FASN	DDOST	EIF2B2	CBX3	SMARCA4	YWHAG	RPL15	DPYD	NCALD	RBL2
ETV6	PXN	RPL34	PRCP	CRAT	ARRB1	MRE11	CRKL	FNTA	FEN1	HINT1	STK3	IDH3G	TIMM10	RPL27	TP53BP1	HSPE1	MAB21L4
EIF2D	MAPKAPK2	RPIA	HTT	MATR3	TUFM	KHK	MTIF2	FNTB	CUX1	FHIT	STX5	GALK1	RPS7	ATP6V0D1	AIMP1	SEC61A1	VAC14
BUD31	DNASE1L1	LMAN1	ECE1	MSH2	ALDH7A1	HNMT	BAG6	DHPS	CAPG	NUP153	PSMD2	SSR4	PPP1CA	PCBD1	ILF2	LYZ	NSUN2
NAA10	ALDH9A1	NASP	MTHFR	BTD	INPP1	GNAQ	NSF	CCT3	CAP2	RANBP2	SELENBP1	BCAP31	PPP1CB	RPL37A	ILF3	VBP1	RBBP4
KDM5C	RPL34	FASN	SLC1A1	GPD2	CYB561	GNG10	CDKN1B	MRPL19	IL6ST	RGS19	CHIT1	TPMT	PSMC1	NAA20	LMAN2	STXBP1	AHNAK
PPP1R2	RPIA	FNTA	SLC1A4	SSR1	CENPF	IDH3A	NOTCH1	ARRB1	TXLNA	RGS3	NME3	RENBP	PSMC5	HSPE1	TRAP1	B2M	SLC10A7
CSK	LMAN1	FNTB	PAFAH1B1	PTPN9	SRP9	SULT1A1	MAP2K3	TUFM	CCT6A	TSC2	SRSF5	MECP2	RPS8	SEC61A1	ANK3	DAD1	APOBR
PNPLA4	SLC11A2	DHPS	CRAT	SYK	UBE2A	MMP14	BRCC3	ALDH7A1	PSMB10	NDUFV1	SRSF6	HCFC1	RPS15A	LYZ	DLG1	NPC2	SCRN3
GARS1	NASP	CCT3	MATR3	RANBP1	PCYT1A	PPOX	RPL27A	INPP1	VHL	GSK3A	TRIM28	CAV2	RPS16	VBP1	ECH1	COPZ1	CGNL1
IARS1	FASN	MRPL19	MSH2	NAMPT	AARS1	GDI2	RPL5	CYB561	ADH7	GSK3B	STX3	ALDH3A2	UBE2G1	B2M	STRN3	UFM1	NEXN
PRKCI	FNTA	TUFM	BTD	KIR2DL1	CARS1	EMD	RPL21	SRP9	PBX1	GZMK	NMI	ALDH5A1	UBE2H	DAD1	STK4	DCAF7	AP1B1
ACTR1B	FNTB	CDC34	GPD2	PSMC4	HARS2	CPT1A	RPL28	UBE2A	ARL1	NT5C2	KCNAB2	HSD17B4	YWHAE	NPC2	FLII	AP1S1	BST2
ECI1	DHPS	INPP1	SSR1	TSFM	SARS1	GATM	RPS9	PCYT1A	MLH1	SEPHS1	PTK7	PSMD7	RPS14	COPZ1	COASY	NUTF2	PMPCA
TMPO	CCT3	CYB561	MAGEA9B	ABCG1	PPM1F	SERPINB9	RPS5	AARS1	STAT3	SELENOP	SGCG	CCR5	RPS23	UFM1	LCP2	HNRNPK	SCRN1
STAT1	MRPL19	CENPF	PTPN9	PPIC	MAN2A2	SERPINH1	RPS10	CARS1	USP8	CAMP	MTA1	SUOX	RPS18	DCAF7	GPS1	YWHAG	WASHC5
STAT6	ARRB1	SRP9	RANBP1	VDAC2	PRIM1	PDLIM4	MAP1B	HARS2	PEX19	MTHFS	EIF3I	STAT5B	RPS13	AP1S1	USP4	RRAS2	NUP160
MTREX	TUFM	UBE2A	NAMPT	ACADSB	PRIM2	PEX5	GNPDA1	SARS1	MDH1	GMPS	CTBP1	USP11	SNRPE	NUTF2	MTAP	TIMM10	TWF1
AKR1C3	ALDH7A1	PCYT1A	PSMC4	CBX5	PSMB3	VASP	NEDD4	PPM1F	MDH2	MRE11	MRPL49	CLCN3	LSM3	HNRNPK	CALCOCO2	RPS7	ASPH
PIK3CA	CDC34	AARS1	TSFM	USP5	PSMB2	DNM2	YAP1	PRIM1	RFC5	ENTPD1	DYNC1I2	CLCN7	LSM6	YWHAG	TARDBP	PPP1CA	AKAP13
PIK3CB	INPP1	CARS1	ABCG1	MAPK8	MCM2	METAP2	UTRN	PRIM2	RFC3	HNMT	ILK	VAMP7	SNRPD1	RPS7	HNRNPA0	PPP1CB	EFEMP1
MTOR	CYB561	HARS2	PPIC	MAPK9	ACADVL	NUDT2	IQGAP1	CASP4	HADHA	GNAQ	NNT	RPS6KA3	SNRPD2	PPP1CA	PAK1	PSMC1	STX4
PI4KA	SRP9	SARS1	VDAC2	MAP2K4	YLPM1	CDK7	HAAO	CSNK1E	EIF2S3	GNG10	SNTB2	ADCY7	SNRPD3	PPP1CB	PRDX4	PSMC5	SF3A3
EPS15	UBE2A	PPM1F	ACADSB	MKI67	ACOT2	HLCS	GYG1	PSMB3	ID1	IDH3A	SF3B2	AKR1D1	ARF6	PSMC1	PAK2	RPS8	TP53BP1
CASP3	PCYT1A	MAN2A2	CBX5	PHKA2	VPS41	KNTC1	STT3A	PSMB2	ETV3	SULT1A1	OS9	HDGF	PSMC6	PSMC5	CBX3	RPS15A	AIMP1
RPS27	AARS1	PRIM1	USP5	PHKA1	TMED10	CDK9	RABIF	MCM2	BCL6	MMP14	PDAP1	LUM	SELENOT	RPS8	STK3	RPS16	ILF2
HELZ	CARS1	PRIM2	MAPK8	RANGAP1	RBM25	LRBA	PLA2G4A	ACADVL	CETN2	PPOX	LSAMP	PRELP	RPL7A	RPS15A	STX5	UBE2H	ILF3
NCAPD3	HARS2	PSMB3	MAP2K4	RECQL	NUMB	BCAM	CAPZA2	YLPM1	ETV6	GDI2	FKBP5	CNN1	POLR2G	RPS16	PSMD2	YWHAE	LMAN2
RBM34	SARS1	PSMB2	MKI67	NOP2	CLK1	PPT1	CAPZB	VPS41	EIF2D	EMD	MYO9B	NDUFA8	ETF1	UBE2H	MMRN1	RPS14	PTPRJ
LRPPRC	PPM1F	MCM2	PHKA2	ATRX	CLK2	RPL14	ALDH1A3	TMED10	BUD31	CPT1A	ROCK1	HNRNPA3	RPS4X	YWHAE	SEMA3B	RPS23	EPS8
ACAA2	MAN2A2	ACADVL	PHKA1	CRK	CLK3	CCT8	QARS1	RBM25	UBA7	GATM	GAB1	PGD	RPL23A	RPS14	SELENBP1	RPS18	TRAP1
RPL35	PRIM1	YLPM1	RANGAP1	CRKL	EIF2B2	CCT4	RPL29	NUMB	NAA10	SERPINB8	TCIRG1	HNRNPM	RPS6	RPS23	CHIT1	RPS13	ANK3
CDKN2A	PRIM2	VPS41	RECQL	MTIF2	HINT1	ANXA11	LGALS7B	CLK2	KDM5C	SERPINB9	GPM6B	KPNA2	VSNL1	RPS18	NME3	SNRPE	DLG1
PRCP	CSNK1E	TMED10	NOP2	BAG6	NUP153	PAPOLA	ZFP36L2	CLK3	PPP1R2	SERPINH1	PICALM	KPNA1	H4C16	RPS13	SRSF9	LSM3	MYO1E
HTT	CEBPD	RBM25	ATRX	NSF	RANBP2	FXR1	UQCRFS1	EIF2B2	CSK	PDLIM4	MTM1	NCBP2	RAB1A	SNRPE	SRSF5	LSM6	GRIK3
ECE1	PSMB3	NUMB	CRK	NOTCH1	TSC2	FXR2	ATP5PO	HINT1	PNPLA4	PEX5	ASAH1	RAP1GDS1	RAN	LSM3	SRSF6	SNRPD1	ECH1
MTHFR	PSMB2	CLK1	CRKL	MAP2K3	NDUFV1	RAB5C	LIMS1	RARRES1	GARS1	VASP	PRPF4B	POLR2H	RPL23	LSM6	TRIM28	SNRPD2	STRN3
SLC1A3	MCM2	CLK2	MTIF2	BRCC3	GSK3A	RAB7A	PREP	FHIT	IARS1	DNM2	PIN1	MAP2K6	RAP1A	SNRPD1	STX3	SNRPD3	STK4
SLC1A1	ACADVL	CLK3	BAG6	RPL27A	GSK3B	RAB9A	ME1	NUP153	PRKCI	METAP2	ATR	ARHGDIA	RPS15	SNRPD2	NMI	ARF6	FLII
SLC1A4	YLPM1	EIF2B2	NSF	RPL5	STK19	RAB13	IREB2	RANBP2	ACTR1B	NUDT2	EIF4EBP2	ARHGDIB	RPS24	SNRPD3	PTK7	PSMC6	COASY
PAFAH1B1	VPS41	HINT1	CDKN1B	RPL21	TAF6	RAB28	RFX3	RGS3	ECI1	HLCS	RIPK1	AGFG1	RPS25	ARF6	SGCG	SELENOT	ACACA
MCAM	TMED10	FHIT	MAP2K3	RPL28	NT5C2	RAB27A	RFX5	TSC2	TMPO	KNTC1	CAMK2D	HNRNPF	RPS26	PSMC6	PTPRS	RPL7A	LCP2
CRAT	RBM25	NUP153	BRCC3	RPS9	SEPHS1	PLCD1	PIP4K2A	NDUFV1	STAT1	RASSF2	DCTN2	STAT2	RPS28	SELENOT	EIF3I	POLR2G	GPS1
MATR3	NUMB	RANBP2	RPL27A	RPS5	MTHFS	DAP3	SOX2	GSK3A	STAT6	LRBA	NAE1	GTF2A1	FAU	RPL7A	CTBP1	ETF1	USP4
MSH2	CLK1	TSC2	RPL5	RPS10	GMPS	DUSP3	SOX9	GSK3B	MTREX	BCAM	IQGAP2	MSH6	RPL30	POLR2G	MRPL49	RPS4X	MTAP
BTD	CLK3	NDUFV1	RPL21	MAP1B	LIG3	SMARCA2	ARCN1	STK19	AKR1C3	PPT1	STIM1	KIF11	RPL31	ETF1	DYNC1I2	RPL23A	PPFIA1
GPD2	EIF2B2	GSK3B	RPL28	GNPDA1	LIG4	SMARCA4	LSS	TAF6	PIK3CA	RPL14	SNX1	RBM5	RPL10A	RPS4X	ORC2	RPS6	CALCOCO2
SSR1	HINT1	TAF6	RPS9	NEDD4	MRE11	IDH3G	PPP3CC	KLK7	PIK3CB	CCT8	MTMR1	SMS	RPL11	RPL23A	ILK	VSNL1	TARDBP
PTPN9	FHIT	NT5C2	RPS5	YAP1	KHK	GALK1	GCLC	NT5C2	MTOR	CCT4	CUL1	HK2	RPL8	RPS6	NNT	H4C16	PAK1
SYK	NUP153	SEPHS1	RPS10	UTRN	GNAQ	SSR4	GCLM	SEPHS1	PI4KA	ANXA11	CUL2	HK3	PPIA	VSNL1	SNTB2	RAB1A	PRDX4
RANBP1	RANBP2	MTHFS	MAP1B	IQGAP1	GNG10	BCAP31	CD151	MTHFS	EPS15	PAPOLA	CUL3	MRPL12	FKBP1A	H4C16	TCOF1	RAN	PAK2
NAMPT	TSC2	GMPS	GNPDA1	STT3A	IDH3A	TPMT	TRAPPC10	GMPS	MLLT3	FXR1	CUL4A	DGKQ	GRB2	RAB1A	SF3B2	RAP1A	CBX3
KIR2DL3	NDUFV1	LIG3	NEDD4	RABIF	SULT1A1	CYP2J2	PSMD8	LIG3	CASP3	FXR2	CUL4B	THOP1	TRA2B	RAN	OS9	RPS15	STK3
PSMC4	GSK3A	LIG4	YAP1	PLA2G4A	MMP14	MECP2	PRRC2A	LIG4	CASP2	RAB5C	GFUS	AKR1C2	AP2B1	RPL23	PDAP1	RPS24	STX5
TSFM	GSK3B	MRE11	UTRN	CAPZA2	PPOX	HCFC1	GSS	MRE11	RPS27	RAB7A	RAB31	CAPZA1	PPP3R1	RAP1A	LSAMP	RPS26	PSMD2
ABCG1	STK19	KHK	IQGAP1	CAPZB	GDI2	IRAK1	CCT5	KHK	FRK	RAB9A	RAB32	CRIP2	YWHAZ	RPS15	FKBP5	RPS28	MMRN1
PPIC	TAF6	GNAQ	GYG1	ALDH1A3	EMD	CAV2	PTDSS1	HNMT	HELZ	RAB13	FHL1	NUP98	PPP2R2A	RPS24	ROCK1	FAU	SEMA3B
VDAC2	NT5C2	GNG4	STT3A	QARS1	CPT1A	ALDH3A2	HSPA13	GNAQ	NCAPD3	RAB27A	ITGA7	BLVRA	DYNLT1	RPS25	IL18R1	RPL30	SELENBP1
ACADSB	SEPHS1	GNG10	RABIF	RPL29	GATM	ALDH5A1	AMT	GNG10	RBM34	PLCD1	AAMP	SLC25A1	RPL38	RPS26	GAB1	RPL31	CHIT1
CBX5	MTHFS	IDH3A	PLA2G4A	UQCRFS1	SERPINB9	HSD17B4	CSNK1A1	IDH3A	LRPPRC	DAP3	MOGS	PPP5C	SKP1	RPS28	TCIRG1	RPL10A	NME3
USP5	GMPS	MMP14	RAP1GAP	XDH	SERPINH1	PSMD7	CSNK1D	SULT1A1	ACAA2	DUSP3	ALCAM	ARFIP2	RPS21	FAU	PICALM	RPL11	SRSF6
MAPK8	LIG3	PPOX	CAPZA2	SLC6A8	PEX5	SUOX	IDH2	MMP14	RPL35	SMARCA2	LAMB3	ARFIP1	EIF5A	RPL30	ASAH1	RPL8	TRIM28
MAPK9	LIG4	GDI2	CAPZB	ATP5PO	ERF	SGSH	PITPNB	PPOX	PRCP	SMARCA4	LAMC2	NUBP1	RACK1	RPL31	PIN1	PPIA	STX3
MAP2K4	MRE11	EMD	ALDH1A3	PREP	VASP	STAT5B	ADGRE5	GDI2	HTT	IDH3G	ITGA9	ACLY	UBE2I	RPL10A	EIF4EBP2	FKBP1A	G3BP1
MKI67	KHK	CPT1A	QARS1	ME1	DNM2	USP11	POLD2	EMD	ECE1	GALK1	SPTAN1	METAP1	YBX1	RPL32	RIPK1	GRB2	NMI
PHKA2	GNAQ	GATM	RPL29	IREB2	METAP2	CLCN3	MARCKSL1	CPT1A	MTHFR	SSR4	DDX39B	SUCLG1	SEC11A	RPL11	DCTN2	TRA2B	KCNAB2
PHKA1	GNG4	SERPINH1	LGALS7B	RFX5	NUDT2	PLXNA3	PXN	GATM	SLC1A3	BCAP31	EXOSC2	MVD	TPM4	RPL8	NAE1	AP2B1	PTK7
RANGAP1	GNG10	PDLIM4	UQCRFS1	PIP4K2A	CDK7	VAMP7	CAMLG	SERPINB8	SLC1A1	TPMT	SNTB1	PGGT1B	TUBA4A	PPIA	ITPK1	PPP3R1	PABPC4
RECQL	IDH3A	PEX5	SLC6A8	SOX9	HLCS	RPS6KA3	NR2C2	SERPINB9	SLC1A4	RENBP	TUBB2A	RABGGTB	TUBB4B	FKBP1A	SNW1	YWHAZ	ATM
NOP2	MMP14	VASP	ATP5PO	ARCN1	KNTC1	AKR1D1	MAPKAPK2	SERPINH1	PAFAH1B1	MECP2	CAPS	COPB1	CSNK2A1	GRB2	IQGAP2	PPP2R2A	IFIT5
ATRX	PPOX	DNM2	SLC6A9	LSS	CDK9	HDGF	ALDH9A1	PDLIM4	CRAT	HCFC1	PRKG1	COPA	PAFAH1B2	TRA2B	STIM1	DYNLT1	EIF3I
CRK	GDI2	METAP2	PREP	PPP3CC	LRBA	CCNH	RPL34	PEX5	CTSO	IRAK1	IL16	CTSC	HBB	RAC1	SNX1	RPL38	CTBP1
CRKL	EMD	NUDT2	ME1	GCLC	BCAM	MNAT1	RPIA	VASP	MATR3	CAV2	CKAP5	CRYBB1	HBG1	AP2B1	MTMR1	SKP1	UBE2V1
MTIF2	CPT1A	CDK7	IREB2	GCLM	PPT1	NDUFA8	LMAN1	DNM2	MSH2	ALDH3A2	CIRBP	AP2S1	HBG2	PPP3R1	CUL3	RPS21	MRPL49
BAG6	GATM	HLCS	RFX5	TRAPPC10	RPL14	HNRNPA3	NASP	METAP2	GRK6	HSD17B4	CAMK1	HCCS	HBA2	YWHAZ	CUL4A	EIF5A	DYNC1I2
NSF	SLC26A2	KNTC1	PIP4K2A	PSMD8	CCT8	PGD	FASN	NUDT2	BTD	PSMD7	COTL1	SLC16A1	IGBP1	UBE2B	CUL4B	RACK1	ILK
MAP2K3	SERPINH1	CDK9	SOX9	SERPINB4	CCT4	HNRNPM	FNTA	CDK7	GPD2	SUOX	COX17	IST1	SIRPA	PPP2R2A	GFUS	ACTG2	NNT
BRCC3	PDLIM4	LRBA	ARCN1	PRRC2A	ANXA11	KPNA2	FNTB	HLCS	SSR1	STAT5B	HNRNPD	SEC24C	EIF4G2	DYNLT1	RAB32	UBE2I	SNTB2
RPL27A	PEX5	PPT1	LSS	GSS	PAPOLA	KPNA1	CCT3	KNTC1	ALDH3B1	USP11	SCARB2	SUB1	GTF2I	RPL38	FHL1	YBX1	TCOF1
RPL5	VASP	RPL14	GCLC	CCT5	FXR1	NCBP2	MRPL19	CDK9	PTPN9	VAMP7	NID2	CLNS1A	CNTNAP1	SKP1	FHL3	SEC11A	SF3B2
RPL21	DNM2	CCT8	GCLM	PTDSS1	FXR2	RAP1GDS1	ARRB1	LRBA	SYK	RPS6KA3	DAG1	RARS1	CCT2	RPS21	ITGA7	TPM4	OS9
RPL28	METAP2	CCT4	TRAPPC10	HSPA13	RAB5C	POLR2H	TUFM	BCAM	RANBP1	ADCY7	DSG2	ATXN1	KRT85	EIF5A	AAMP	UBE2L3	PDAP1
RPS9	NUDT2	ANXA11	PSMD8	CSNK1A1	RAB7A	MAP2K6	ALDH7A1	PPT1	NAMPT	HDGF	UBE4A	CACNA2D1	RAE1	RACK1	MOGS	TUBA4A	FKBP5
RPS5	CDK7	PAPOLA	PRRC2A	CSNK1D	RAB9A	ARHGDIA	INPP1	RPL14	PSMC4	LUM	SEPTIN6	YARS1	GSTO1	UBE2I	ALCAM	TUBB4B	ROCK1
RPS10	HLCS	FXR1	GSS	IDH2	RAB13	ARHGDIB	CYB561	CCT8	NKX2-1	PRELP	EIF3A	USP14	RELN	YBX1	LAMB3	CSNK2A1	TCIRG1
MAP1B	KNTC1	FXR2	CCT5	PITPNB	RAB28	AGFG1	SRP9	CCT4	TSFM	CNN1	ARHGEF7	PRKAG1	PRKDC	SEC11A	LAMC2	PAFAH1B2	PICALM
GNPDA1	CDK9	RAB5C	PTDSS1	SLC9A3	PDE6C	HNRNPF	UBE2A	ANXA11	ABCG1	CCNH	SCRIB	HSPA2	ADAM17	CSNK2B	ITGA9	HBB	MTM1
NEDD4	LRBA	RAB7A	HSPA13	ADGRE5	PLCD1	STAT2	PCYT1A	PAPOLA	PPIC	MNAT1	GIT2	BCAT1	BLOC1S1	TPM4	SPTAN1	HBG1	TUBB3
YAP1	BCAM	RAB9A	CSNK1A1	POLD2	DAP3	GTF2A1	AARS1	FXR1	VDAC2	NDUFA8	MLEC	ATP1B3	SRPX	UBE2L3	DDX39B	HBG2	ASAH1
UTRN	PPT1	RAB13	CSNK1D	MARCKSL1	DUSP3	MSH6	CARS1	FXR2	ACADSB	HNRNPA3	TTLL12	RAD23A	MAP1A	TUBA4A	EXOSC2	HBA2	PRPF4B
IQGAP1	RPL14	RAB28	IDH2	PXN	MMP15	KIF11	HARS2	RAB5C	CBX5	PGD	DOCK1	RAD23B	CRADD	TUBB4B	BMPR2	CXADR	PIN1
STT3A	CCT8	FABP6	PITPNB	CAMLG	DNA2	VAV2	SARS1	RAB7A	USP5	HNRNPM	CRMP1	PDE1A	ADARB1	CSNK2A1	SNTB1	IGBP1	RIPK1
RABIF	CCT4	PLCD1	ADGRE5	NR2C2	SMARCA2	RBM5	PPM1F	RAB9A	MAPK8	KPNA2	DPYSL3	EPHA5	HLA-DRB3	PAFAH1B2	IDI1	SIRPA	DCTN2
PLA2G4A	ANXA11	DAP3	POLD2	MAPKAPK2	SMARCA4	RIDA	MAN2A2	RAB13	MAPK9	KPNA1	MRPL58	NAGLU	GPLD1	HBB	CAPS	EIF4G2	NAE1
CAPZA2	PAPOLA	DUSP3	MARCKSL1	DNASE1L1	IDH3G	SMS	PRIM1	RAB28	MAP2K4	NCBP2	DCTN1	GALC	LCN2	HBG1	CBFB	GTF2I	IQGAP2
CAPZB	FXR1	SMARCA2	PXN	ALDH9A1	GALK1	HK2	PRIM2	RAB27A	MKI67	RAP1GDS1	DYNC1H1	AK2	IFI35	HBG2	PRKG1	CCT2	STIM1
QARS1	FXR2	SMARCA4	CAMLG	RPL34	SSR4	EFNB2	CASP4	FABP6	PHKA2	JAK3	EIF2B1	ALDH18A1	NUCB2	HBA2	IL16	OLR1	SNX1
RPL29	RAB5C	IDH3G	NR2C2	RPIA	BCAP31	EFNA5	CSNK1E	PLCD1	PHKA1	POLR2H	EIF4A2	NAPA	ABAT	IGBP1	CKAP5	RAE1	DNASE1L3
ZFP36L2	RAB7A	GALK1	MAPKAPK2	LMAN1	TPMT	MRPL12	PSMB3	DAP3	RANGAP1	MAP2K6	CTTN	ADPRH	S100A12	SIRPA	CIRBP	GSTO1	MTMR1
UQCRFS1	RAB9A	SSR4	ALDH9A1	NASP	CYP2J2	DGKQ	PSMB2	DUSP3	RECQL	ARHGDIA	FLOT2	AIF1	BASP1	ADAM8	CAMK1	PRKDC	CUL1
XDH	RAB13	BCAP31	RPL34	FASN	MECP2	THOP1	MCM2	MMP15	NOP2	ARHGDIB	RCN2	EIF5	IGLV3-21	EIF4G2	COTL1	ADAM17	CUL2
ATP5PO	RAB28	TPMT	RPIA	FNTA	HCFC1	AKR1C2	ACADVL	SMARCA2	ATRX	AGFG1	TRIM25	PSMD4	TMF1	RPP30	COX17	BLOC1S1	CUL3
PREP	RAB27A	MECP2	LMAN1	FNTB	ALDH3A2	CAPZA1	YLPM1	SMARCA4	CRK	HNRNPF	PTK2B	DRG2	CRB1	GTF2I	HNRNPD	SRPX	CUL4A
ME1	FABP6	HCFC1	NASP	DHPS	ALDH5A1	HMGA2	VPS41	IDH3G	CRKL	STAT2	FLNC	PLTP	MRPS22	CCT2	SCARB2	MAP1A	GFUS
RFX5	PLCD1	IRAK1	FMO5	CCT3	HSD17B4	CRIP2	TMED10	GALK1	MTIF2	GTF2A1	FKBP8	CSE1L	MRPS25	SLC35A2	NID2	CRADD	RAB31
PIP4K2A	DAP3	ALDH3A2	FASN	MRPL19	PSMD7	NUP98	RBM25	SSR4	BAG6	MSH6	GNA13	VCP	MRPS35	KRT85	DPYS	ADARB1	RAB32
SOX9	DUSP3	HSD17B4	FNTA	ARRB1	ARSD	BLVRA	NUMB	BCAP31	NSF	KIF11	GALE	MFAP1	MRPS36	RAE1	DAG1	HLA-DRB3	FHL1
ARCN1	SMARCA2	PSMD7	FNTB	TUFM	ARSL	SLC25A1	CLK3	TPMT	CDKN1B	VAV2	GALNT3	MFAP4	SARNP	GSTO1	DSG2	GPLD1	RIN1
LSS	SMARCA4	SUOX	DHPS	ALDH7A1	STAT5B	PPP5C	EIF2B2	CYP2J2	NOTCH1	RBM5	CAPRIN1	HADHB	RBP5	PRKDC	UBE4A	LCN2	AAMP
PPP3CC	IDH3G	USP11	CCT3	INPP1	USP11	DAPK1	HINT1	MECP2	MAP2K3	SMS	RBM39	MANF	LACTB	ADAM17	SEPTIN6	IFI35	MOGS
GCLC	GALK1	CLCN3	MRPL19	CENPF	CLCN2	ARFIP2	RARRES1	HCFC1	BRCC3	HK2	SPARCL1	NCKAP1L	COG7	BLOC1S1	EIF3A	NUCB2	ALCAM
GCLM	SSR4	CLCN7	ARRB1	SRP9	CLCN3	ARFIP1	FHIT	IRAK1	RPL27A	HK3	HABP2	AFDN	RPL24	SRPX	ARHGEF7	ABAT	LAMB3
TRAPPC10	BCAP31	VAMP7	TUFM	UBE2A	CLCN7	NUBP1	NUP153	CAV2	RPL5	MRPL12	PDIA5	NAP1L1	TXNL4A	MAP1A	UBAP2L	S100A12	LAMC2
PSMD8	TPMT	RPS6KA3	ALDH7A1	PCYT1A	VAMP7	ACLY	RANBP2	ALDH3A2	RPL21	STC1	PRPSAP1	CASP7	CBX1	CRADD	GIT2	BASP1	SPTAN1
SERPINB4	MECP2	AKR1D1	CYB561	AARS1	RPS6KA3	METAP1	RGS3	ALDH5A1	RPL28	DGKQ	ITPR3	CASP6	ARF5	GPLD1	SCARF1	IGLV3-21	DDX39B
PRRC2A	HCFC1	HDGF	SRP9	CARS1	NR0B1	SUCLG1	TSC2	HSD17B4	RPS9	THOP1	ITIH4	ADK	RHOG	LCN2	MLEC	TMF1	SNTB1
GSS	IRAK1	CCNH	UBE2A	HARS2	TKTL1	MVD	NDUFV1	PSMD7	RPS5	CAPZA1	ITPR1	ADAR	RPL19	IFI35	TTLL12	MRPS22	CAPS
CCT5	ALDH3A2	MNAT1	PCYT1A	SARS1	AKR1D1	PGGT1B	GSK3A	SUOX	RPS10	CRIP2	PLS1	LAMB2	MXRA7	NUCB2	DOCK1	MRPS25	PRKG1
PTDSS1	ALDH5A1	NDUFA8	AARS1	PPM1F	HDGF	RABGGTB	GSK3B	SGSH	MAP1B	NUP98	CLINT1	CDH11	DAB2	S100A12	CRMP1	MRPS35	IL16
HSPA13	HSD17B4	HNRNPA3	CARS1	MAN2A2	LUM	COPB1	STK19	ARSD	GNPDA1	BLVRA	SMC1A	CDH13	FBLN2	BASP1	DPYSL3	MRPS36	CKAP5
CSNK1A1	PSMD7	PGD	HARS2	PRIM1	CCNH	COPA	TAF6	STAT5B	NEDD4	SLC25A1	MESD	TPD52	HSPG2	IGLV3-21	MRPL58	MRPS21	CIRBP
CSNK1D	SUOX	HNRNPM	SARS1	PRIM2	MNAT1	CTSC	NT5C2	USP11	YAP1	PPP5C	GANAB	SEC13	ARHGAP4	MRPS22	DCTN1	SARNP	COTL1
IDH2	STAT5B	KPNA2	PPM1F	CASP4	NEK3	LIMK2	SEPHS1	CLCN7	UTRN	DAPK1	MFSD10	SNU13	RBM10	MRPS35	DYNC1H1	RBP5	COX17
PITPNB	USP11	KPNA1	MAN2A2	CSNK1E	NDUFA8	CLTCL1	MTHFS	VAMP7	IQGAP1	ARFIP2	LBR	NPEPPS	RBM3	MRPS36	EIF2B1	LACTB	HNRNPD
LHX1	CLCN2	NCBP2	PRIM1	PSMB3	HNRNPA3	AP3M2	GMPS	RPS6KA3	HAAO	ARFIP1	COG2	HNRNPH2	ATP2C1	SARNP	EIF4A2	COG7	SCARB2
SLC9A3	CLCN6	RAP1GDS1	PRIM2	PSMB2	PGD	AP2S1	LIG3	AKR1D1	GYG1	NUBP1	MVP	OXCT1	ATP11A	HTRA3	CTTN	RPL24	NID2
ADGRE5	CLCN7	DGKE	CASP4	MCM2	HNRNPM	HCCS	LIG4	HDGF	STT3A	ACLY	LTBP1	EIF3B	CYCS	LACTB	FLOT2	TXNL4A	DAG1
POLD2	VAMP7	POLR2H	CSNK1E	THBS3	KPNA2	SLC5A3	MRE11	LUM	RABIF	SUCLG1	LTBP2	FCGRT	MPP1	COG7	RCN2	CBX1	DSG2
MARCKSL1	RPS6KA3	MAP2K6	CEBPD	ACADVL	KPNA1	TTC3	HNMT	CCNH	PLA2G4A	MVD	GOLGB1	BID	TFAM	RPL24	TRIM25	ARF5	UBE4A
PXN	HDGF	ARHGDIA	PSMB3	YLPM1	NCBP2	SLC16A1	GNAQ	MNAT1	CAPZA2	PGGT1B	FXYD3	ATP5MF	PITPNA	TXNL4A	PTK2B	RHOG	SEPTIN6
CAMLG	LUM	ARHGDIB	PSMB2	VPS41	RAP1GDS1	IST1	GNG10	NDUFA8	CAPZB	RABGGTB	LASP1	NDUFV3	SLC25A3	CBX1	FLNC	RPL19	EIF3A
NR2C2	CCNH	AGFG1	MCM2	TMED10	DGKE	SEC24C	IDH3A	HNRNPA3	ALDH1A3	COPB1	CRYM	RRP1	HDLBP	ARF5	FKBP8	MXRA7	ARHGEF7
MAPKAPK2	MNAT1	HNRNPF	THBS3	RBM25	POLR2H	SUB1	SULT1A1	PGD	QARS1	COPA	PTGR1	MARS1	CDK6	RHOG	GNA13	DAB2	UBAP2L
DNASE1L1	NDUFA8	STAT2	ACADVL	NUMB	MAP2K6	POLG	MMP14	HNRNPM	RPL29	CTSC	NFIX	ITGA1	CDK5	RPL19	GALE	FBLN2	GIT2
ALDH9A1	HNRNPA3	GTF2A1	YLPM1	CLK1	ARHGDIA	CLNS1A	PPOX	KPNA2	LGALS7B	AP2S1	GPNMB	ARPP19	PURA	FOXK1	GALNT3	HSPG2	TTLL12
RPL34	PGD	MSH6	ACOT2	CLK2	AGFG1	BLM	GDI2	KPNA1	ZFP36L2	HCCS	KPNB1	AP1S2	CLTC	TNFAIP6	CAPRIN1	ARHGAP4	DOCK1
RPIA	HNRNPM	KIF11	VPS41	CLK3	HNRNPF	RARS1	EMD	NCBP2	UQCRFS1	SMTN	NUMA1	ATP5MJ	HSF1	DAB2	RBM39	EFNB1	CRMP1
LMAN1	KPNA2	VAV2	TMED10	EIF2B2	STAT2	HIRA	CPT1A	RAP1GDS1	ATP5PO	SLC16A1	SLMAP	ATP5ME	NFKB2	FBLN2	SPARCL1	RBM10	DPYSL3
NASP	KPNA1	ZNF131	RBM25	HINT1	GTF2A1	ATXN3	GATM	POLR2H	PREP	IST1	GAPVD1	EIF6	FKBP3	HSPG2	PDIA5	ATP2C1	MRPL58
FASN	NCBP2	ZNF143	NUMB	FHIT	MSH6	ATXN1	SERPINB8	MAP2K6	ME1	SEC24C	SPCS2	CTBP2	PLCB2	ARHGAP4	DHX8	ATP11A	DCTN1
FNTA	RAP1GDS1	RBM5	CLK2	NUP153	KIF11	ATN1	SERPINB9	ARHGDIA	IREB2	SUB1	EMC2	NDUFA6	REEP5	RBM10	ITPR3	CYCS	DYNC1H1
FNTB	DGKE	RIDA	CLK3	RANBP2	VAV2	PMS1	SERPINH1	ARHGDIB	RFX3	CLNS1A	PSMD6	HSD17B7	SORD	RBM3	ITIH4	MPP1	EIF2B1
DHPS	POLR2H	SMS	EIF2B2	TSC2	ZNF143	PMS2	PDLIM4	AGFG1	RFX5	RARS1	SEPTIN2	BCAR1	HNRNPU	ATP2C1	ITPR1	TFAM	EIF4A2
CCT3	MAP2K6	HK2	HINT1	NDUFV1	RBM5	YARS1	PEX5	HNRNPF	PIP4K2A	ATXN3	SART3	WDR4	SPTBN1	ATP11A	PLS1	PITPNA	CTTN
MRPL19	ARHGDIA	EFNB2	RARRES1	GSK3B	SMS	USP14	VASP	STAT2	SOX2	CACNA2D1	EXOSC7	TMEM33	TIAL1	CYCS	IRF3	SLC25A3	FLOT2
ARRB1	ARHGDIB	MRPL12	NUP153	STK19	HK2	PRKAG1	DNM2	GTF2A1	SOX9	YARS1	EFTUD2	SYNJ2BP	SET	TFAM	TRIP12	HDLBP	RCN2
TUFM	AGFG1	DGKQ	RANBP2	TAF6	EFNB2	PRKAA2	METAP2	MSH6	ARCN1	USP14	SNX17	RAB25	SRSF2	PITPNA	CLINT1	CDK3	TRIM25
ALDH7A1	HNRNPF	THOP1	RGS3	SULT1E1	MRPL12	HSPA2	NUDT2	KIF11	LSS	PRKAG1	RAB3GAP1	CORO7	GALK2	SLC25A3	SMC1A	CDK6	PTK2B
INPP1	STAT2	CAPZA1	PSEN2	NT5C2	DGKQ	ATP12A	TNFSF10	VAV2	PPP3CC	HSPA2	KARS1	NUP107	AMPD3	HDLBP	GANAB	CDK5	FLNC
CENPF	GTF2A1	HMGA2	TSC2	SEPHS1	NDST2	ATP1B3	CDK7	ZNF131	GCLC	BCAT1	KIAA0040	GSDMD	AMPD2	CDK6	RFTN1	PURA	FKBP8
SRP9	MSH6	NUP98	NDUFV1	MTHFS	THOP1	RAD23A	HLCS	RBM5	GCLM	ATP1B3	EIF4H	EEFSEC	CTBS	PURA	MFSD10	CDC42EP1	GNA13
UBE2A	KIF11	BLVRA	GSK3B	GMPS	AKR1C2	RAD23B	KNTC1	RIDA	TRAPPC10	RAD23A	ACAP2	EPPK1	ANK2	CDC42EP1	PPP2R5D	CLTC	GALE
PCYT1A	VAV2	SLC25A1	TAF6	LIG3	CAPZA1	EPHB4	CDK9	SMS	PSMD8	RAD23B	POSTN	ANTXR2	CAP1	CLTC	COG2	HSF1	LRRC32
AARS1	ZNF131	PPP5C	NT5C2	LIG4	HMGA2	EPHA4	LRBA	HK2	SERPINB4	EPHB3	ACOX1	SMIM11	FLI1	HSF1	MVP	NFKB2	GAS6
CARS1	ZNF143	PLK1	SEPHS1	MRE11	CRIP2	NAGLU	BCAM	EFNB2	PRRC2A	EPHA5	EEA1	RAB15	IFITM3	NFKB2	LTBP1	FKBP3	GALNT3
HARS2	RIDA	ARFIP2	CAMP	GNAQ	NUP98	GALC	PPT1	EFNA5	GSS	EPHB4	NCF4	GNG2	SLC7A5	FKBP3	LTBP2	PLCB2	CAPRIN1
SARS1	SMS	ARFIP1	MTHFS	GNG10	BLVRA	AK2	RPL14	MRPL12	CCT5	NAGLU	PDIA6	ARPC4	DR1	REEP5	GOLGB1	REEP5	RBM39
PPM1F	HK2	NUBP1	GMPS	IDH3A	SLC25A1	ALDH18A1	CCT8	DGKQ	PTDSS1	GALC	PAFAH1B3	CD81	FMO1	SORD	CASP8	SORD	SPARCL1
MAN2A2	EFNB2	ACLY	LIG3	MMP14	PPP5C	NAPA	CCT4	THOP1	HSPA13	AK2	AGER	SEC61G	EXOSC10	HNRNPU	FXYD3	HNRNPU	HABP2
PRIM1	MRPL12	METAP1	LIG4	PPOX	PLK1	EIF5	ANXA11	AKR1C2	CSNK1A1	ALDH18A1	PCOLCE	TPI1	OTUD4	IRF9	CHD4	IRF9	PDIA5
PRIM2	DGKQ	SUCLG1	CDKN1C	GDI2	DAPK1	SLC12A2	PAPOLA	CAPZA1	CSNK1D	NAPA	PEA15	EIF3E	PFKP	SPTBN1	LASP1	SPTBN1	ITPR3
CASP4	THOP1	MVD	MRE11	EMD	ARFIP2	PSMD4	FXR1	CRIP2	IDH2	ADPRH	PGM5	SEC61B	EWSR1	TIAL1	CRYM	TIAL1	ITIH4
CSNK1E	CAPZA1	PGGT1B	KHK	CPT1A	ARFIP1	DRG2	FXR2	NUP98	PITPNB	AIF1	PMVK	PPP4C	PLCB3	SET	PTGR1	SET	INPP5A
ARL4D	HMGA2	RABGGTB	HNMT	SLC26A2	NUBP1	CSE1L	RAB5C	BLVRA	ADGRE5	EIF5	PLEC	GABARAPL2	ROR1	GALK2	NFIX	SCN7A	ITPR1
PSMB3	NUP98	COPB1	GNAQ	SERPINB8	ACLY	TMBIM6	RAB7A	SLC25A1	POLD2	SLC12A2	PON2	MYL6	ROR2	AMPD3	GPNMB	SRSF2	PLS1
PSMB2	BLVRA	COPA	GNG4	SERPINB9	METAP1	VCP	RAB9A	PPP5C	MARCKSL1	PSMD4	PPP2R5A	EIF4A1	TAGLN	AMPD2	KPNB1	GALK2	TRIP12
MCM2	SLC25A1	CTSC	GNG10	SERPINH1	SUCLG1	MFAP1	RAB13	PLK1	PXN	DRG2	PPP2R5B	RPS20	NAAA	CTBS	NUMA1	AMPD3	CLINT1
ACADVL	PPP5C	AP3M2	IDH3A	PEX5	MVD	MFAP3	RAB28	ARFIP2	CAMLG	PLTP	PPA1	PSMA6	RHAG	CAP1	SLMAP	AMPD2	SMC1A
YLPM1	PLK1	AP2S1	SULT1A1	VASP	PGGT1B	HADHB	RAB27A	ARFIP1	NR2C2	CSE1L	PTGES3	S100A10	GUCY1A1	HMGCS1	GAPVD1	CTBS	USP10
VPS41	ARFIP2	HCCS	MMP14	DNM2	RABGGTB	MANF	PLCD1	NUBP1	MAPKAPK2	VCP	STK38	CDC42	GUCY1B1	IFITM3	SPCS2	ANK2	GANAB
TMED10	ARFIP1	SLC5A3	PPOX	METAP2	COPB1	AFDN	DAP3	ACLY	ALDH9A1	MFAP1	NONO	DSTN	OGDH	SLC7A5	EMC2	CAP1	RFTN1
RBM25	NUBP1	SLC16A1	GDI2	NUDT2	COPA	NAP1L1	DUSP3	METAP1	RPL34	MFAP4	PTPA	GMFB	ALDH6A1	DR1	WTAP	FLI1	MFSD10
NUMB	ACLY	IST1	EMD	TNFSF10	CTSC	CASP7	MMP15	SUCLG1	RPIA	HADHB	RABEP1	RAB8A	CYP27A1	EXOSC10	PSMD6	HMGCS1	PPP2R5D
CLK1	METAP1	SEC24C	CPT1A	CDK7	LIMK2	CASP6	SMARCA2	MVD	LMAN1	MANF	RAB35	SPCS3	BDH1	PFKP	SEPTIN2	IFITM3	LBR
CLK2	SUCLG1	SUB1	GATM	HLCS	AP2S1	ADK	SMARCA4	PGGT1B	NASP	NCKAP1L	RNPS1	SRP54	RPL18A	EWSR1	SART3	DR1	MVP
CLK3	MVD	POLG	SERPINB9	KNTC1	HCCS	ADAR	IDH3G	RABGGTB	FASN	AFDN	RBBP5	RAB4B	MAP2K1	OCRL	EXOSC7	FMO1	LTBP1
EIF2B2	PGGT1B	CLNS1A	SERPINH1	CDK9	SLC5A3	LAMB2	GALK1	COPB1	FNTA	NAP1L1	RCN1	RAB2A	FKBP4	TAGLN	EFTUD2	EXOSC10	LTBP2
HINT1	RABGGTB	BLM	PDLIM4	LRBA	SMTN	FOXA1	SSR4	COPA	FNTB	CASP7	LLGL1	RAB5B	PLOD1	NAAA	SNX17	OTUD4	GOLGB1
FHIT	COPB1	RARS1	PEX5	BCAM	PLAAT3	TPD52	BCAP31	CTSC	DHPS	CASP6	TMED2	CKS1B	NUCB1	GUCY1B1	RAB3GAP1	PFKP	FXYD3
NUP153	COPA	HIRA	VASP	PPT1	SLC16A1	PRMT2	TPMT	LIMK2	CCT3	ADK	PCBP1	RAB10	RASSF7	OGDH	KARS1	EWSR1	GRM7
RANBP2	CTSC	ATXN3	DNM2	RPL14	IST1	SEC13	CYP2J2	CLTCL1	MRPL19	ADAR	PCBP2	UBE2M	RPL6	ALDH6A1	KIAA0040	PLCB3	LASP1
TSC2	LIMK2	ATXN1	METAP2	CCT8	SEC24C	SNU13	MECP2	AP3M2	ARRB1	LAMB2	ELOC	UBE2K	TOP2B	CYP27A1	ACAP2	ROR2	CRYM
NDUFV1	CLTCL1	ATN1	NUDT2	CCT4	SUB1	NPEPPS	HCFC1	AP2S1	TUFM	CDH11	ELOB	UBE2N	AKAP12	DSC2	POSTN	TAGLN	PTGR1
GSK3B	AP3M2	TERF1	CDK7	ANXA11	POLG	HNRNPH2	ALDH3A2	HCCS	ALDH7A1	CDH13	TOMM20	RAB14	SLC25A11	RPL18A	ACOX1	NAAA	NFIX
STK19	AP2S1	PMS1	HLCS	PAPOLA	CLNS1A	OXCT1	ALDH5A1	SLC5A3	INPP1	TPD52	SF3B3	ACTR3	DST	MAP2K1	EEA1	SP2	GPNMB
TAF6	HCCS	PMS2	KNTC1	FXR1	BLM	EIF3B	HSD17B4	TTC3	CYB561	SEC13	RSU1	ACTR2	CAV1	FKBP4	PDIA6	GUCY1A1	ZNF638
SULT1E1	SLC5A3	YARS1	CDK9	FXR2	RARS1	BID	PSMD7	PLAAT3	SRP9	SNU13	CNN3	ACTR1A	ACY1	PLOD1	PAFAH1B3	DHODH	KPNB1
NT5C2	SLC16A1	USP14	LRBA	RAB5C	HIRA	ATP5MF	SUOX	SLC16A1	UBE2A	NPEPPS	SF3B4	TMEM258	TNFAIP2	NUCB1	AGER	GUCY1B1	NUMA1
SEPHS1	IST1	PRKAG1	BCAM	RAB7A	ATXN3	NDUFV3	SGSH	IST1	PCYT1A	HNRNPH2	SF3A2	COPS2	LMNB2	RPL6	PEA15	OGDH	GAPVD1
MTHFS	SEC24C	PRKAA2	PPT1	RAB9A	ATN1	RRP1	ARSD	SEC24C	AARS1	OXCT1	PPP1R7	ABCE1	MVK	TOP2B	PGM5	ALDH6A1	SPCS2
GMPS	SUB1	HSPA2	RPL14	RAB13	TERF1	MARS1	STAT5B	SUB1	CARS1	EIF3B	SEC23A	RAP2B	TAP1	AKAP12	PMVK	CYP27A1	EMC2
LIG3	POLG	BCAT1	CCT8	RAB28	PMS1	ITGA1	USP11	POLG	HARS2	FCGRT	SEC23B	RPS3A	TAP2	SLC25A11	PRKD1	MAP2K1	PSMD6
LIG4	CLNS1A	ATP1B3	CCT4	RAB27A	PMS2	ARPP19	CLCN3	CLNS1A	SARS1	BID	SF3A1	PSME3	CEBPZ	CAV1	PLEC	TEK	SEPTIN2
MRE11	BLM	RAD23A	ANXA11	PLCD1	MYOM2	POLE2	CLCN7	BLM	PPM1F	ATP5MF	RGN	RPL15	RELA	ACY1	PCM1	FKBP4	SART3
GNAQ	RARS1	RAD23B	PAPOLA	DAP3	YARS1	ATP5MJ	VAMP7	RARS1	MAN2A2	NDUFV3	MAPRE2	RPL27	UBXN1	TNFAIP2	PON2	PLOD1	EFTUD2
GNG10	HIRA	EPHA5	FXR1	DUSP3	USP14	ATP5ME	RPS6KA3	HIRA	PRIM1	MARS1	TGFBI	ATP6V0D1	GBE1	LMNB2	PPP2R5A	NUCB1	SNX17
IDH3A	ATXN3	EPHB4	FXR2	SMARCA2	PRKAG1	EIF6	AKR1D1	ATXN3	PRIM2	ITGA1	NHERF2	PCBD1	EIF4G1	PTS	PPA1	RPL6	RAB3GAP1
MMP14	ATXN1	NAGLU	RAB5C	SMARCA4	HSPA2	CTBP2	HDGF	ATN1	CASP4	ARPP19	TRAM1	RPL37A	ATP7A	PLAUR	PTGES3	TOP2B	KARS1
PPOX	ATN1	GALC	RAB7A	IDH3G	ATP1B3	NDUFA6	LUM	PMS1	ARL4D	AP1S2	TSN	HSPE1	KRT17	MVK	STK38	AKAP12	RRS1
GDI2	TERF1	AK2	RAB9A	GALK1	RAD23A	PEX3	CCNH	YARS1	CTCF	ATP5MJ	SF1	SEC61A1	TLE3	TAP1	NONO	SLC25A11	KIAA0040
EMD	PMS2	ALDH18A1	RAB13	SSR4	RAD23B	HSD17B7	MNAT1	USP14	PSMB3	ATP5ME	TRIP10	LYZ	TLE4	TAP2	PTPA	DST	ACAP2
CPT1A	YARS1	NAPA	RAB27A	BCAP31	EPHB3	BCAR1	NDUFA8	PRKAG1	PSMB2	EIF6	TRIP6	VBP1	HGFAC	COL10A1	RABEP1	CAV1	POSTN
SLC26A2	USP14	EIF5	DAP3	TPMT	EPHA5	STX17	HNRNPA3	PRKAA2	MCM2	CTBP2	MAPRE1	STXBP1	GLO1	CEBPZ	RNPS1	ACY1	ACOX1
SERPINB8	PRKAG1	SLC12A2	DUSP3	MECP2	EPHB4	UBASH3A	PGD	HSPA2	ACADVL	NDUFA6	TSC22D1	B2M	SSBP1	RELA	RBBP5	TGFBR3	EEA1
SERPINB9	PRKAA2	PSMD4	MMP15	HCFC1	NAGLU	CFAP298	HNRNPM	ATP12A	YLPM1	ARL4C	NSDHL	DAD1	REL	GBE1	RCN1	TNFAIP2	NCF4
SERPINH1	HSPA2	DRG2	SMARCA2	IRAK1	GALC	WDR4	KPNA2	ATP1B3	VPS41	BCAR1	MYLK	NPC2	YWHAH	FOLH1	TMED2	LMNB2	PDIA6
PEX5	BCAT1	PLTP	SMARCA4	CAV2	AK2	TMEM33	KPNA1	RAD23A	TMED10	UBASH3A	TAB1	COPZ1	PLP2	EIF4G1	PCBP1	MVK	PAFAH1B3
VASP	ATP12A	CSE1L	IDH3G	ALDH3A2	ALDH18A1	SYNJ2BP	NCBP2	RAD23B	RBM25	CFAP298	SLC1A5	UFM1	CSTF1	KRT17	PCBP2	TAP1	AGER
DNM2	ATP1B3	VCP	GALK1	ALDH5A1	NAPA	GEMIN4	RAP1GDS1	EPHB3	NUMB	WDR4	ITSN1	DCAF7	UBE3A	TLE3	ELOC	TAP2	PCOLCE
METAP2	RAD23A	MFAP1	SSR4	HSD17B4	EIF5	KLF3	POLR2H	EPHB4	CLK2	TMEM33	TBCE	WDR5	DNM1	HGFAC	ELOB	RELA	PEA15
NUDT2	RAD23B	MFAP3	BCAP31	PSMD7	SLC12A2	RAB38	MAP2K6	NAGLU	CLK3	SYNJ2BP	UBE2V2	AP1S1	PTPN12	GLO1	SF3B3	UBXN1	PGM5
CDK7	EPHA5	HADHB	TPMT	SGSH	PSMD4	RAB25	ARHGDIA	GALC	EIF2B2	GEMIN4	STXBP2	NUTF2	CLC	SSBP1	RSU1	GBE1	EBP
HLCS	EPHB4	MANF	MECP2	ARSD	DRG2	CORO7	ARHGDIB	AK2	HINT1	RAB38	VAMP3	HNRNPK	PTK2	MST1R	CNN3	FOLH1	PMVK
KNTC1	NAGLU	AFDN	HCFC1	STAT5B	CSE1L	NUP107	AGFG1	ALDH18A1	RARRES1	RAB25	NEDD8	YWHAG	SRSF11	YWHAH	PPP1R7	EIF4G1	PLEC
CDK9	GALC	ELL	IRAK1	USP11	VCP	GSDMD	HNRNPF	NAPA	FHIT	CORO7	ADIRF	RRAS2	PRKCD	PLP2	SEC23A	ATP7A	PCM1
LRBA	AK2	NAP1L1	ALDH3A2	CLCN2	MFAP1	EEFSEC	STAT2	EIF5	NUP153	NUP107	ADIPOQ	TIMM10	CALD1	CSTF1	SEC23B	KRT17	PON2
BCAM	ALDH18A1	CASP7	ALDH5A1	CLCN6	MFAP3	SESN2	GTF2A1	SLC12A2	RANBP2	GSDMD	RAB11B	RPS7	COL14A1	UBE3A	SF3A1	TLE3	PPP2R5A
PPT1	NAPA	CASP6	HSD17B4	CLCN7	HADHB	SESN3	MSH6	PSMD4	RGS3	EEFSEC	ZYX	PPP1CA	ITIH3	PTPN12	SKIC2	HGFAC	PPP2R5B
RPL14	EIF5	ADK	PSMD7	PLXNA3	MANF	EPPK1	KIF11	DRG2	TSC2	EPPK1	ETFDH	PPP1CB	PTPN11	CLC	RGN	GLO1	PPA1
CCT8	SLC12A2	ADAR	SUOX	VAMP7	AFDN	ANTXR2	VAV2	CSE1L	NDUFV1	ANTXR2	SEPTIN7	NCS1	KDSR	PTK2	SPA17	SSBP1	NONO
CCT4	PSMD4	LAMB2	SGSH	RPS6KA3	NAP1L1	SMIM11	ZNF131	AQP5	GSK3A	ADAMTS12	CCDC6	PSMC1	PPAT	SRSF11	MAPRE2	REL	PTPA
ANXA11	DRG2	FOXA1	ARSD	ADCY7	CASP7	MTPN	RBM5	VCP	GSK3B	SMIM11	LAMA4	PSMC5	GFPT1	EEF1A2	TGFBI	YWHAH	RABEP1
PAPOLA	PLTP	TPD52	USP11	HDGF	CASP6	YBEY	RIDA	MFAP1	STK19	MTPN	PSMD5	RPS8	AOX1	PRKCD	NHERF2	PLP2	RNPS1
FXR1	CSE1L	PRMT2	CLCN2	LUM	GP2	RAB15	SMS	HADHB	TAF6	RAB15	PKN1	RPS15A	PSME1	CALD1	TRADD	CSTF1	RBBP5
FXR2	VCP	SEC13	CLCN3	PRELP	ADK	AP3S2	HK2	MANF	NT5C2	GNG2	PKN2	RPS16	FMR1	COL14A1	TRAM1	UBE3A	RCN1
RAB5C	MFAP1	SNU13	CLCN6	CCNH	ADAR	ARPC4	MRPL12	AFDN	SEPHS1	ARPC4	CSRP2	UBE2H	FMOD	ITIH3	TSN	DNM1	TMED2
RAB7A	MFAP3	PAX9	CLCN7	MNAT1	LAMB2	CD81	DGKQ	NAP1L1	MTHFS	CD81	DDB1	YWHAE	PRDX1	PTPN11	SF1	PTPN12	PCBP1
RAB9A	HADHB	NPEPPS	VAMP7	NDUFA8	FOXA1	SEC61G	THOP1	CASP7	GMPS	SEC61G	PPP2R5E	RPS14	RPL18	KDSR	TRIP10	CLC	PCBP2
RAB13	MANF	GFER	RPS6KA3	HNRNPA3	TPD52	TPI1	AKR1C2	CASP9	LIG3	TPI1	MAPK14	RPS23	C1QBP	PPAT	TRIP6	PTK2	ELOC
RAB28	AFDN	HNRNPH2	NR0B1	MYOM1	SEC13	EIF3E	CAPZA1	CASP6	LIG4	EIF3E	CDC37	RPS18	CKAP4	GFPT1	MAPRE1	SRSF11	ELOB
RAB27A	NAP1L1	OXCT1	HDGF	PGD	SNU13	SEC61B	HMGA2	ADK	MRE11	SEC61B	DPYSL2	RPS13	TJP1	EXOSC9	TSC22D1	PRKCD	UBE3C
PLCD1	CASP7	EIF3B	LUM	HNRNPM	NPEPPS	PTEN	CRIP2	ADAR	HNMT	PPP4C	ACKR1	SNRPE	KHDRBS1	PSME1	ELAVL1	CALD1	SF3B3
DAP3	CASP6	BID	CCNH	KPNA2	HNRNPH2	PPP4C	NUP98	LAMB2	GNAQ	GABARAPL2	RBBP7	LSM3	BAX	APLP2	NSDHL	COL14A1	RSU1
DUSP3	ADK	ATP5MF	MNAT1	KPNA1	OXCT1	MYL6	BLVRA	FOXA1	GNG10	MYL6	SGCB	LSM6	KLC1	GABPA	MYLK	ITIH3	CNN3
SMARCA2	ADAR	NDUFV3	NDUFA8	NCBP2	EIF3B	EIF4A1	SLC25A1	TPD52	IDH3A	EIF4A1	ECM1	SNRPD1	LRP1	FMR1	SLC1A5	PTPN11	SF3A2
SMARCA4	LAMB2	RRP1	HNRNPA3	RAP1GDS1	FCGRT	RPS20	PPP5C	PRMT2	SULT1A1	RPS20	OCLN	SNRPD2	SRSF1	FMOD	TOMM34	KDSR	PPP1R7
IDH3G	TPD52	MARS1	MYOM1	DGKE	BID	PSMA6	DAPK1	SEC13	MMP14	PSMA6	SRSF7	SNRPD3	ARHGAP1	PRDX1	UBE2V2	PPAT	SEC23A
SSR4	SEC13	ARPP19	PGD	POLR2H	ATP5MF	S100A10	ARFIP2	SNU13	PPOX	S100A10	CPSF6	ARF6	SRSF4	RPL18	STXBP2	GFPT1	SEC23B
BCAP31	SNU13	MAZ	HNRNPM	MAP2K6	NDUFV3	CDC42	ARFIP1	NPEPPS	GDI2	CDC42	DBN1	PSMC6	PPP3CA	C1QBP	VAMP3	AOX1	SF3A1
TPMT	NPEPPS	POLE2	KPNA2	ARHGDIA	RRP1	DSTN	NUBP1	GFER	EMD	DSTN	PTGIS	SELENOT	DHX9	CKAP4	NEDD8	PSME1	FCN2
MECP2	GFER	ATP5ME	KPNA1	ARHGDIB	MARS1	GMFB	ACLY	HNRNPH2	CPT1A	GMFB	FSCN1	RPL7A	CRYZ	COL16A1	ADIRF	APLP2	RGN
HCFC1	HNRNPH2	LGALS4	NCBP2	AGFG1	ARPP19	RAB8A	METAP1	OXCT1	GATM	RAB8A	IFI16	POLR2G	GOLGA3	TJP1	ADIPOQ	GABPA	MAPRE2
IRAK1	OXCT1	EIF6	RAP1GDS1	HNRNPF	POLE2	SPCS3	SUCLG1	EIF3B	SLC26A2	SPCS3	DECR1	ETF1	GOLGA2	DPT	RAB11B	FMR1	TGFBI
CAV2	EIF3B	CTBP2	DGKE	STAT2	ATP5ME	SRP54	MVD	BID	SERPINB8	SRP54	NDUFA5	RPS4X	LGALS3BP	KHDRBS1	ZYX	FMOD	NHERF2
ALDH3A2	FCGRT	NDUFA6	POLR2H	GTF2A1	LGALS4	RAB2A	PGGT1B	ATP5MF	SERPINB9	RAB4B	KYNU	RPL23A	LOXL1	BAX	ETFDH	PRDX1	TRADD
ALDH5A1	BID	ARL4C	MAP2K6	MSH6	EIF6	RAB5B	RABGGTB	NDUFV3	SERPINH1	RAB2A	CLPP	RPS6	MFGE8	BCL2L1	SEPTIN7	RPL18	TRAM1
HSD17B4	ATP5MF	PEX3	ARHGDIA	KIF11	CTBP2	CKS1B	COPB1	RRP1	PDLIM4	RAB5B	TST	VSNL1	DMTN	KLC1	ADRM1	C1QBP	TSN
PSMD7	NDUFV3	HSD17B7	AGFG1	VAV2	NDUFA6	RAB10	COPA	MARS1	PEX5	RAB10	GUK1	H4C16	PUDP	LRP1	CCDC6	CKAP4	SF1
SGSH	RRP1	BCAR1	HNRNPF	ZNF131	PEX3	UBE2M	CTSC	ITGA1	ERF	UBE2M	HAGH	RAB1A	CD47	SRSF1	UAP1	TJP1	TRIP10
ARSD	MARS1	STX17	GTF2A1	ZNF143	WNT7B	UBE2K	LIMK2	ARPP19	VASP	UBE2K	LAMA3	RAN	PPID	ARHGAP1	IGFBP7	KHDRBS1	TRIP11
STAT5B	ARPP19	UBASH3A	MSH6	RBM5	CLDN18	UBE2N	CLTCL1	POLE2	DNM2	UBE2N	NDUFA9	RPL23	SSRP1	SRSF4	LAMA4	BAX	TRIP6
USP11	POLE2	CFAP298	KIF11	CHN2	HSD17B7	RAB14	AP3M2	ATP5MJ	METAP2	RAB14	ME3	RAP1A	VAC14	PCDH1	PSMD5	KLC1	MAPRE1
CLCN2	ATP5ME	WDR4	VAV2	RIDA	BCAR1	ACTR3	AP2S1	ATP5ME	NUDT2	ACTR3	RTN1	RPS15	NSUN2	PPP3CA	PKN1	LRP1	TSC22D1
CLCN3	EIF6	TMEM33	ZNF131	SMS	STX17	ACTR2	HCCS	EIF6	TNFSF10	ACTR2	PCK2	RPS24	RBBP4	DHX9	PKN2	SRSF1	NSDHL
[truncated: 5,087 more rows]
